# Supplementary material for: N-glycosylation of Colorectal Cancer Tissues: A LIQUID CHROMATOGRAPHY AND MASS SPECTROMETRY-BASED INVESTIGATION
Source: PubMed Central journal article supplement — Mol Cell Proteomics. 2012 May 9;11(9):571–85. doi: 10.1074/mcp.M111.011601 (PMC3434767; doi:10.1074/mcp.m111.011601), 2012-05-09

## N-glycosylation of colorectal cancer tissues: a liquid chromatography and mass spectrometry-based investigation

Crina I.A. Balog<sup>1</sup>, Kathrin Stavenhagen<sup>1</sup>, Wesley L.J. Fung<sup>1</sup>, Carolien A. Koeleman<sup>1</sup>, Liam M. McDonnell<sup>1</sup>, Aswin Verhoeven<sup>1</sup>, Wilma E. Mesker<sup>2</sup>, Rob A. E. M. Tollenaar<sup>2</sup>, André M. Deelder<sup>1</sup> & Manfred Wuhrer<sup>1</sup>

<sup>1</sup> Biomolecular Mass Spectrometry Unit, Department of Parasitology, Leiden University Medical Center, Leiden, The Netherlands

<sup>2</sup> Department of Surgery, Leiden University Medical Center, Leiden, The Netherlands

**Supplementary Figure 1. MS/MS spectra of N-glycan structures detected in colorectal cancer tissues.** The pooled AA-labeled glycans released from the colorectal cancer tissues were fractionated by HILIC-HPLC, and subsequently all fractions were analyzed by MALDI-ToF-MS. In addition, many HILIC-fractions were analyzed by ESI-ion trap-MS/MS (positive-ion mode) and MALDI-ToF-MS/MS (negative-ion mode). The obtained fragmentation spectra, in combination with general knowledge of human glycobiology, were used for structural assignments. Based on this interpretation, the presence of structural isomers can not be excluded. The MS/MS fragmentation spectra were interpreted manually and using ProteinScape software. Glycan compositions as well as proposed schematic structures are given where possible. The spectrum numbers refer to Supplementary Table 1. Glycan schemes were prepared using GlycoWorkbench (*Red triangle*, dHex, fucose; *yellow circle*, Hex, galactose; *green circle*, Hex, mannose; *blue square*, HexNAc, *N*-acetylglucosamine; *white square*, HexNAc, *N*-acetylhexosamine; *purple diamond*, Neu5Ac, sialic acid; *S*, sulfate; *Ac*, acetyl group). Lift, MALDI-ToF/ToF-MS experiment.

# Spectrum 1

Lift of 852.3 [M-H]<sup>-</sup>

dHex1Hex1HexNAc2-AA

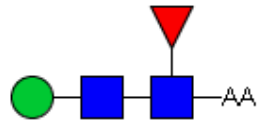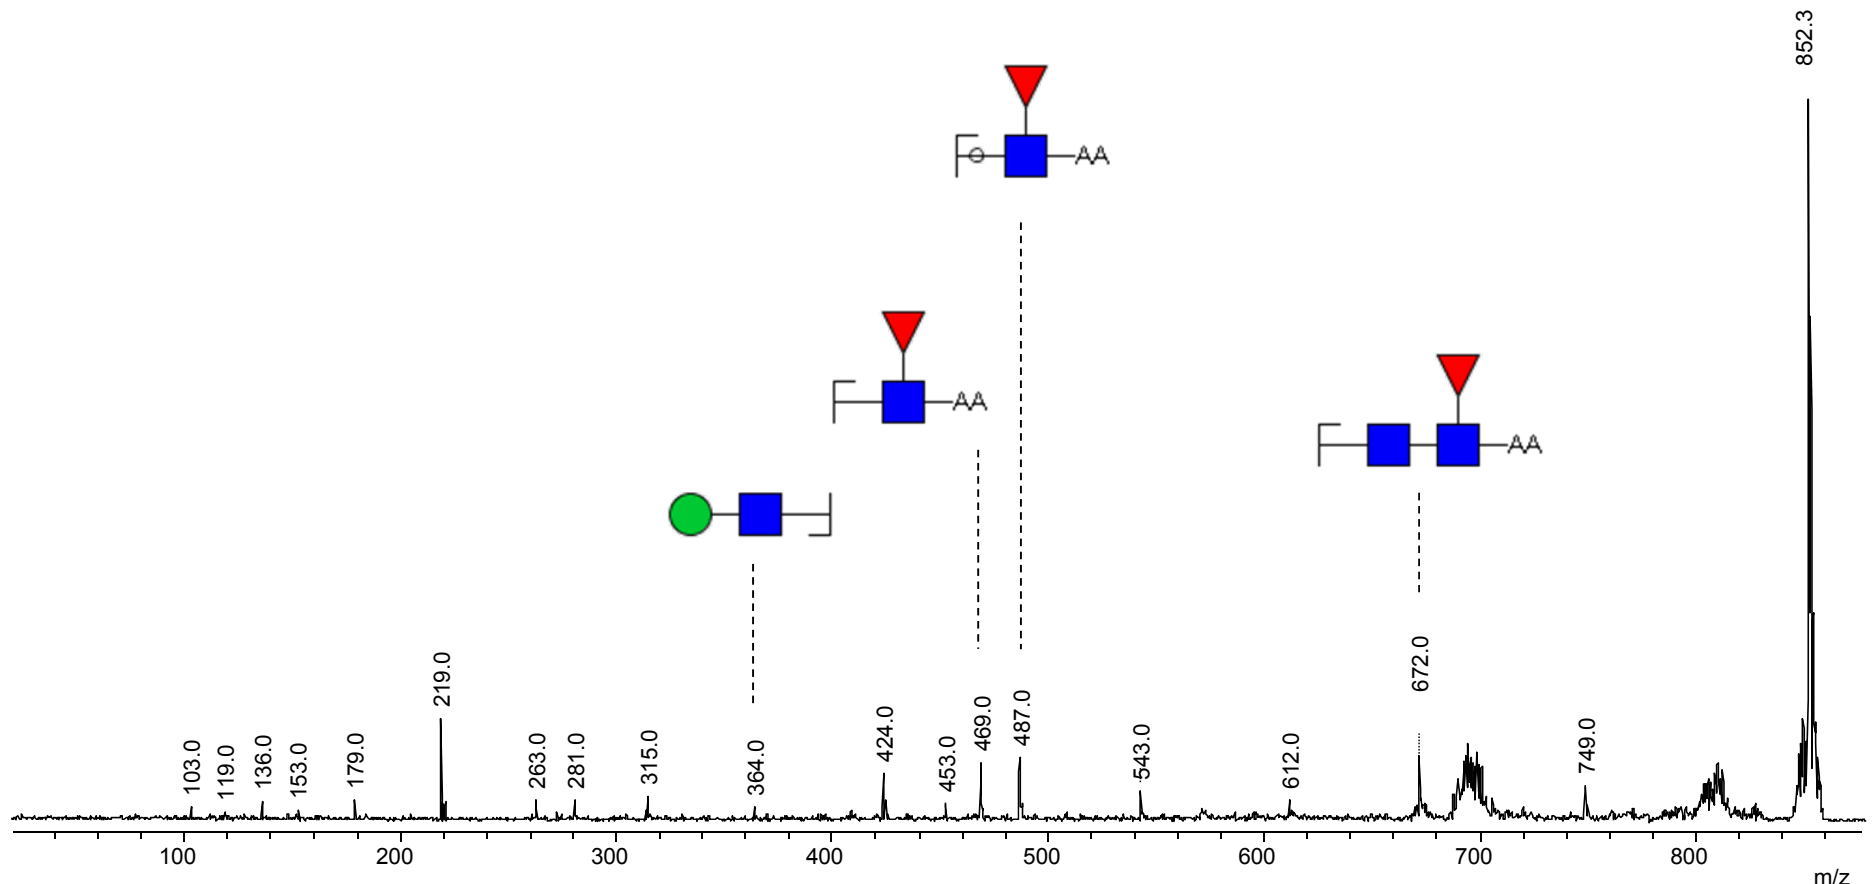

# Spectrum 2

Lift of 868.3 [M-H]<sup>-</sup>  
Hex2HexNAc2-AA

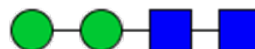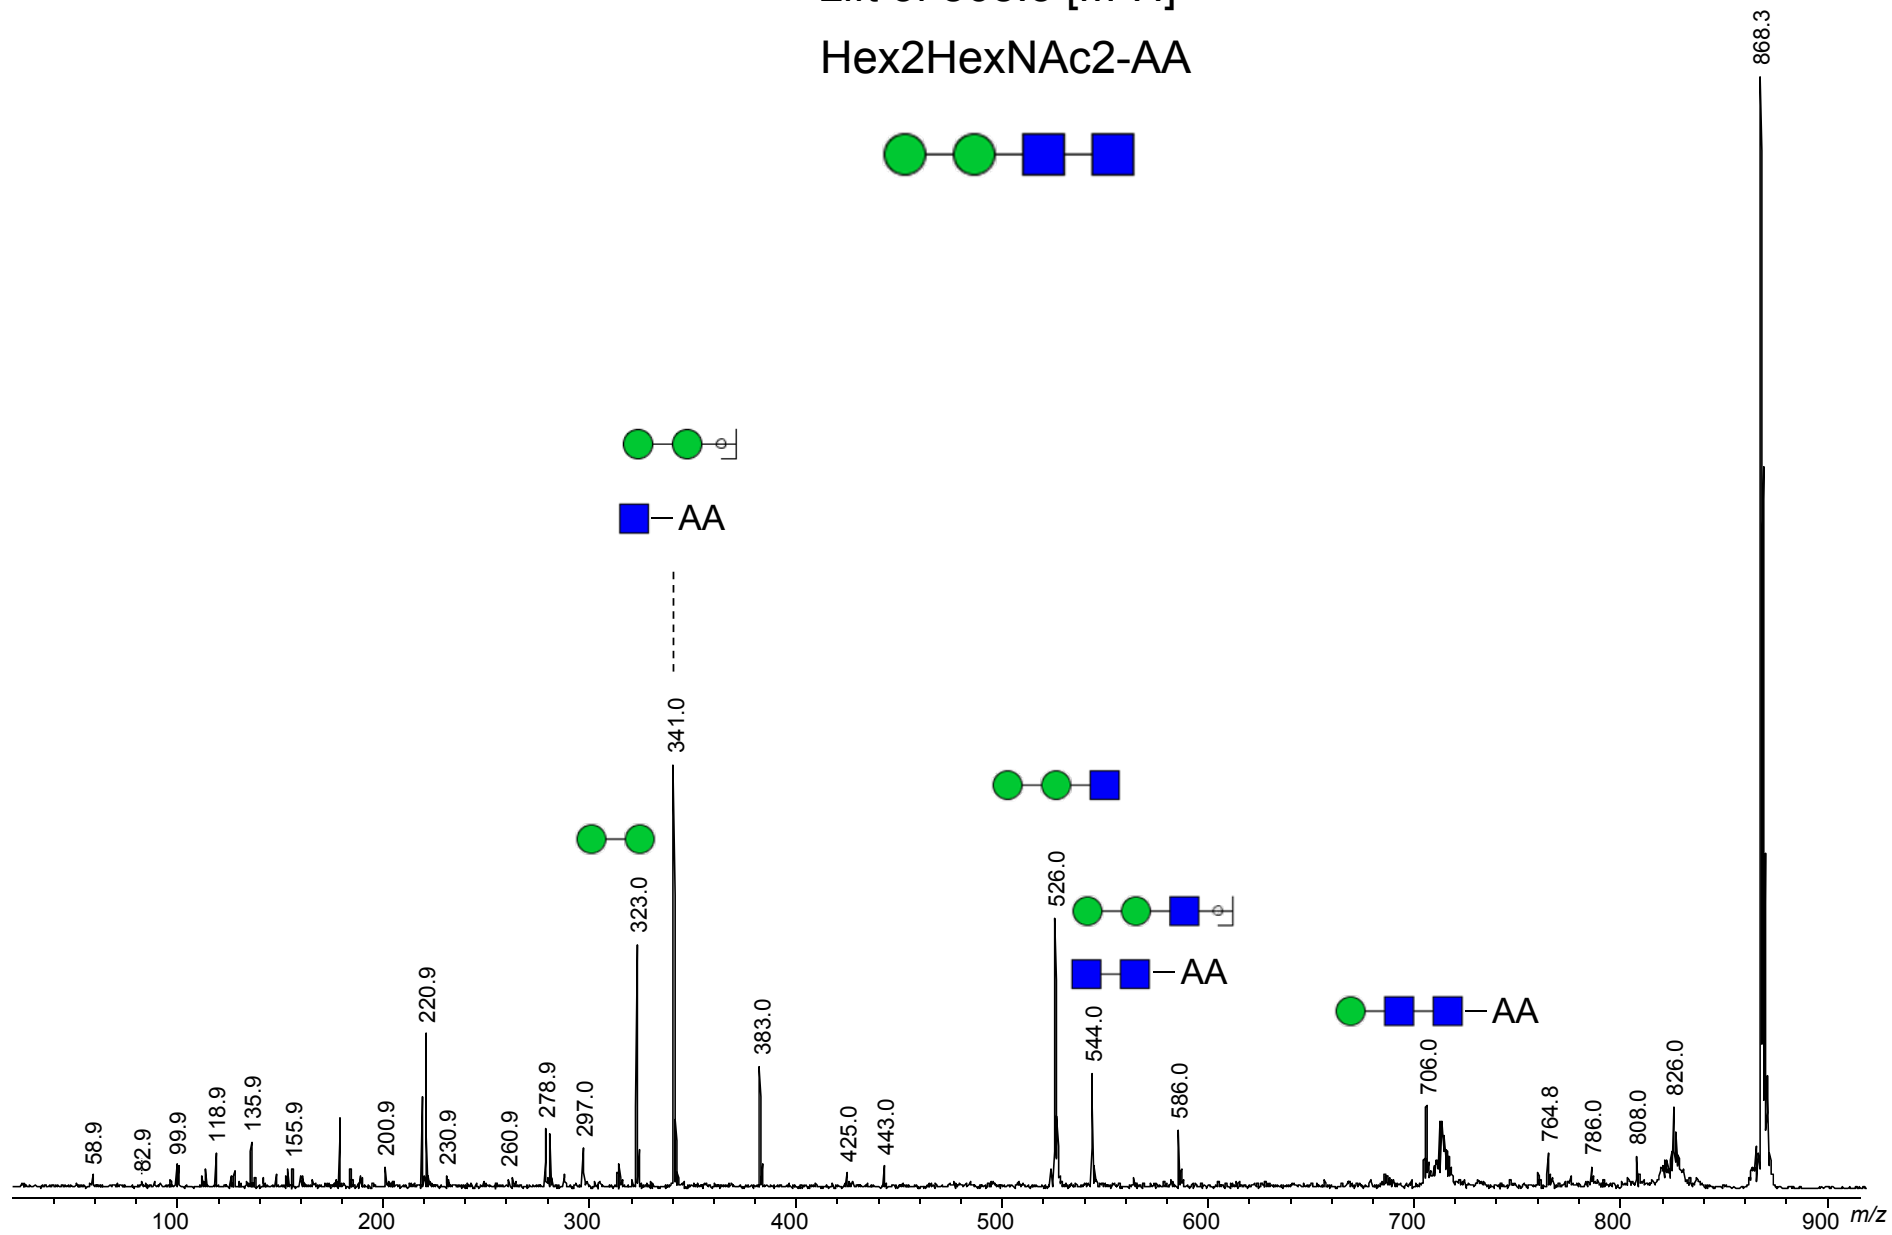

# Spectrum 3

Lift of 1014.4 [M-H]<sup>-</sup>  
dHex1Hex2HexNAc2-AA

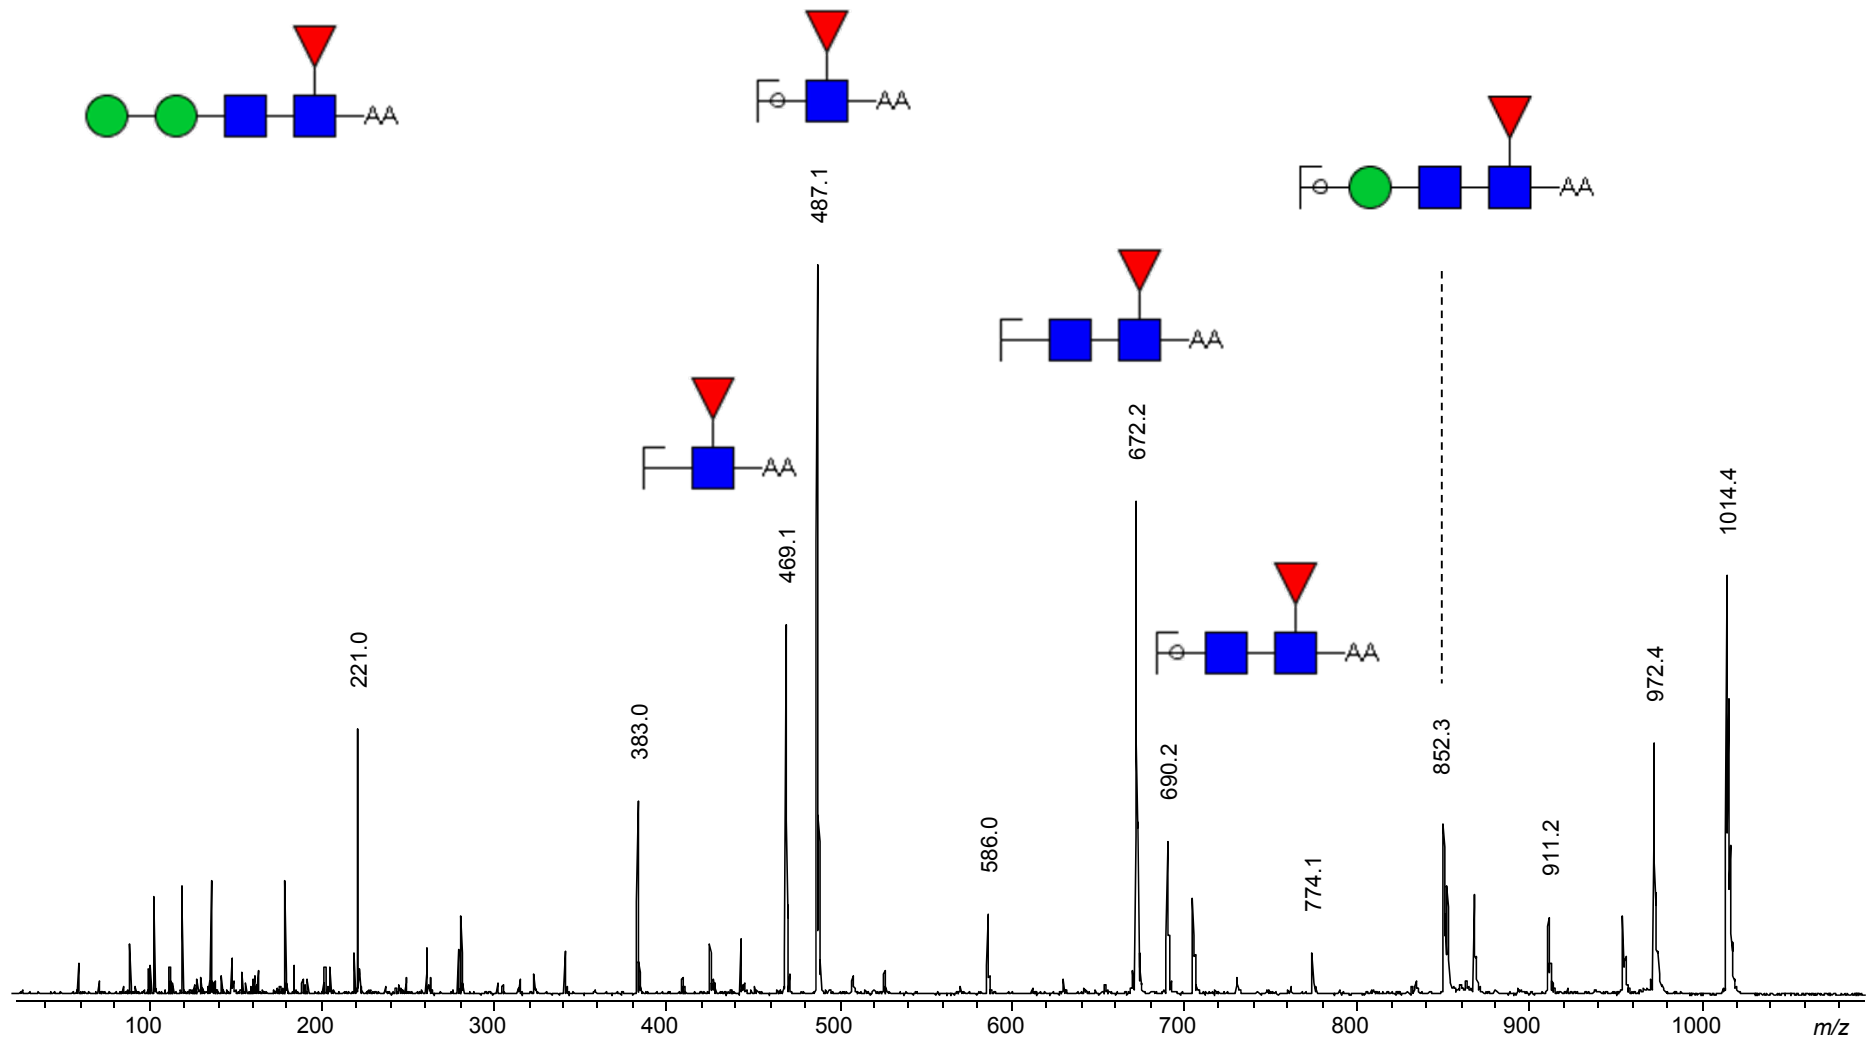

# Spectrum 4

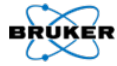

## Glycan Search Report

Glycan: 1

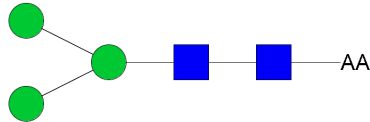

**Project path:** /N-glycans cancer/Lift spectra 02/CombinedUNKNOWN

**MS data:** c:/documents and settings/ciabalog/desktop/lift/lift of 1030/0\_a24/1/1030.4000.lift/1sref/pdata/1/1r

**Parent m/z:** 1030.3732 -1

**Score:** 48.849

**Composition:** Hex3HexNAc2-AA

**Intensity coverage [%]:** 0.33

**Accession:** 36759

**Fragment coverage [%]:** 0.73

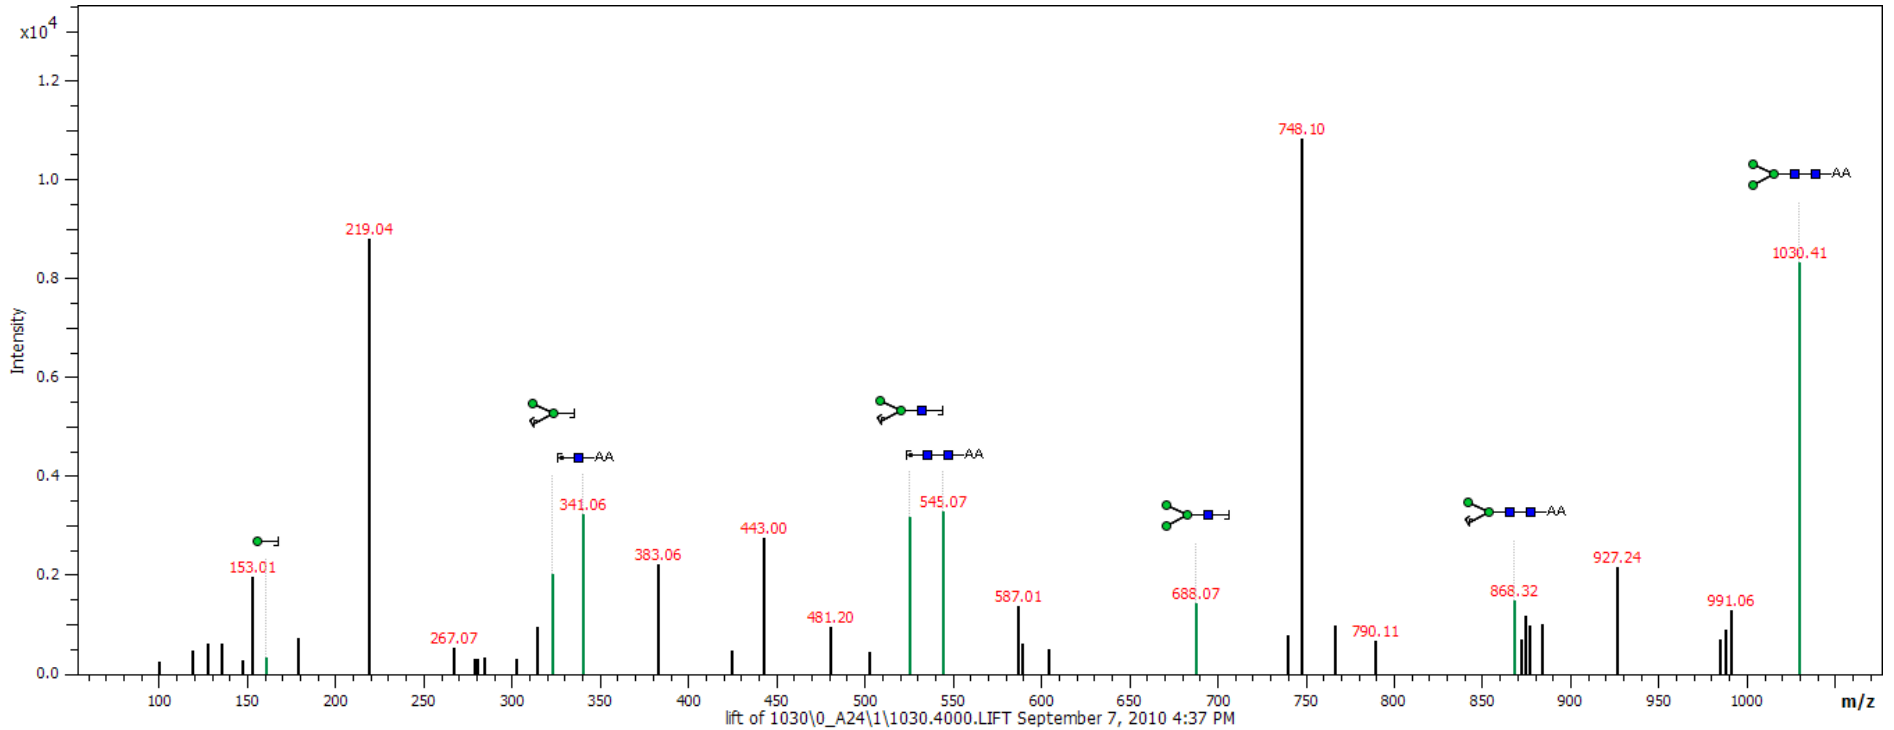

# Spectrum 5

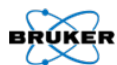

## Glycan Search Report

Glycan: 1

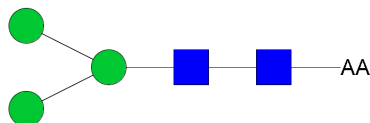

**Project path:** /N-glycans cancer/25140/comp\_25140.mgf

**MS data:** K:/Cancer-CCR/N-glycans raw data\_MS/LC-MS of the discriminators/25140\_01.d/comp\_25140.mgf

**Parent m/z:** 516.6975 2+

**Score:** 51.434

**Composition:** Hex3HexNAc2-AA

**Intensity coverage [%]:** 0.52

**Accession:** 954

**Fragment coverage [%]:** 0.51

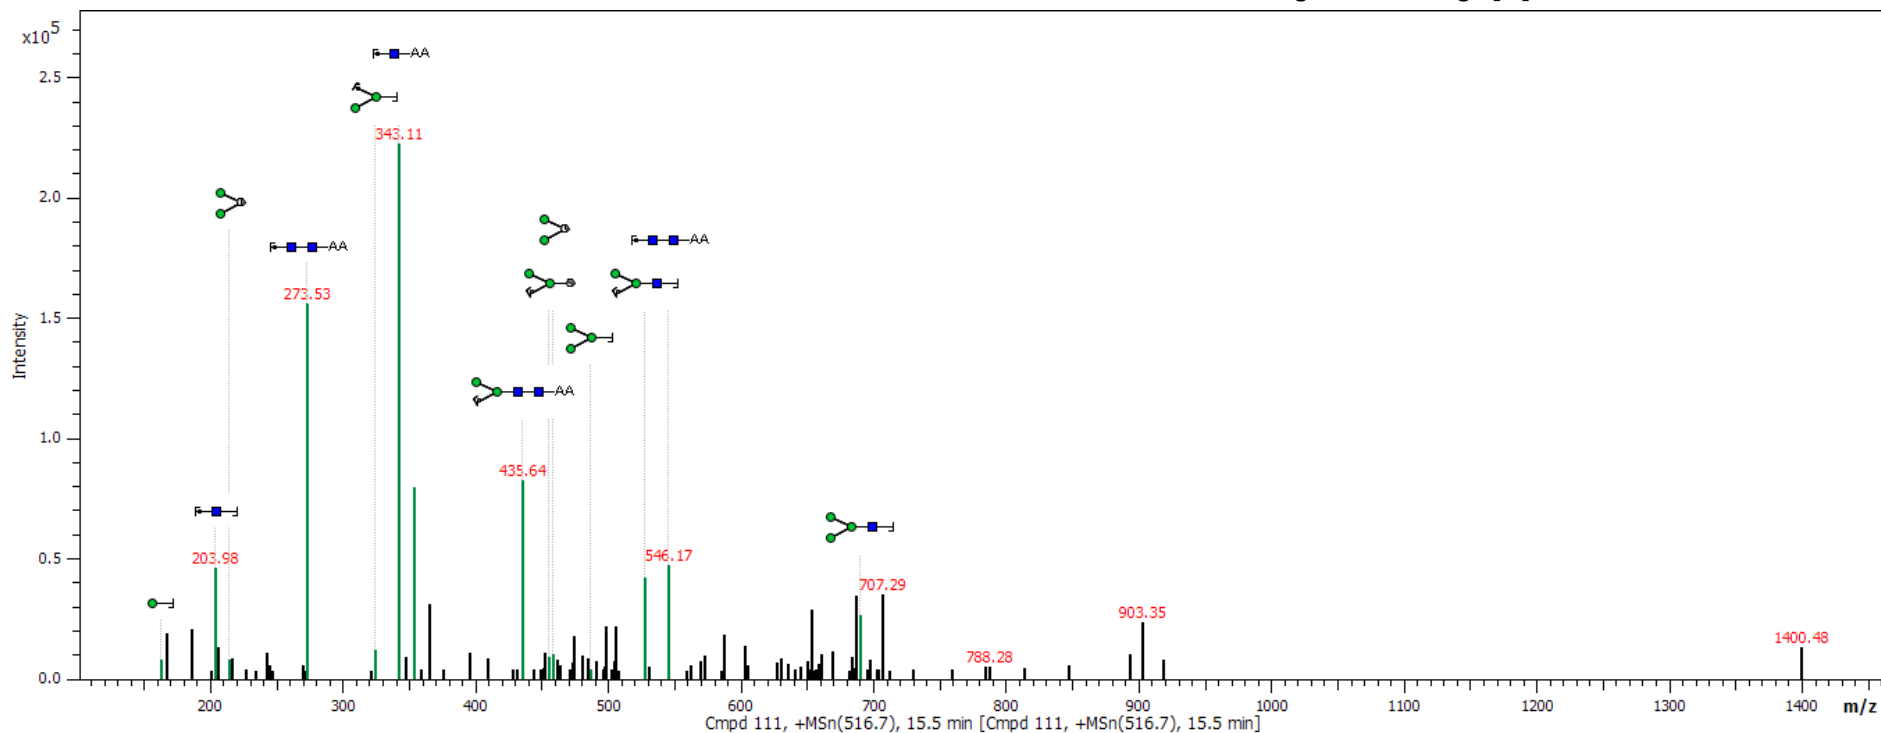

# Spectrum 6



## Glycan Search Report

Glycan: 2

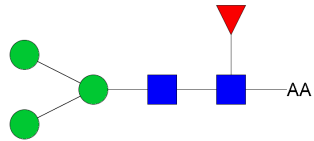

**Project path:** /N-glycans cancer/Lift spectra 02/CombinedUNKNOWN

**MS data:** c:/documents and settings/ciabalog/desktop/lift/lift of 1176/0\_b4/1/1176.4000.lift/1sref/pdata/1/1r

**Parent m/z:** 1176.4311 -1

**Score:** 45.195

**Composition:** Hex3HexNAc2dHex1-AA

**Intensity coverage [%]:** 0.55

**Accession:** 1020

**Fragment coverage [%]:** 0.37

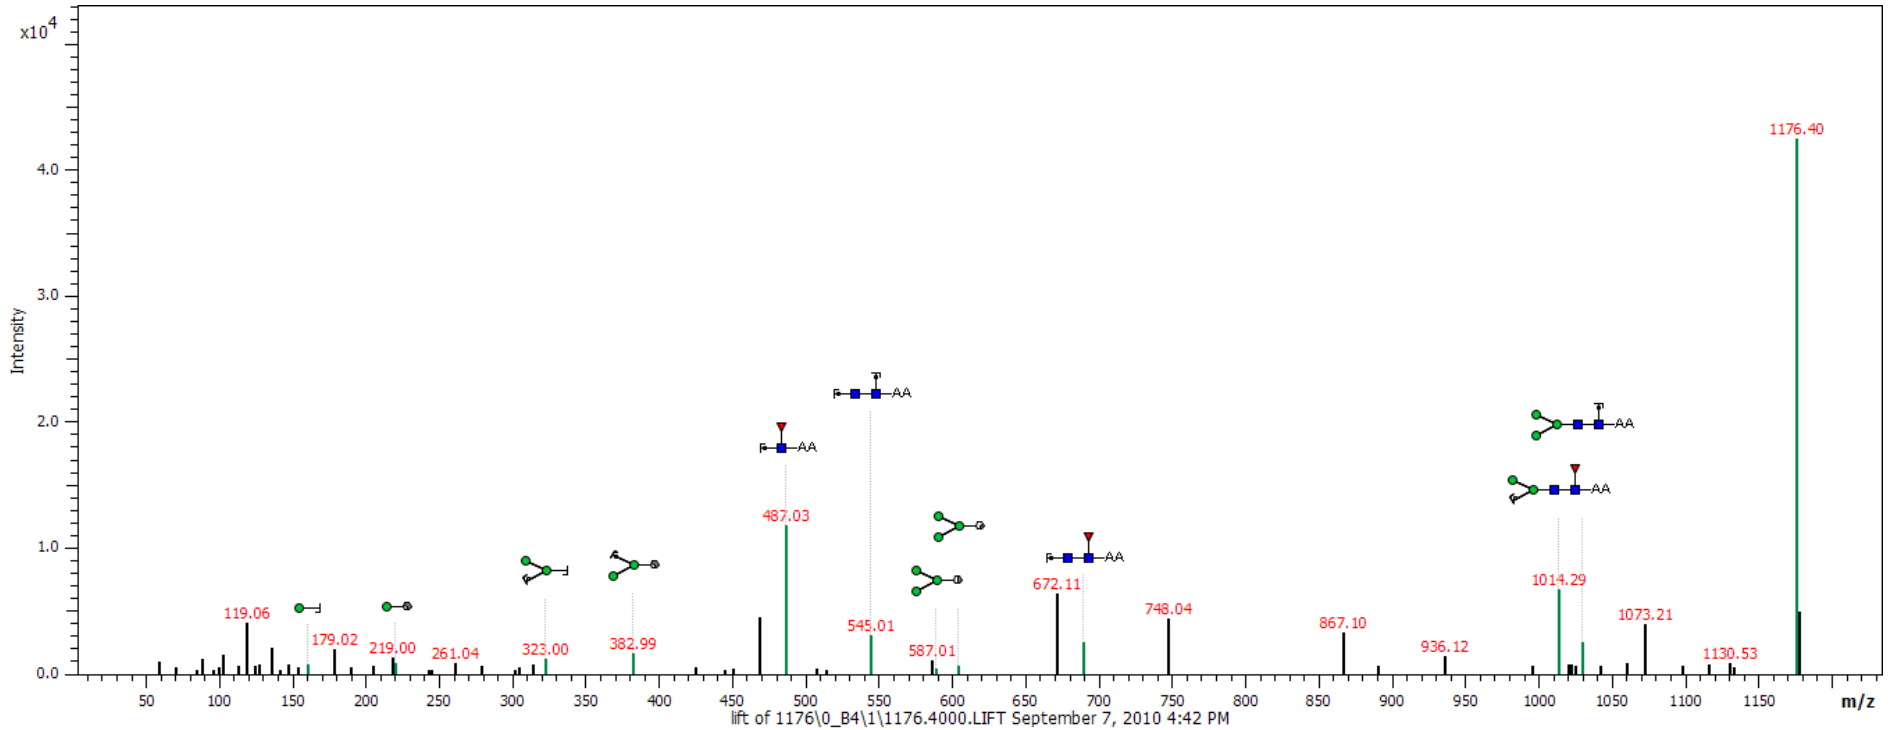

# Spectrum 7

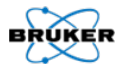

## Glycan Search Report

Glycan: 1

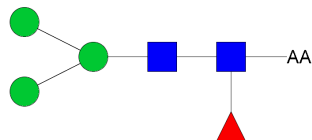

**Project path:** /N-glycans cancer/25144/comp\_25144.mgf

**MS data:** K:/Cancer-CCR/N-glycans raw data\_MS/LC-MS of the discriminators/25144\_01.d/comp\_25144.mgf

**Parent m/z:** 589.7265 2+

**Score:** 67.874

**Composition:** Hex3HexNAc2dHex1-AA

**Intensity coverage [%]:** 0.69

**Accession:** 9259

**Fragment coverage [%]:** 0.67

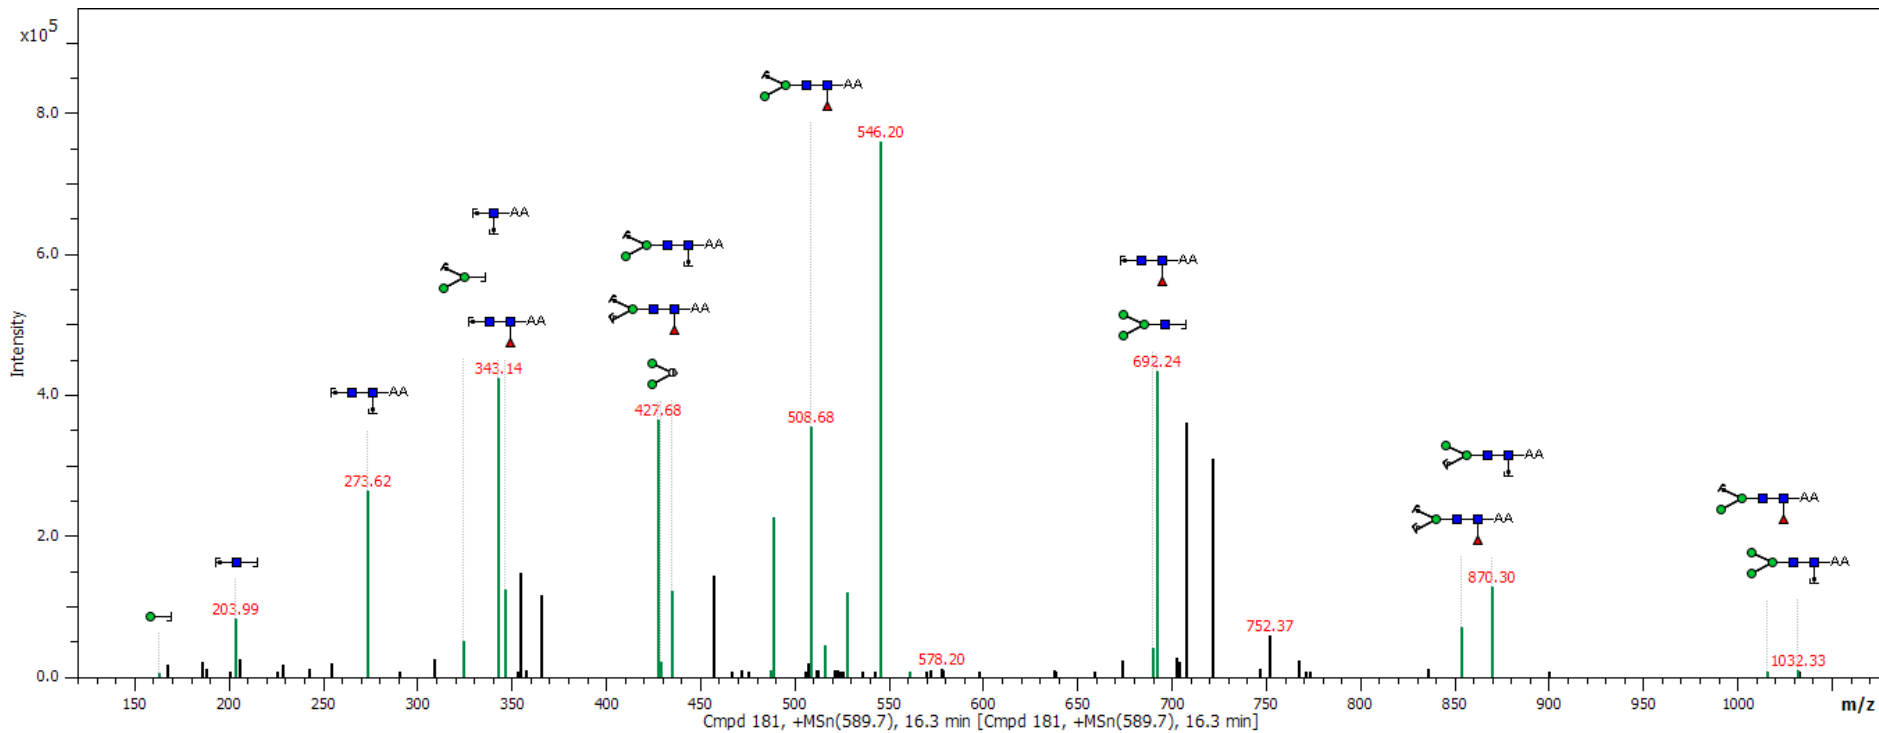



# Spectrum 8



## Glycan Search Report

Glycan: 6

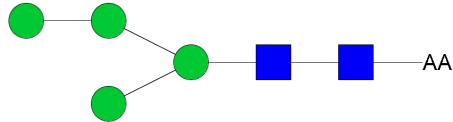

**Project path:** /N-glycans cancer/Lift spectra/CombinedLIFT

**MS data:** c:/documents and settings/ciabalog/desktop/new folder/lift of 1192/0\_b8/1/1192.4000.lift/  
1sref/pdata/1/1r

**Parent m/z:** 1192.4260 -1

**Score:** 53.623

**Composition:** Hex4HexNAc2-AA

**Intensity coverage [%]:** 0.68

**Accession:** 951

**Fragment coverage [%]:** 0.42

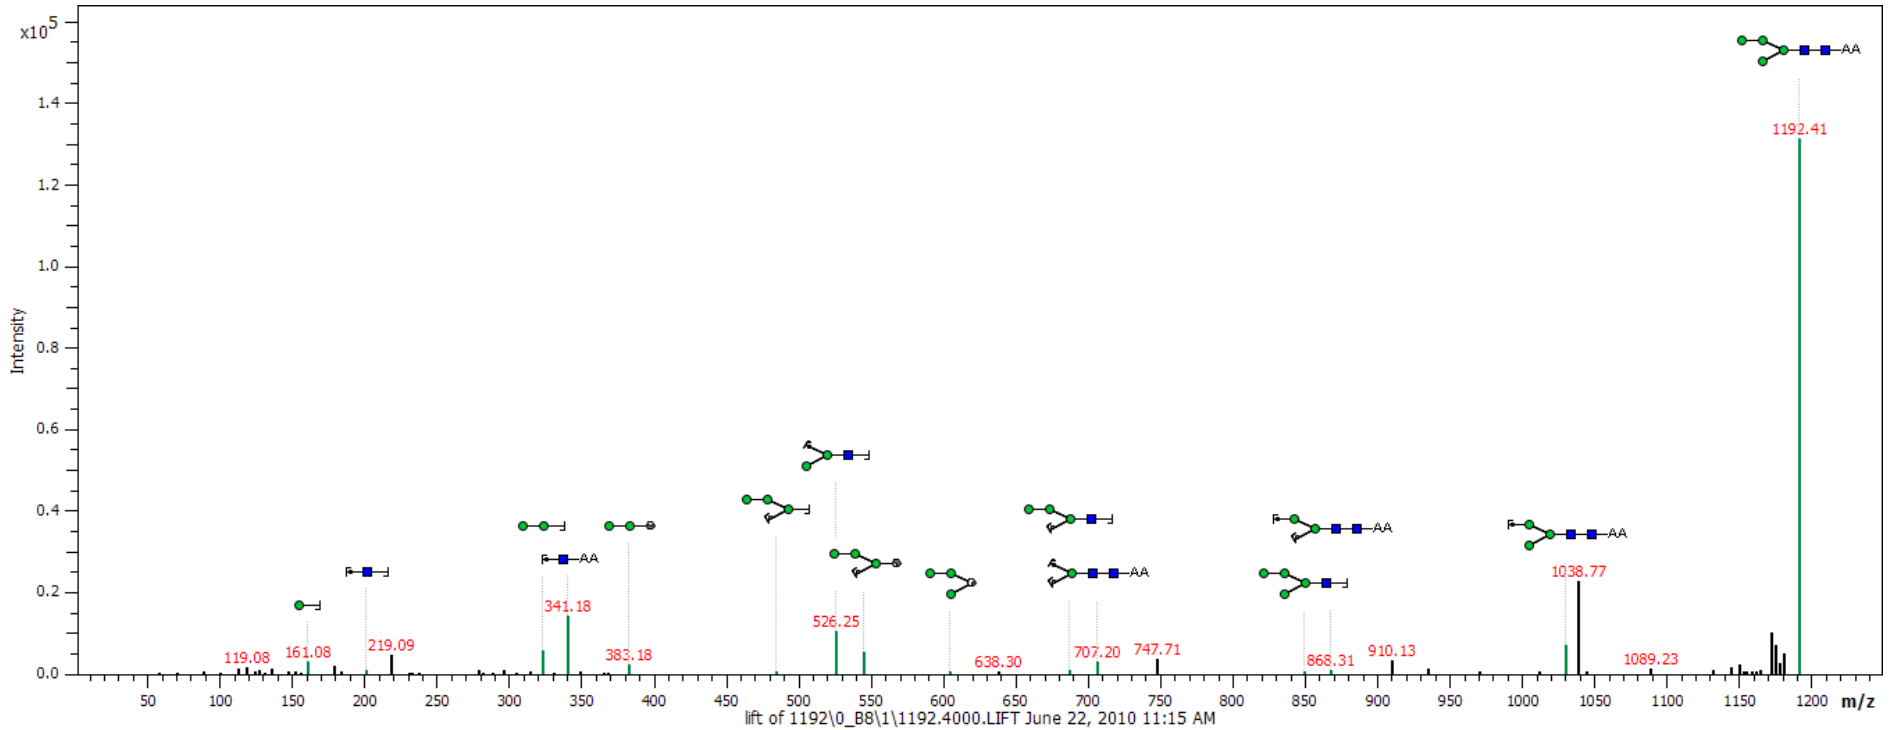

# Spectrum 9



## Glycan Search Report

Glycan: 3



Project path: /N-glycans cancer/25140/comp\_25140.mgf

MS data: K:/Cancer-CCR/N-glycans raw data\_MS/LC-MS of the discriminators/25140\_01.d/comp\_25140.mgf

Parent m/z: 597.7239 2+

Score: 50.347

Composition: Hex4HexNAc2-AA

Intensity coverage [%]: 0.85

Accession: 951

Fragment coverage [%]: 0.30

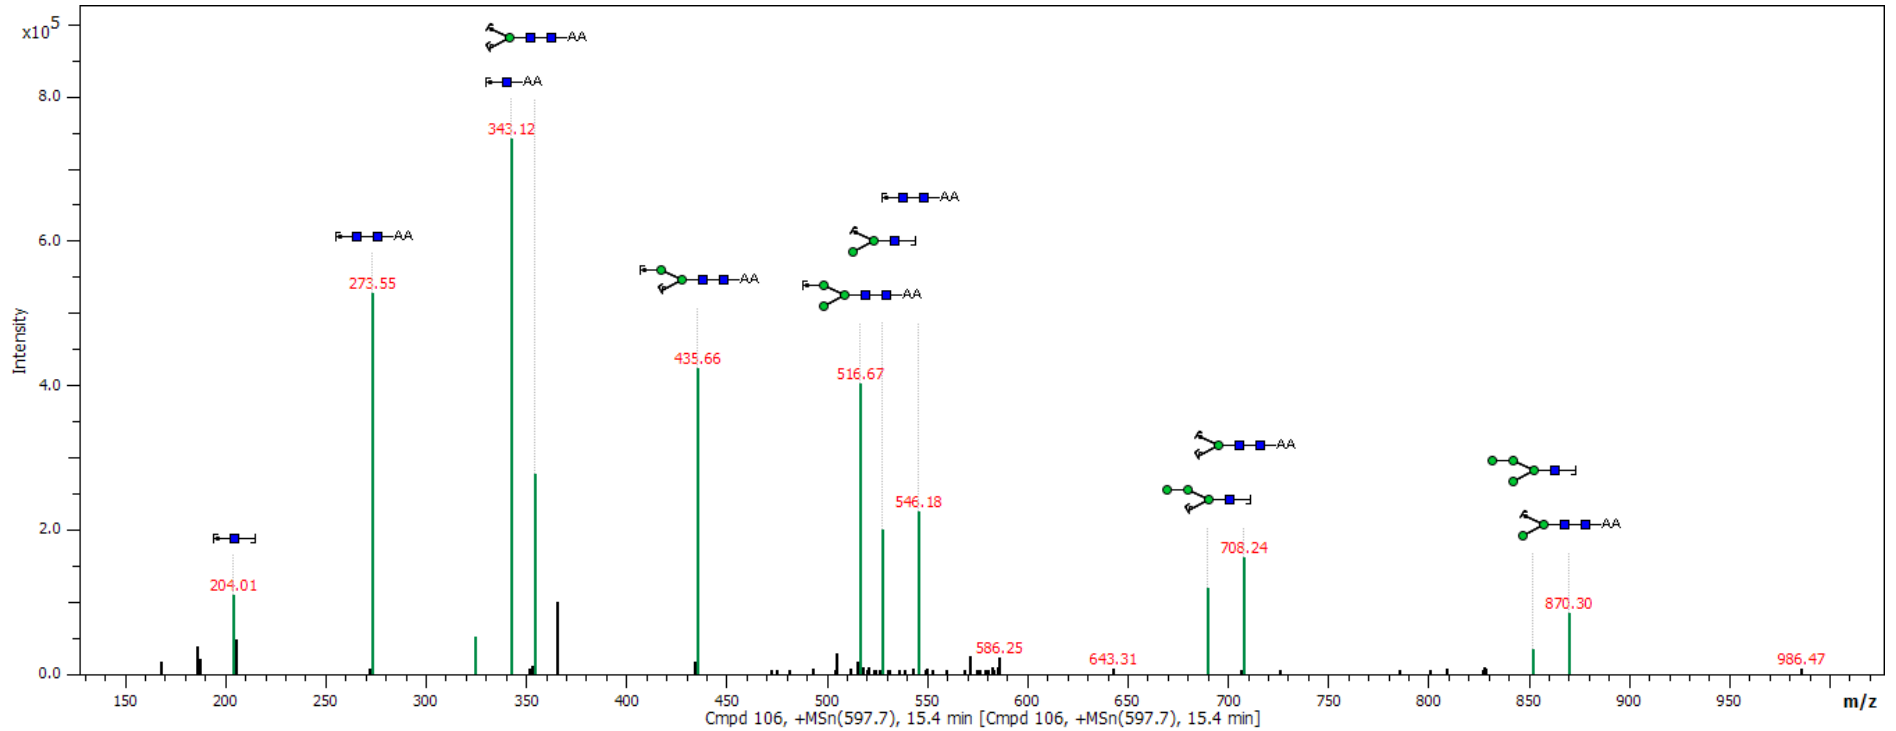

# Spectrum 10

Lift of 1217.4 [M-H]<sup>-</sup>  
dHex1Hex2HexNAc3-AA

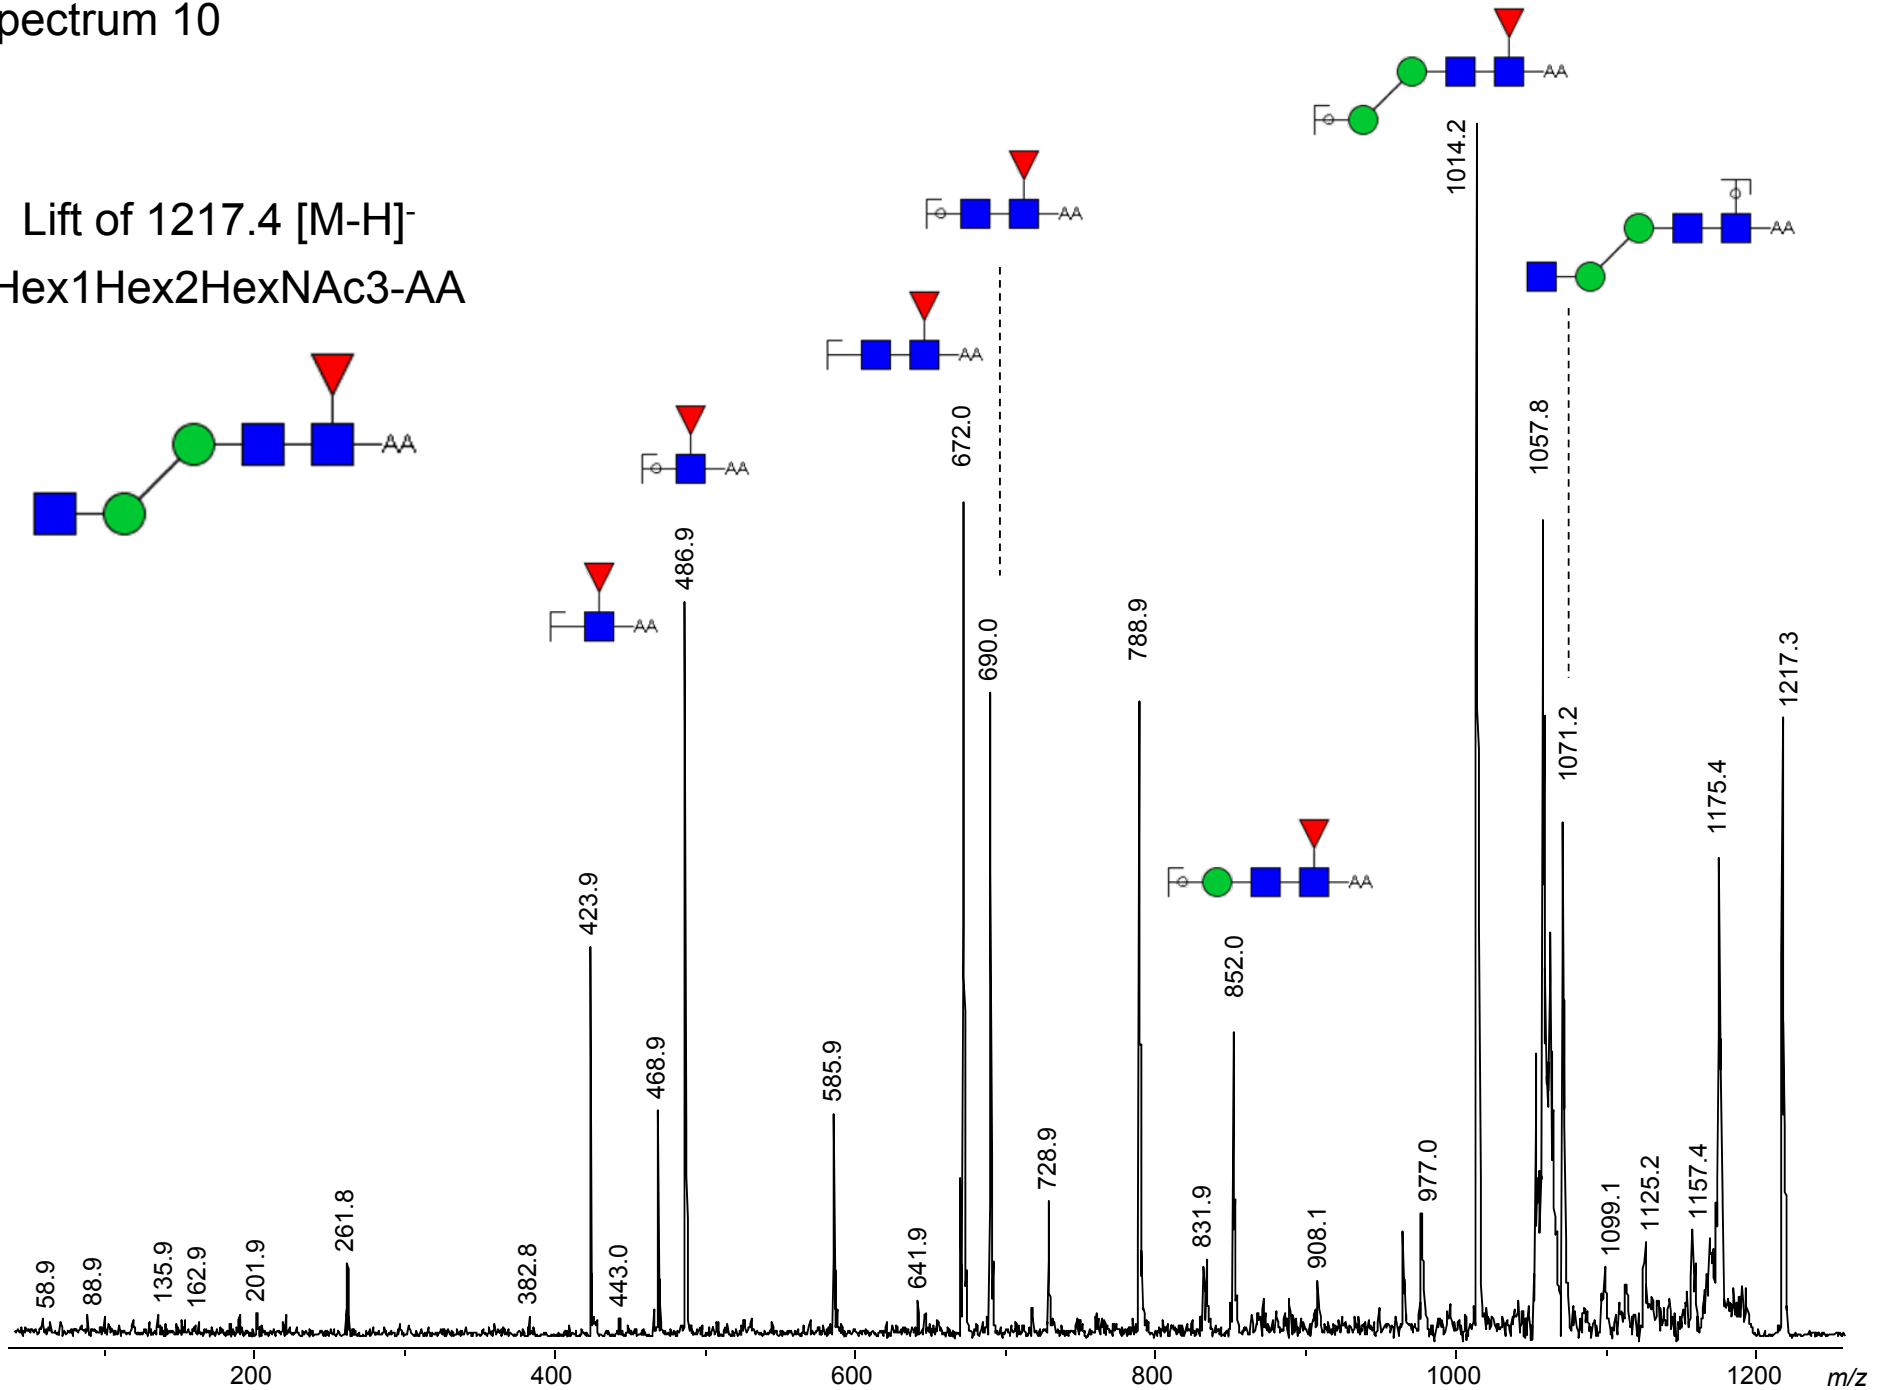

# Spectrum 11

Lift of 1233.3 [M-H]<sup>-</sup>

Hex3HexNAc3-AA

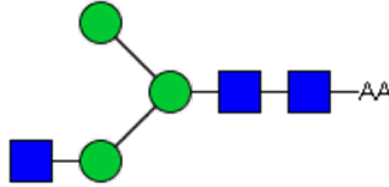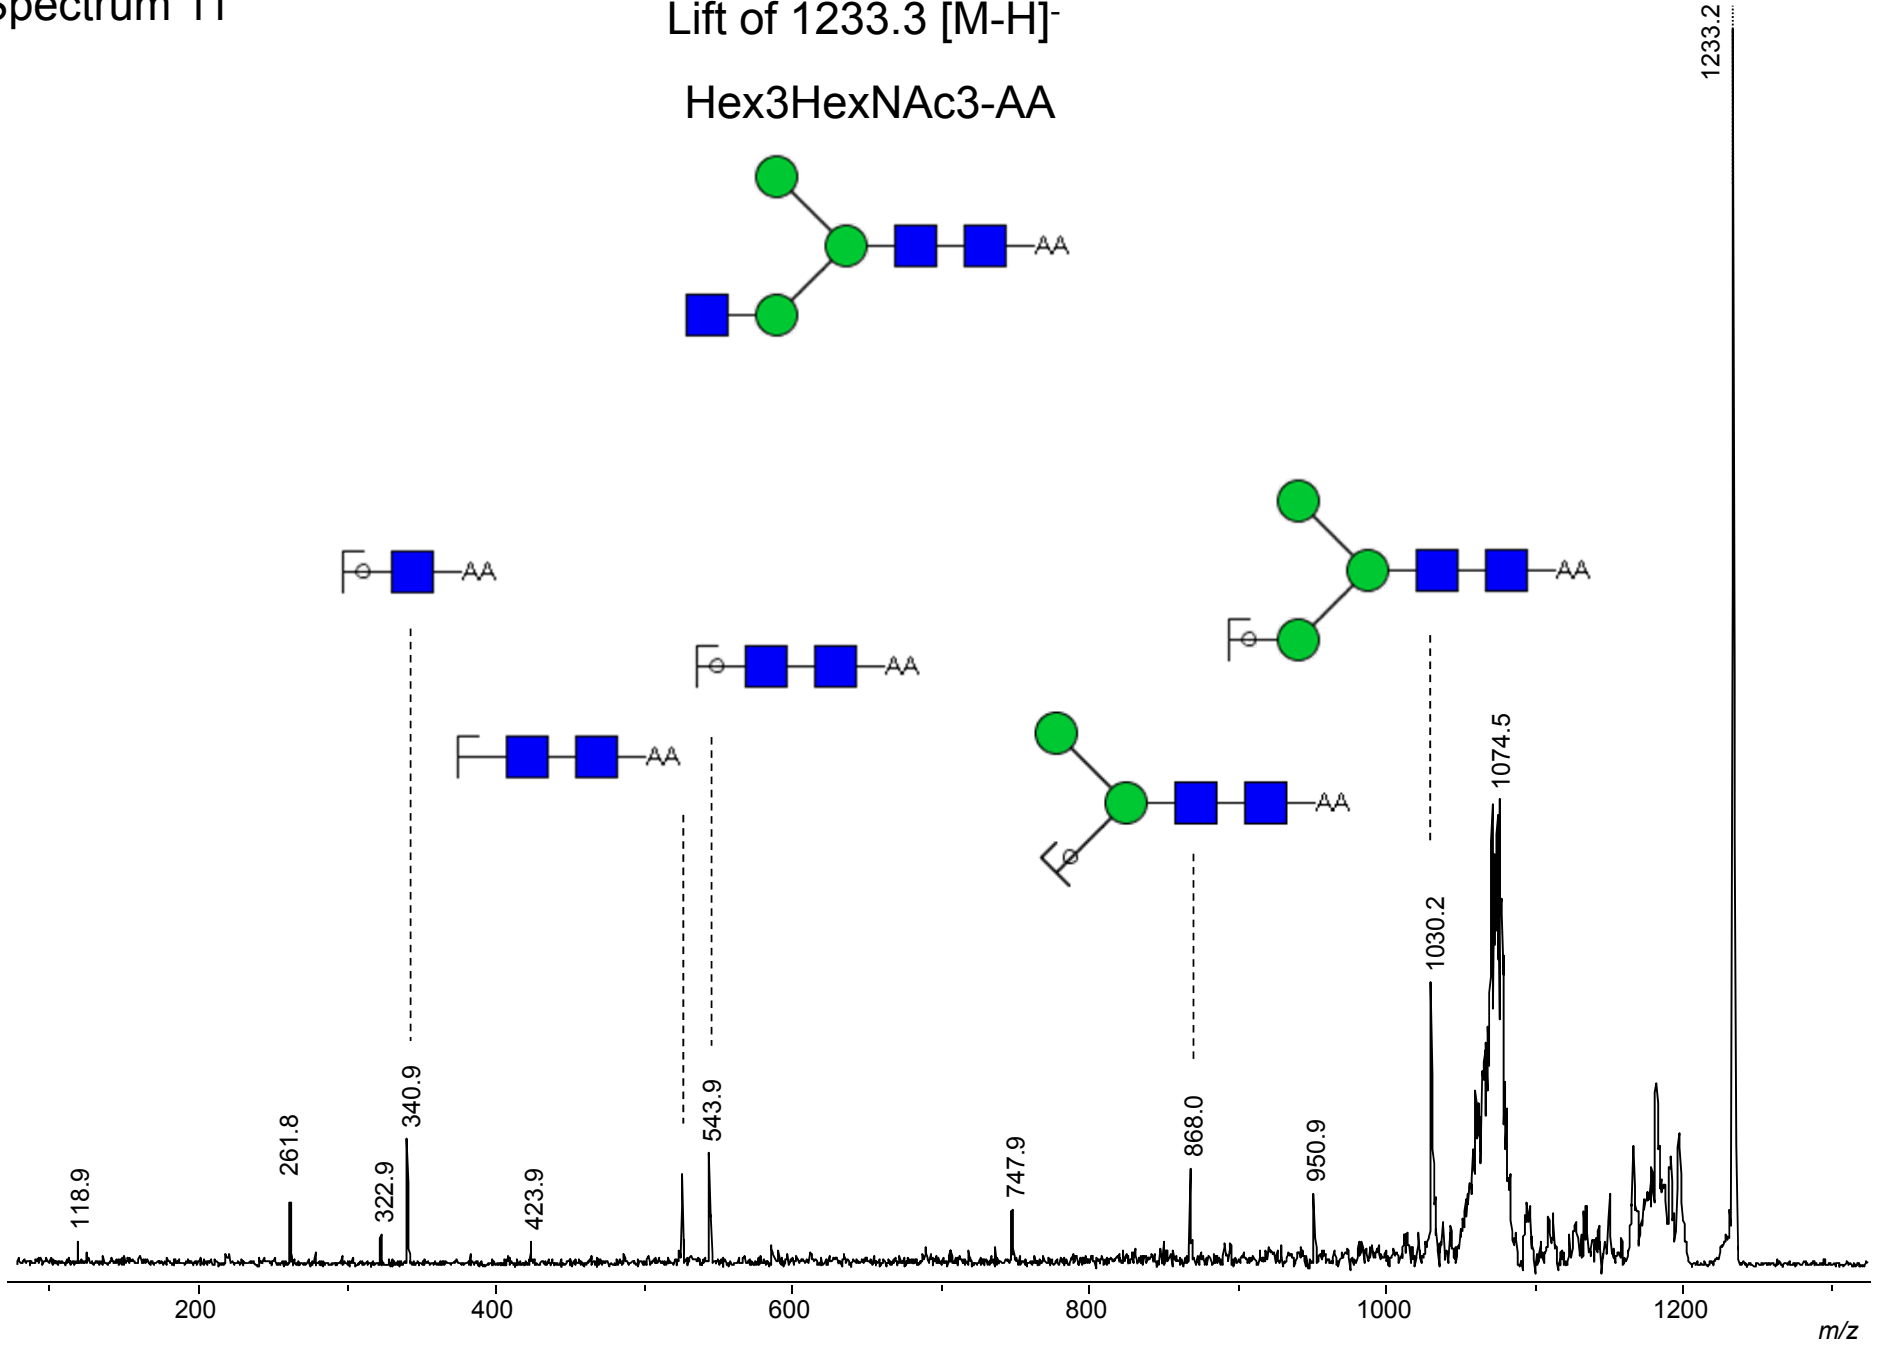

# Spectrum 12



## Glycan Search Report

Glycan: 2

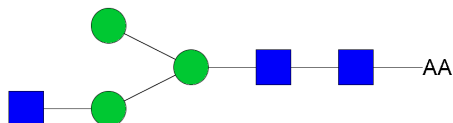

Project path: /N-glycans cancer/25144/comp\_25144.mgf

MS data: K:/Cancer-CCR/N-glycans raw\_data\_MS/LC-MS of the discriminators/25144\_01.d/comp\_25144.mgf

Parent m/z: 618.2372 2+

Score: 48.973

Composition: Hex3HexNAc3-AA

Intensity coverage [%]: 0.80

Accession: 1014

Fragment coverage [%]: 0.30

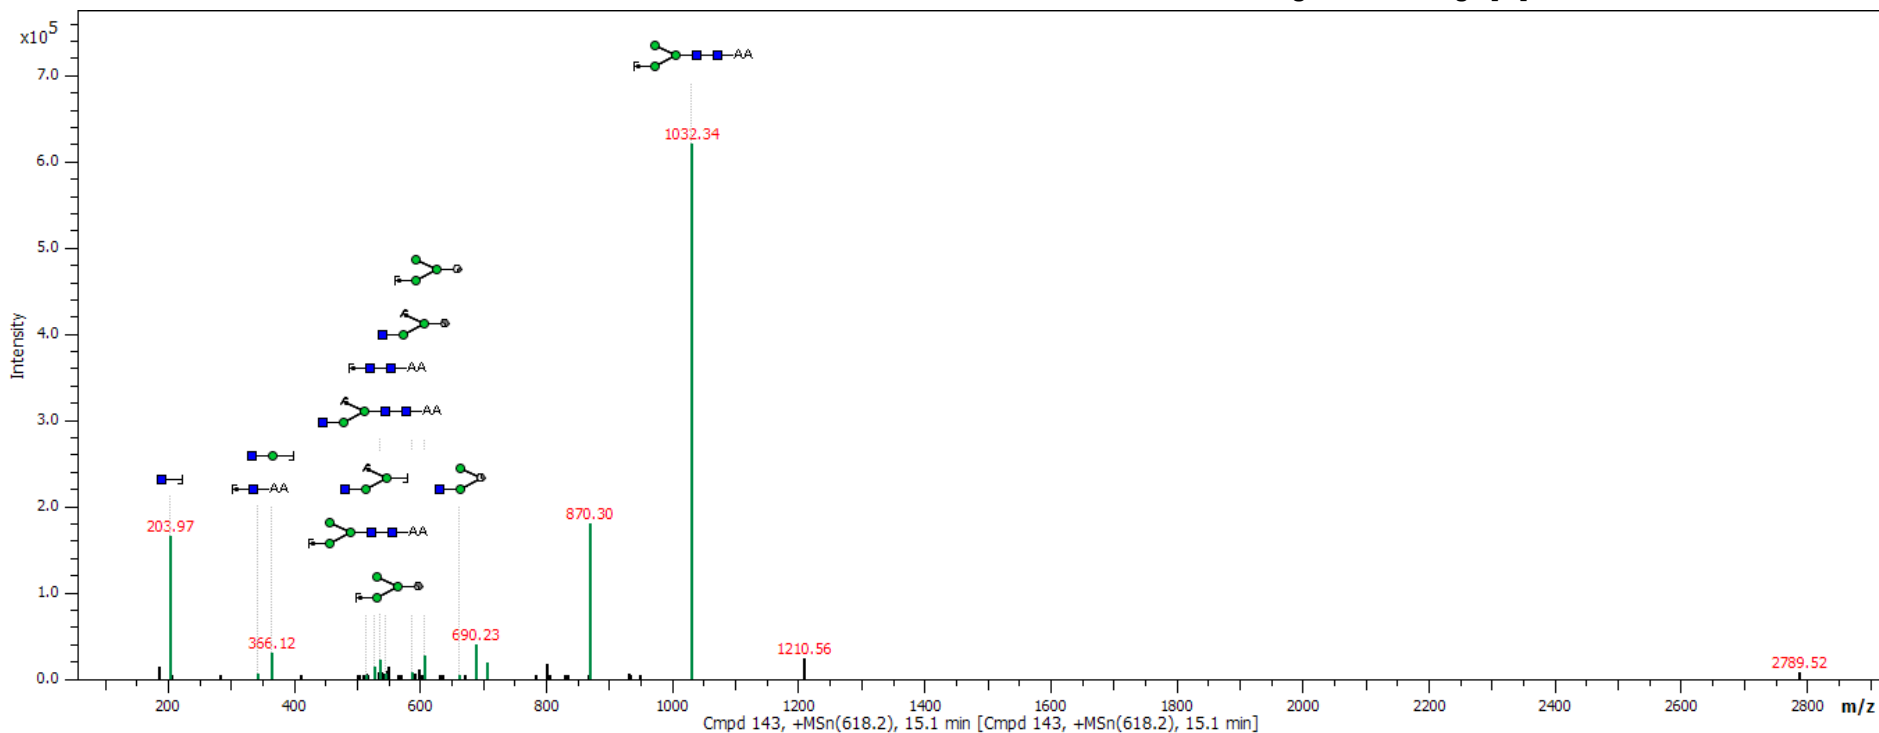

# Spectrum 13

Lift of 1272.3 [M-H]<sup>-</sup>  
S1Hex4HexNAc2-AA

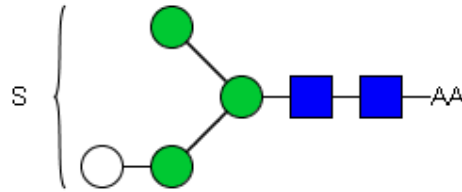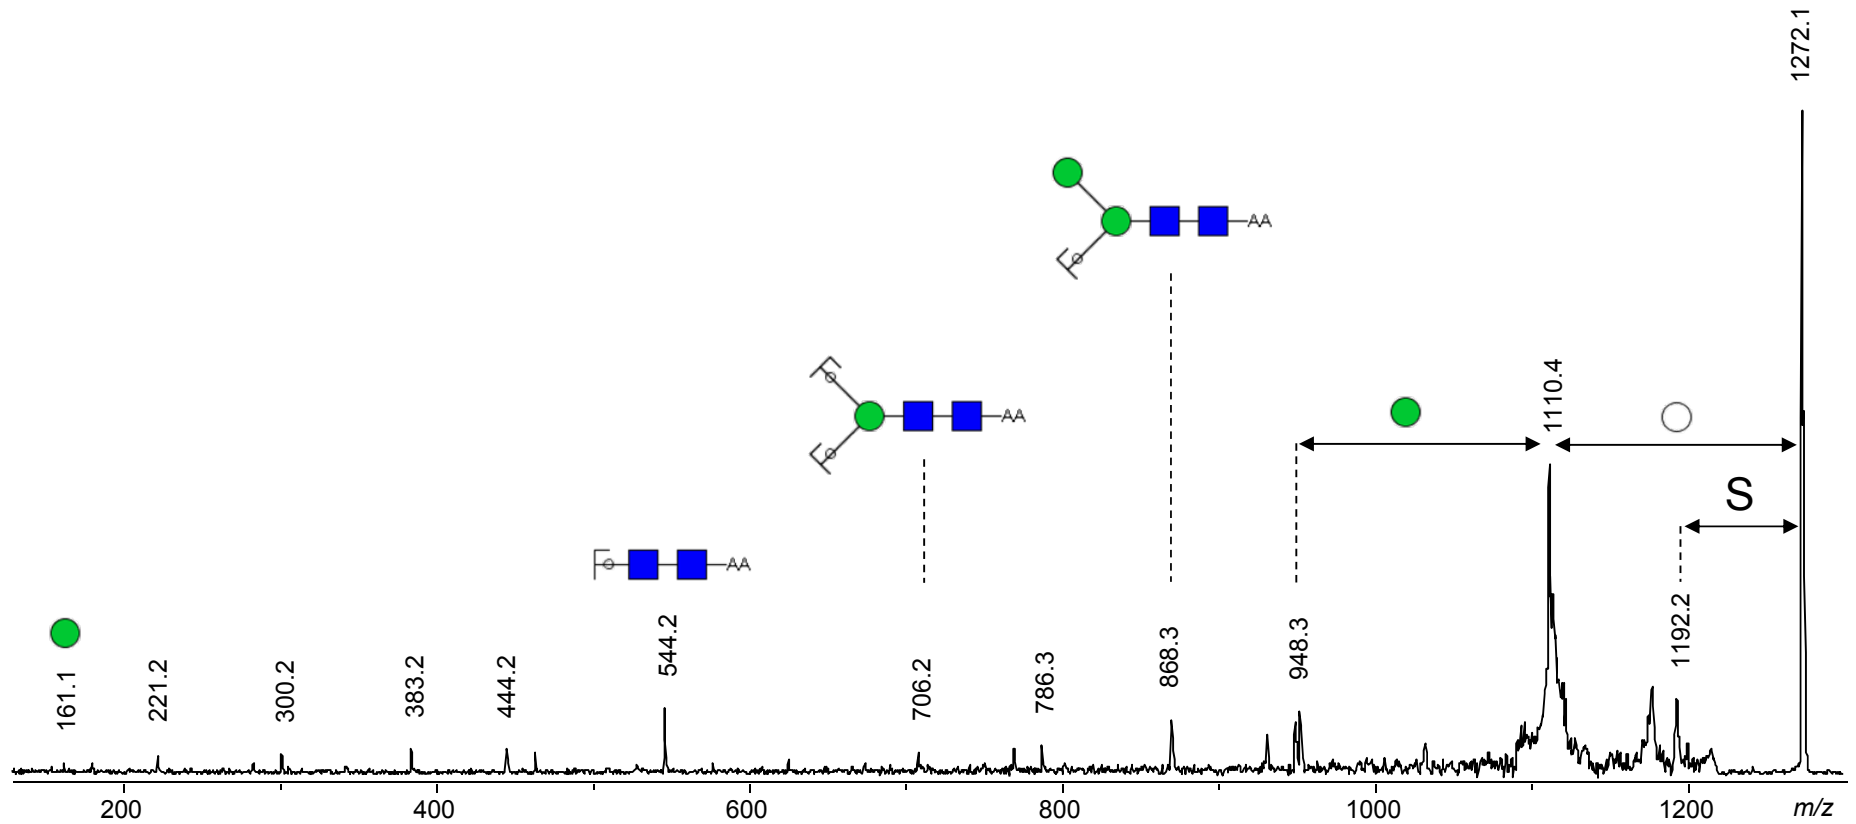

# Spectrum 14

Lift of 1238.4 [M-H]<sup>-</sup>

dHex1Hex4HexNAc2-AA

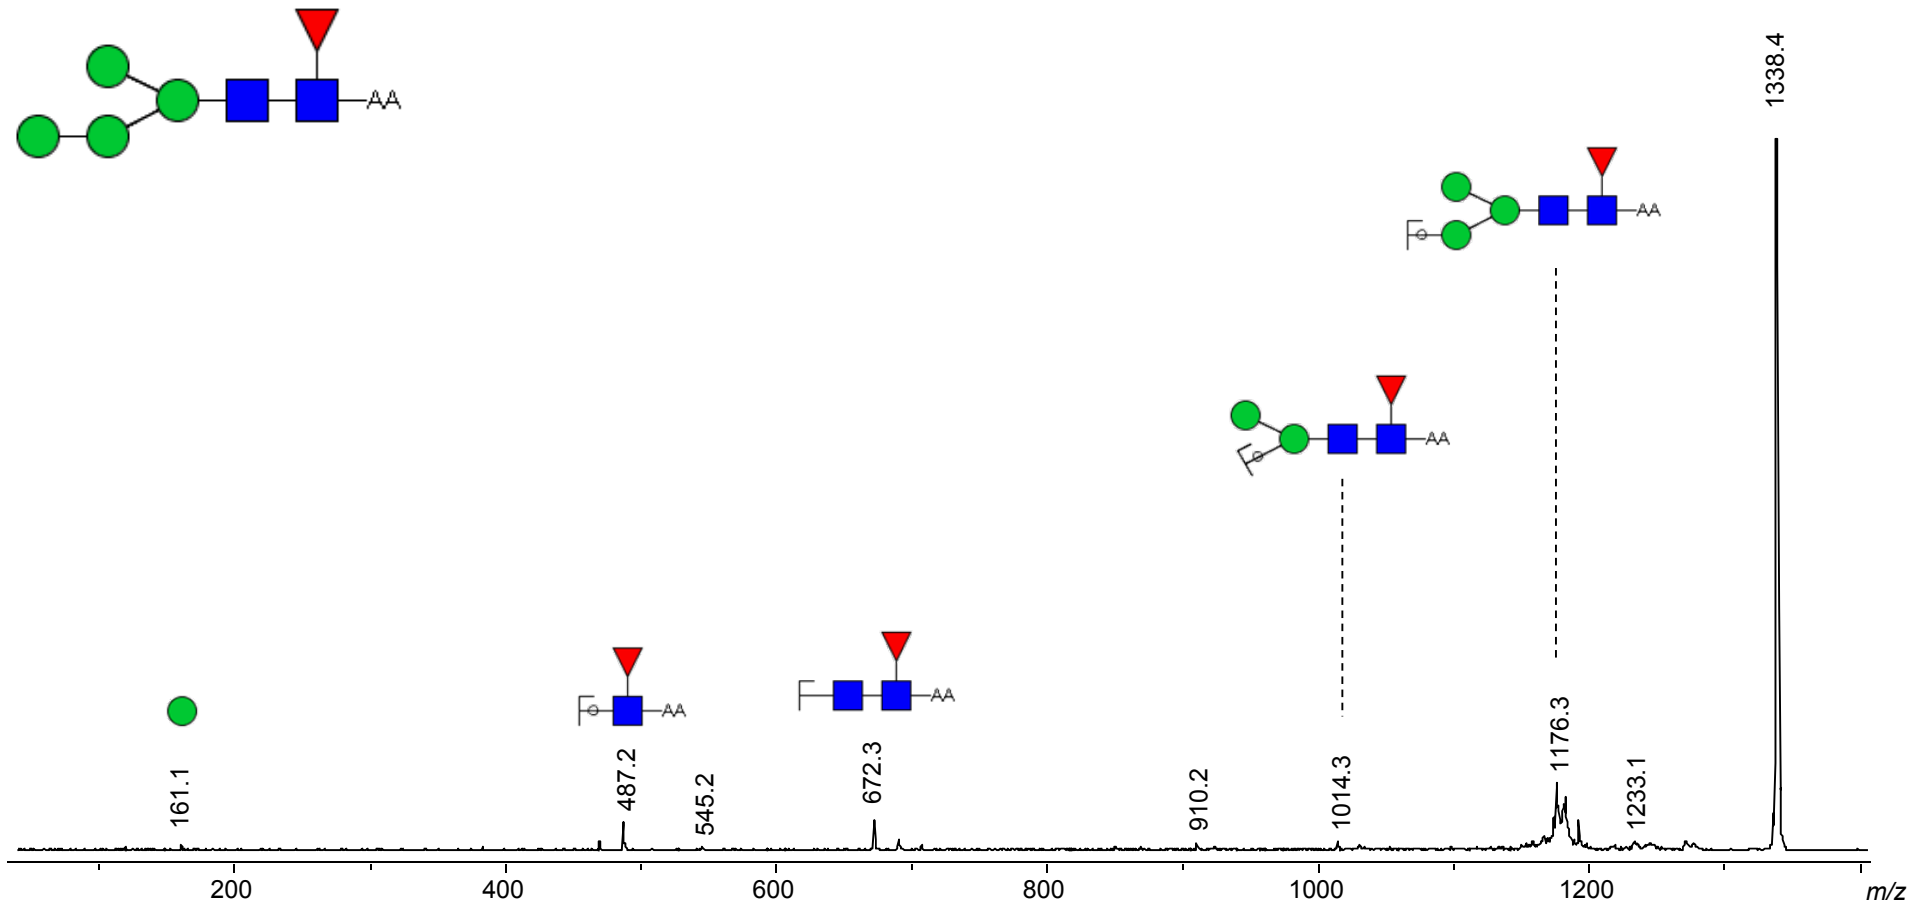



# Spectrum 15

## Glycan Search Report

Glycan: 5

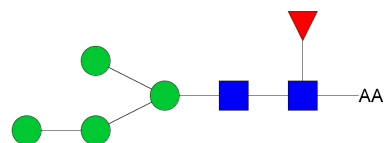

**Project path:** /N-glycans cancer/25146/comp\_25146.mgf

**MS data:** K:/Cancer-CCR/N-glycans raw data\_MS/LC-MS of the discriminators/25146\_02.d/comp\_25146.mgf

**Parent m/z:** 670.7529 2+

**Score:** 39.194

**Composition:** Hex4HexNAc2dHex1-AA

**Intensity coverage [%]:** 0.55

**Accession:** 24432

**Fragment coverage [%]:** 0.28

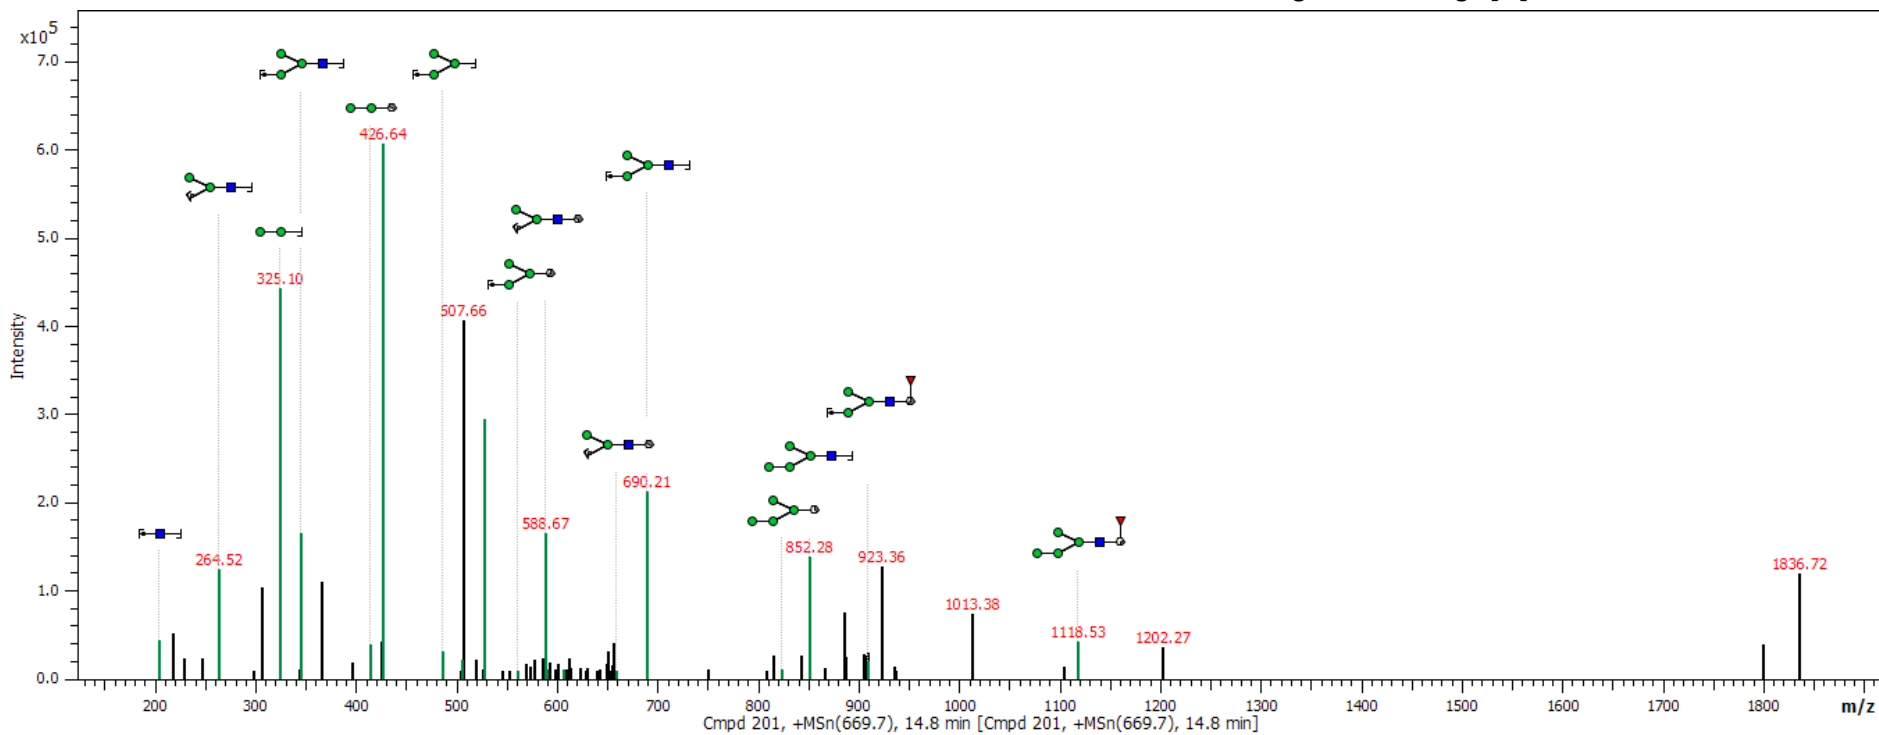



# Spectrum 16

Lift of 1354.5 [M-H]<sup>-</sup>  
Hex5HexNAc2-AA

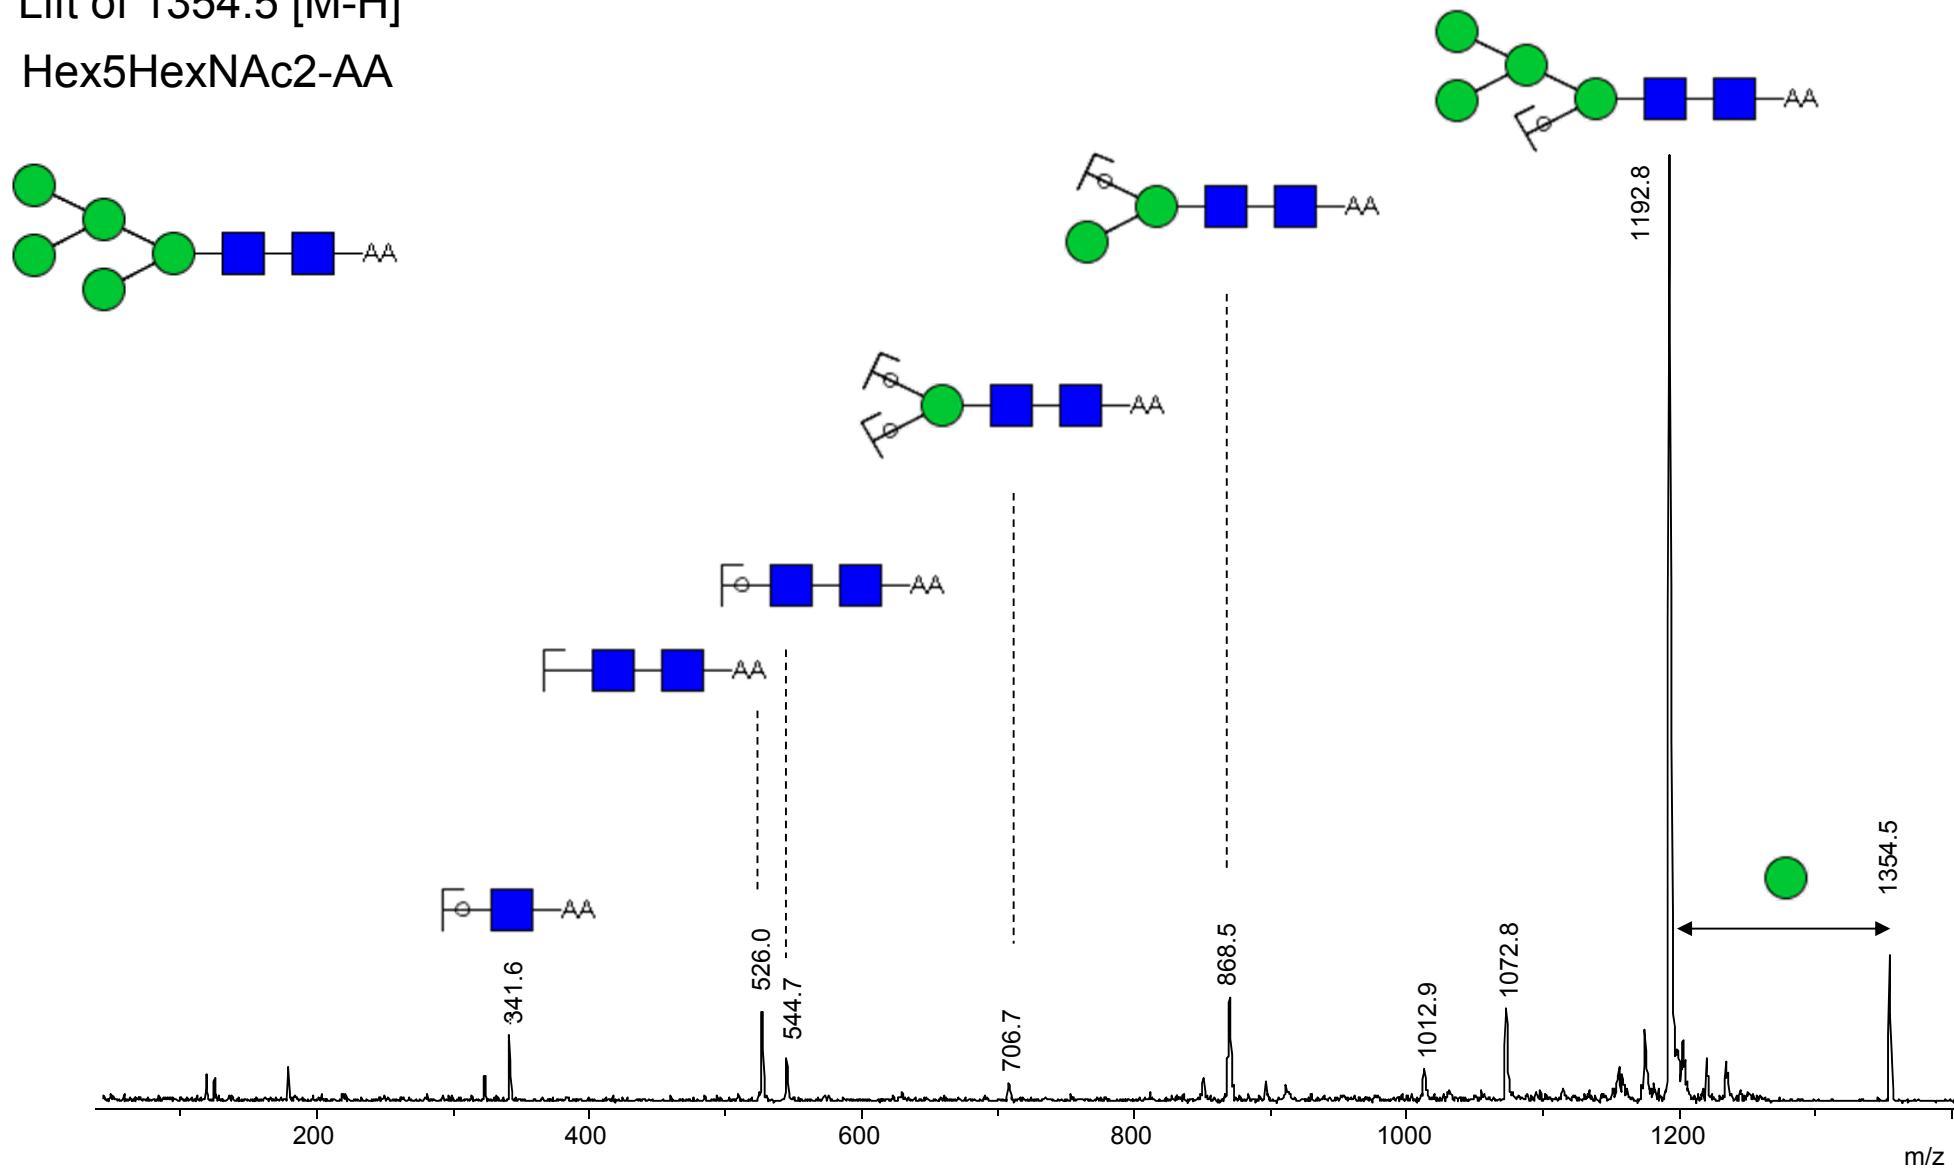

# Spectrum 17



## Glycan Search Report

Glycan: 1

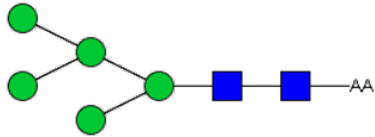

**Project path:** /N-glycans cancer/25142/comp\_25142\_01.mgf

**MS data:** K:/Cancer-CCR/N-glycans raw data\_MS/LC-MS of the discriminators/25142\_01.d/comp\_25142\_01.mgf

**Parent m/z:** 678.7503 2+

**Score:** 84.572

**Composition:** Hex5HexNAc2-AA

**Intensity coverage [%]:** 0.72

**Accession:** 36312

**Fragment coverage [%]:** 1.00

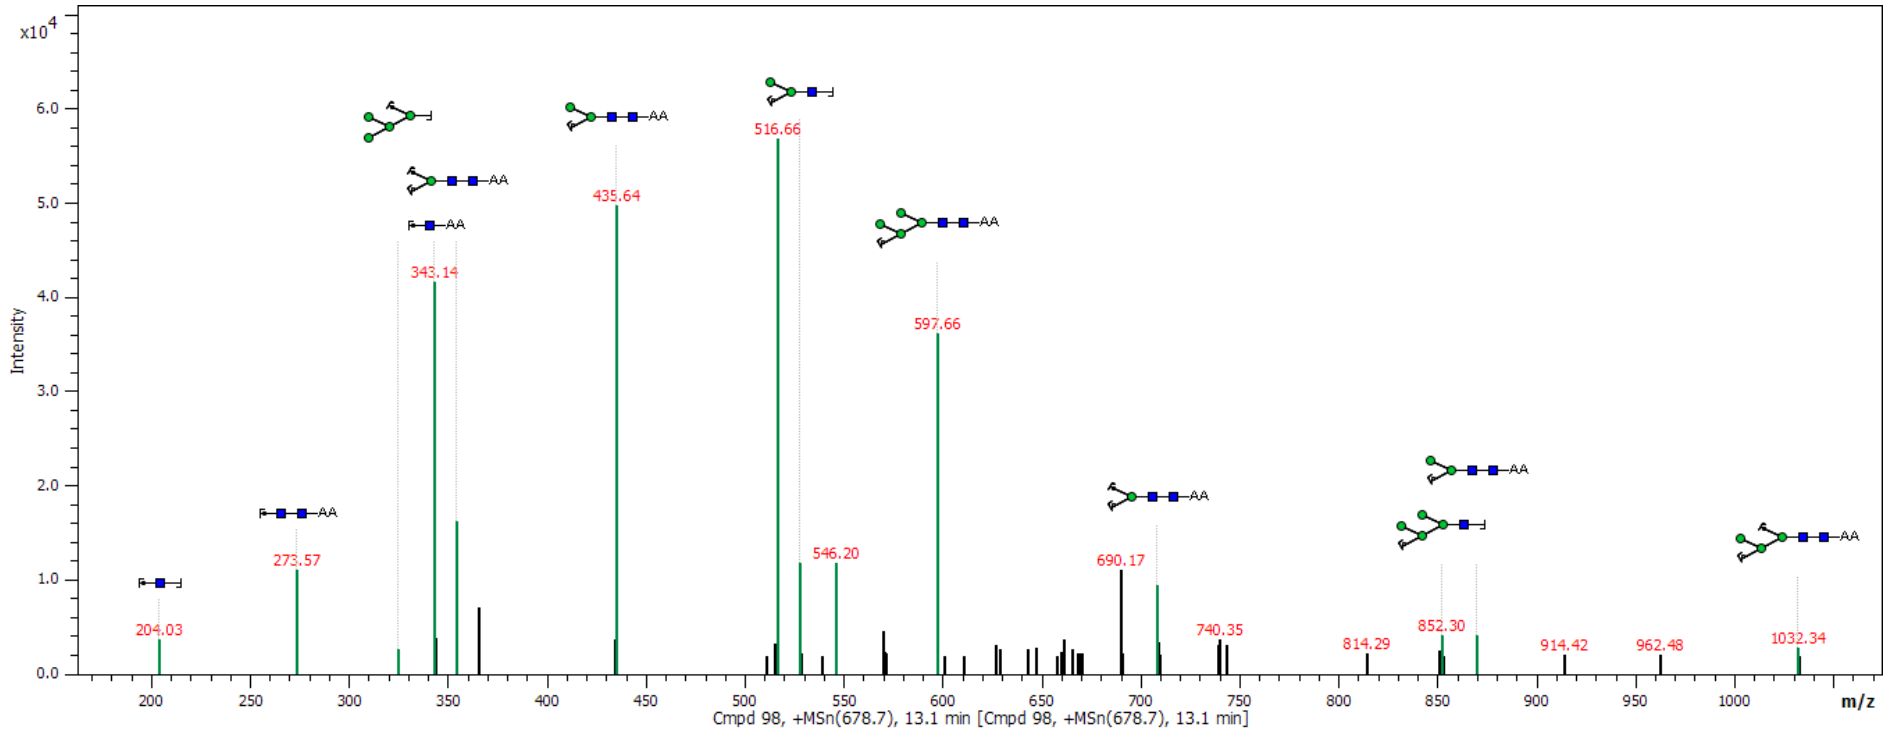

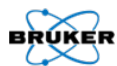

# Spectrum 18

## Glycan Search Report

Glycan: 4

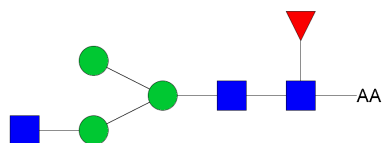

**Project path:** /N-glycans cancer/Lift spectra/CombinedLIFT  
**MS data:** c:/documents and settings/ciabalog/desktop/new folder/lift of 1379\_fraction59/0\_c24/1/1379.0000.lift/1sref/pdata/1/1r  
**Parent m/z:** 1379.5105 -1 **Score:** 61.330  
**Composition:** Hex3HexNAc3dHex1-AA **Intensity coverage [%]:** 0.53  
**Accession:** 36110 **Fragment coverage [%]:** 0.71

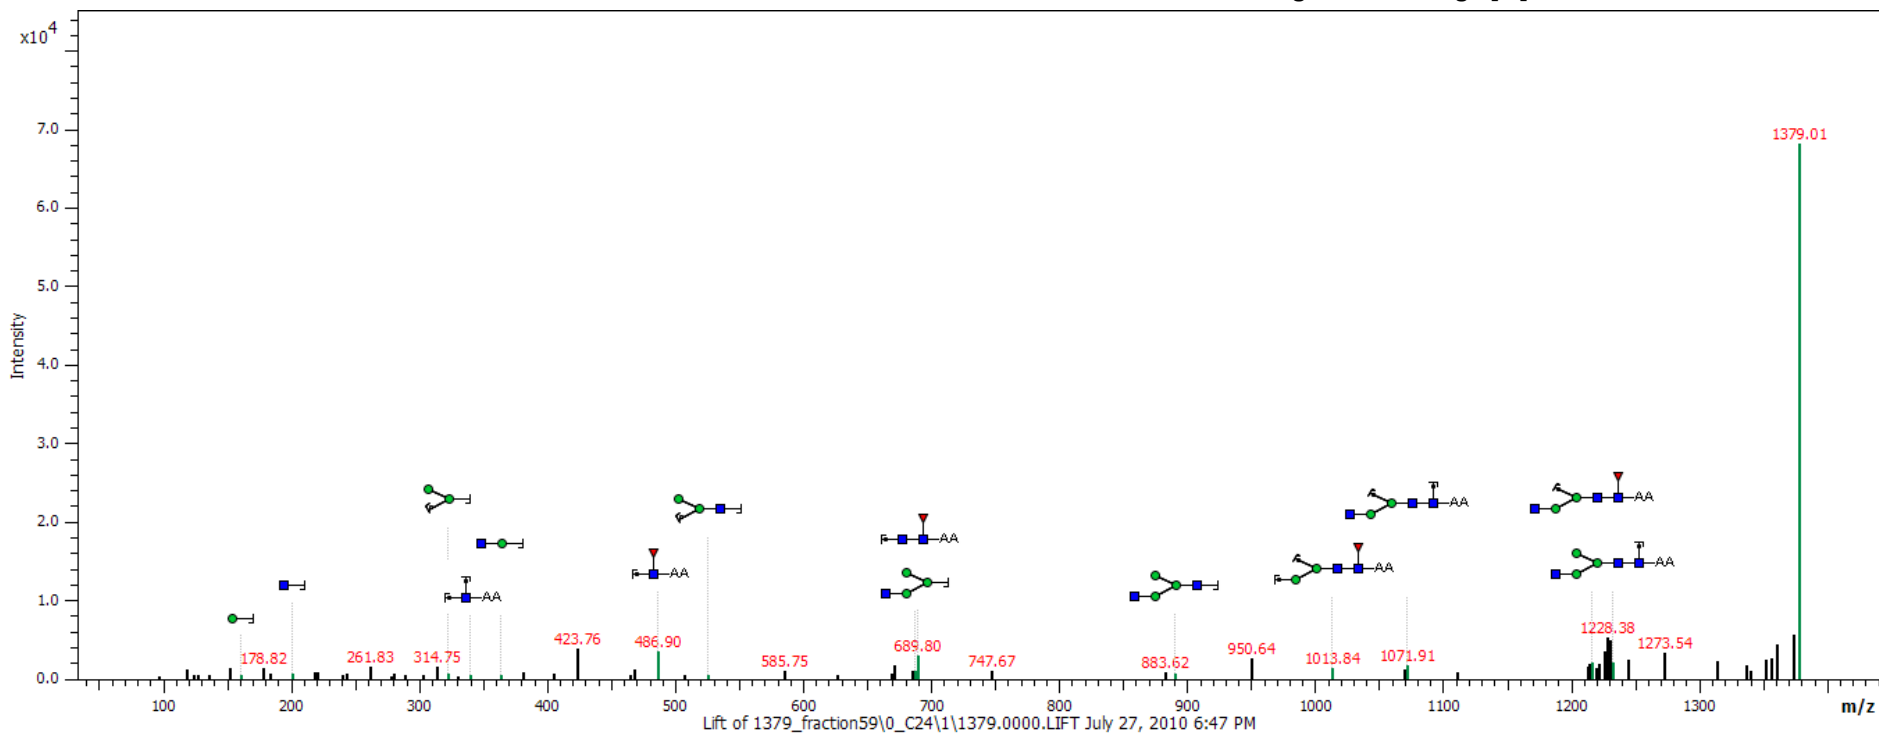



# Spectrum 19

## Glycan Search Report

Glycan: 2

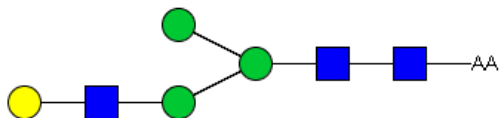

**Project path:** /N-glycans cancer/25146/comp\_25146.mgf

**MS data:** K:/Cancer-CCR/N-glycans raw data\_MS/LC-MS of the discriminators/25146\_02.d/comp\_25146.mgf

**Parent m/z:** 699.2636 2+

**Score:** 71.904

**Composition:** Hex4HexNAc3-AA

**Intensity coverage [%]:** 0.85

**Accession:** 36335

**Fragment coverage [%]:** 0.61

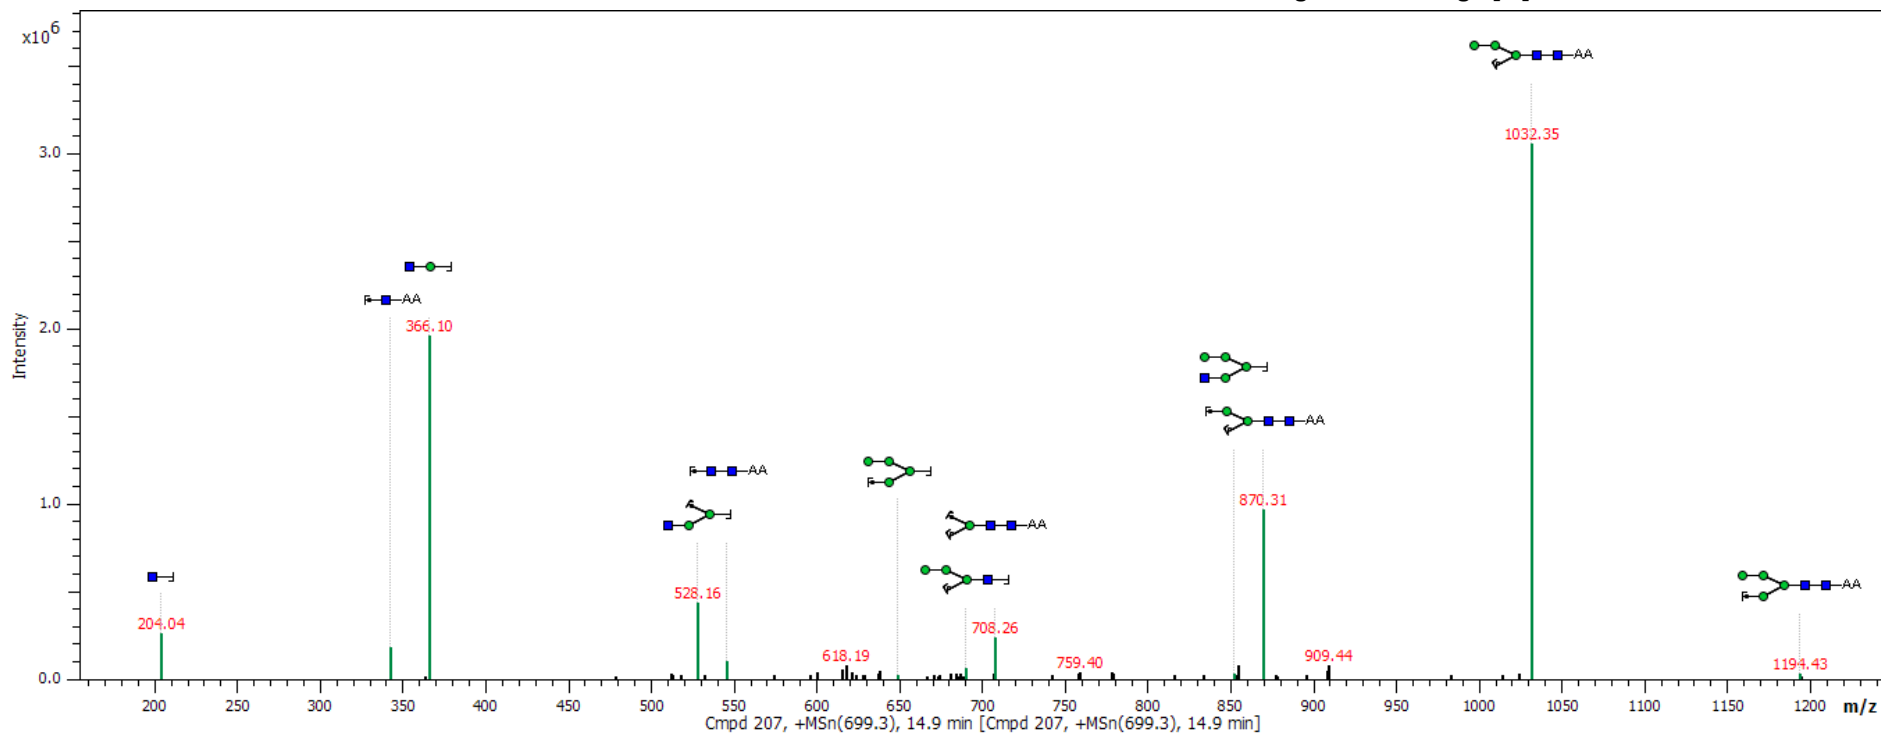

# Spectrum 20

Lift of 1436.5 [M-H]<sup>-</sup>  
Hex3HexNAc4-AA

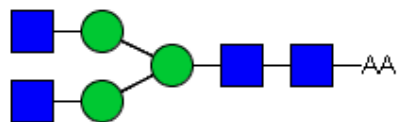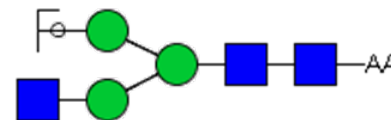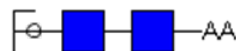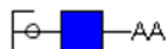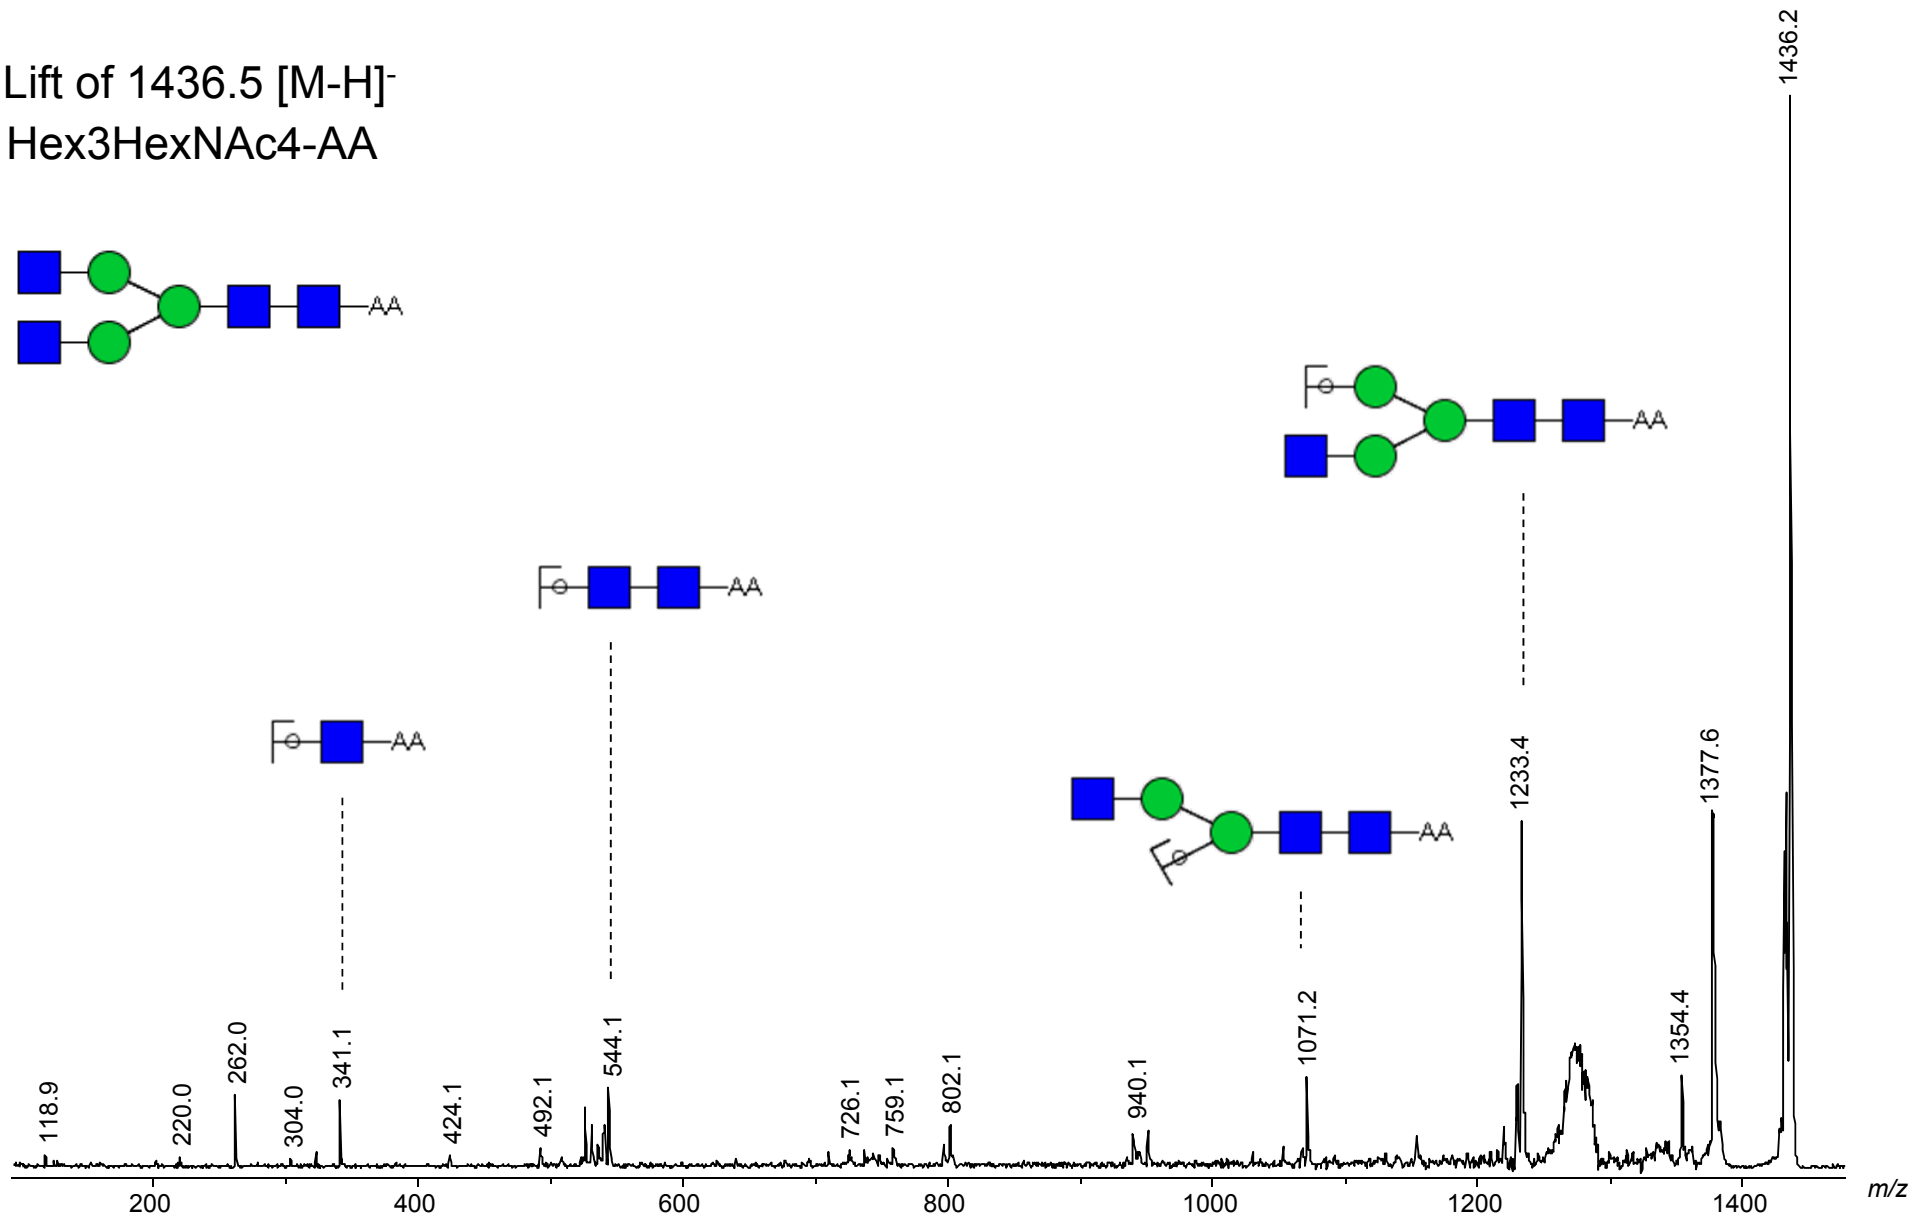

# Spectrum 21

Lift of 1459.4 [M-H]<sup>-</sup>  
S1dHex1Hex3HexNAc3-AA

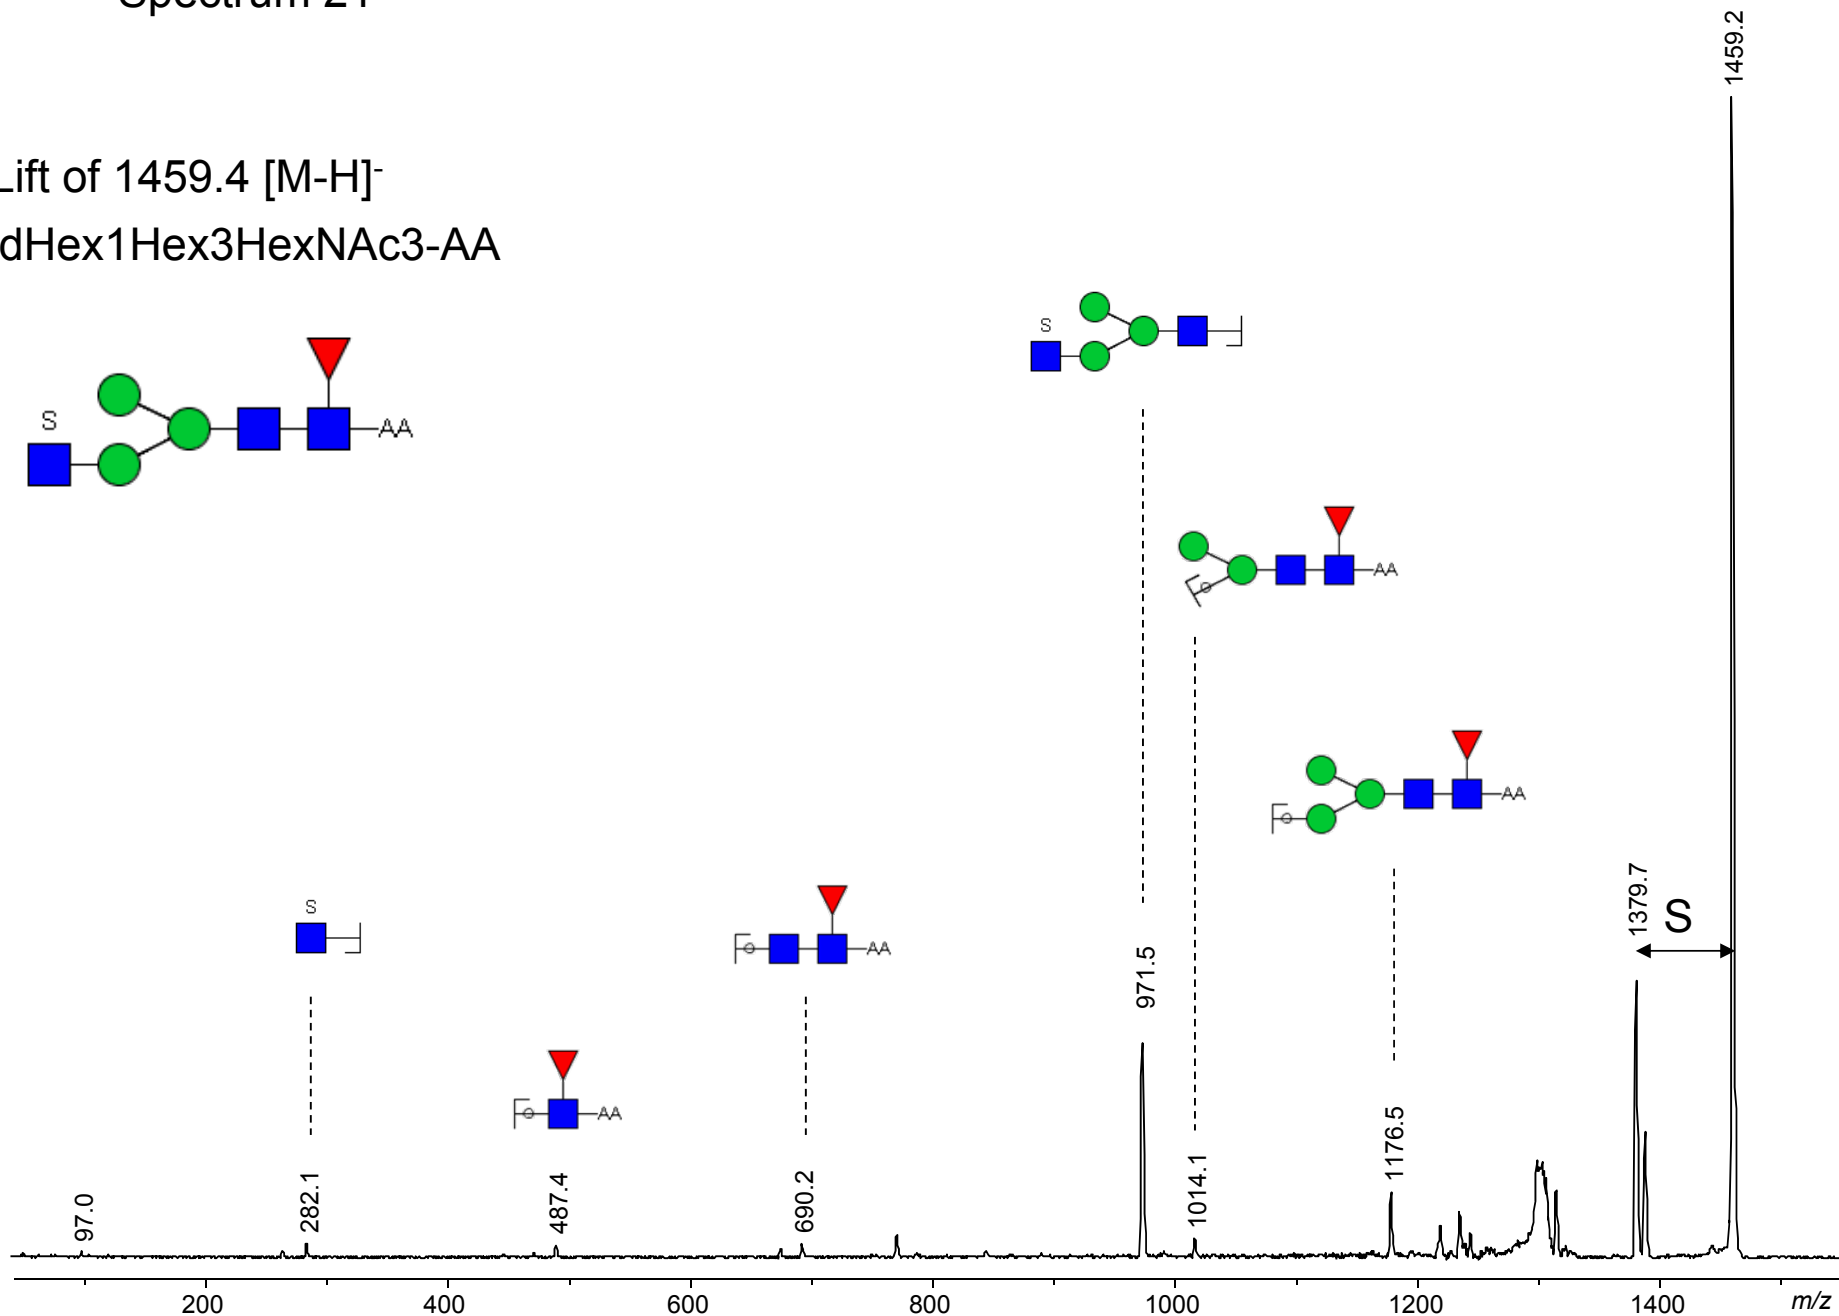

# Spectrum 22

ESI MS/MS of 731.5 [M+2H]<sup>2+</sup>  
S1dHex1Hex3HexNAc3-AA

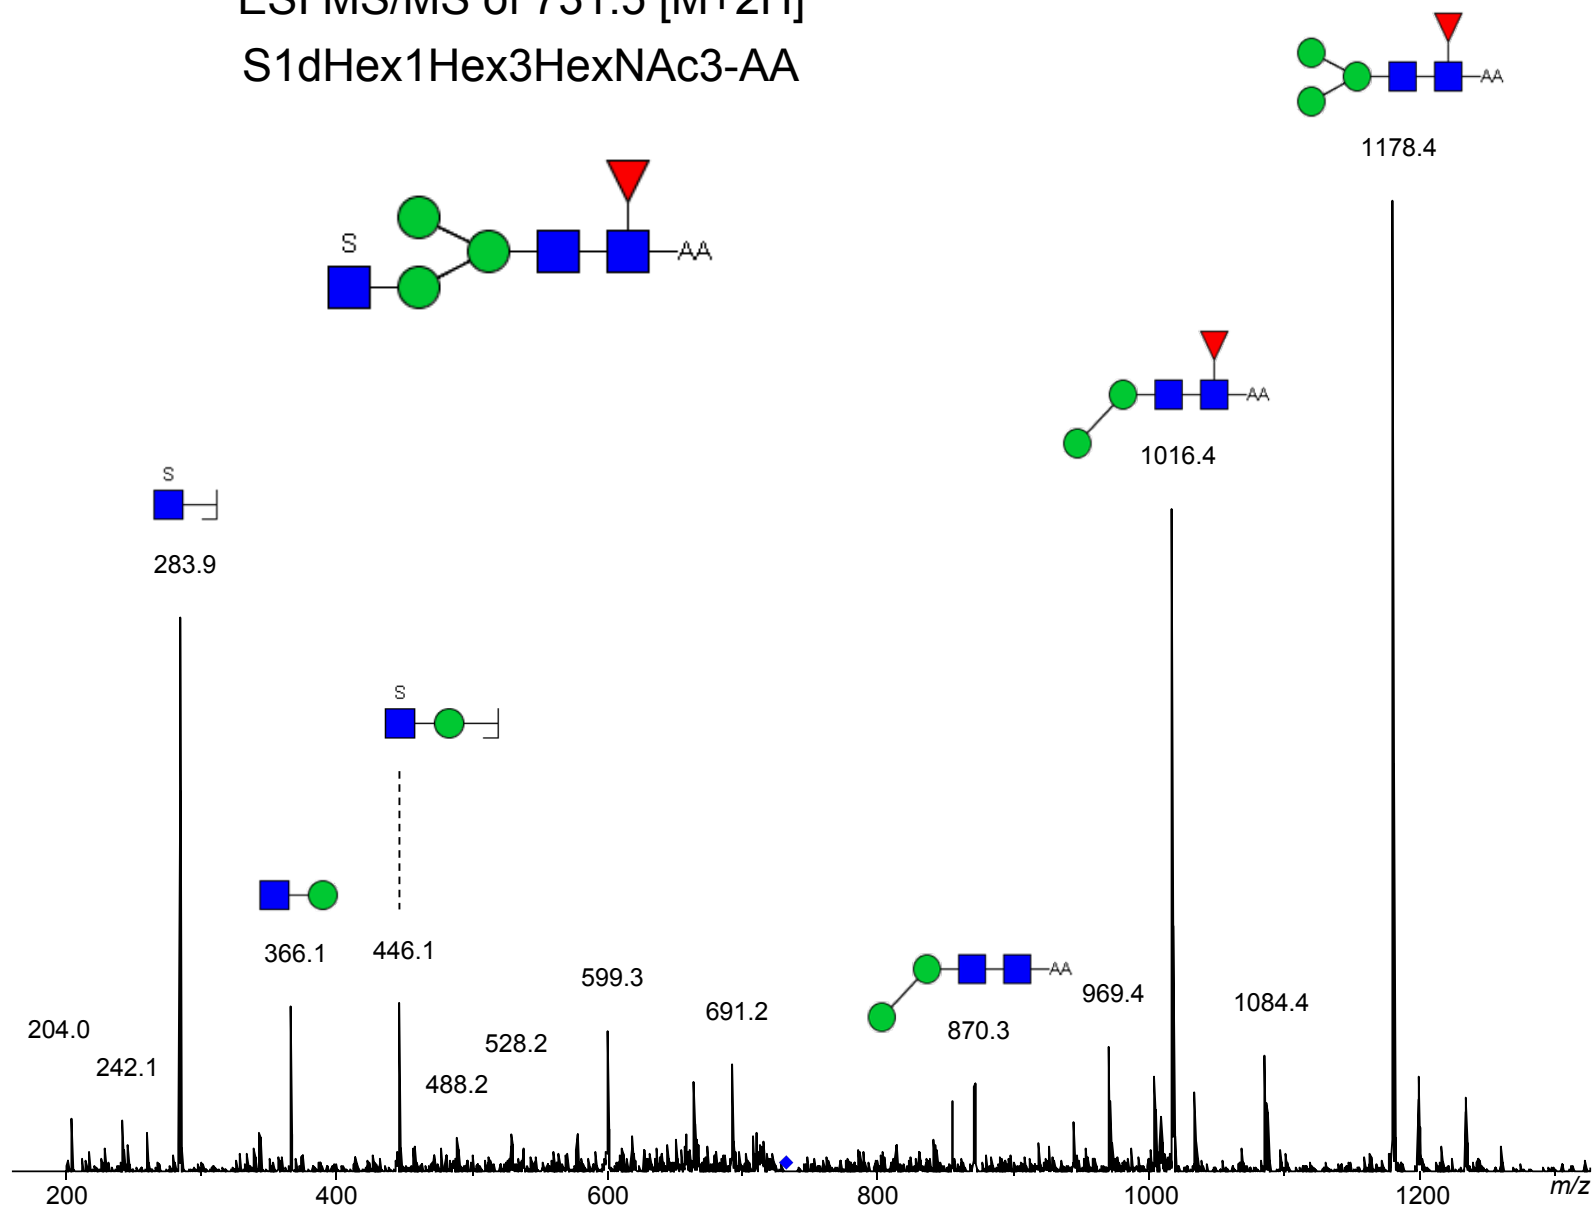

# Spectrum 23

Lift of 1500.5 [M-H]<sup>-</sup>  
dHex1Hex5HexNAc2-AA

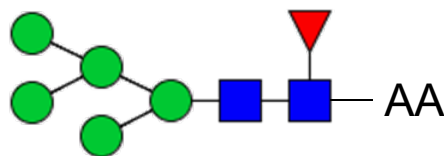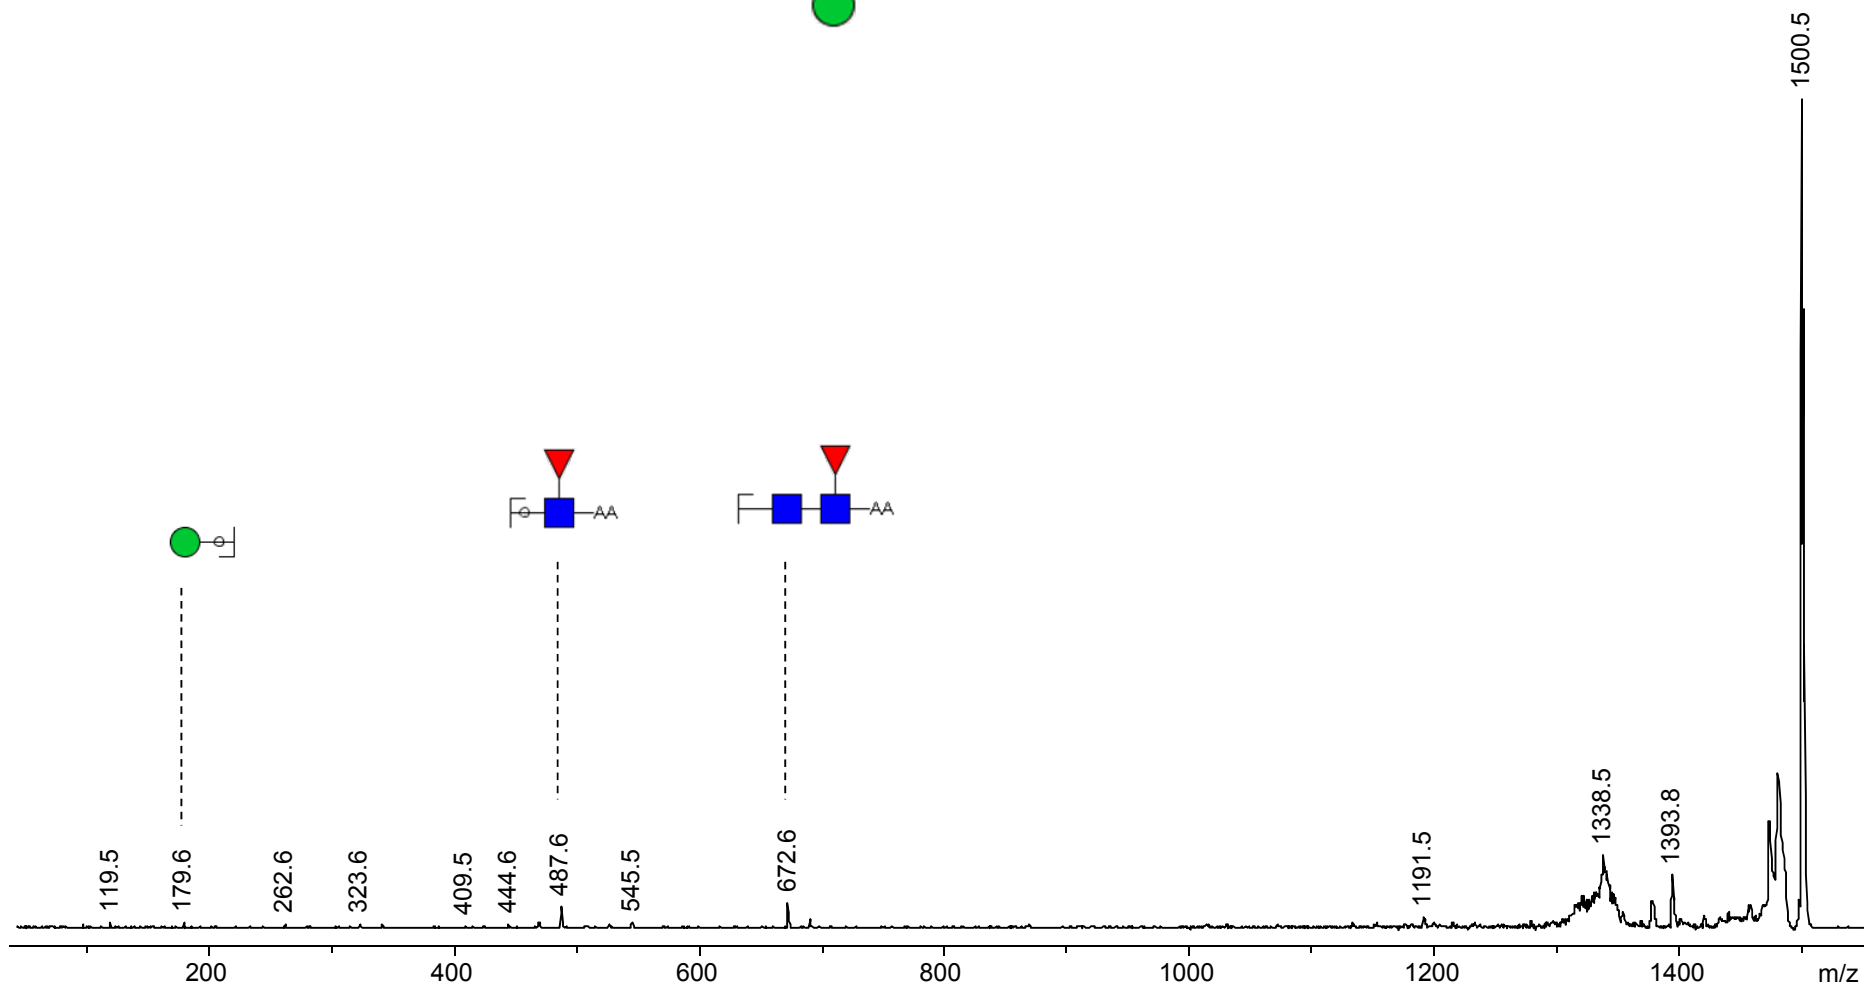



# Spectrum 24

ESI MS/MS of  $[751.9 + 2H]^{2+}$   
dHex1Hex5HexNAc2-AA

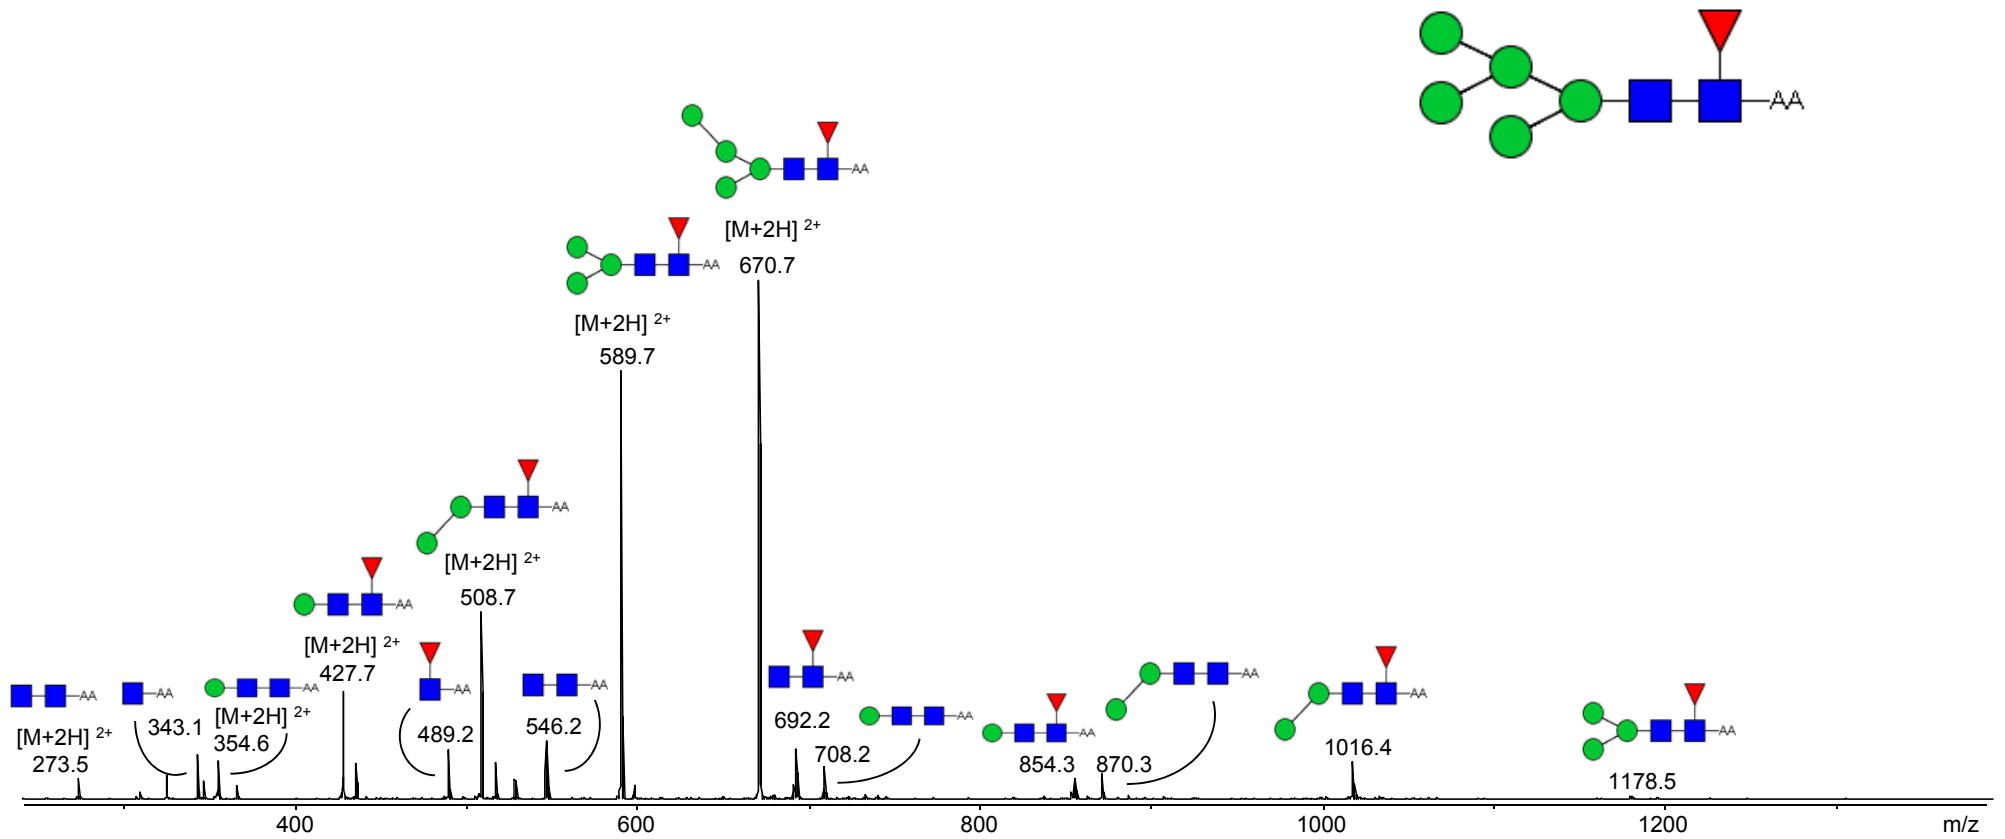



# Spectrum 24

## Glycan Search Report

Glycan: 5

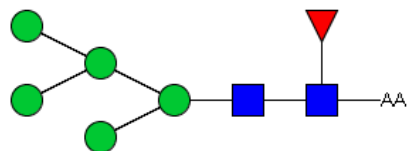

**Project path:** /N-glycans cancer/25141/comp\_25141.mgf

**MS data:** K:/Cancer-CCR/N-glycans raw data\_MS/LC-MS of the discriminators/25141\_01.d/comp\_25141.mgf

**Parent m/z:** 751.7793 2+

**Score:** 53.396

**Composition:** Hex5HexNAc2dHex1-AA

**Intensity coverage [%]:** 0.53

**Accession:** 36116

**Fragment coverage [%]:** 0.54

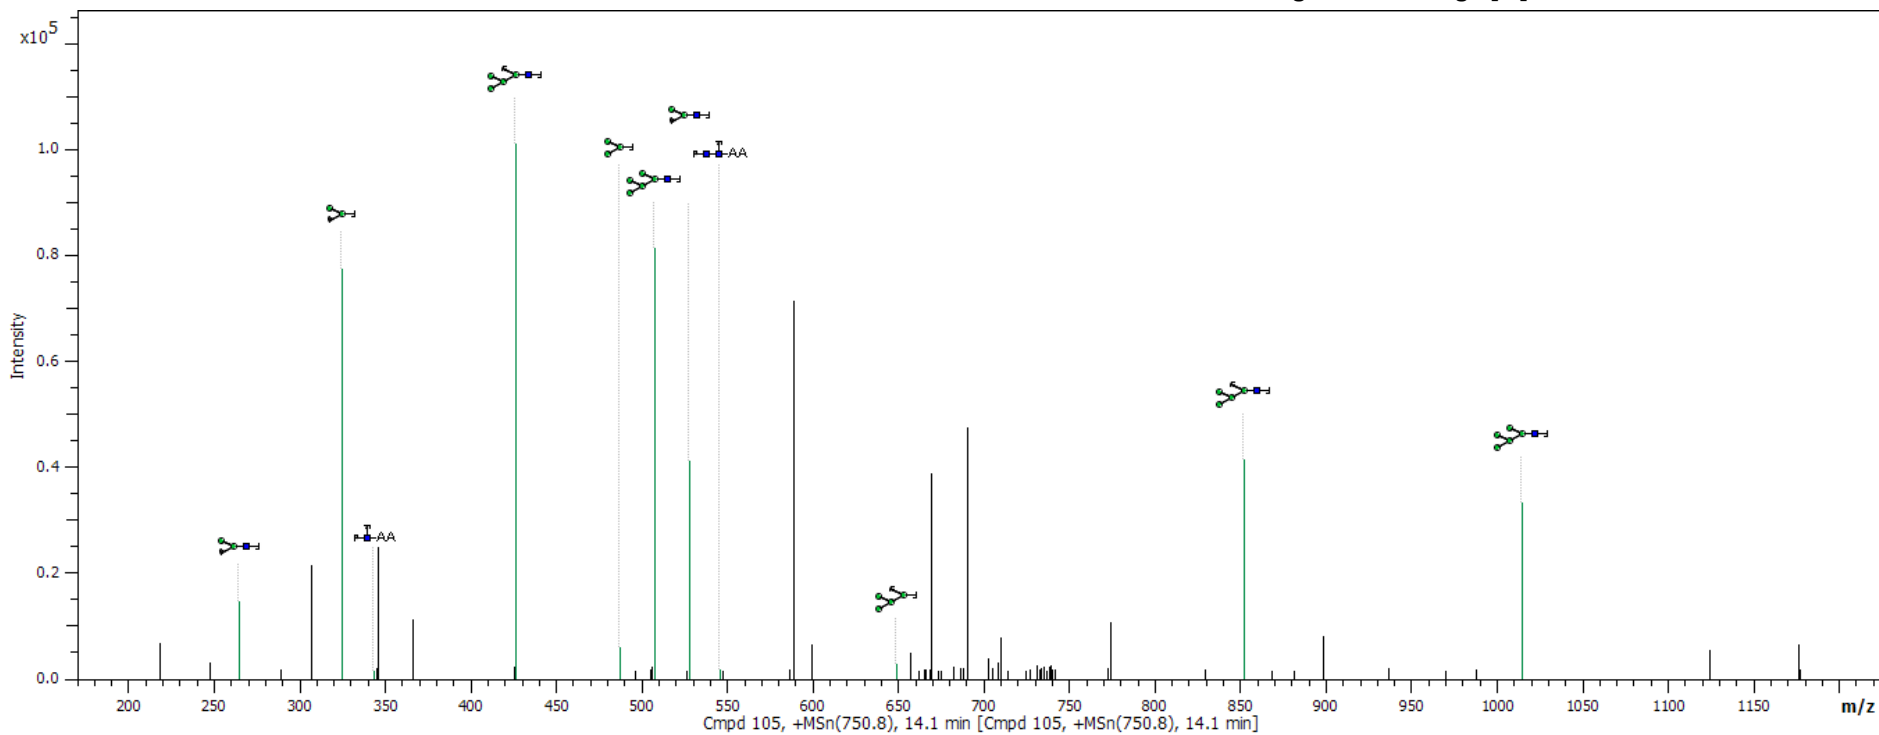

# Spectrum 25

Lift of 1516.5 [M-H]<sup>-</sup>  
Hex6HexNAc2-AA

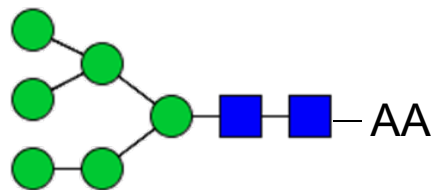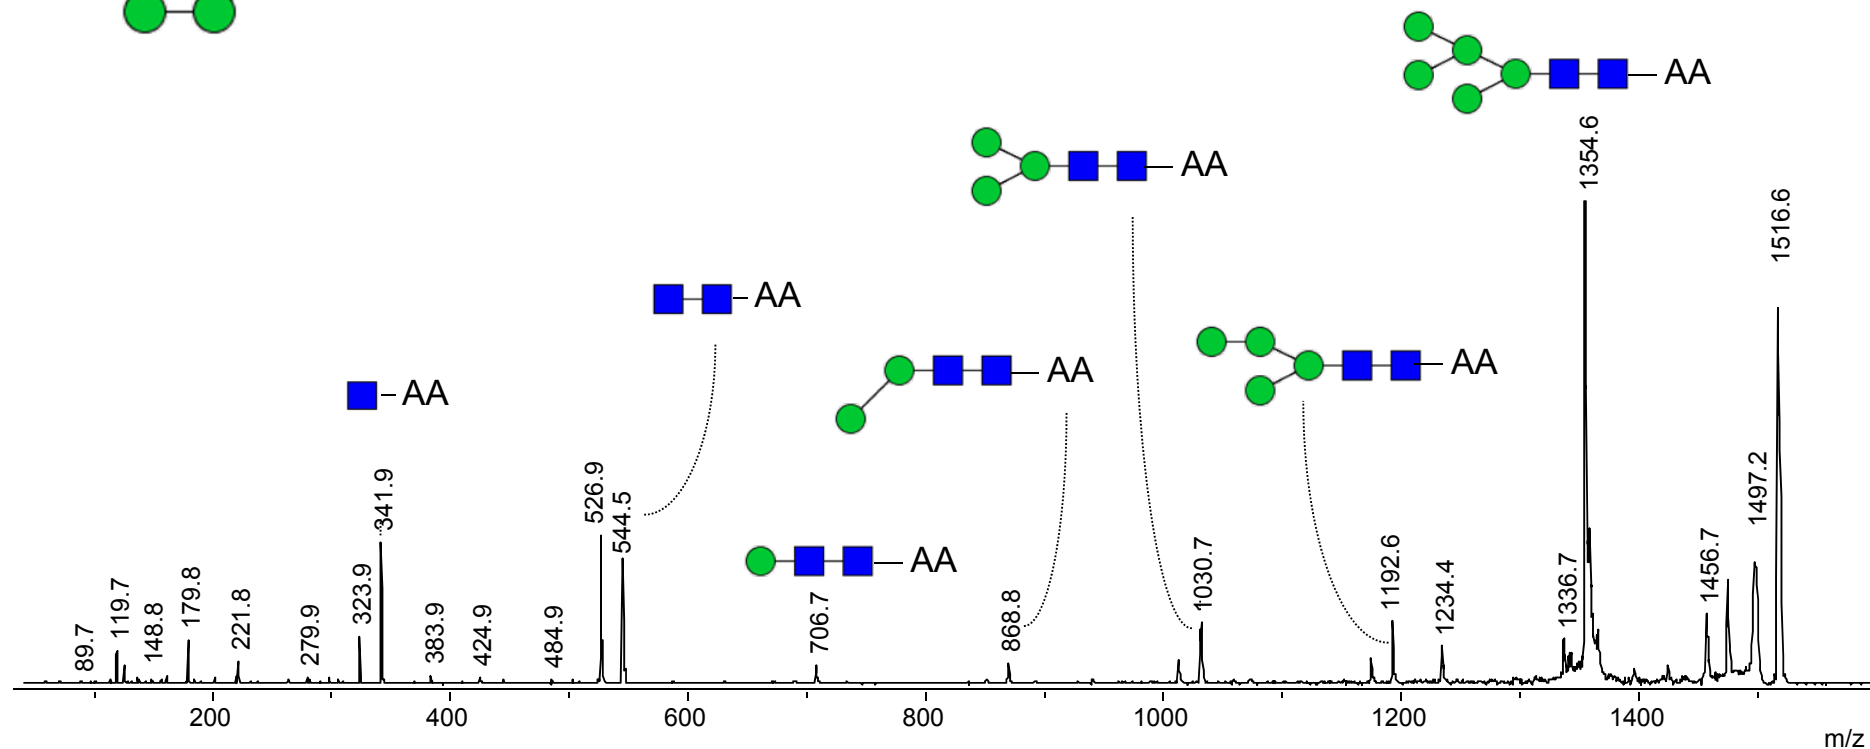



# Spectrum 25

## Glycan Search Report

Glycan: 1

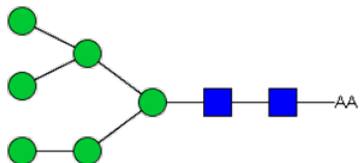

**Project path:** /N-glycans cancer/Lift spectra 01/CombinedUNKNOWN  
**MS data:** c:/documents and settings/ciabalog/desktop/17-02-11/lift of 1516.48/0\_e5/1/1516.4800.lift/1sref/pdata/1/1r  
**Parent m/z:** 1516.5316 -1      **Score:** 64.166  
**Composition:** Hex6HexNAc2-AA      **Intensity coverage [%]:** 0.55  
**Accession:** 36315      **Fragment coverage [%]:** 0.75

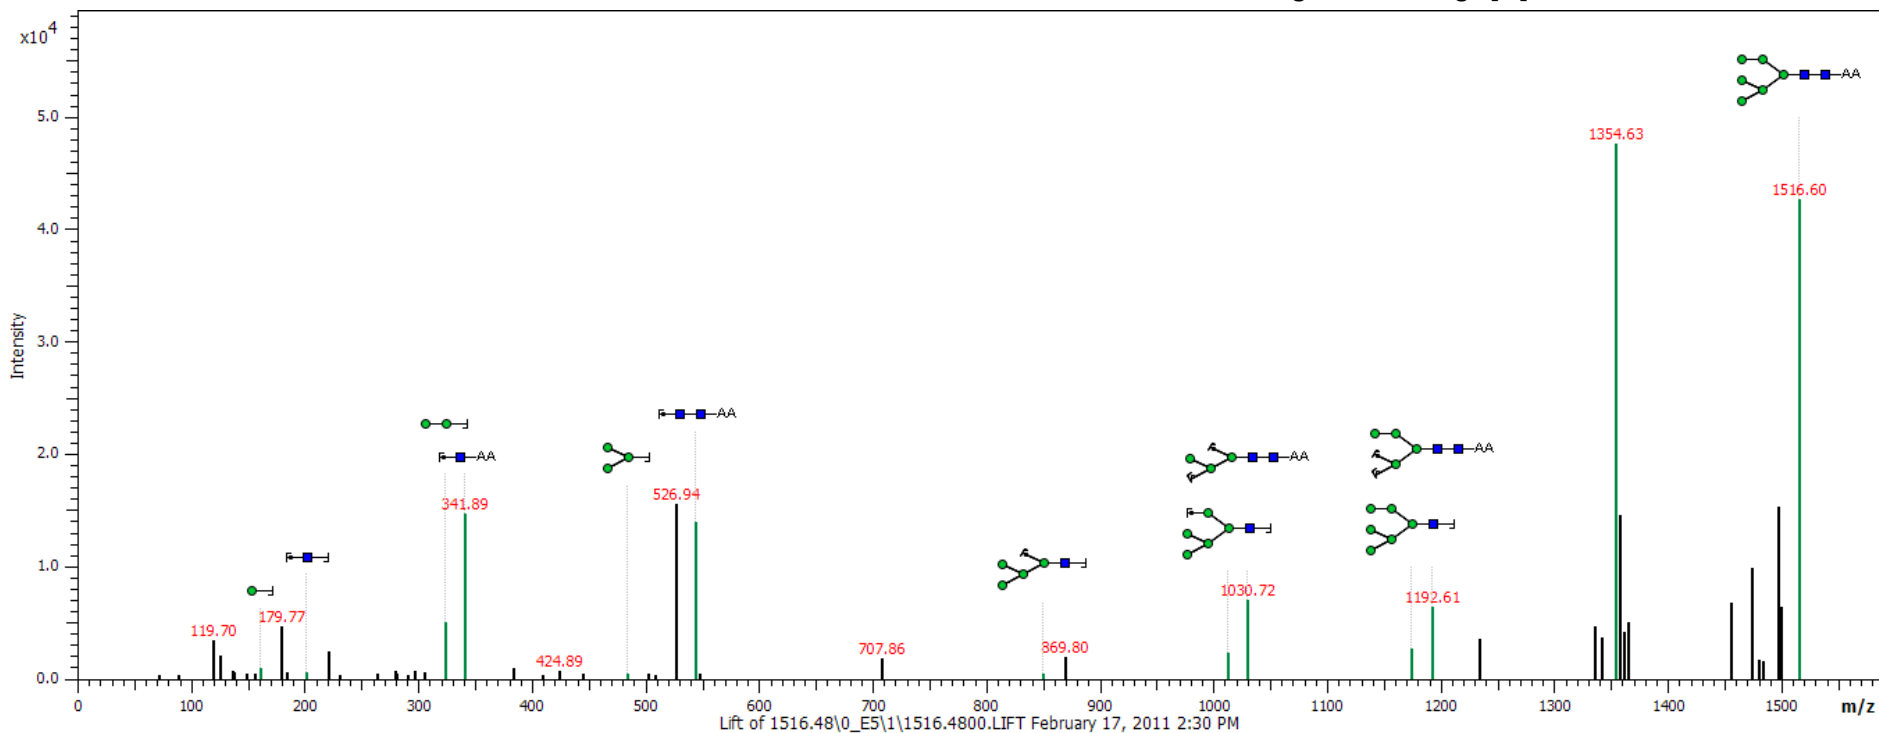

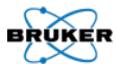

# Spectrum 26

## Glycan Search Report

Glycan: 2



**Project path:** /N-glycans cancer/25141/comp\_25141.mgf  
**MS data:** K:/Cancer-CCR/N-glycans raw data\_MS/LC-MS of the discriminators/25141\_01.d/comp\_25141.mgf  
**Parent m/z:** 759.7767 2+ **Score:** 85.567  
**Composition:** Hex6HexNAc2-AA **Intensity coverage [%]:** 0.64  
**Accession:** 36315 **Fragment coverage [%]:** 1.14

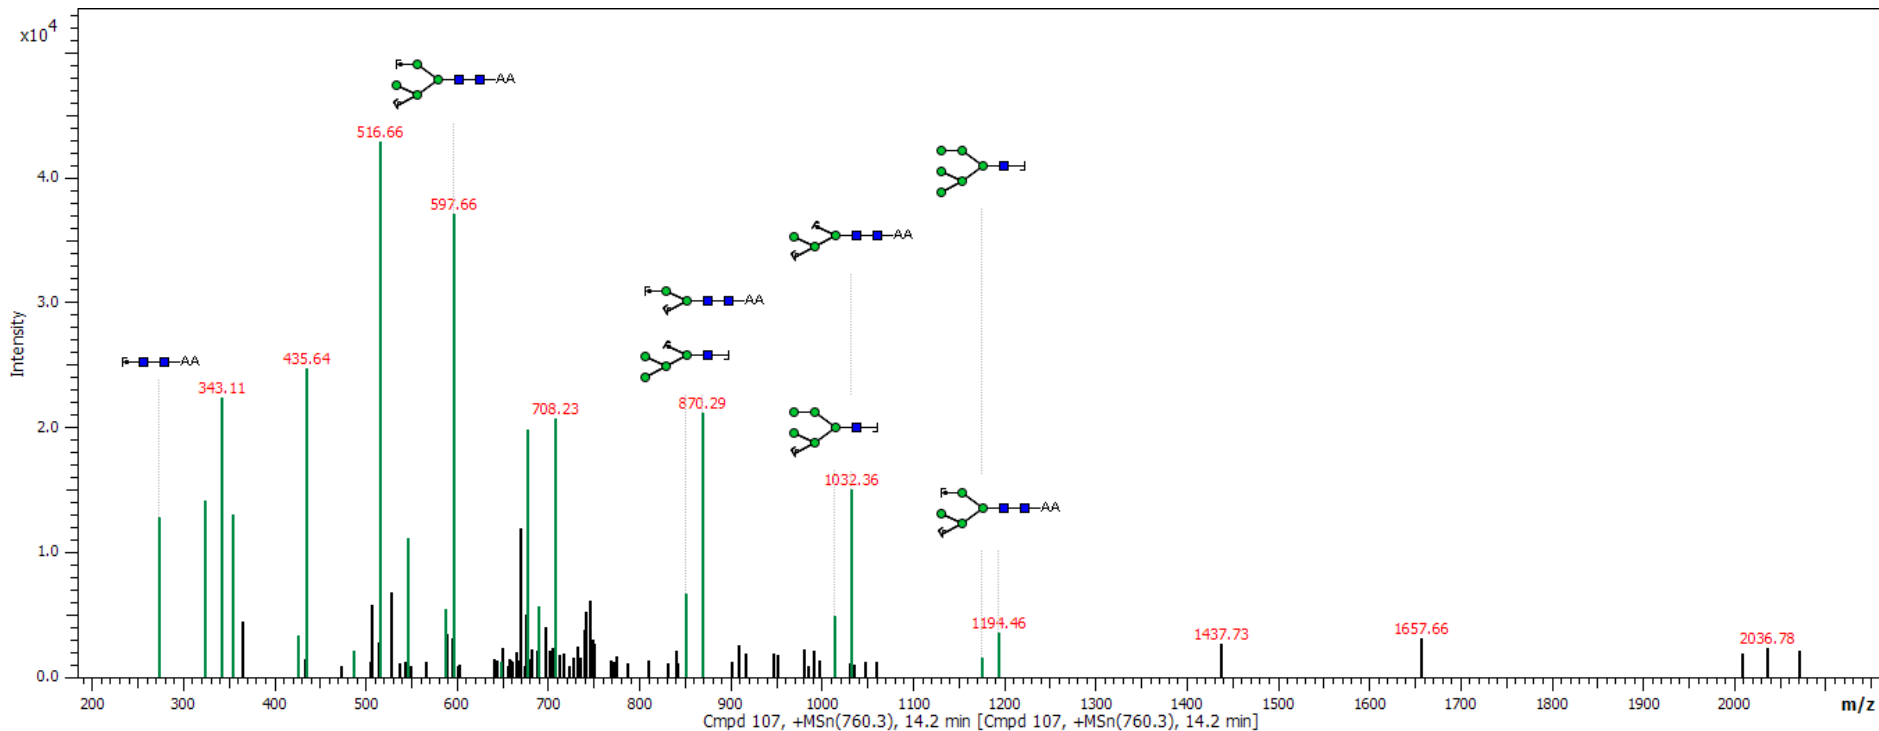

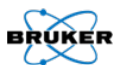

# Spectrum 27

## Glycan Search Report

Glycan: 9

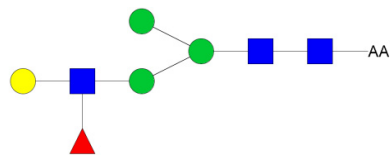

**Project path:** /N-glycans cancer/25141/comp\_25141.mgf  
**MS data:** K:/Cancer-CCR/N-glycans raw data\_MS/LC-MS of the discriminators/25141\_01.d/comp\_25141.mgf  
**Parent m/z:** 772.2926 2+ **Score:** 32.282  
**Composition:** Hex4HexNAc3dHex1-AA **Intensity coverage [%]:** 0.56  
**Accession:** 29050 **Fragment coverage [%]:** 0.19

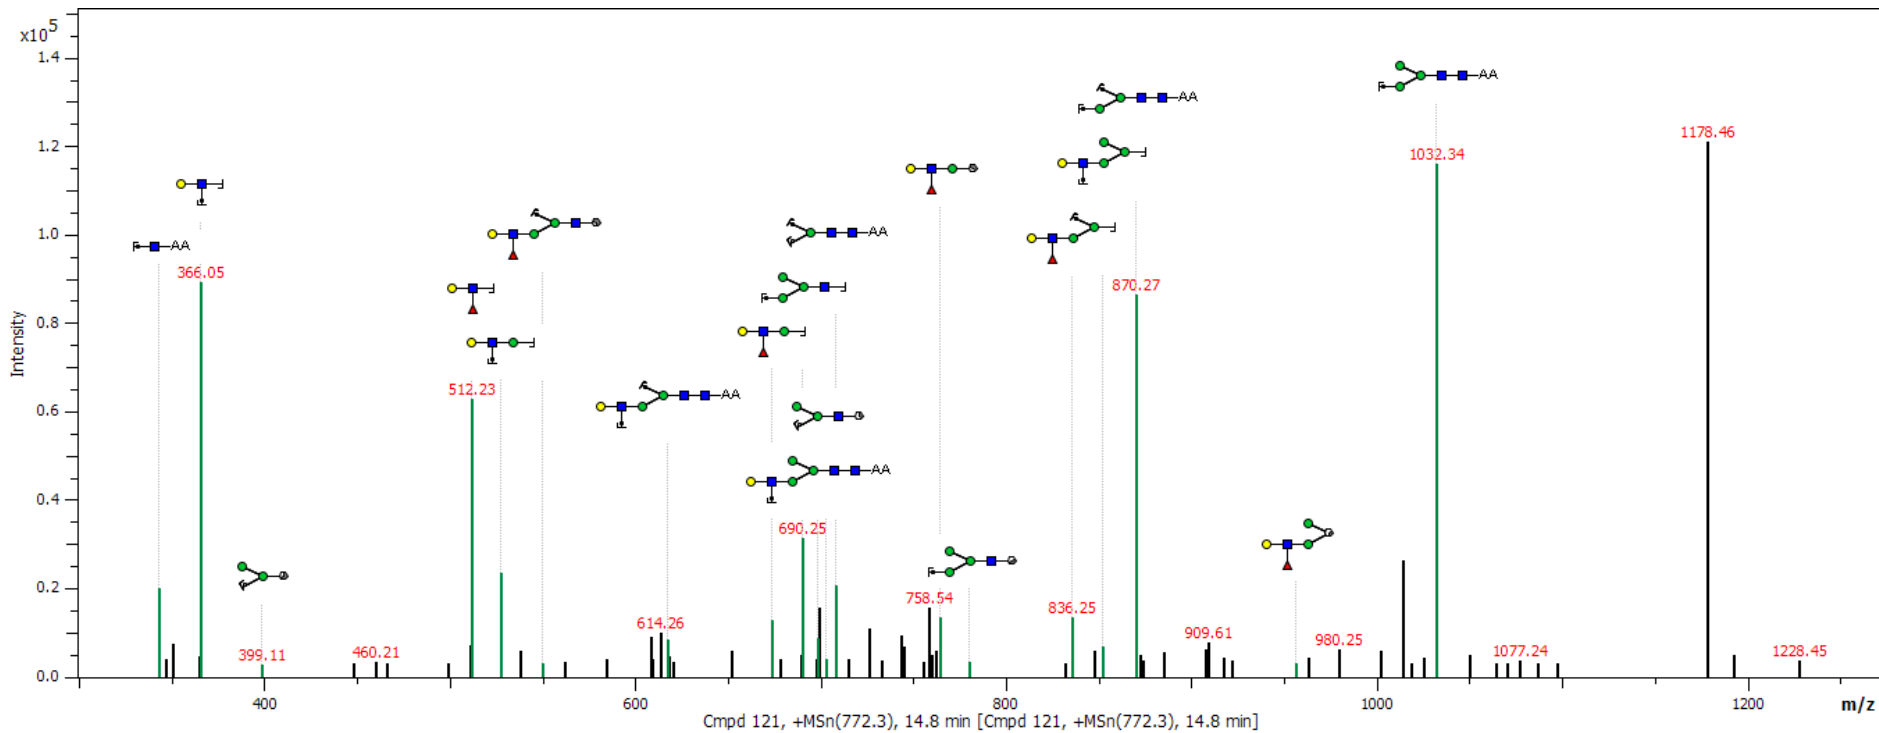



# Spectrum 28

## Glycan Search Report

Glycan: 9

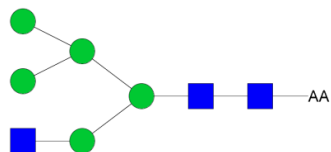

**Project path:** /N-glycans cancer/25141/comp\_25141.mgf  
**MS data:** K:/Cancer-CCR/N-glycans raw data\_MS/LC-MS of the discriminators/25141\_01.d/comp\_25141.mgf  
**Parent m/z:** 780.2900 2+ **Score:** 34.511  
**Composition:** Hex5HexNAc3-AA **Intensity coverage [%]:** 0.23  
**Accession:** 36316 **Fragment coverage [%]:** 0.52

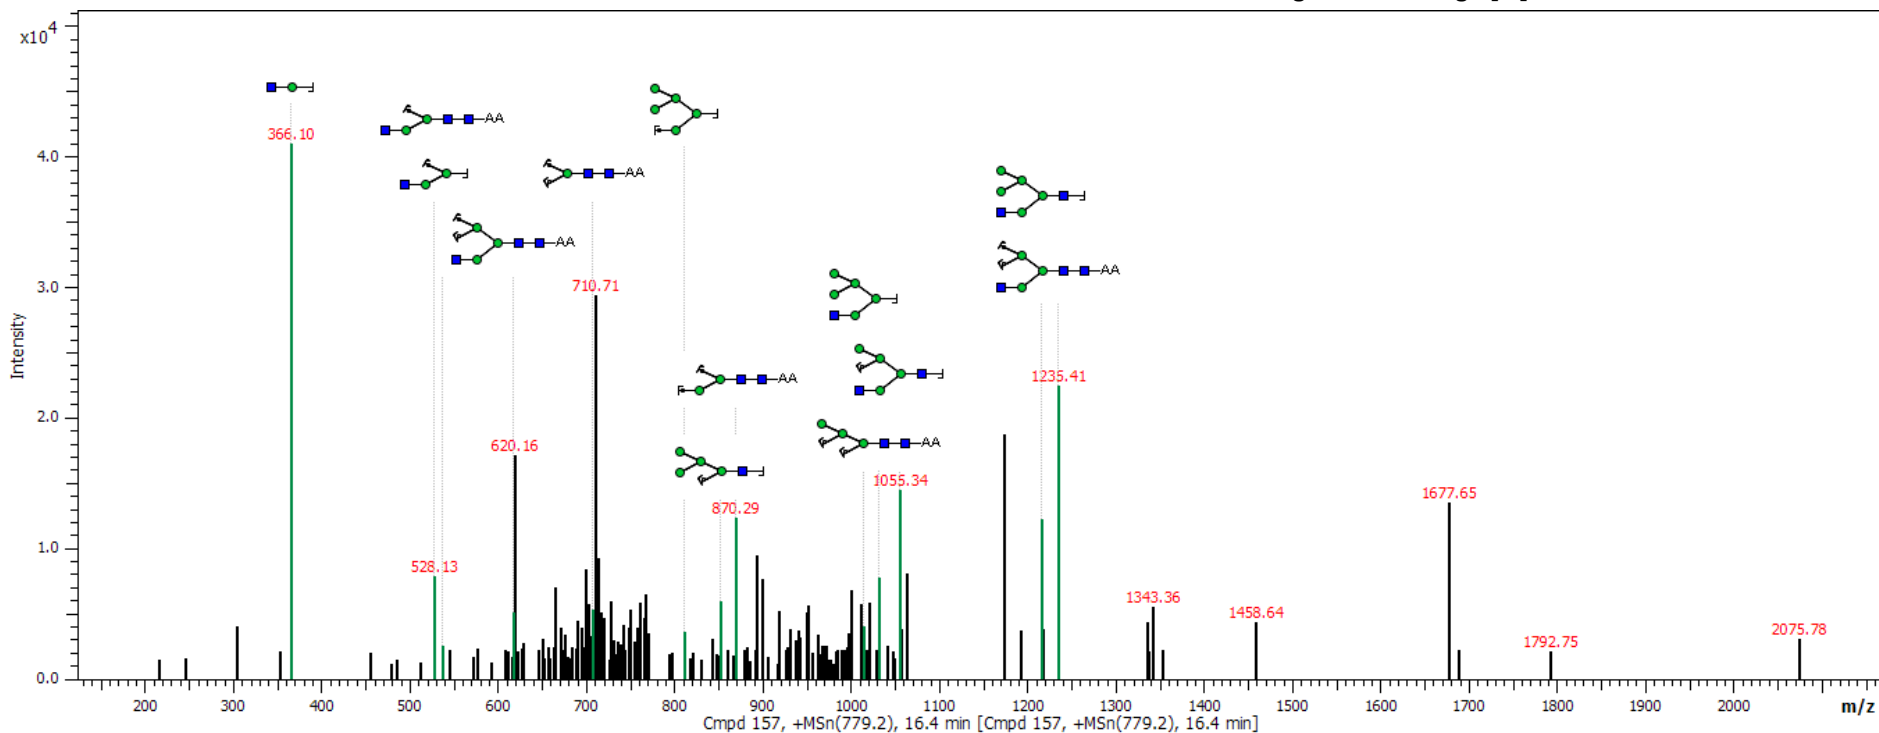

# Spectrum 29

ESI MS/MS of 792.8 [M+2H]<sup>2+</sup>  
dHex1Hex3HexNAc4-AA

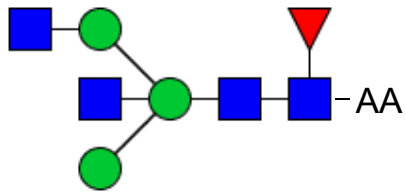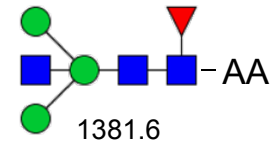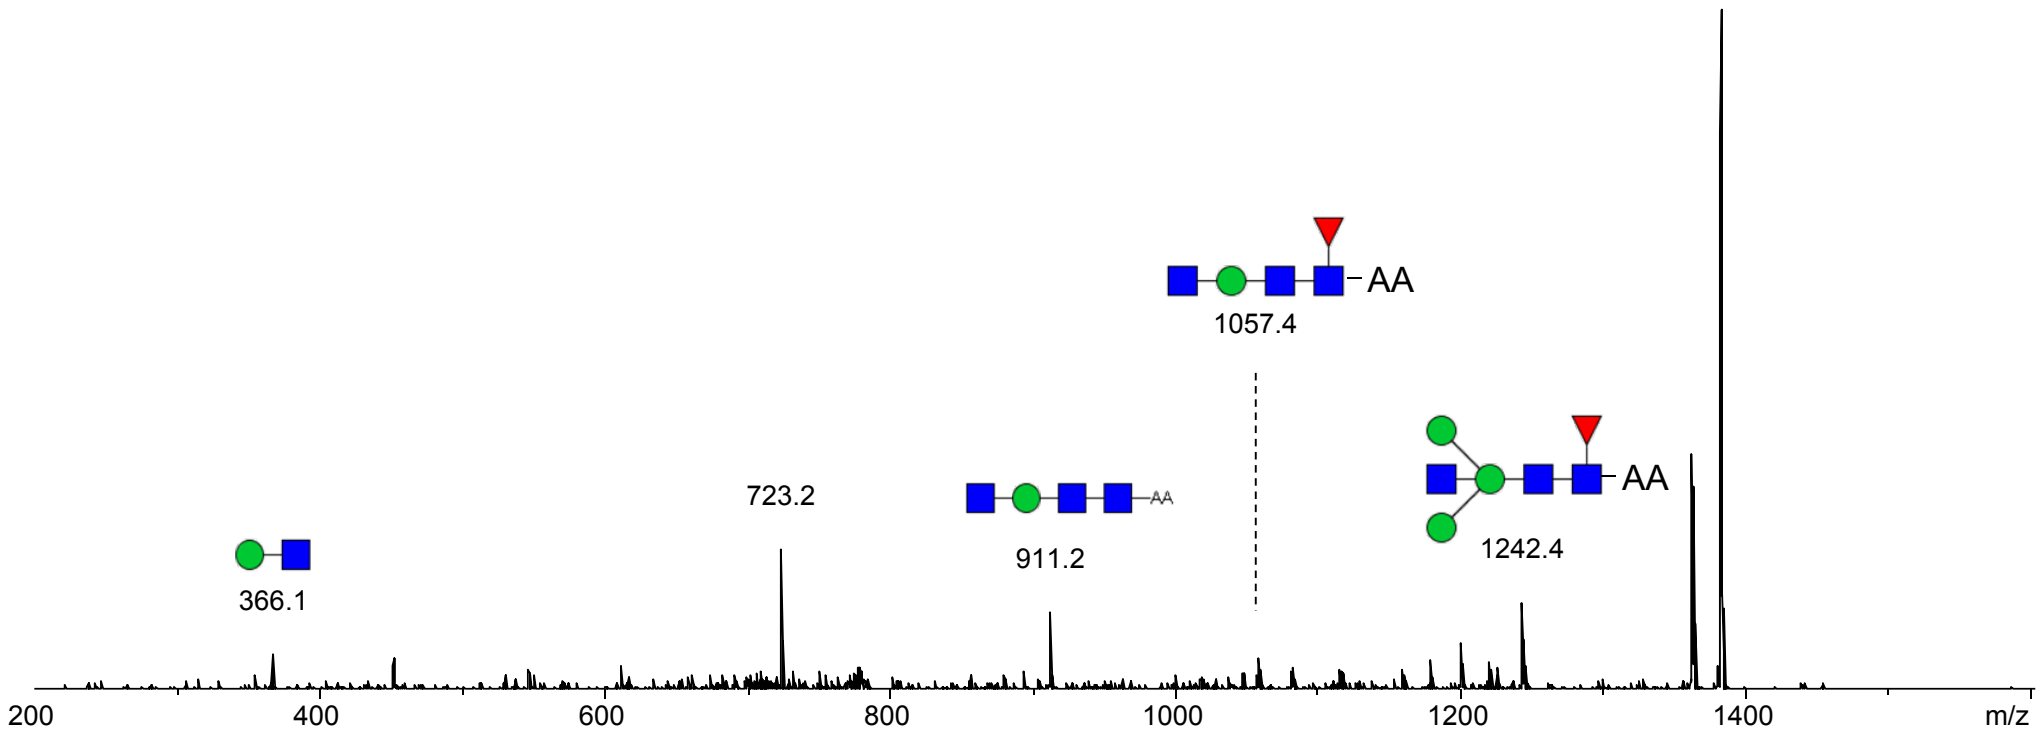





# Spectrum 30

## Glycan Search Report

Glycan: 7

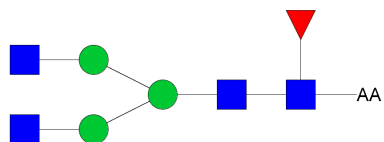

**Project path:** /N-glycans cancer/Lift spectra/CombinedLIFT  
**MS data:** c:/documents and settings/ciabalog/desktop/new folder/lift of 1582\_fraction48/0\_b13/1/1582.6000.lift/1sref/pdata/1/1r  
**Parent m/z:** 1582.5899 -1      **Score:** 51.758  
**Composition:** Hex3HexNAc4dHex1-AA      **Intensity coverage [%]:** 0.68  
**Accession:** 2620      **Fragment coverage [%]:** 0.39

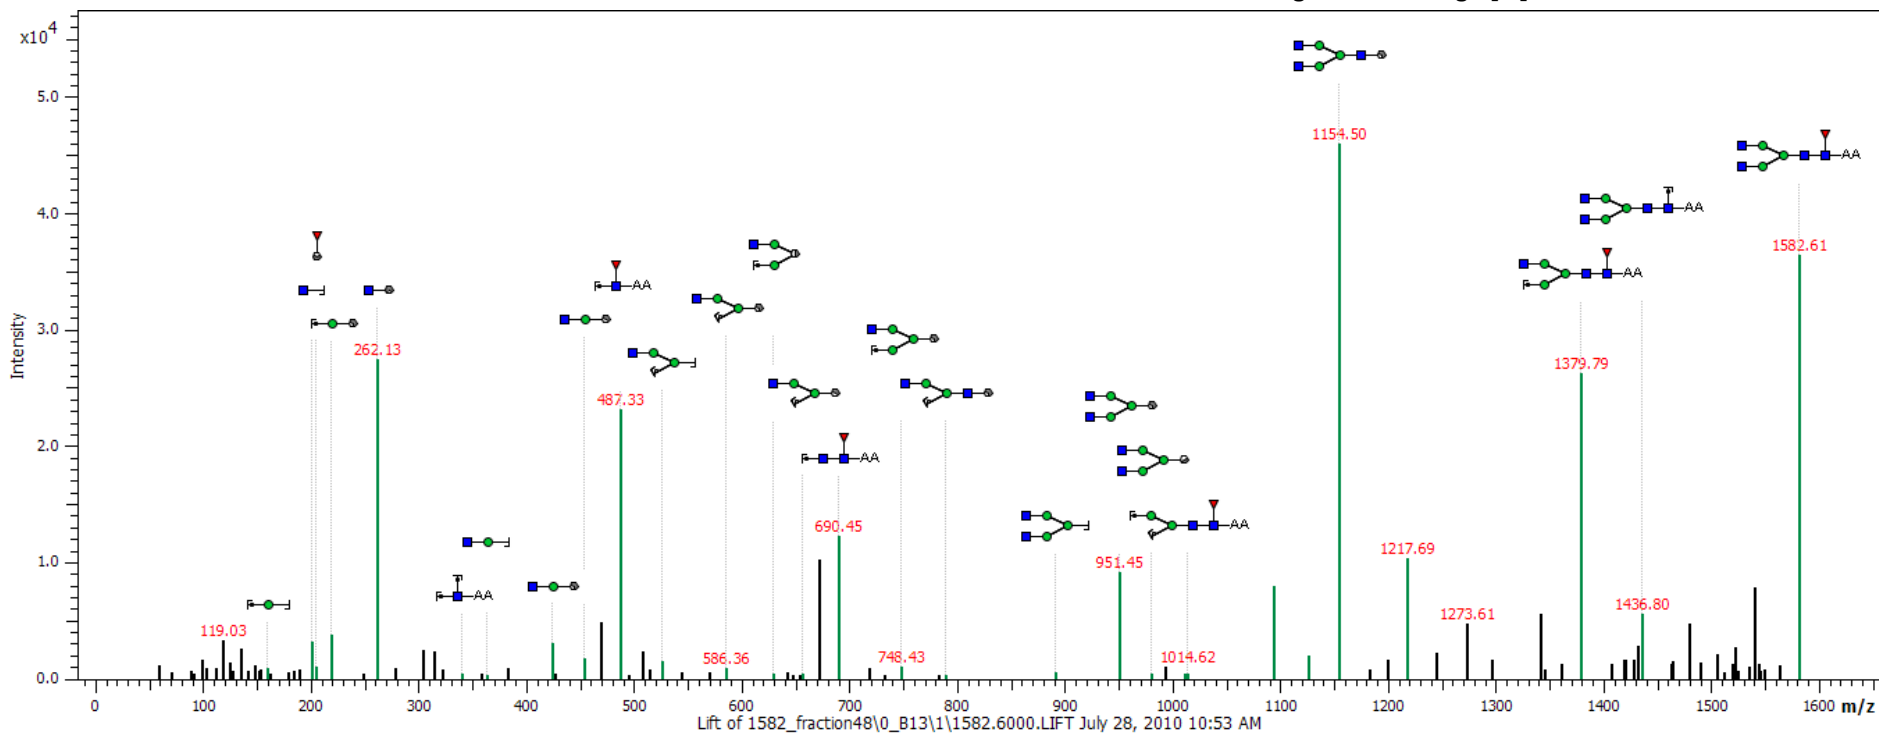



# Spectrum 31

## Glycan Search Report

Glycan: 1



**Project path:** /N-glycans cancer/25139/comp\_25139.mgf  
**MS data:** G:/Cancer-CCR/N-glycans raw data\_MS/LC-MS of the discriminators/25139\_01.d/comp\_25139.mgf  
**Parent m/z:** 792.8059 2+ **Score:** 81.871  
**Composition:** Hex3HexNAc4dHex1-AA **Intensity coverage [%]:** 0.94  
**Accession:** 36231 **Fragment coverage [%]:** 0.71

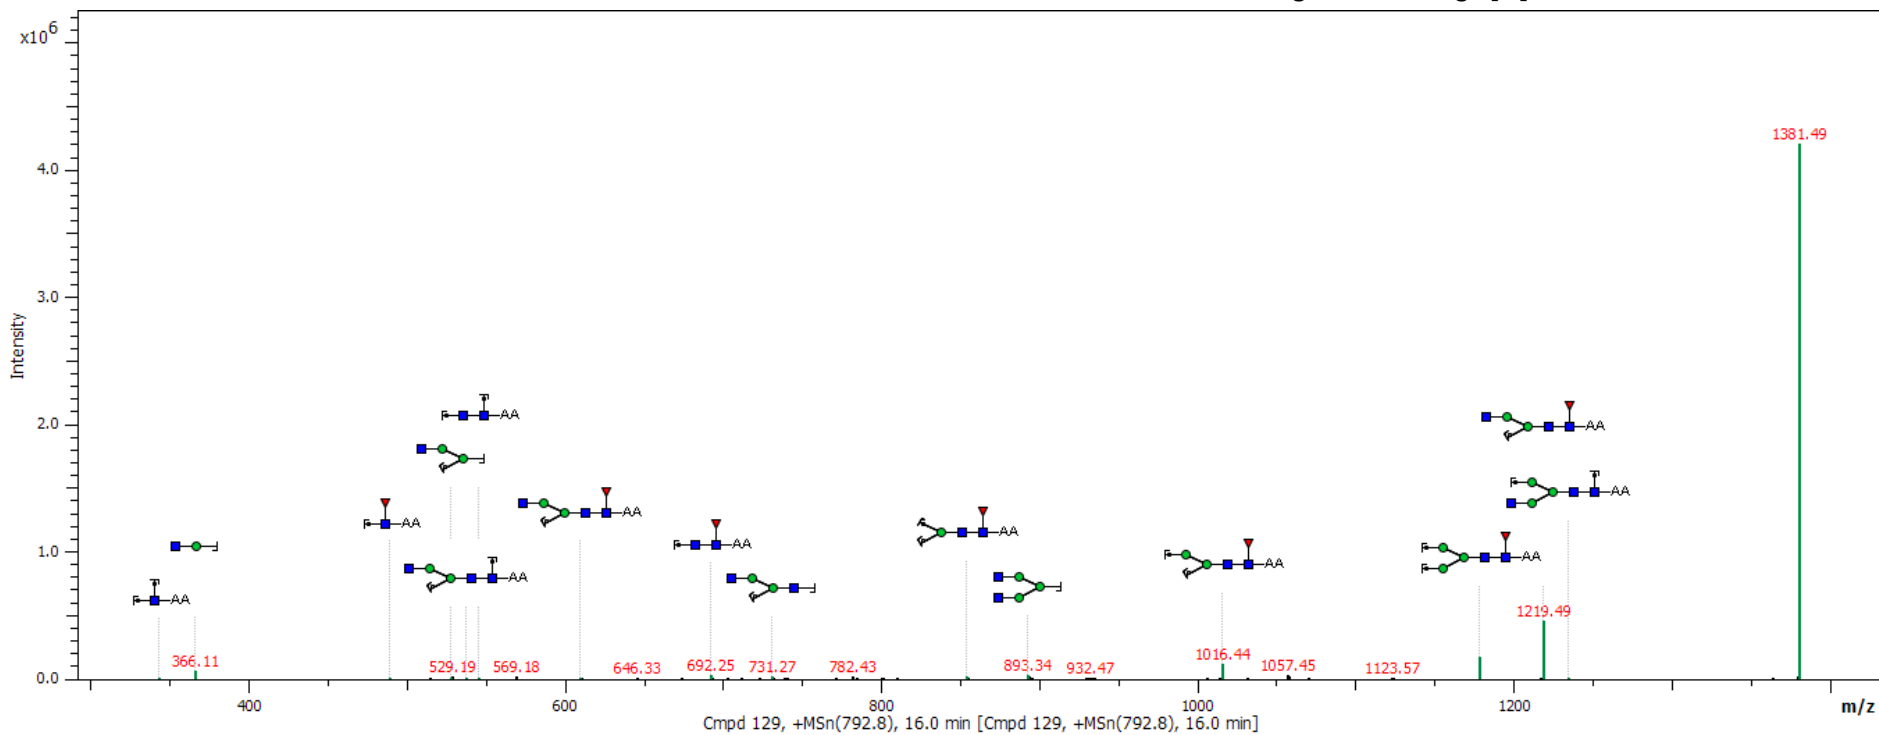



# Spectrum 32

## Glycan Search Report

Glycan: 2

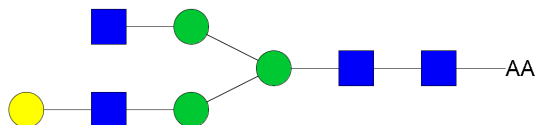

**Project path:** /N-glycans cancer/25142/comp\_25142\_01.mgf

**MS data:** K:/Cancer-CCR/N-glycans raw data\_MS/LC-MS of the discriminators/25142\_01.d/comp\_25142\_01.mgf

**Parent m/z:** 800.8033 2+

**Score:** 72.508

**Composition:** Hex4HexNAc4-AA

**Intensity coverage [%]:** 0.58

**Accession:** 36343

**Fragment coverage [%]:** 0.91

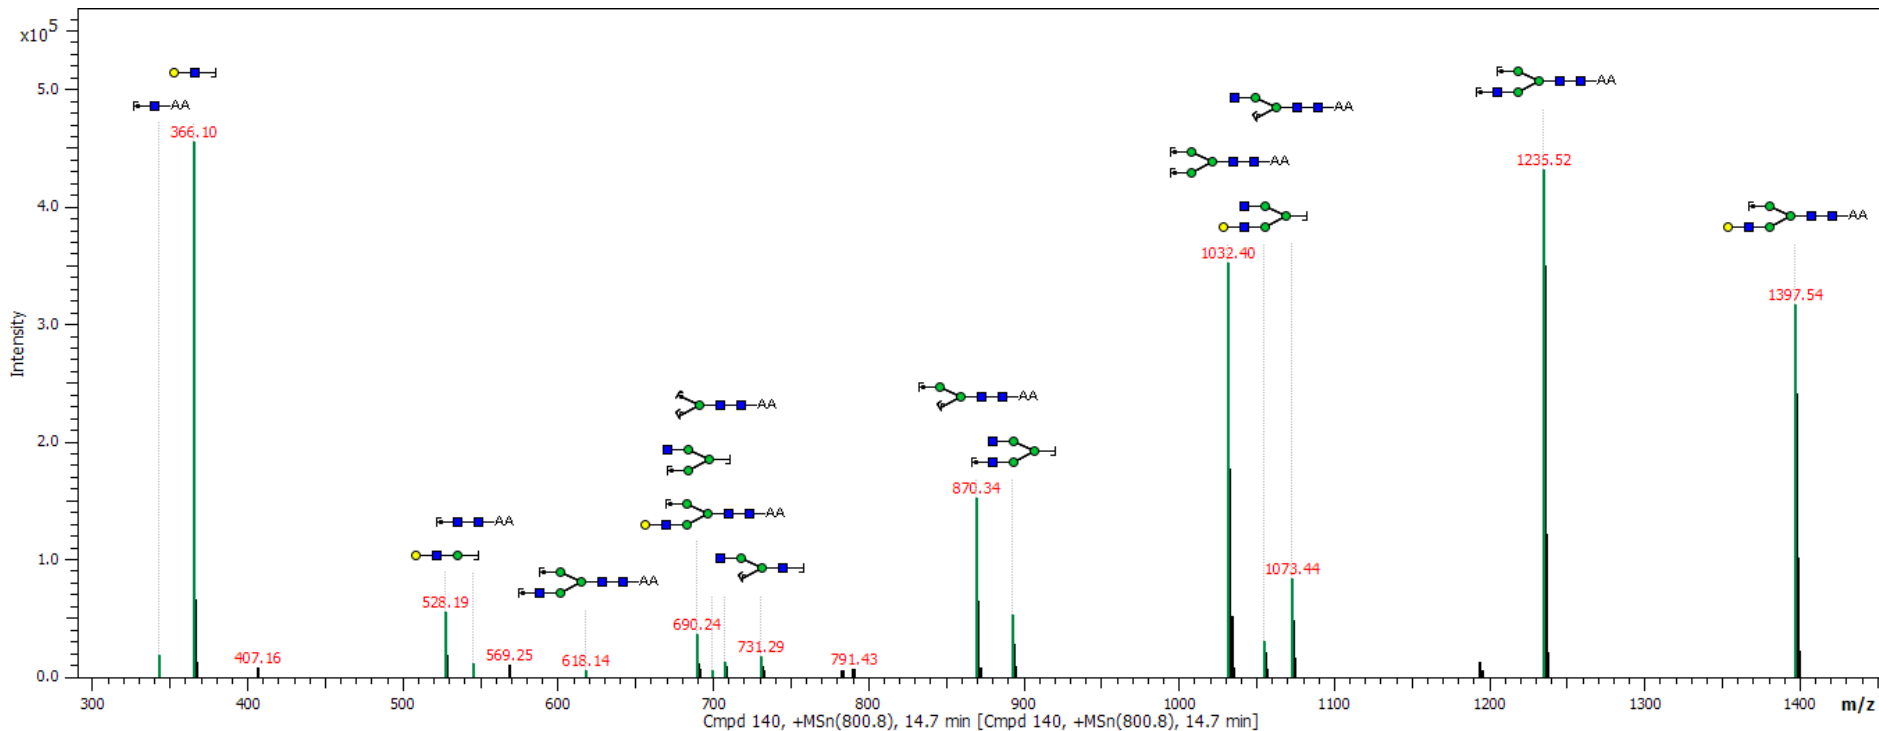

# Spectrum 33

Lift of 1621.4 [M-H]<sup>-</sup>  
S1dHex1Hex4HexNAc3-AA

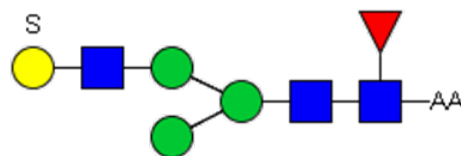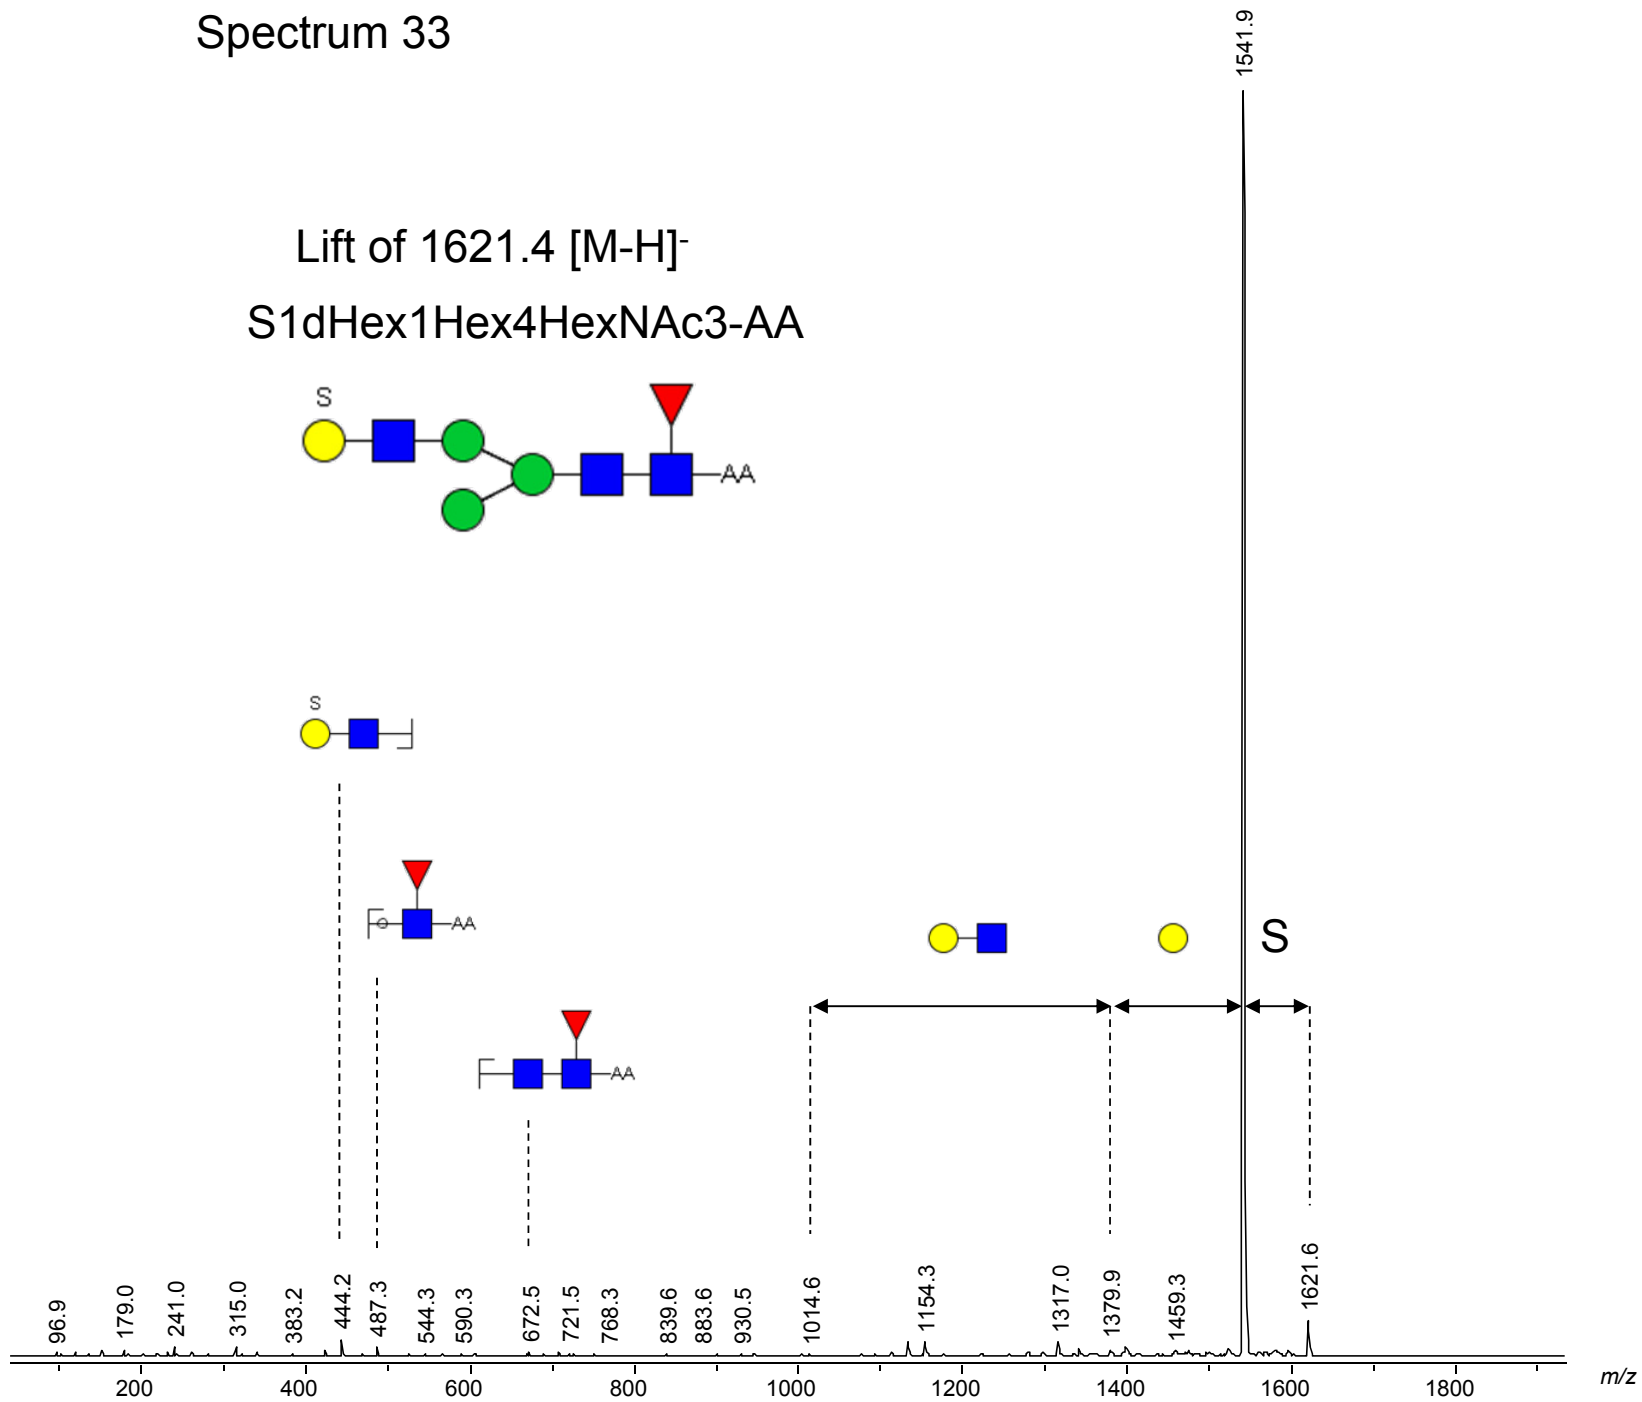



# Spectrum 34

## Glycan Search Report

Glycan: 13

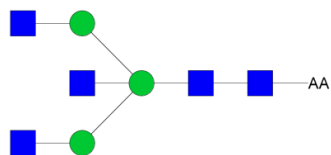

**Project path:** /N-glycans cancer/Lift spectra/CombinedLIFT  
**MS data:** c:/documents and settings/ciabalog/desktop/new folder/lift of 1639\_fraction47/0\_b12/1/1639.6000.lift/ 1sref/pdata/1/1r  
**Parent m/z:** 1639.6114 -1 **Score:** 28.883  
**Composition:** Hex3HexNAc5-AA **Intensity coverage [%]:** 0.37  
**Accession:** 1032 **Fragment coverage [%]:** 0.23

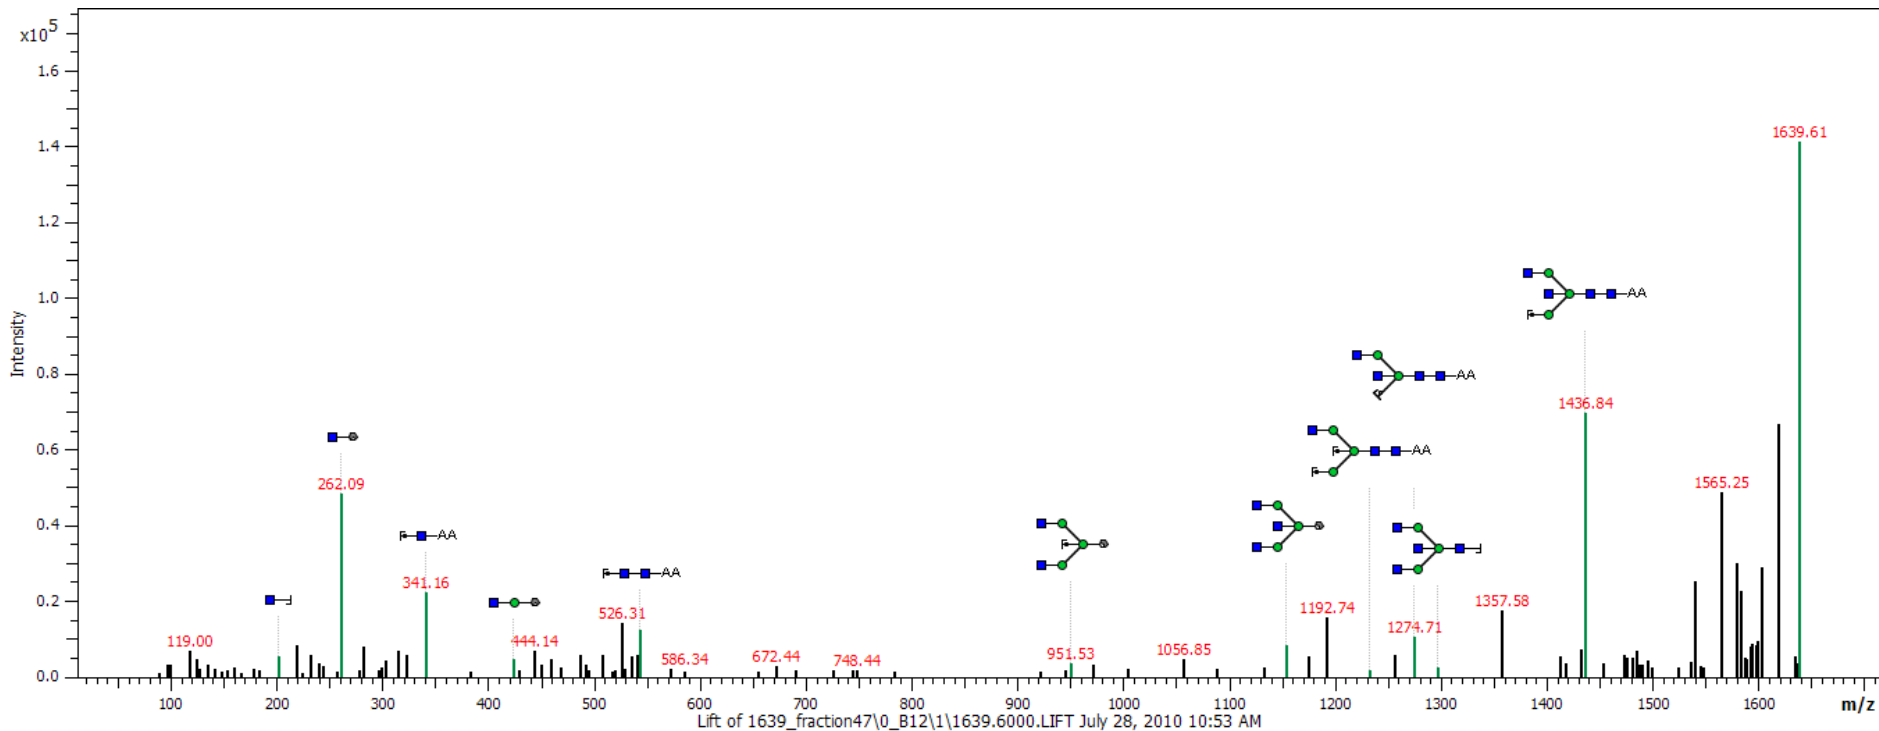



# Spectrum 35

## Glycan Search Report

Glycan: 3

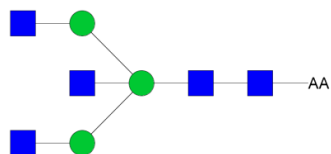

**Project path:** /N-glycans cancer/25139/comp\_25139.mgf  
**MS data:** G:/Cancer-CCR/N-glycans raw data\_MS/LC-MS of the discriminators/25139\_01.d/comp\_25139.mgf  
**Parent m/z:** 821.3166 2+ **Score:** 61.071  
**Composition:** Hex3HexNAc5-AA **Intensity coverage [%]:** 0.88  
**Accession:** 1032 **Fragment coverage [%]:** 0.43

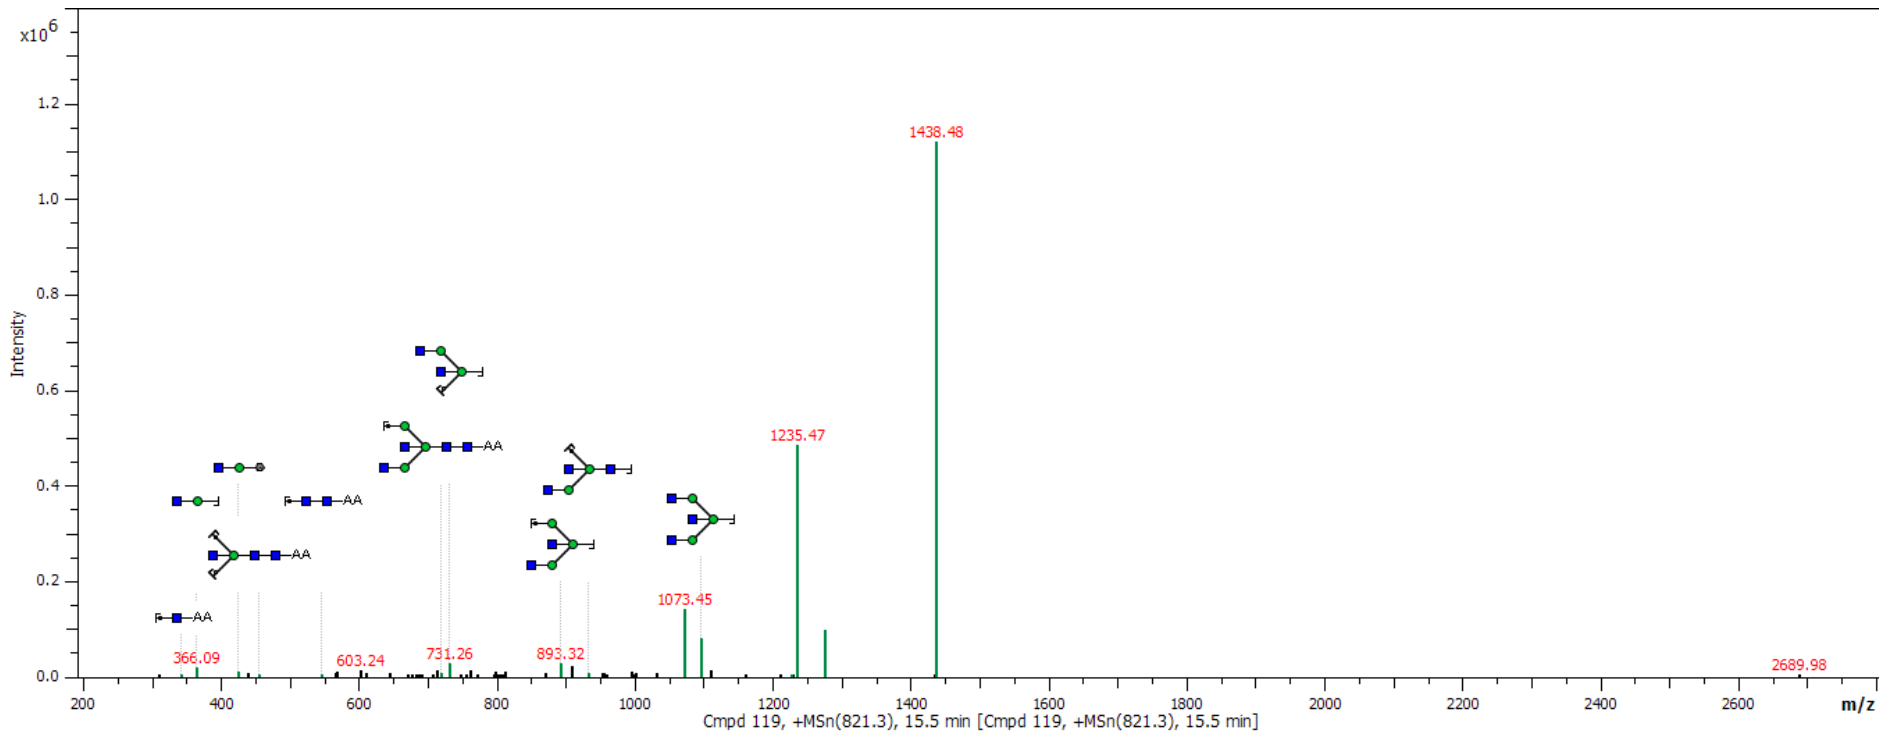

# Spectrum 35

## MS/MS 821.4 [M+2H]<sup>2+</sup>

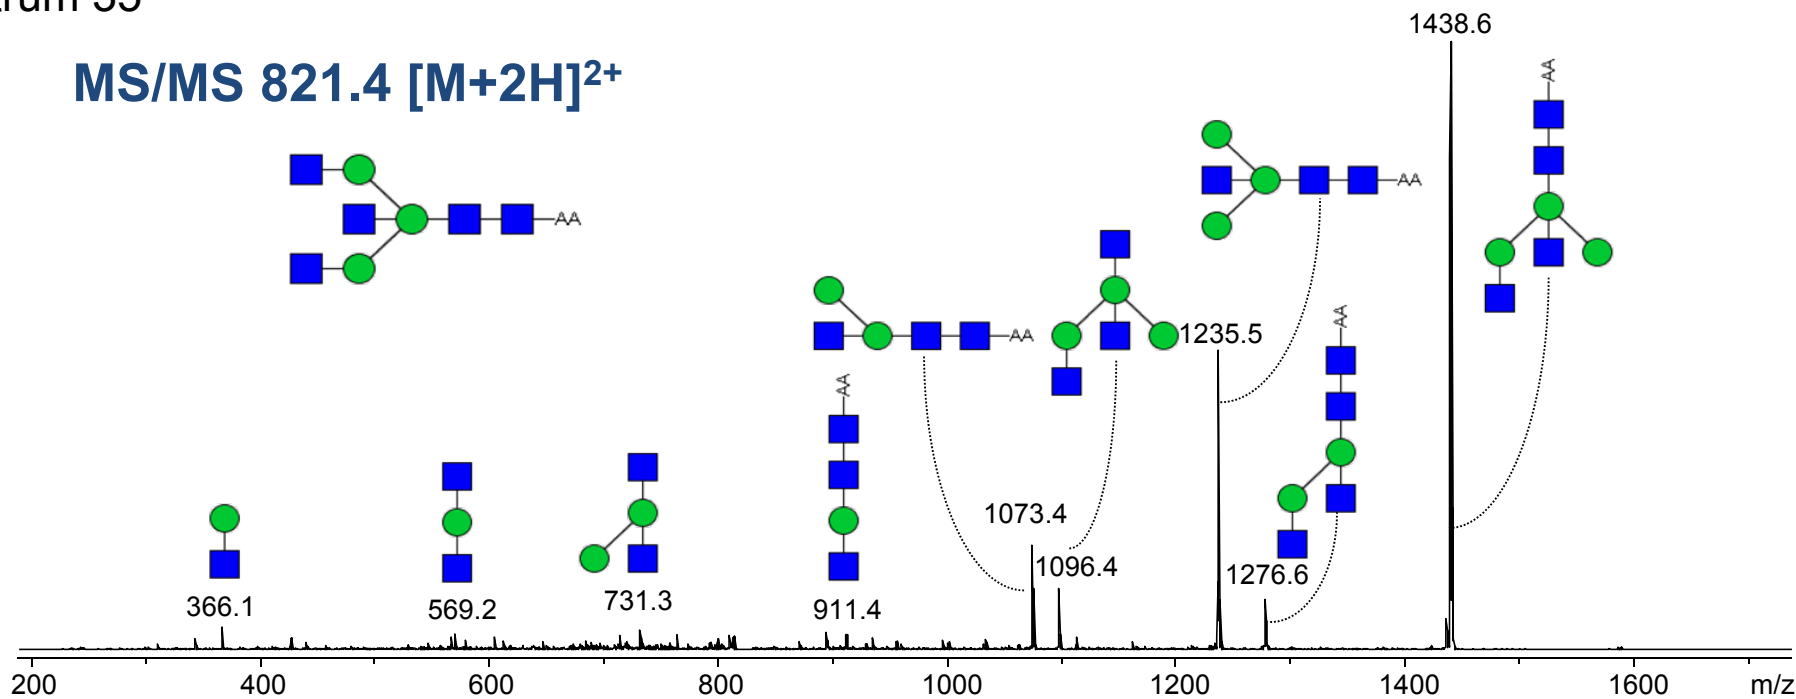

# Spectrum 34

## Lift of 1639.6 [M-H]<sup>1-</sup>

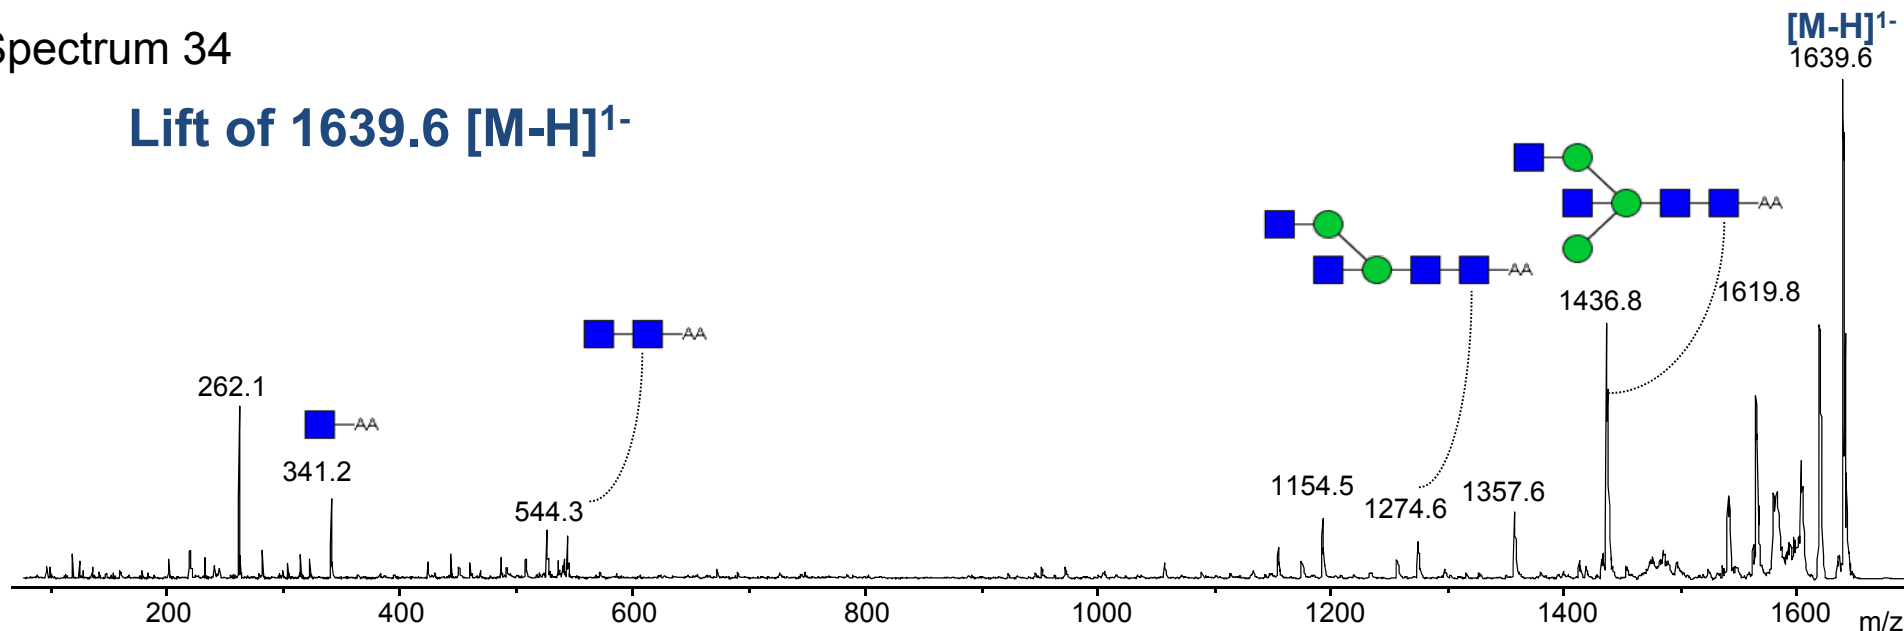

# Spectrum 36

Lift of 1662.5 [M-H]<sup>-</sup>

S1dHex1Hex3HexNAc4-AA

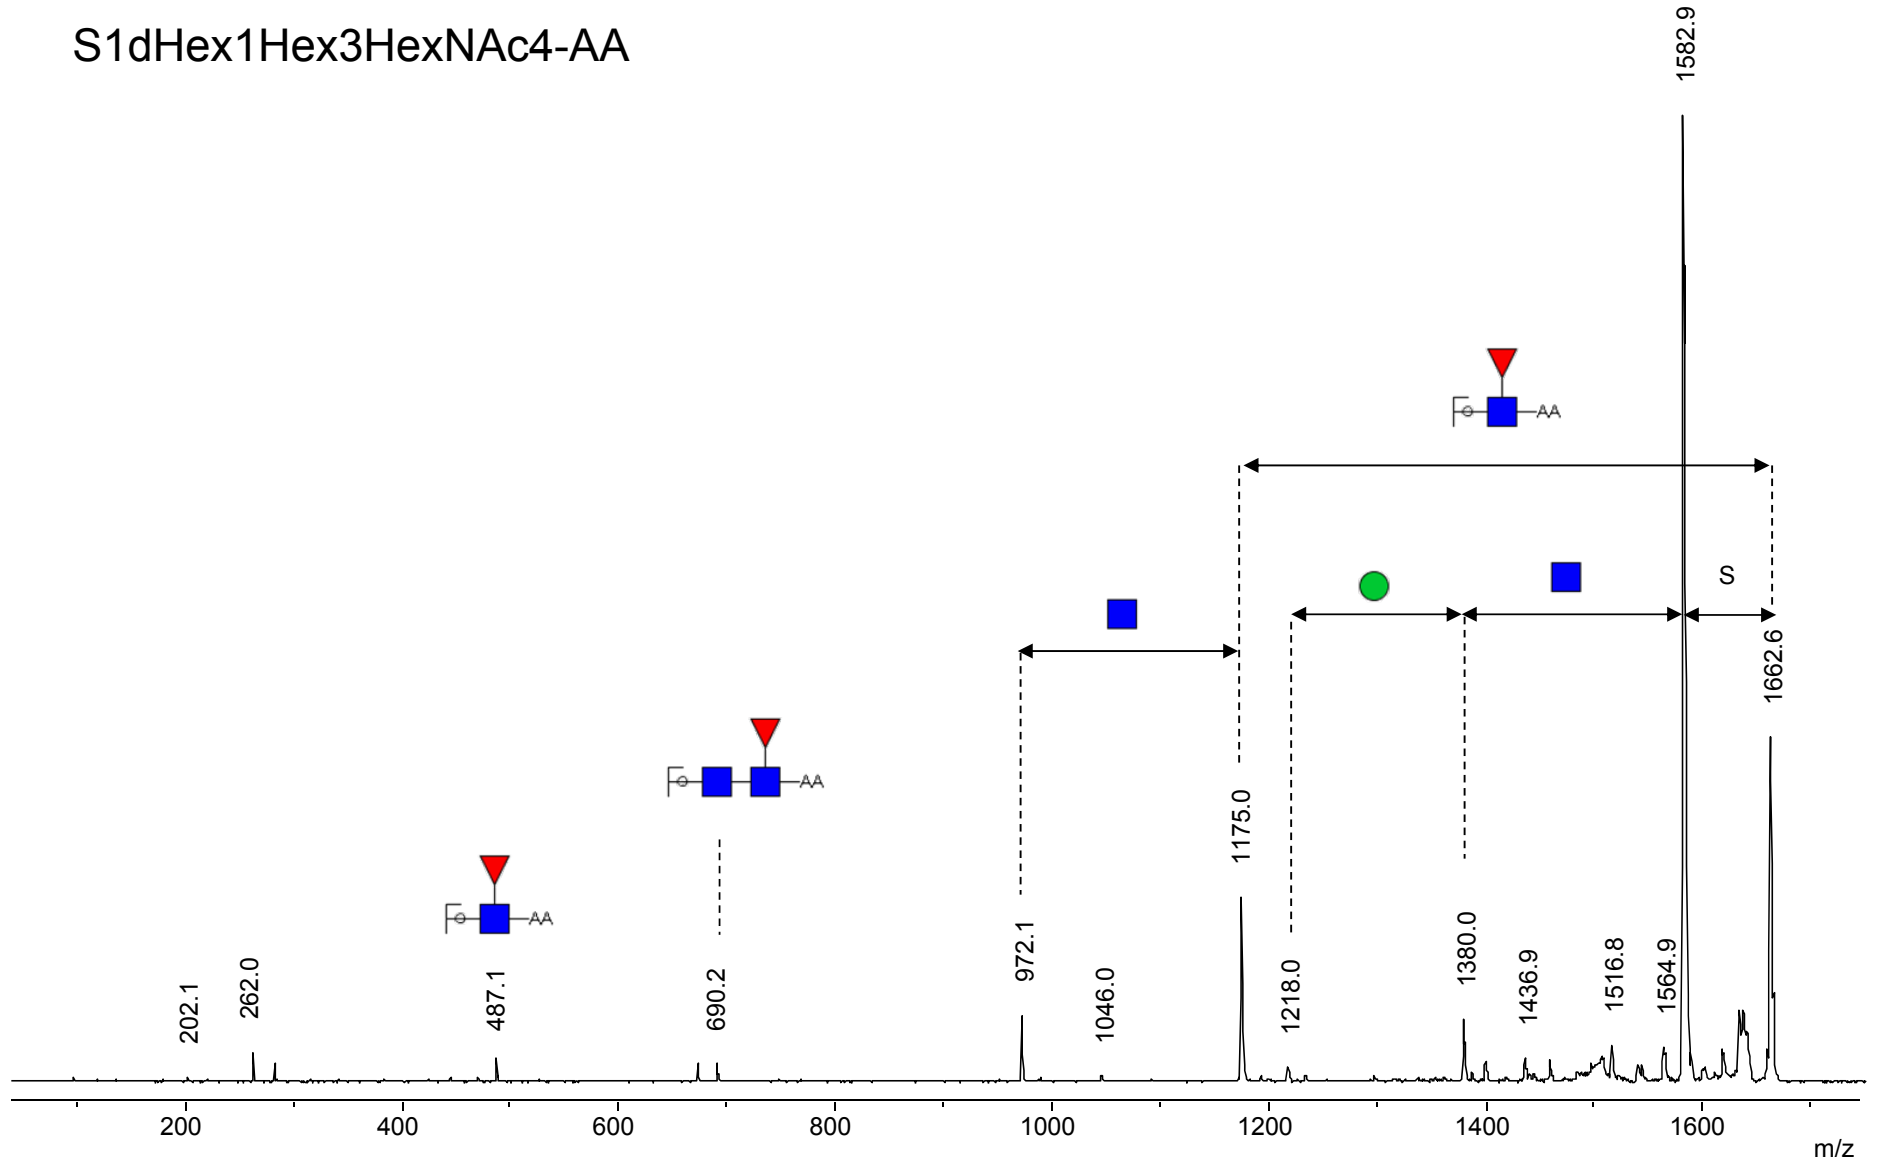





# Spectrum 37

## Glycan Search Report

Glycan: 5

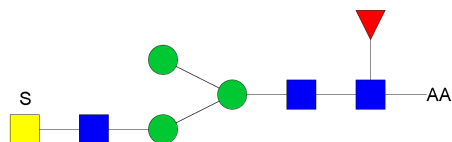

**Project path:** /N-glycans cancer/25139/comp\_25139.mgf  
**MS data:** G:/Cancer-CCR/N-glycans raw data\_MS/LC-MS of the discriminators/25139\_01.d/comp\_25139.mgf  
**Parent m/z:** 832.7843 2+ **Score:** 35.356  
**Composition:** Hex3HexNAc4S1dHex1-AA **Intensity coverage [%]:** 0.65  
**Accession:** 17280 **Fragment coverage [%]:** 0.19

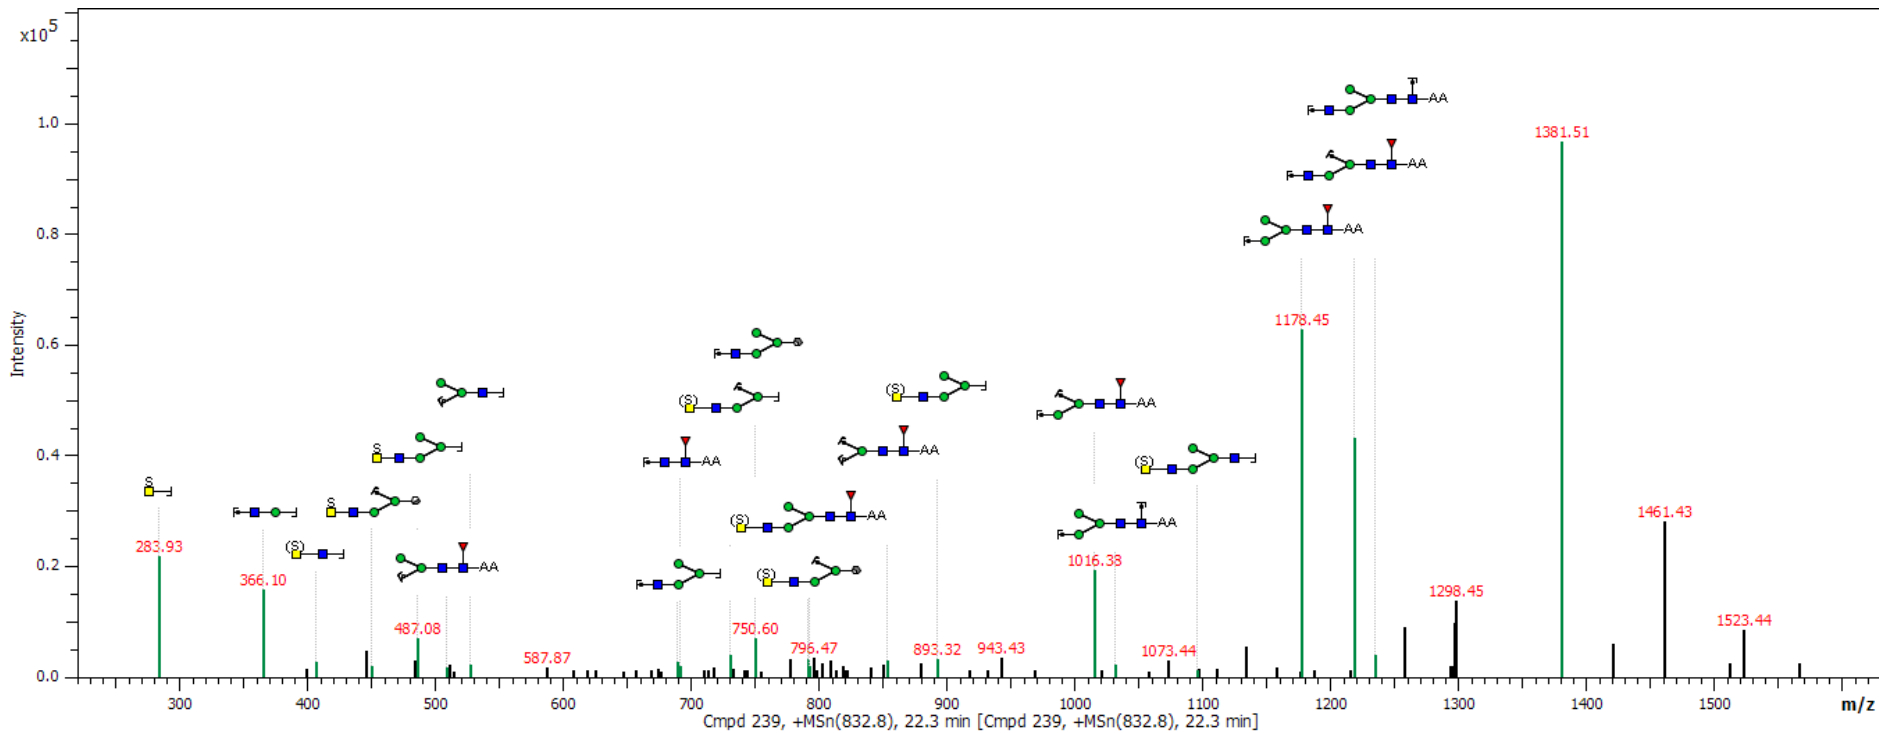



# Spectrum 38

## Glycan Search Report

Glycan: 4

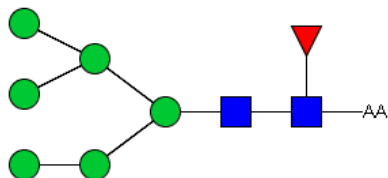

**Project path:** /N-glycans cancer/Lift spectra 01/CombinedUNKNOWN  
**MS data:** c:/documents and settings/ciabalog/desktop/17-02-11/17-02-11/lift of 1662.54/0\_d5/1/1662.5470.lif/1sref/pdata/1/1r  
**Parent m/z:** 1662.5895 -1      **Score:** 27.982  
**Composition:** Hex6HexNAc2dHex1-AA      **Intensity coverage [%]:** 0.53  
**Accession:** 29018      **Fragment coverage [%]:** 0.15

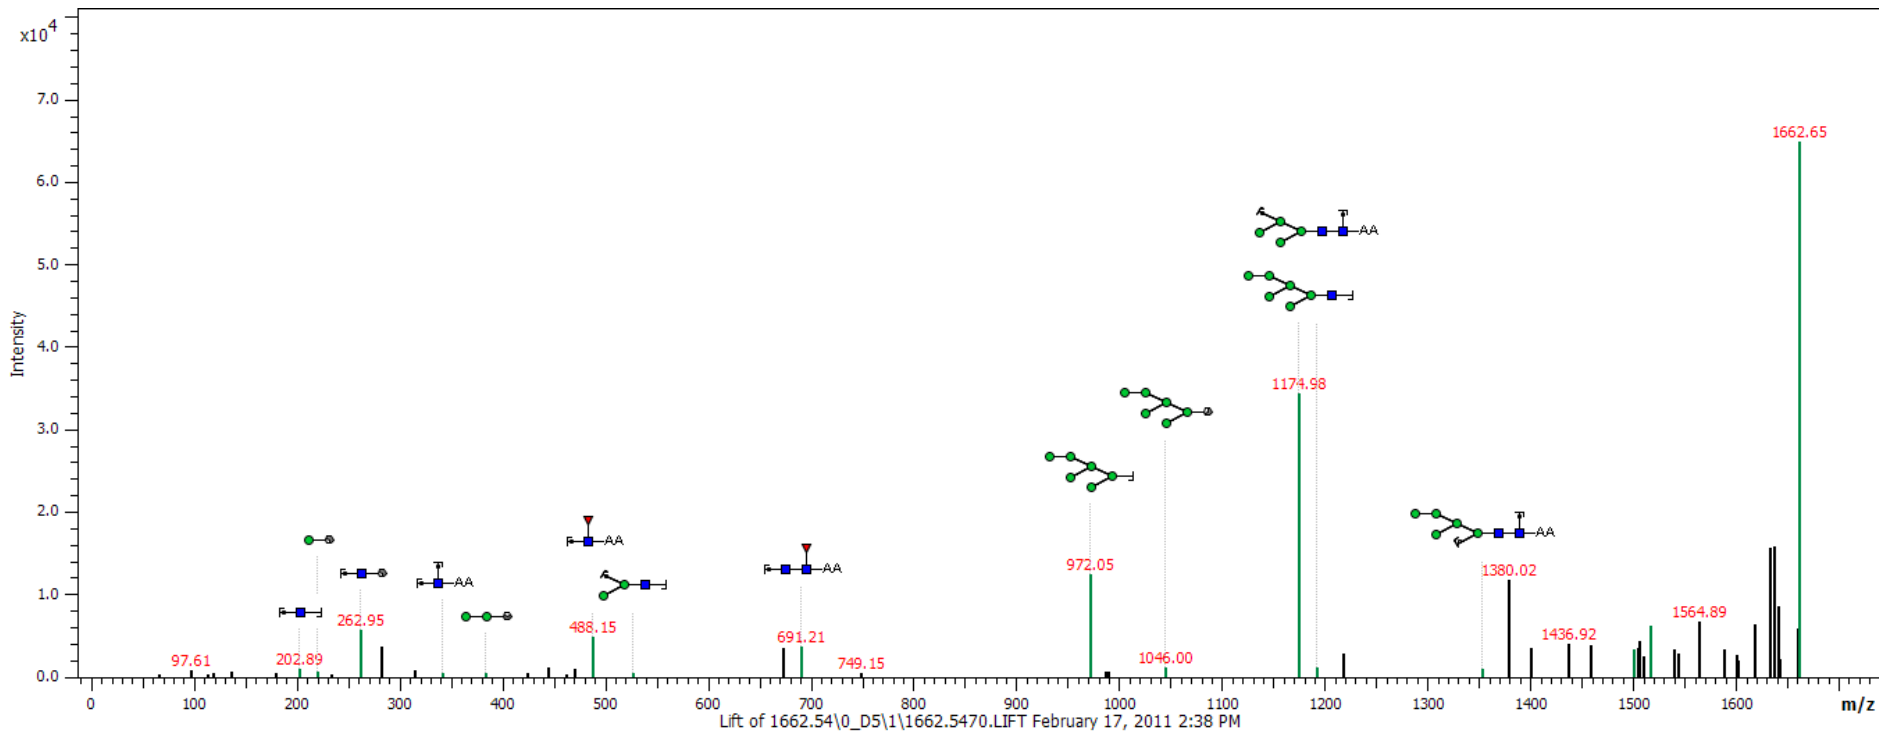



# Spectrum 39

## Glycan Search Report

Glycan: 25

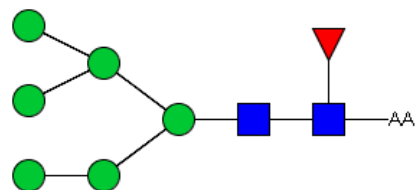

**Project path:** /N-glycans cancer/25143/comp\_25143\_01.mgf

**MS data:** K:/Cancer-CCR/N-glycans raw data\_MS/LC-MS of the discriminators/25143\_01.d/comp\_25143\_01.mgf

**Parent m/z:** 832.8057 2+

**Score:** 30.433

**Composition:** Hex6HexNAc2dHex1-AA

**Intensity coverage [%]:** 0.40

**Accession:** 29018

**Fragment coverage [%]:** 0.23

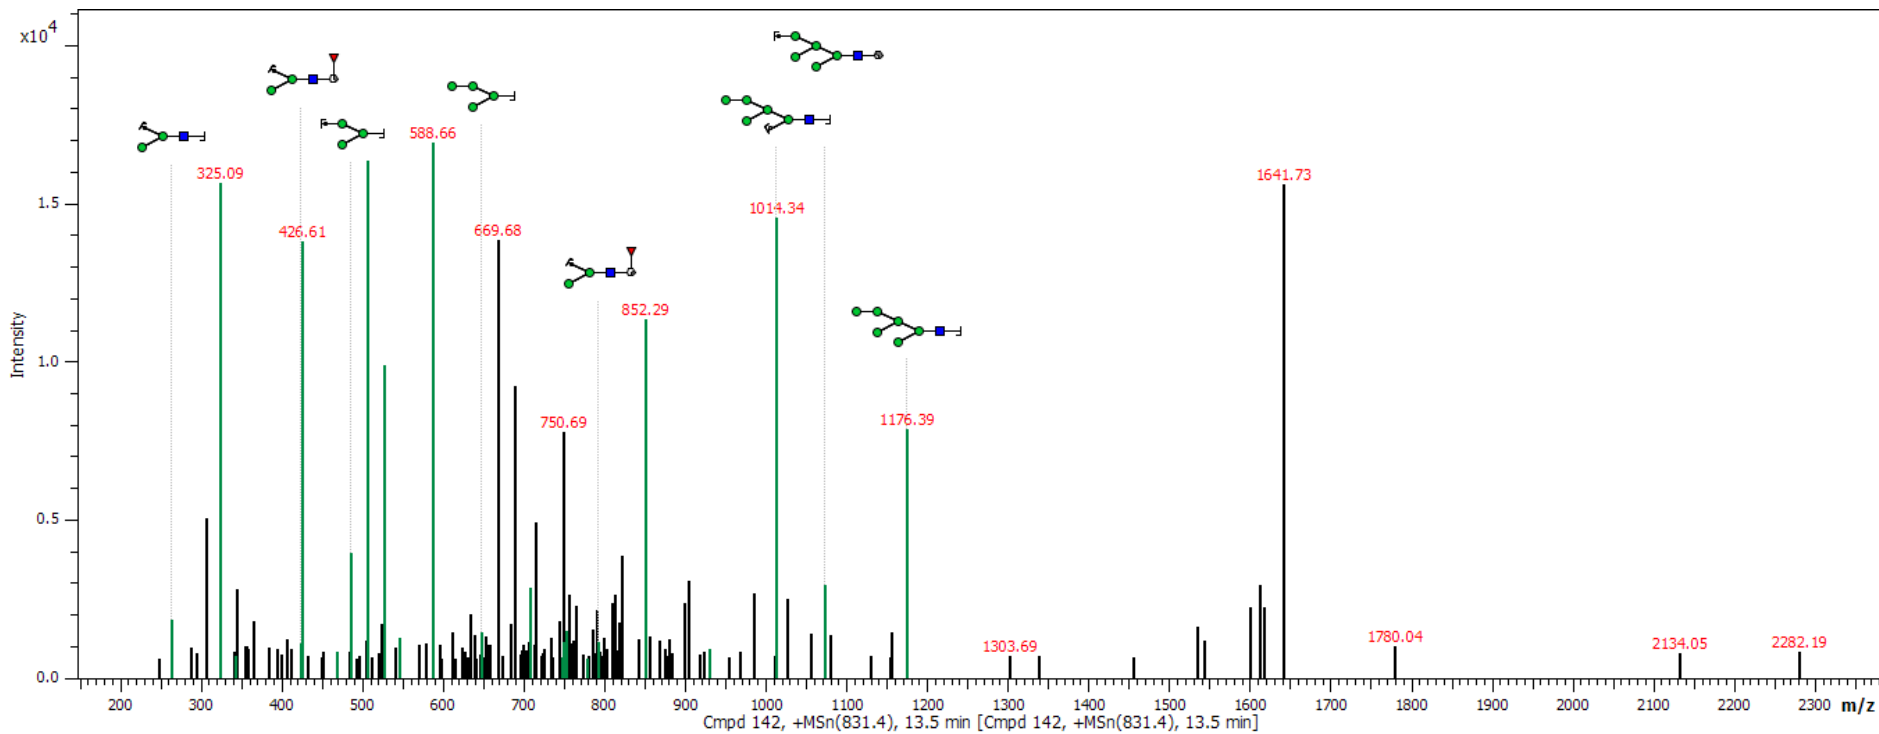



# Spectrum 40

## Glycan Search Report

Glycan: 2

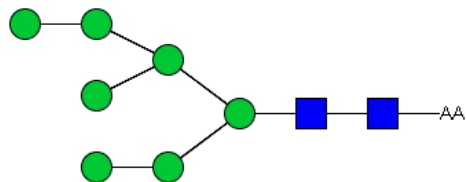

|                      |                                                                                                             |                                |        |
|----------------------|-------------------------------------------------------------------------------------------------------------|--------------------------------|--------|
| <b>Project path:</b> | /N-glycans cancer/Lift spectra 01/CombinedUNKNOWN                                                           |                                |        |
| <b>MS data:</b>      | c:/documents and settings/ciabalog/desktop/17-02-11/lift of 1678.69/0_e10/1/1678.6900.lift/1sref/pdata/1/1r |                                |        |
| <b>Parent m/z:</b>   | 1678.5844 -1                                                                                                | <b>Score:</b>                  | 42.308 |
| <b>Composition:</b>  | Hex7HexNAc2-AA                                                                                              | <b>Intensity coverage [%]:</b> | 0.61   |
| <b>Accession:</b>    | 2255                                                                                                        | <b>Fragment coverage [%]:</b>  | 0.29   |

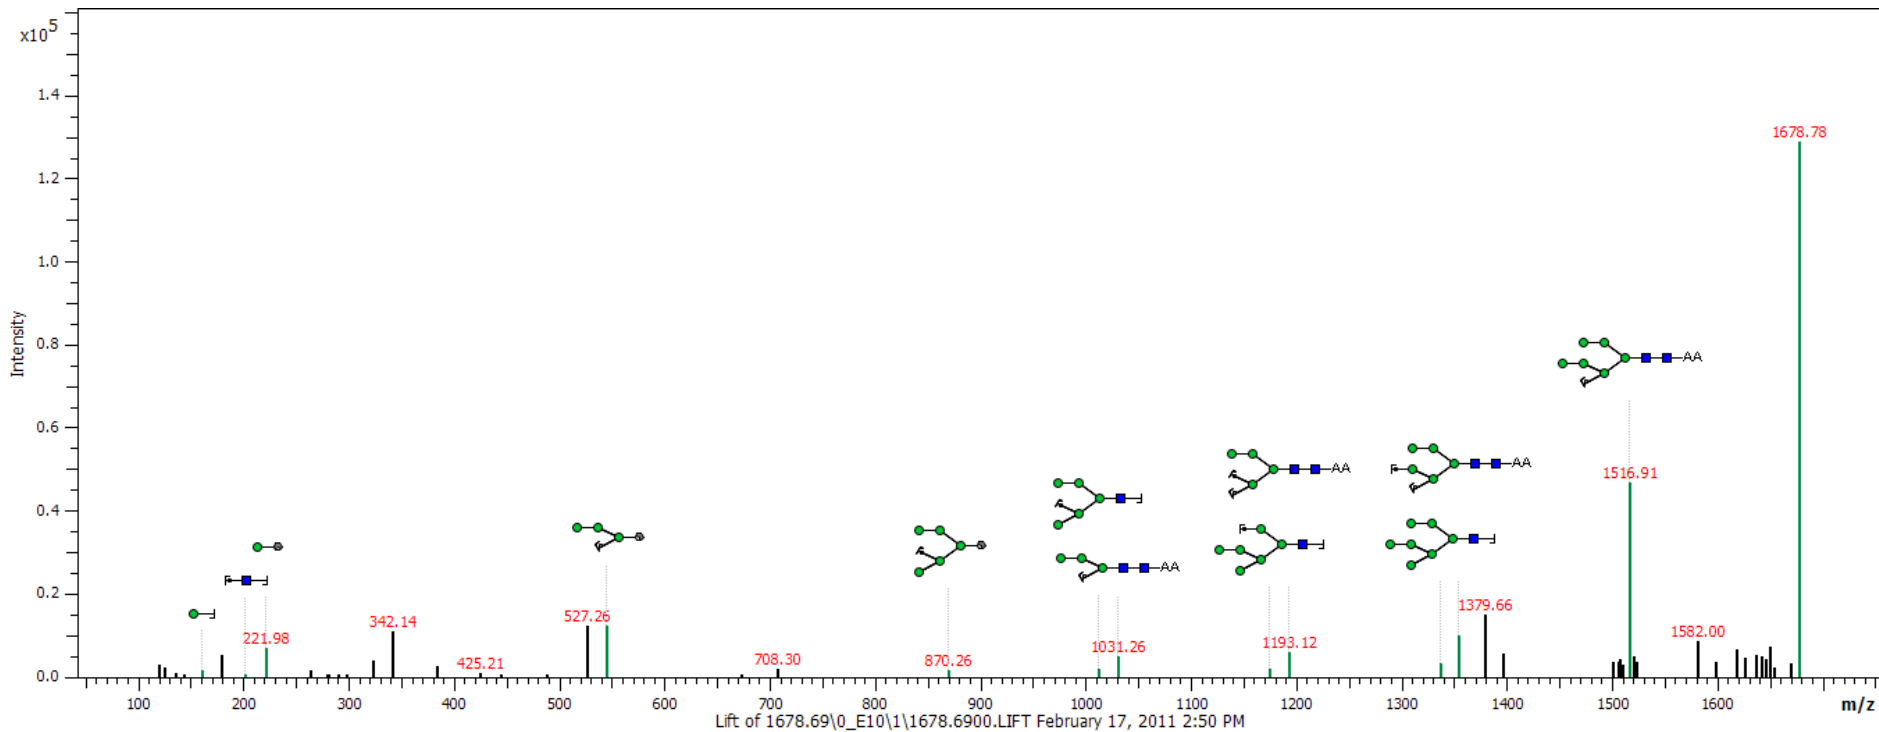



# Spectrum 41

## Glycan Search Report

Glycan: 6

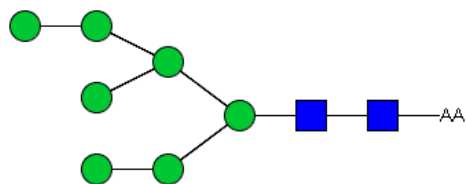

**Project path:** /N-glycans cancer/25147/comp\_25147.mgf  
**MS data:** K:/Cancer-CCR/N-glycans raw data\_MS/LC-MS of the discriminators/25147\_02.d/comp\_25147.mgf  
**Parent m/z:** 840.8031 2+ **Score:** 53.720  
**Composition:** Hex7HexNAc2-AA **Intensity coverage [%]:** 0.72  
**Accession:** 9035 **Fragment coverage [%]:** 0.40

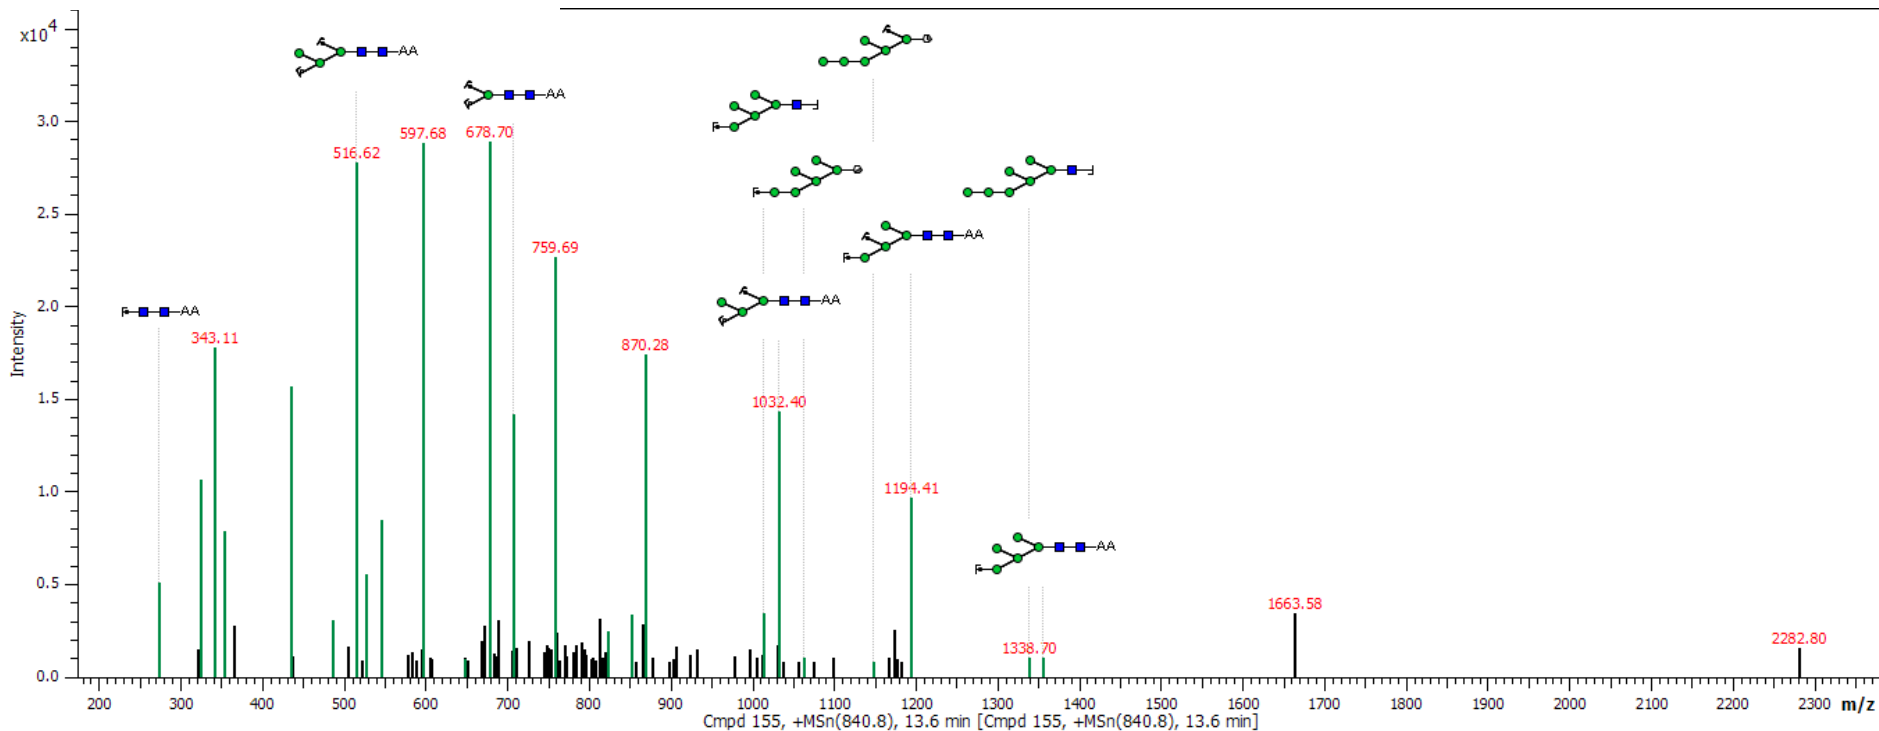



# Spectrum 42

## Glycan Search Report

Glycan: 4

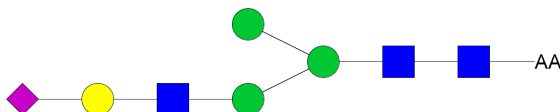

**Project path:** /N-glycans cancer/25141/comp\_25141.mgf

**MS data:** K:/Cancer-CCR/N-glycans raw data\_MS/LC-MS of the discriminators/25141\_01.d/comp\_25141.mgf

**Parent m/z:** 844.8113 2+

**Score:** 57.766

**Composition:** Hex4HexNAc3NeuAc1-AA

**Intensity coverage [%]:** 0.93

**Accession:** 13311

**Fragment coverage [%]:** 0.36

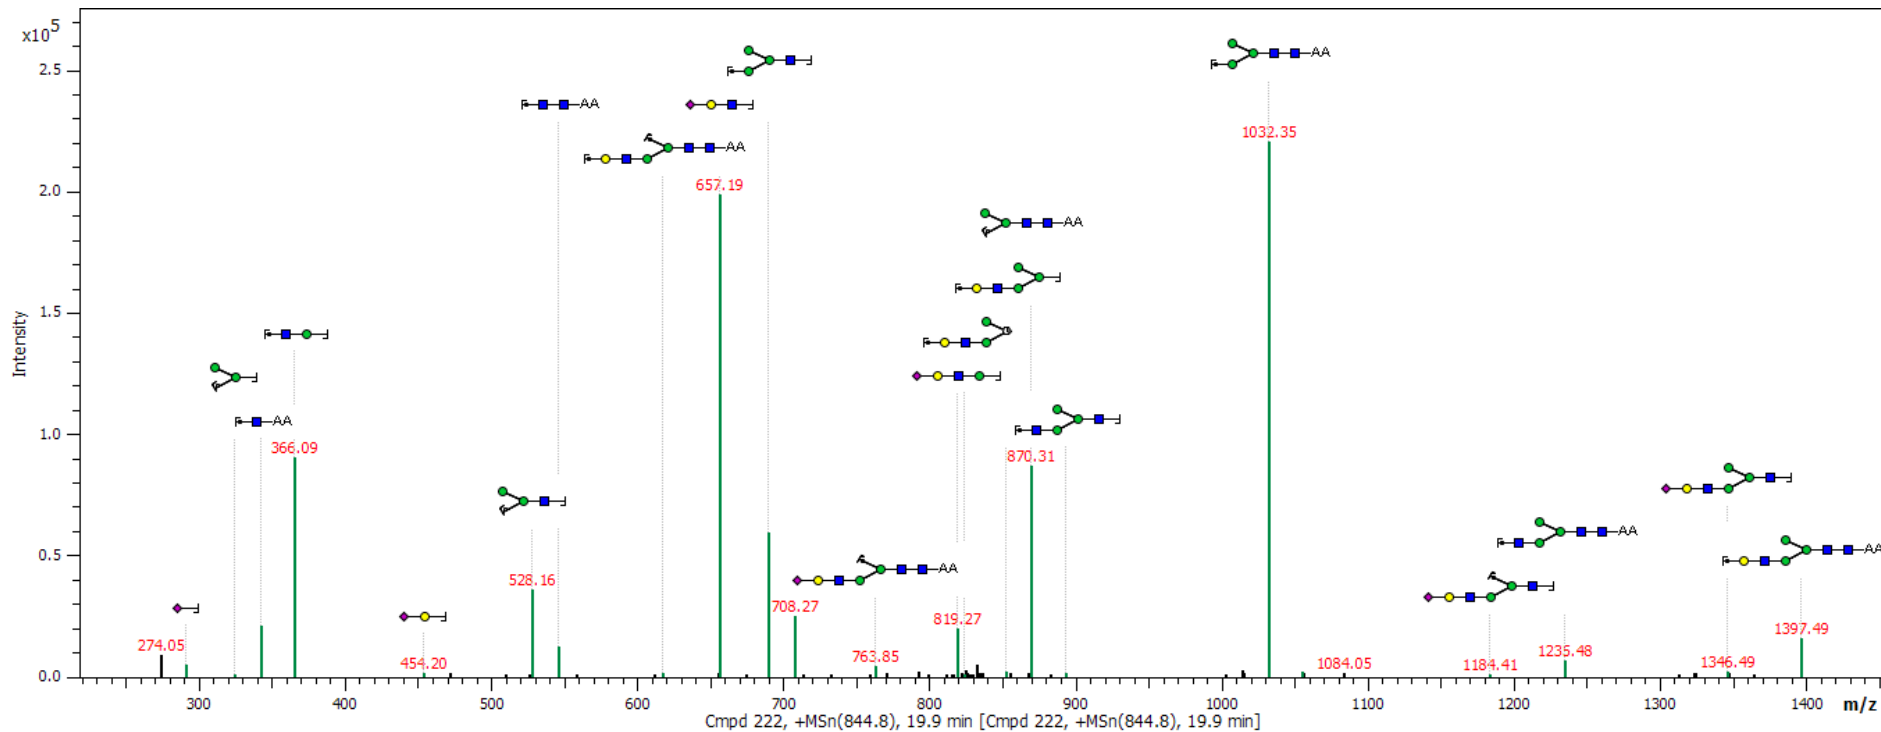



# Spectrum 43

## Glycan Search Report

Glycan: 10

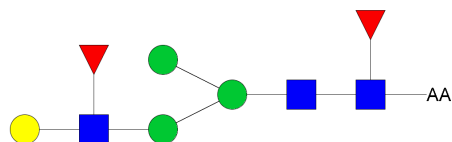

**Project path:** /N-glycans cancer/25145/comp\_25145.mgf

**MS data:** K:/Cancer-CCR/N-glycans raw data\_MS/LC-MS of the discriminators/25145\_02.d/comp\_25145.mgf

**Parent m/z:** 845.3215 2+

**Score:** 64.962

**Composition:** Hex4HexNAc3dHex2-AA

**Intensity coverage [%]:** 0.64

**Accession:** 36367

**Fragment coverage [%]:** 0.66

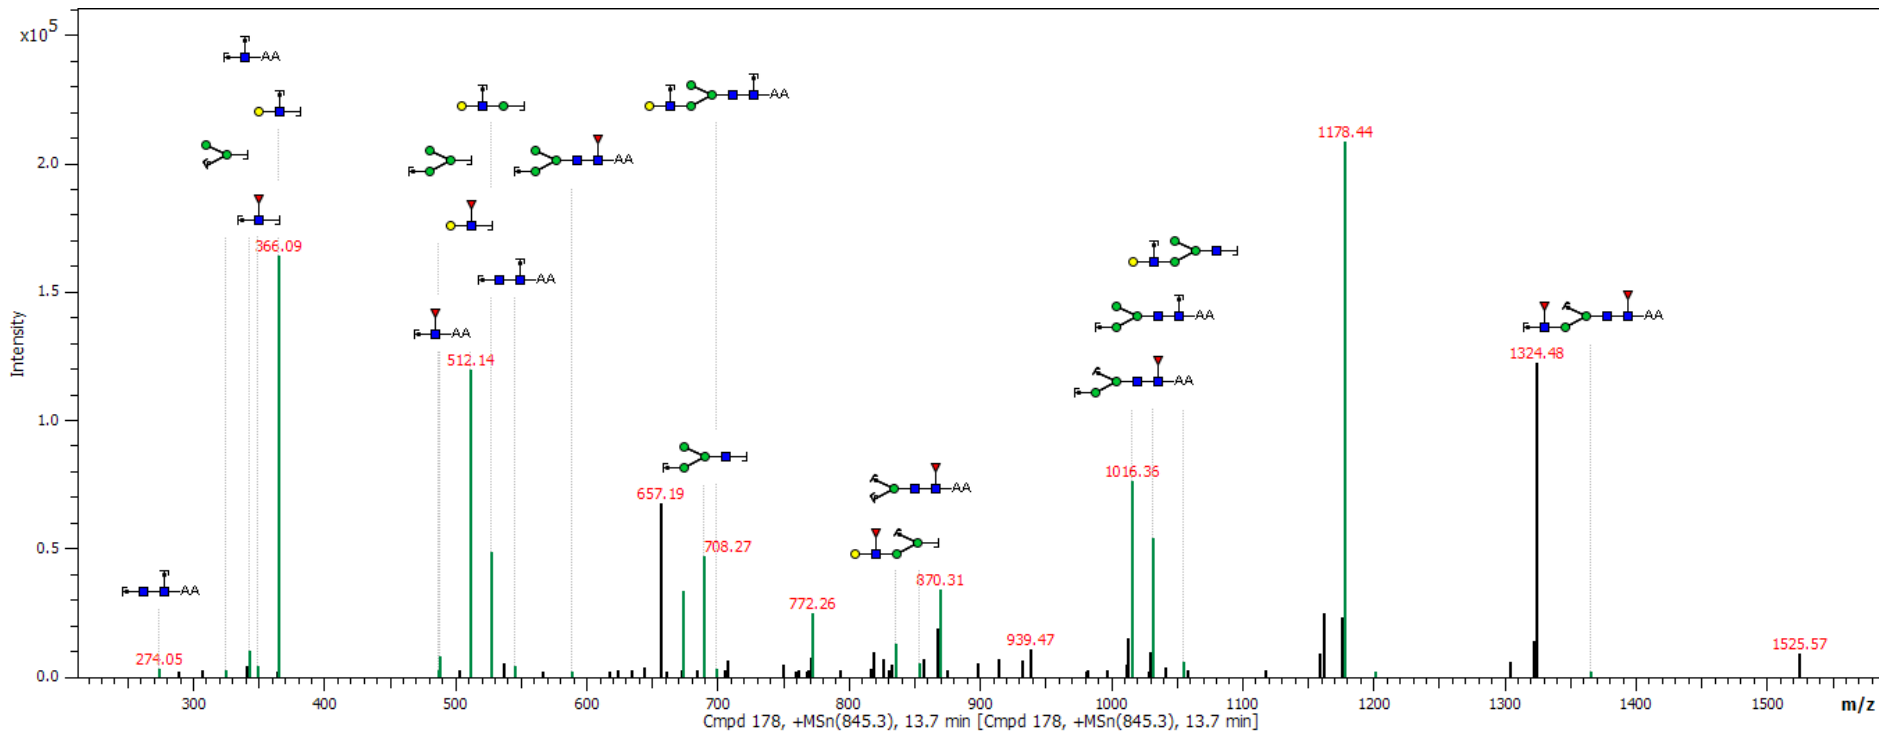



# Spectrum 44

## Glycan Search Report

Glycan: 24

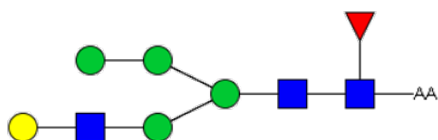

**Project path:** /N-glycans cancer/25147/comp\_25147.mgf  
**MS data:** K:/Cancer-CCR/N-glycans raw data\_MS/LC-MS of the discriminators/25147\_02.d/comp\_25147.mgf  
**Parent m/z:** 853.3190 2+      **Score:** 24.121  
**Composition:** Hex5HexNAc3dHex1-AA      **Intensity coverage [%]:** 0.46  
**Accession:** 29095      **Fragment coverage [%]:** 0.13

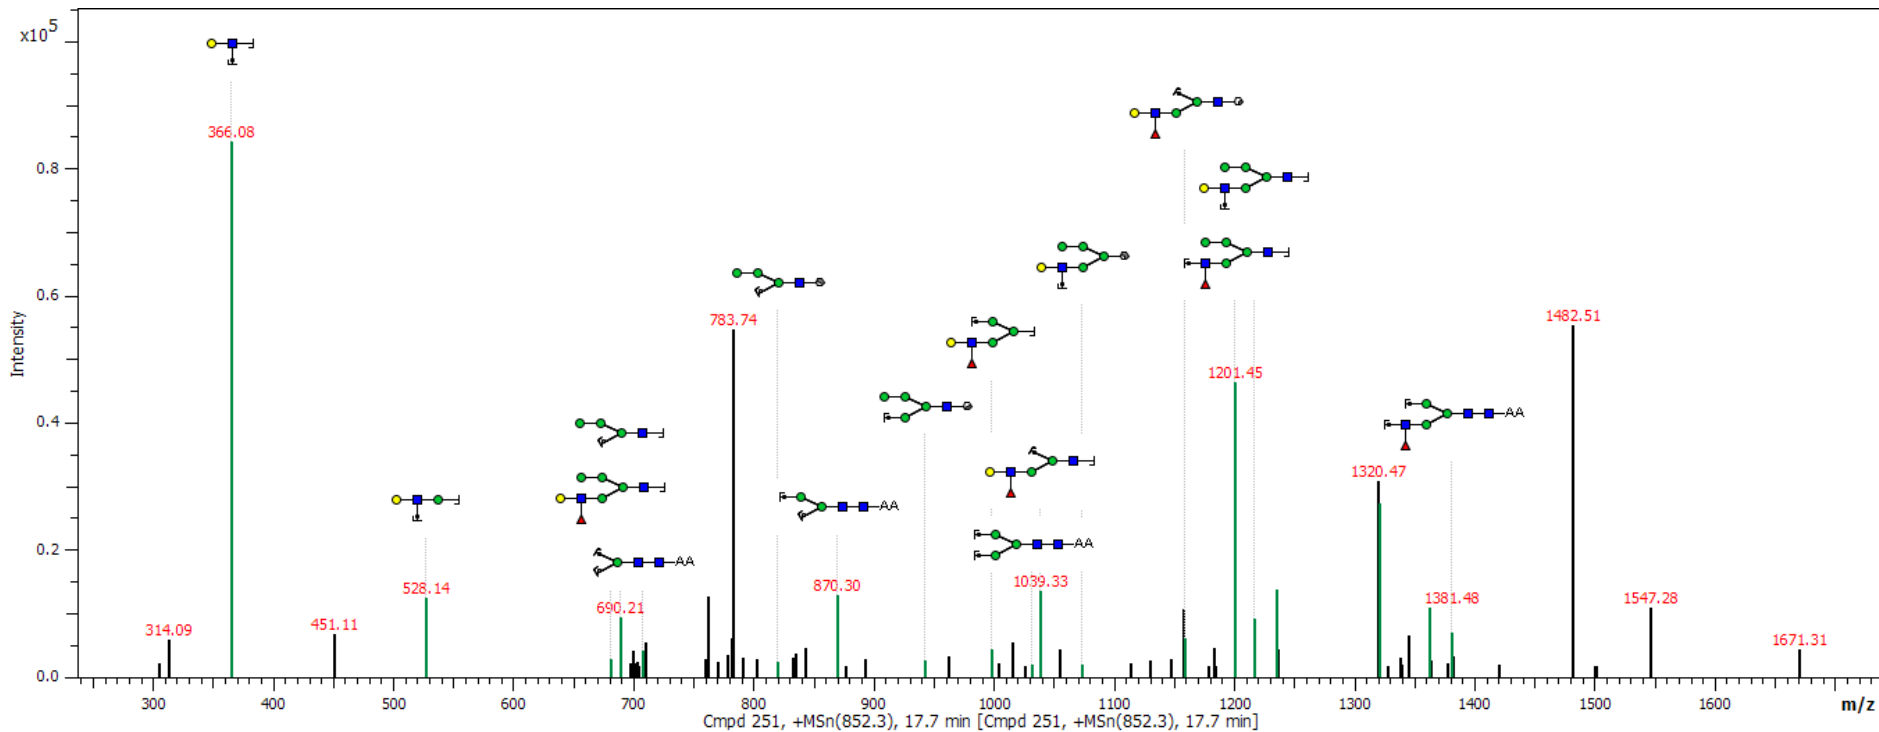





# Spectrum 45

## Glycan Search Report

Glycan: 17

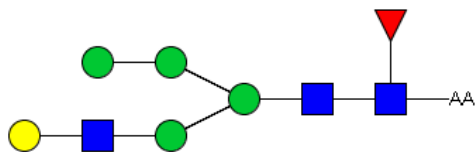

Project path: /N-glycans cancer/25145/comp\_25145.mgf

MS data: K:/Cancer-CCR/N-glycans raw data\_MS/LC-MS of the discriminators/25145\_02.d/comp\_25145.mgf

Parent m/z: 853.3190 2+

Score: 42.735

Composition: Hex5HexNAc3dHex1-AA

Intensity coverage [%]: 0.70

Accession: 8033

Fragment coverage [%]: 0.26

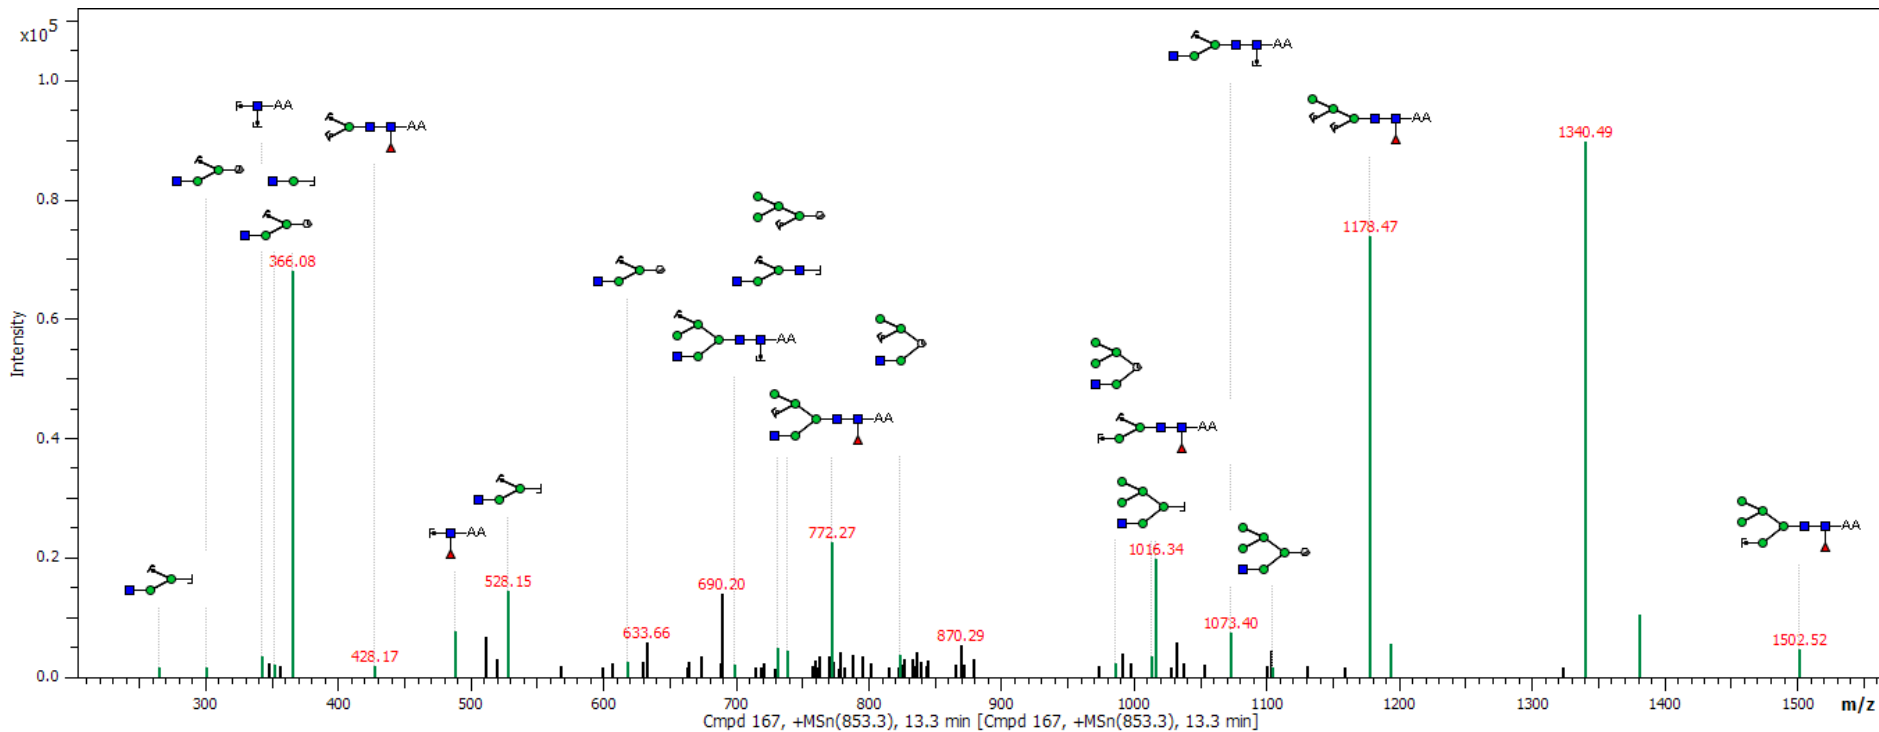



# Spectrum 46

## Glycan Search Report

Glycan: 3

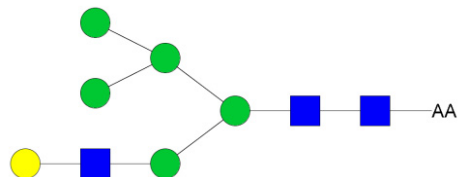

**Project path:** /N-glycans cancer/Lift spectra 01/CombinedUNKNOWN  
**MS data:** c:/documents and settings/ciabalog/desktop/17-02-11/17-02-11/lift of 1719.623/0\_f8/1/1719.6230.lift/1sref/pdata/1/1r  
**Parent m/z:** 1719.6110 -1      **Score:** 41.687  
**Composition:** Hex6HexNAc3-AA      **Intensity coverage [%]:** 0.38  
**Accession:** 36317      **Fragment coverage [%]:** 0.46

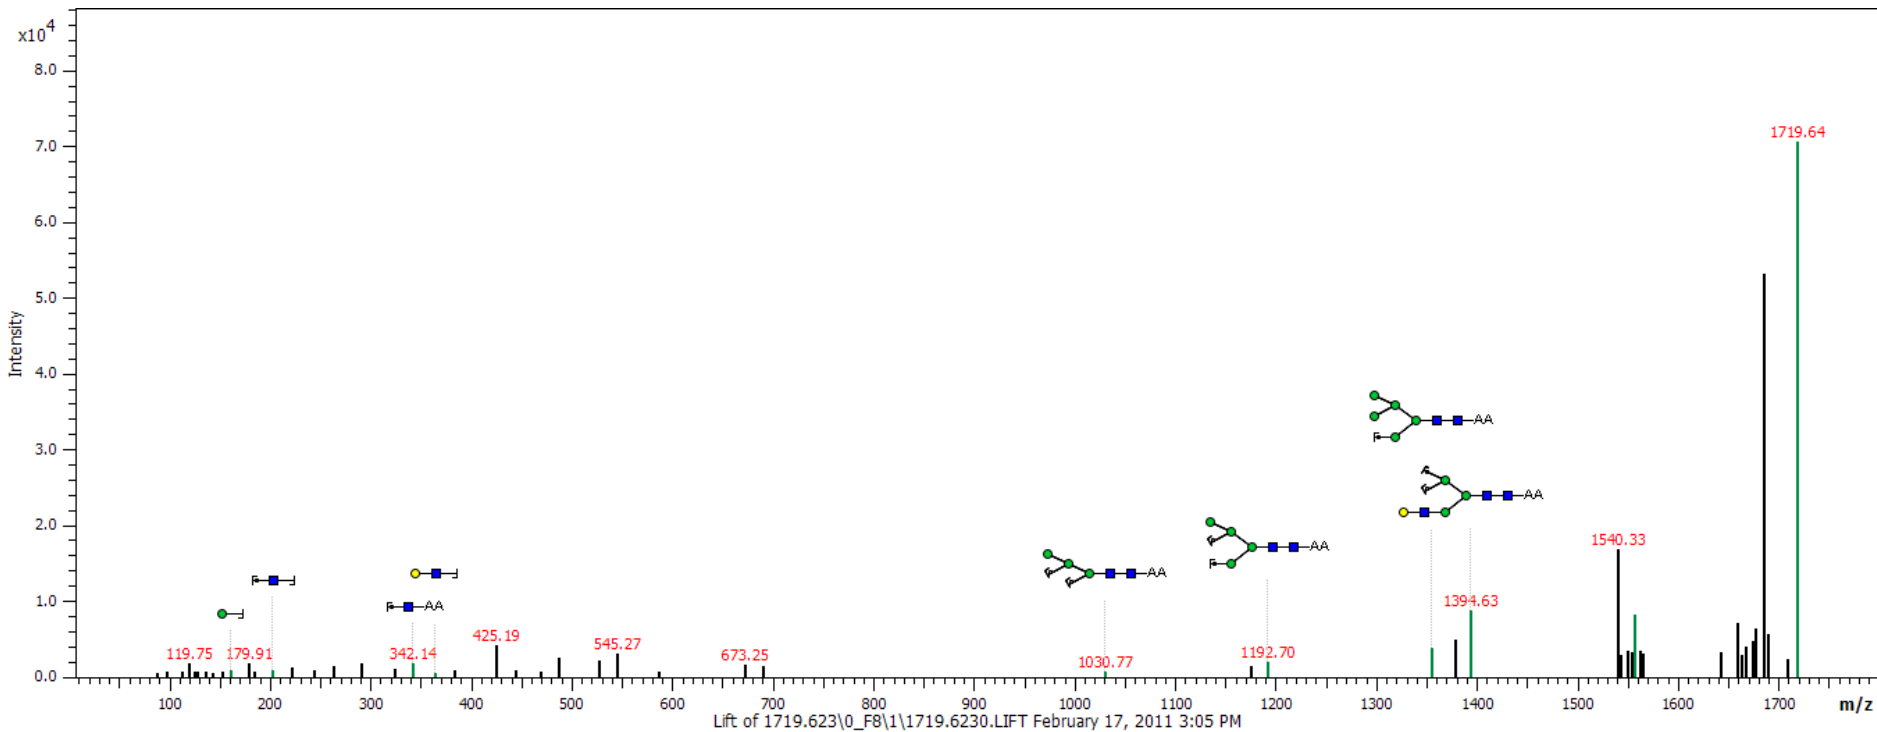



# Spectrum 47

## Glycan Search Report

Glycan: 5

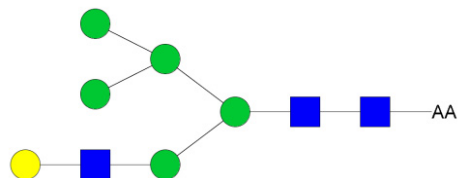

**Project path:** /N-glycans cancer/25143/comp\_25143\_01.mgf  
**MS data:** K:/Cancer-CCR/N-glycans raw data\_MS/LC-MS of the discriminators/25143\_01.d/comp\_25143\_01.mgf  
**Parent m/z:** 861.3164 2+      **Score:** 70.455  
**Composition:** Hex6HexNAc3-AA      **Intensity coverage [%]:** 0.87  
**Accession:** 36317      **Fragment coverage [%]:** 0.57

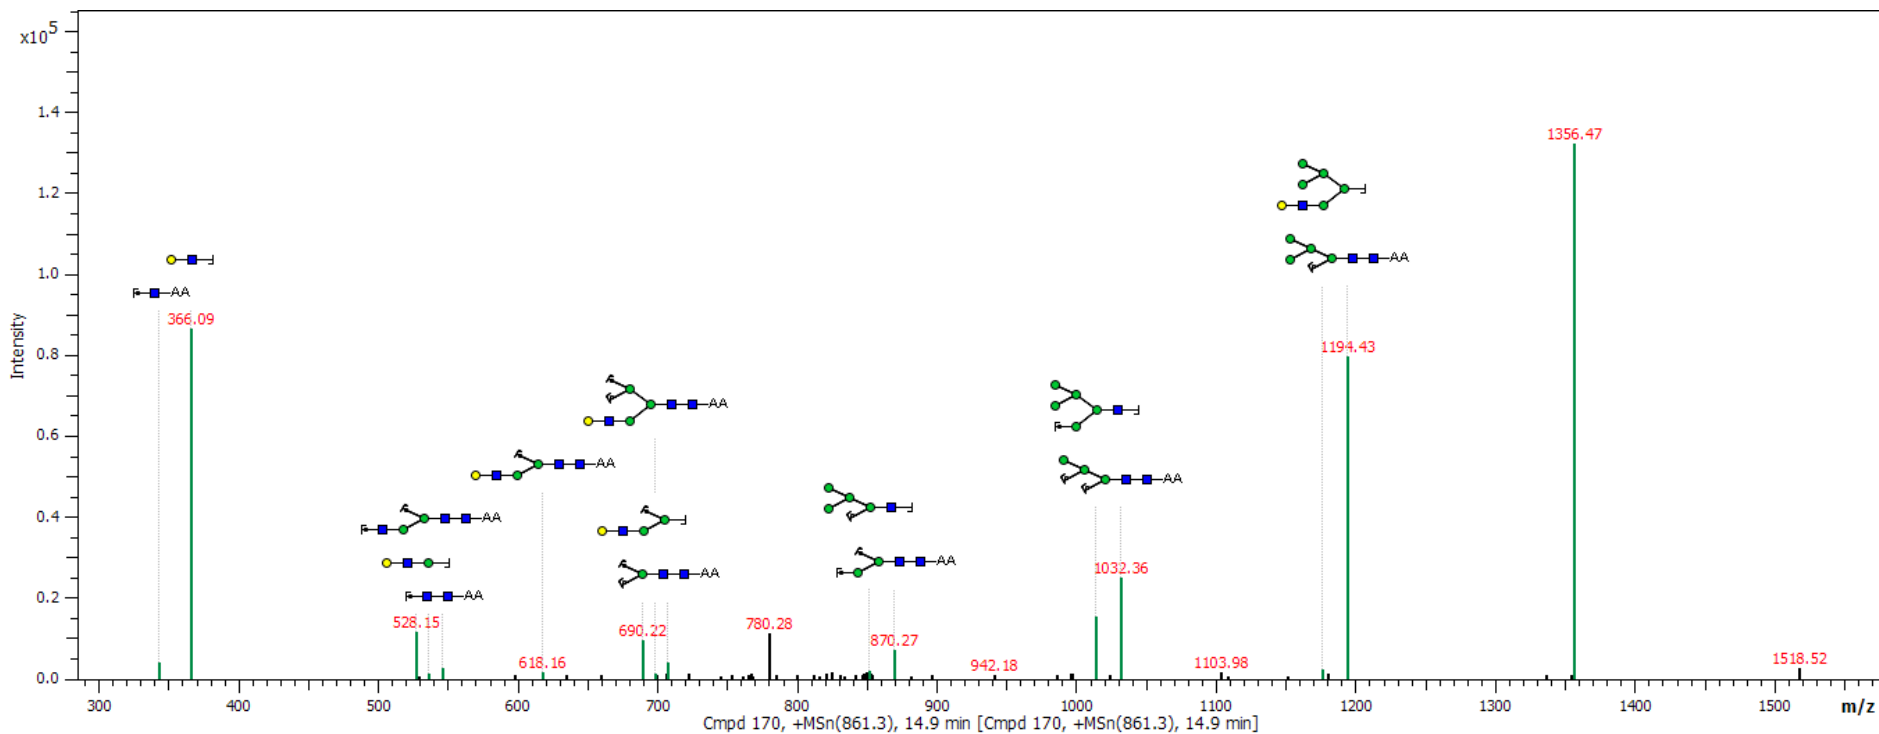

# Spectrum 48

ESI MS/MS of 865.8 [M+2H]<sup>2+</sup>  
dHex2Hex3HexNAc4-AA

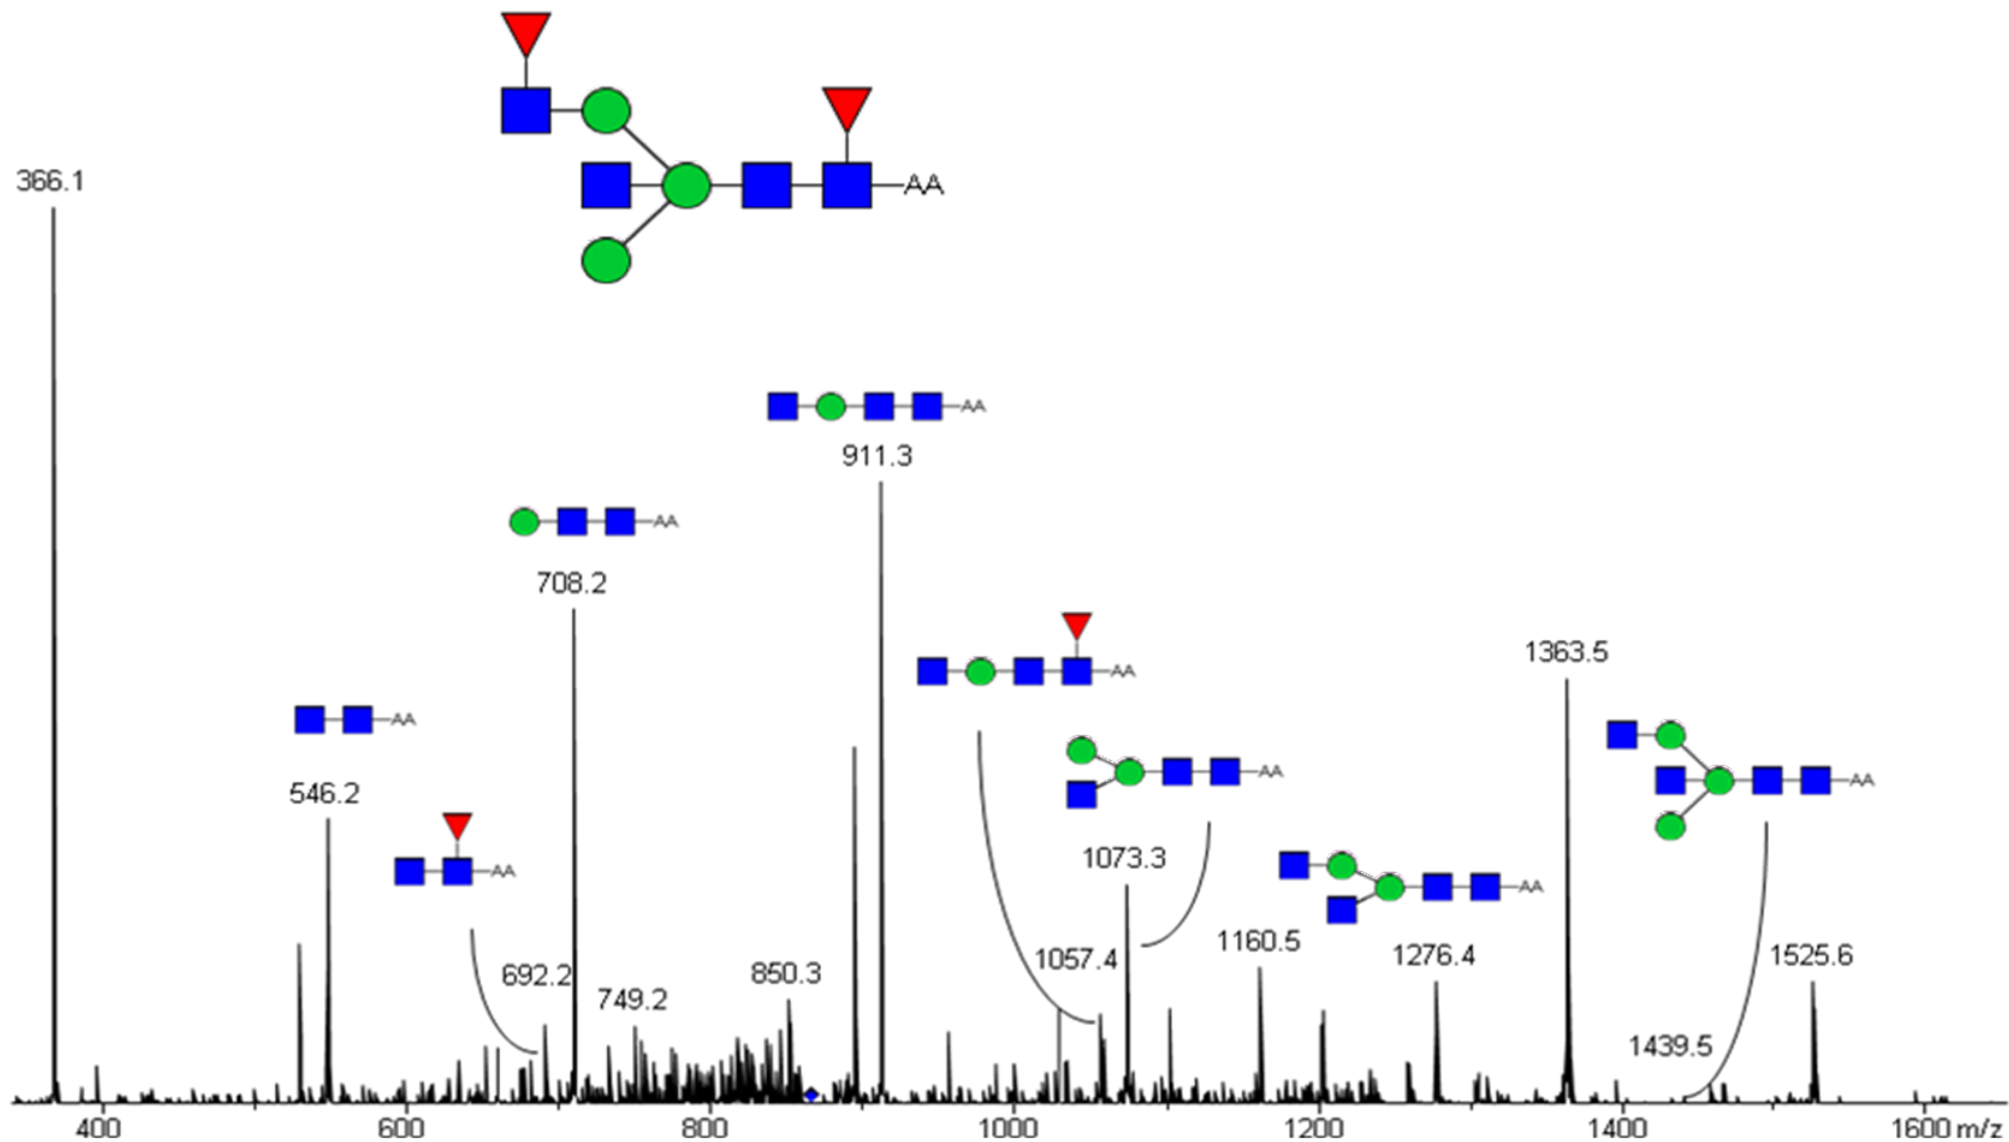



# Spectrum 49

## Glycan Search Report

Glycan: 9

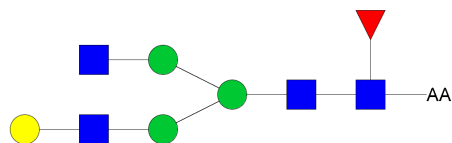

**Project path:** /N-glycans cancer/Lift spectra/CombinedLIFT

**MS data:** c:/documents and settings/ciabalog/desktop/new folder/lift of 1744\_fraction54/0\_b19/1/1744.6000.lift/1sref/pdata/1/1r

**Parent m/z:** 1744.6427 -1

**Score:** 47.279

**Composition:** Hex4HexNAc4dHex1-AA

**Intensity coverage [%]:** 0.38

**Accession:** 36233

**Fragment coverage [%]:** 0.58

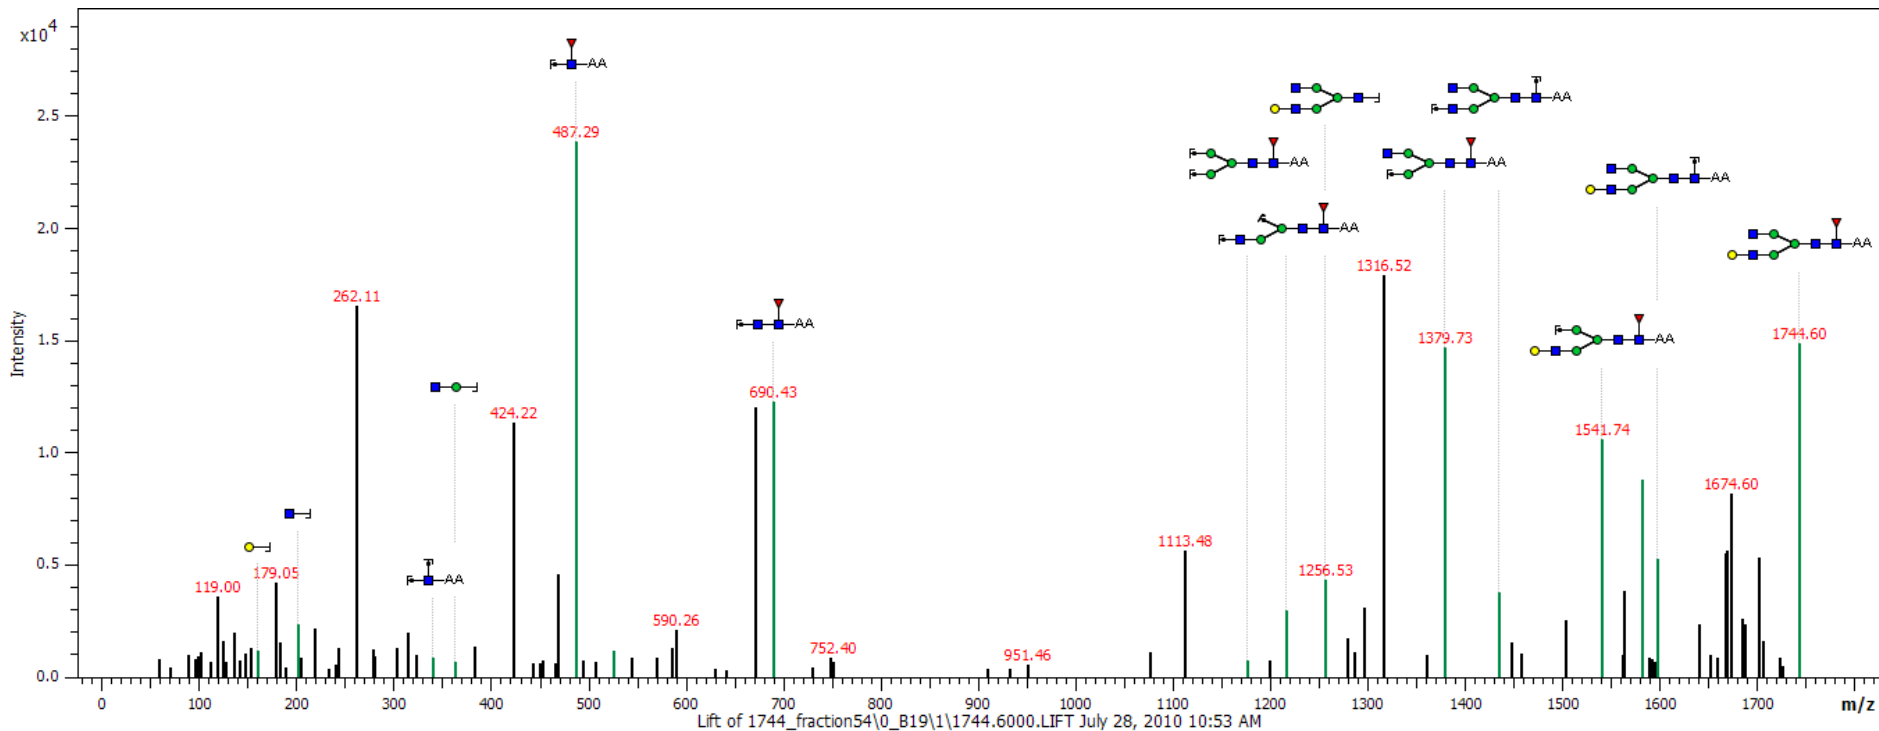



# Spectrum 50

## Glycan Search Report

Glycan: 1



**Project path:** /N-glycans cancer/25141/comp\_25141.mgf

**MS data:** K:/Cancer-CCR/N-glycans raw data\_MS/LC-MS of the discriminators/25141\_01.d/comp\_25141.mgf

**Parent m/z:** 873.8323 2+

**Score:** 89.230

**Composition:** Hex4HexNAc4dHex1-AA

**Intensity coverage [%]:** 0.95

**Accession:** 36233

**Fragment coverage [%]:** 0.84

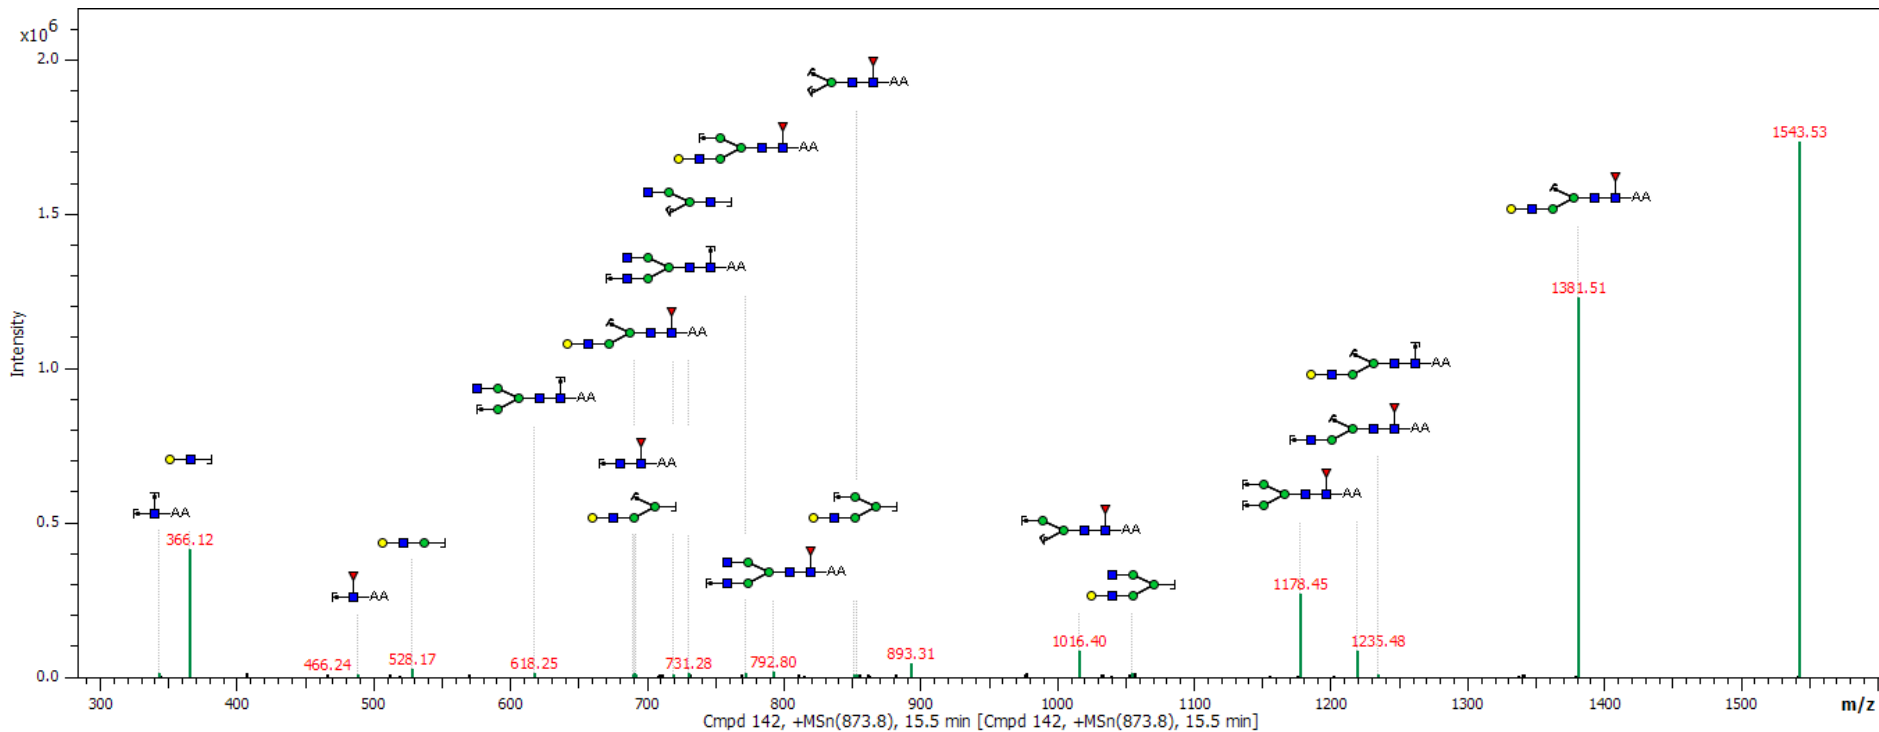



# Spectrum 51

## Glycan Search Report

Glycan: 19

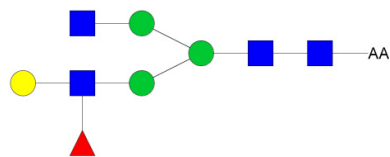

**Project path:** /N-glycans cancer/25145/comp\_25145.mgf

**MS data:** K:/Cancer-CCR/N-glycans raw data\_MS/LC-MS of the discriminators/25145\_02.d/comp\_25145.mgf

**Parent m/z:** 873.8323 2+

**Score:** 35.090

**Composition:** Hex4HexNAc4dHex1-AA

**Intensity coverage [%]:** 0.49

**Accession:** 29189

**Fragment coverage [%]:** 0.25

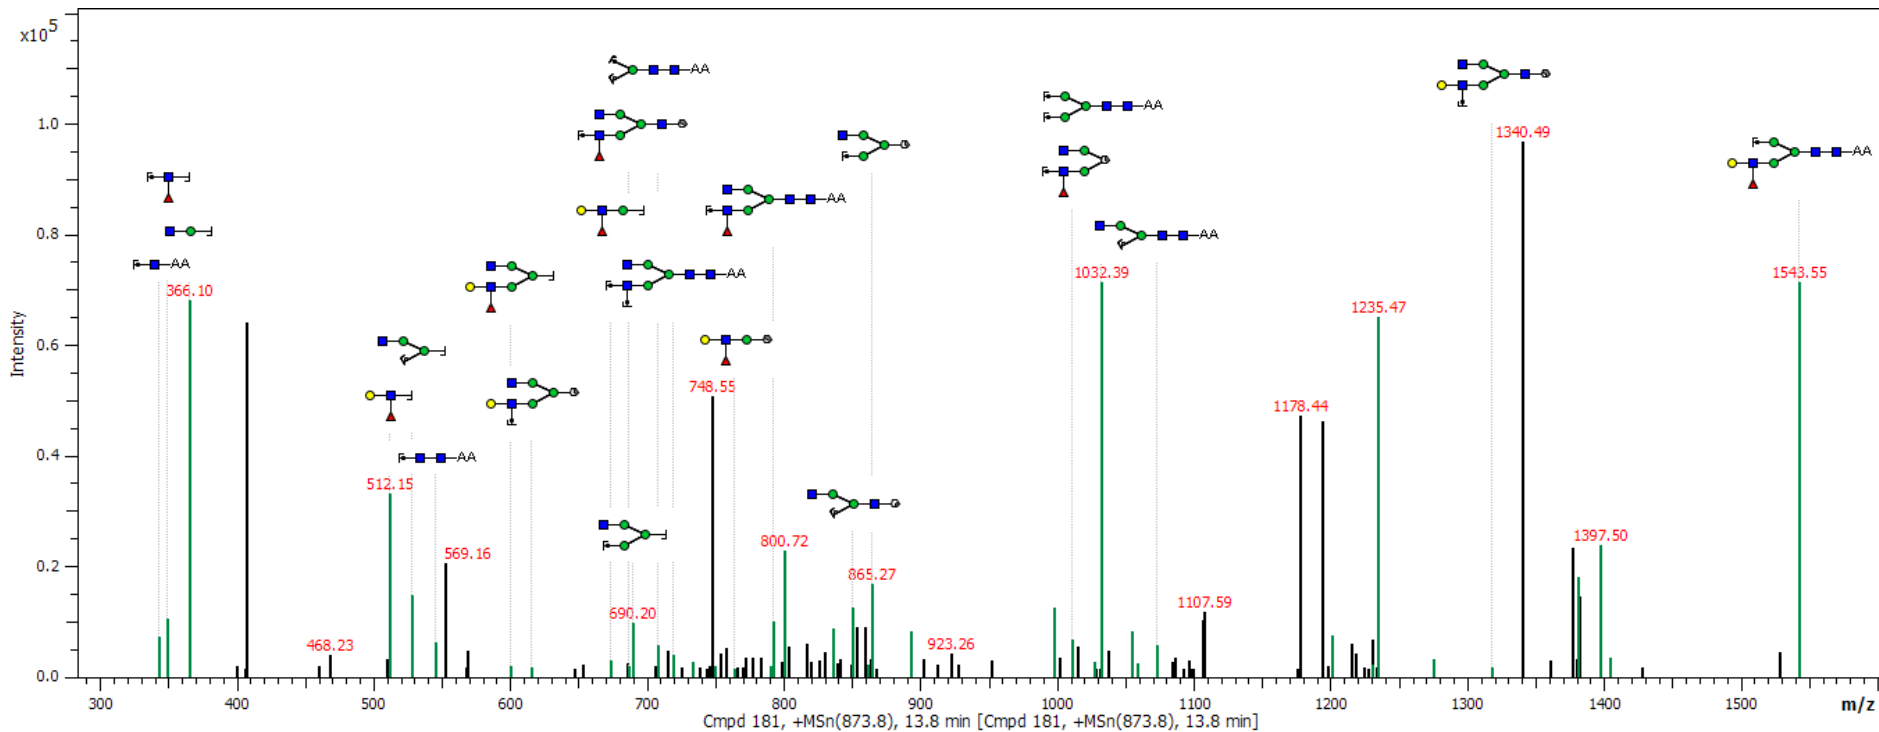



# Spectrum 52

## Glycan Search Report

Glycan: 2

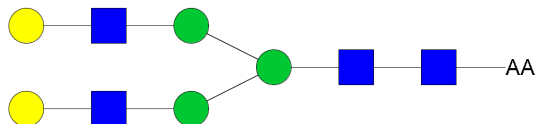

**Project path:** /N-glycans cancer/25145/comp\_25145.mgf  
**MS data:** K:/Cancer-CCR/N-glycans raw data\_MS/LC-MS of the discriminators/25145\_02.d/comp\_25145.mgf  
**Parent m/z:** 881.8297 2+ **Score:** 86.713  
**Composition:** Hex5HexNAc4-AA **Intensity coverage [%]:** 0.96  
**Accession:** 32132 **Fragment coverage [%]:** 0.79

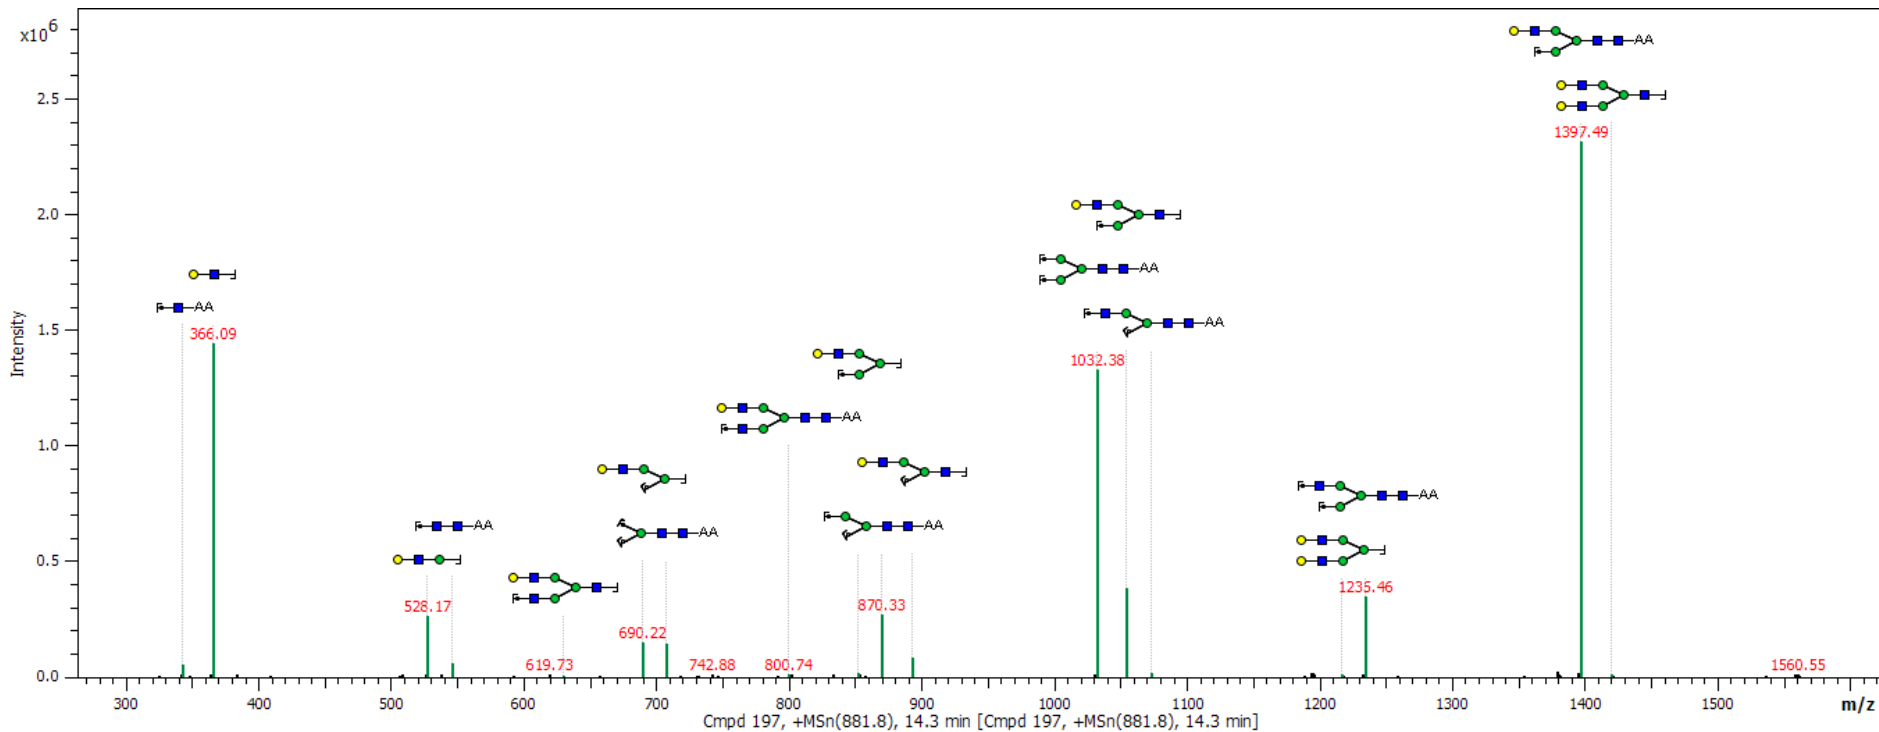



# Spectrum 53

## MS/MS 1767.7 [M-H]<sup>1-</sup>

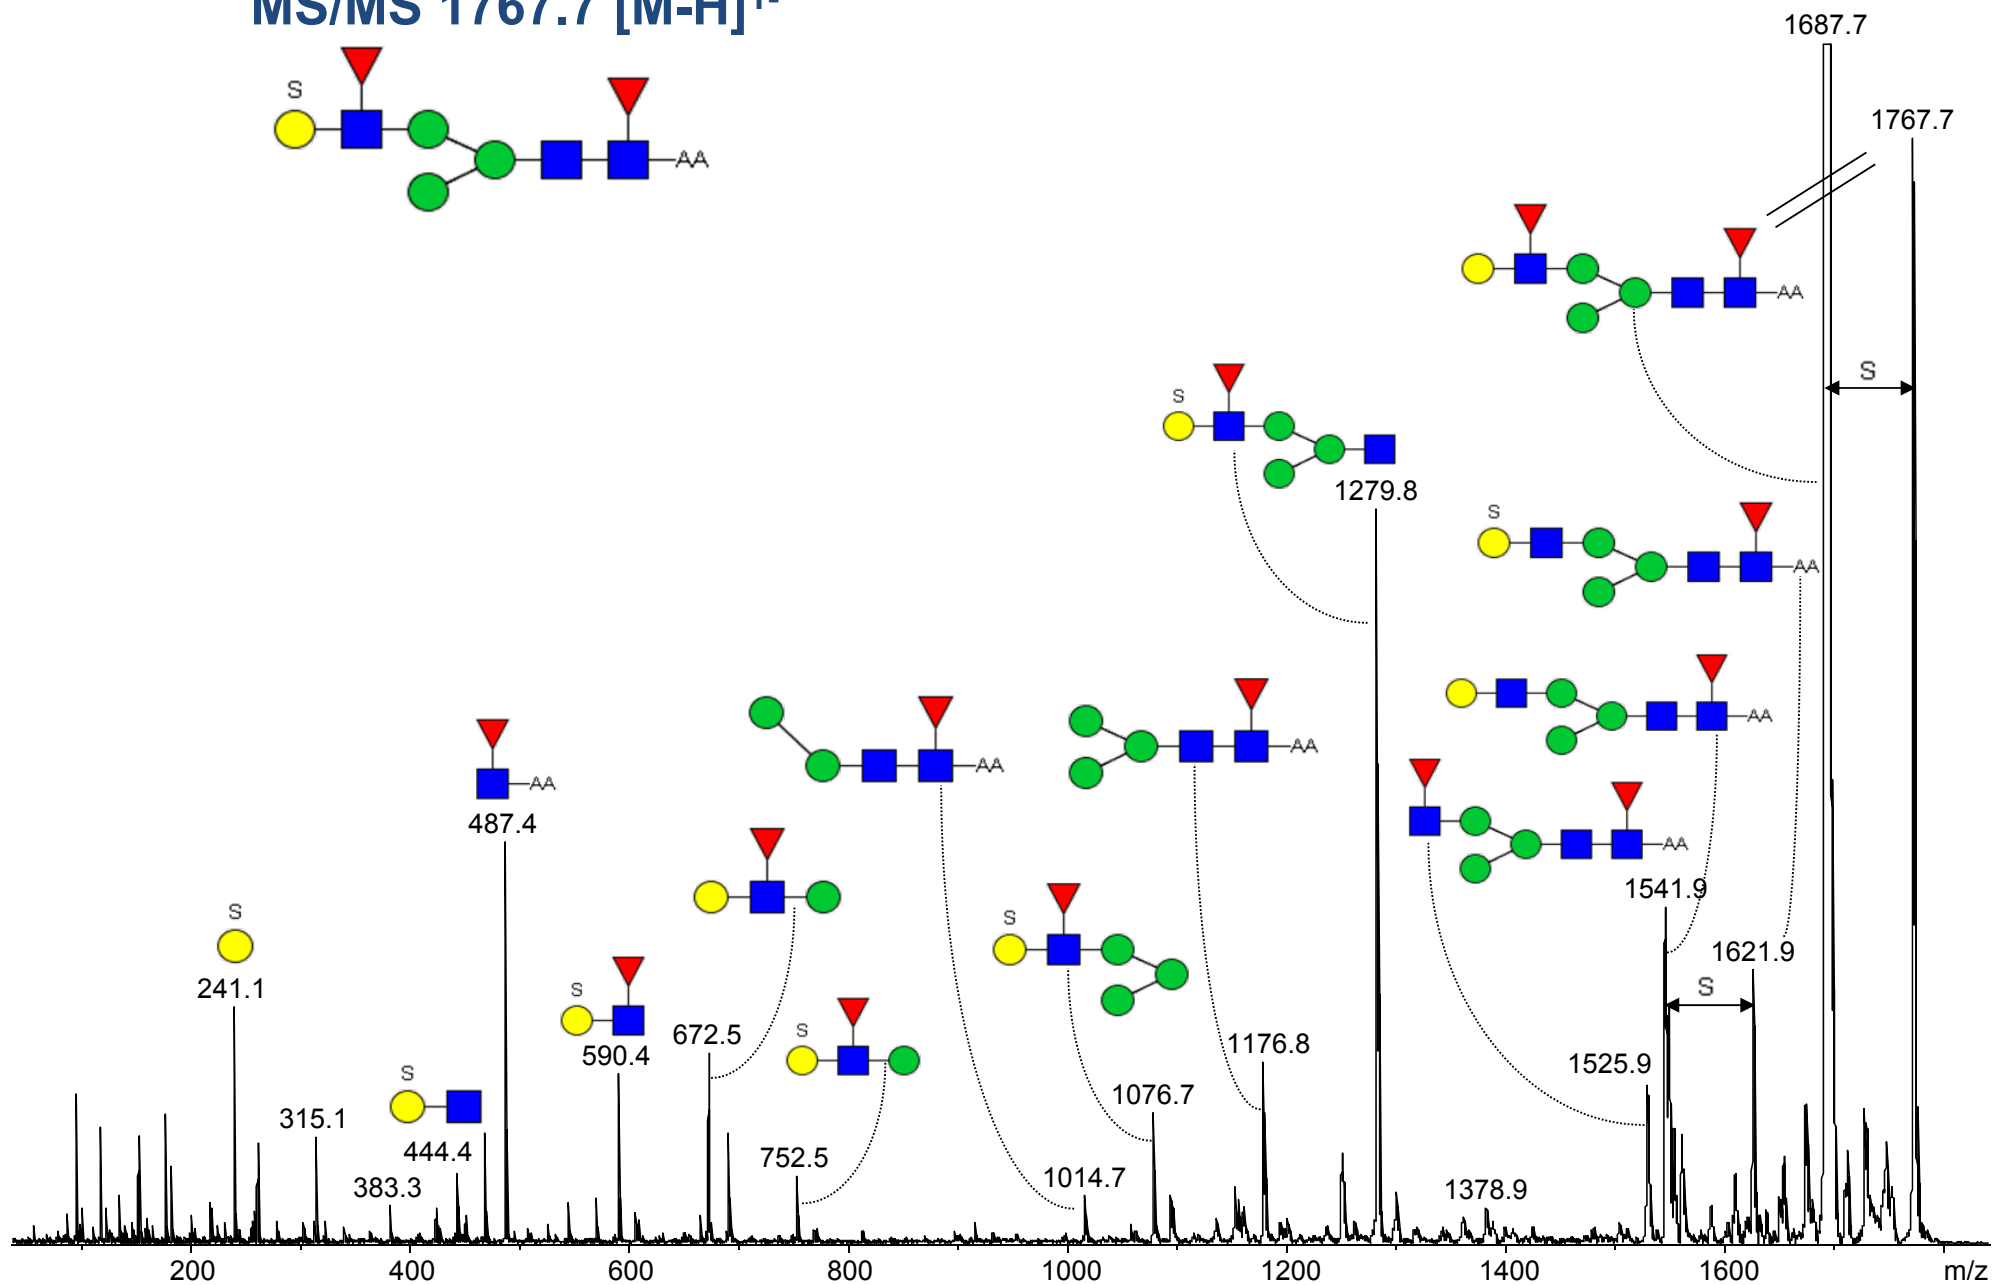

# Spectrum 54

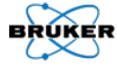

## Glycan Search Report

Glycan: 11

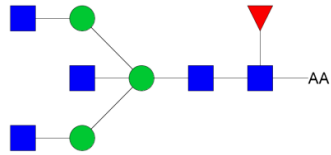

**Project path:** /N-glycans cancer/Lift spectra/CombinedLIFT  
**MS data:** c:/documents and settings/ciabalog/desktop/new folder/lift of 1785\_fraction51/0\_b16/1/1785.7000.lift/ 1sref/pdata/1/1r  
**Parent m/z:** 1785.6693 -1      **Score:** 42.446  
**Composition:** Hex3HexNAc5dHex1-AA      **Intensity coverage [%]:** 0.55  
**Accession:** 1040      **Fragment coverage [%]:** 0.33

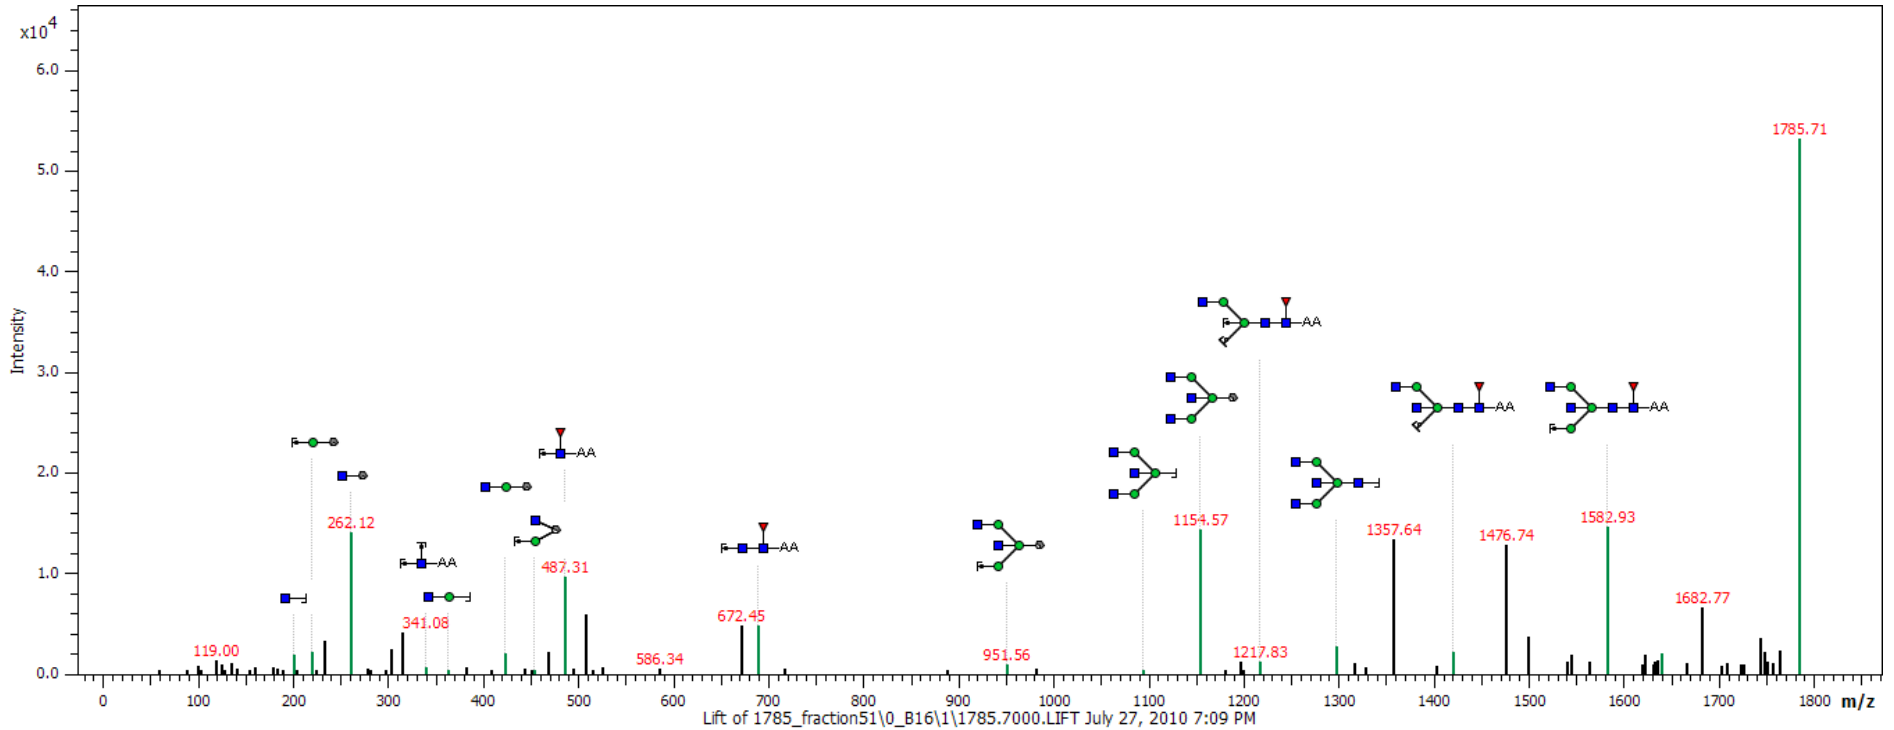

# Spectrum 55



## Glycan Search Report

Glycan: 7

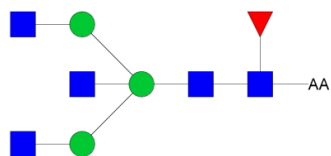

**Project path:** /N-glycans cancer/25142/comp\_25142\_01.mgf  
**MS data:** K:/Cancer-CCR/N-glycans raw data\_MS/LC-MS of the discriminators/25142\_01.d/comp\_25142\_01.mgf  
**Parent m/z:** 894.3456 2+ **Score:** 35.761  
**Composition:** Hex3HexNAc5dHex1-AA **Intensity coverage [%]:** 0.47  
**Accession:** 1040 **Fragment coverage [%]:** 0.27

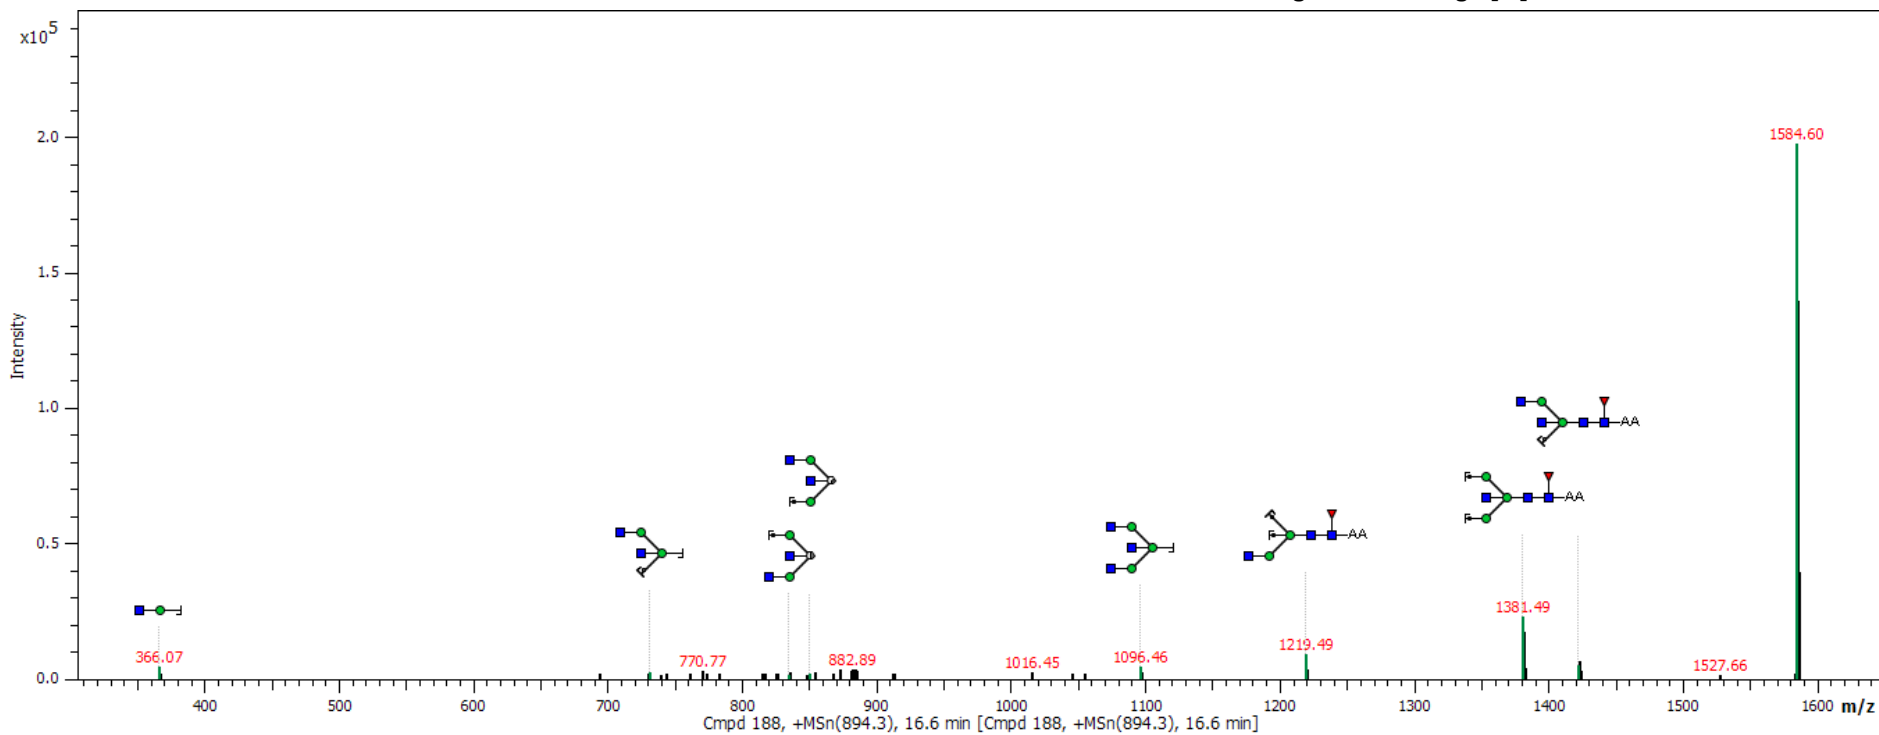

# Spectrum 56

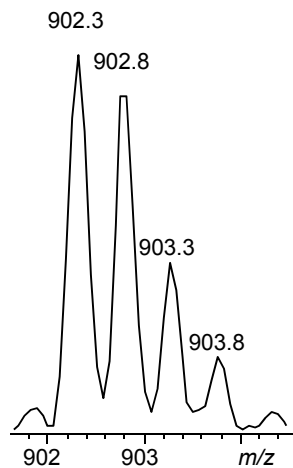

ESI MS/MS of  $[902.2+2H]^{2+}$

Hex4HexNAc5-AA

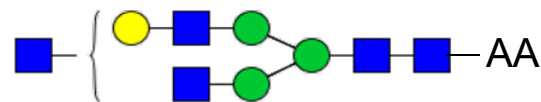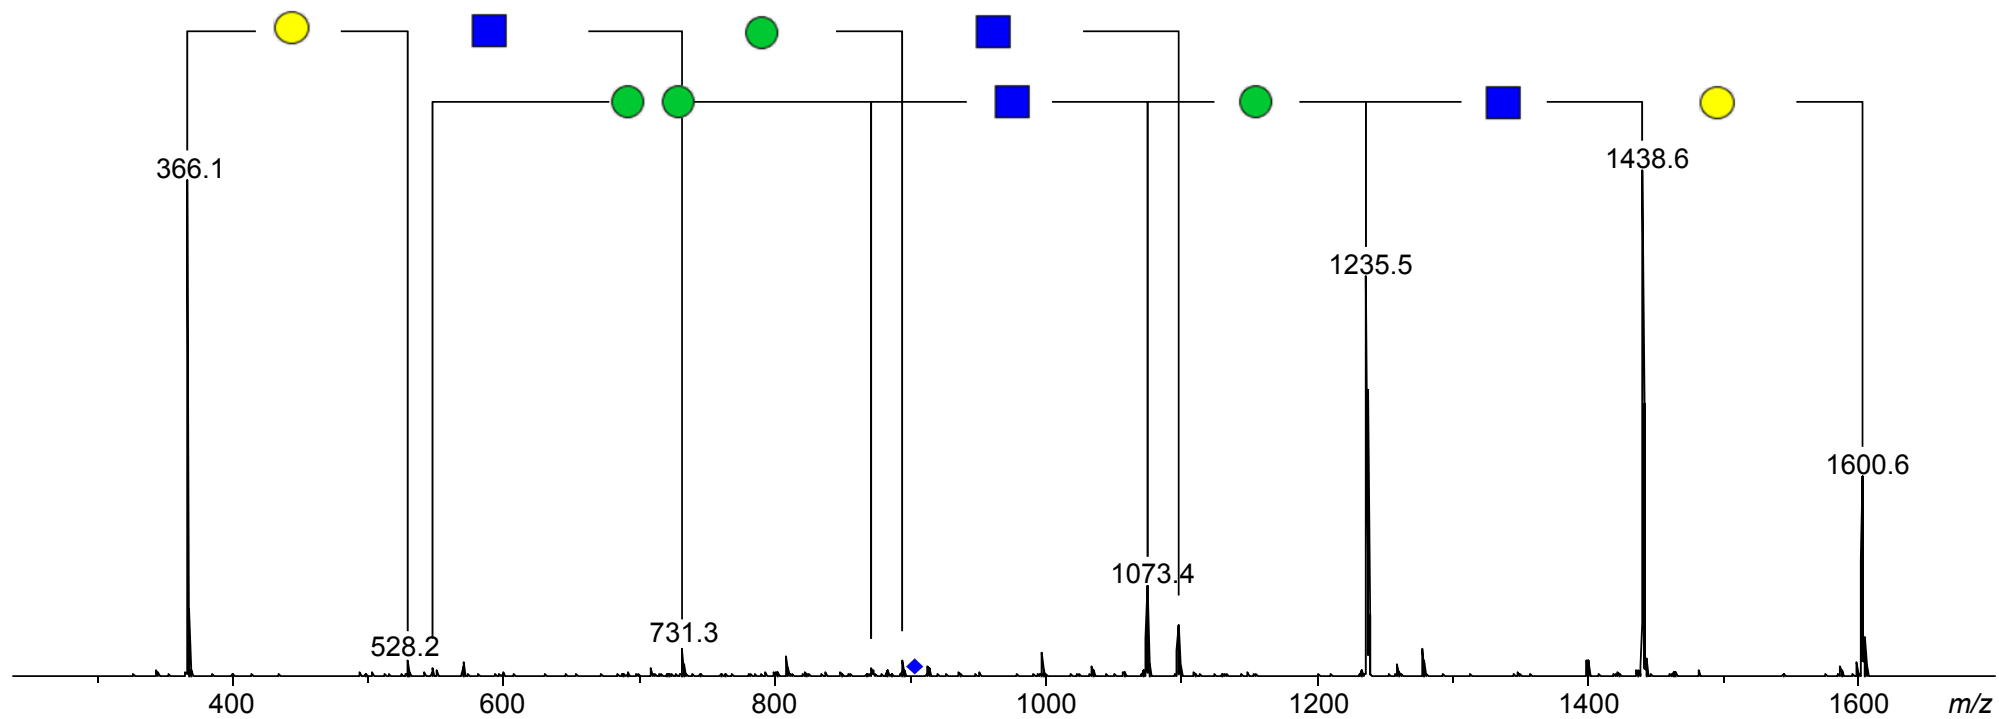

# Spectrum 57

Lift of 1824.6 [M-H]<sup>-</sup>  
S1dHex1Hex4HexNAc4-AA

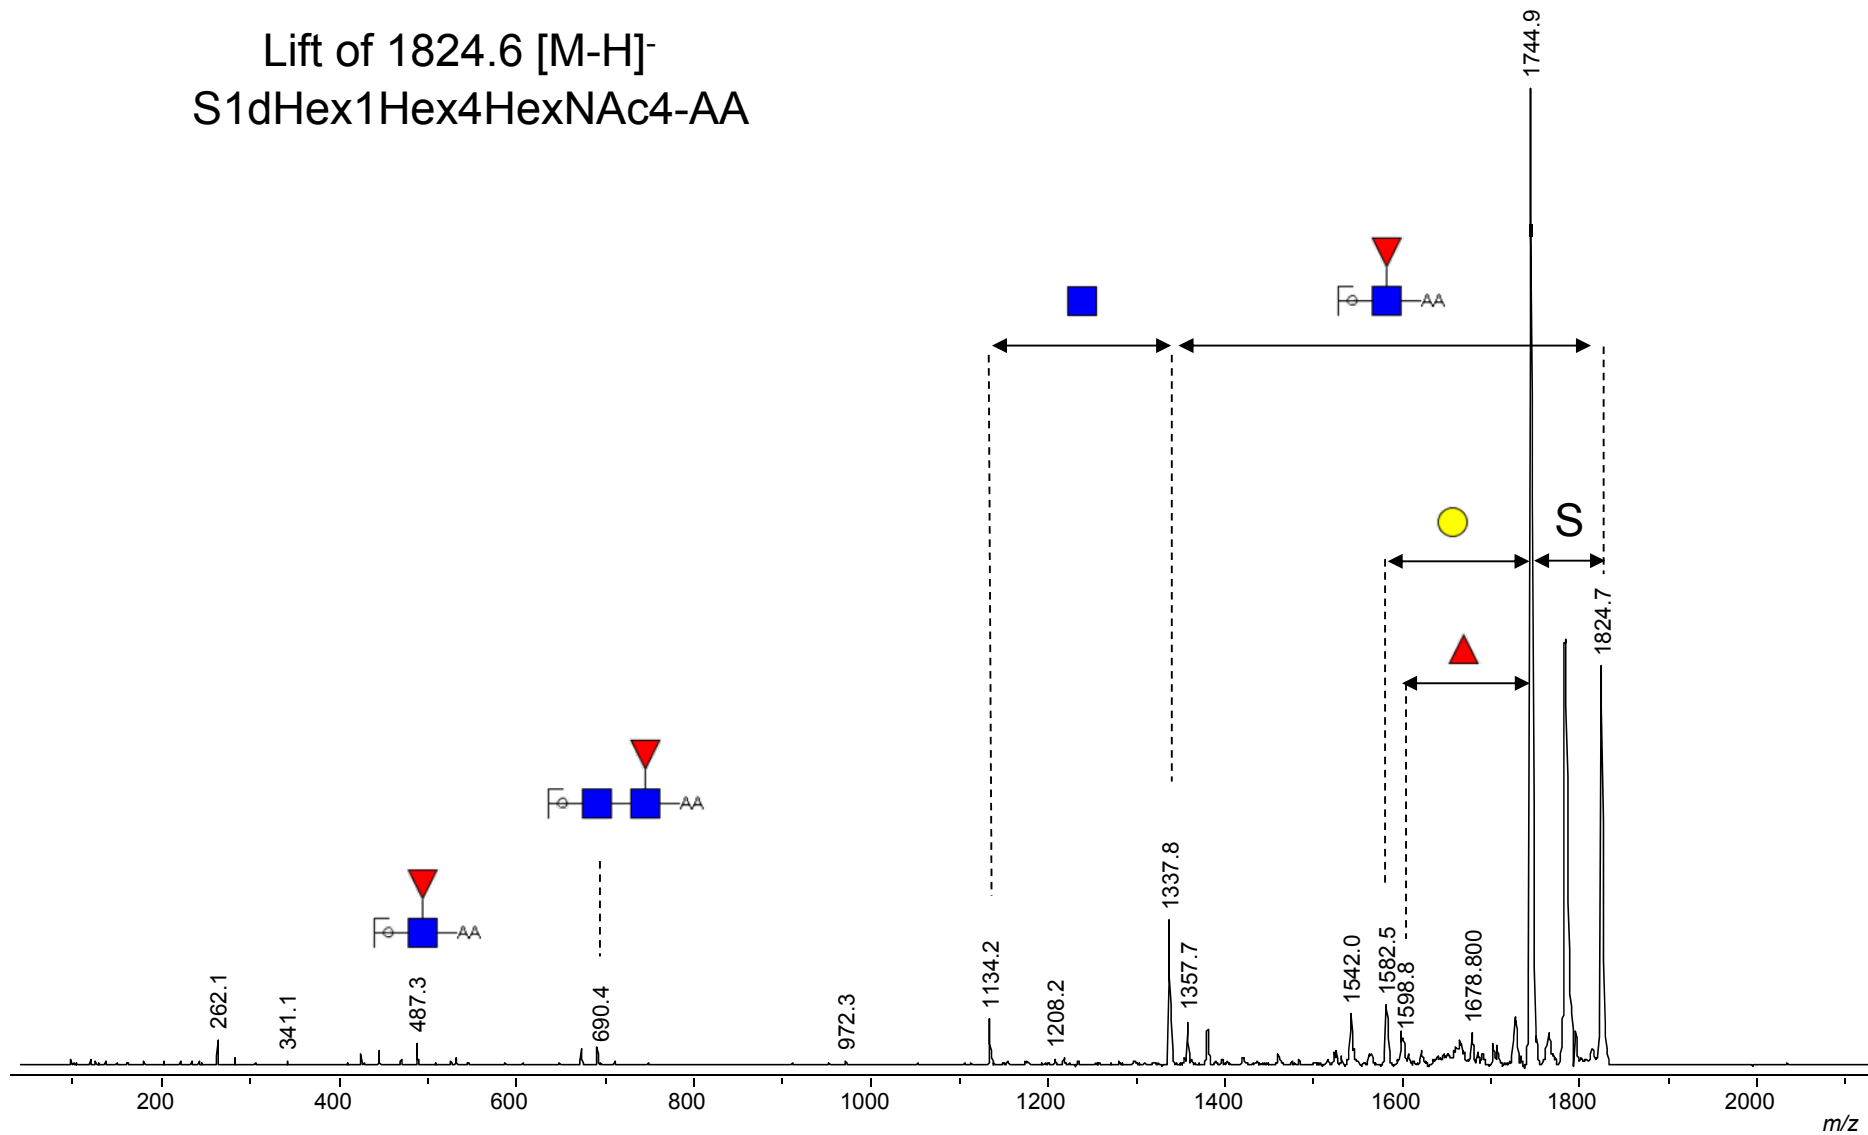

# Spectrum 58



## Glycan Search Report

Glycan: 18

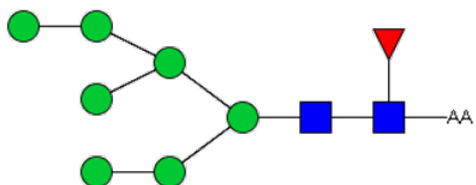

**Project path:** /N-glycans cancer/25147/comp\_25147.mgf  
**MS data:** K:/Cancer-CCR/N-glycans raw data\_MS/LC-MS of the discriminators/25147\_02.d/comp\_25147.mgf  
**Parent m/z:** 913.8321 2+ **Score:** 36.347  
**Composition:** Hex7HexNAc2dHex1-AA **Intensity coverage [%]:** 0.74  
**Accession:** 29019 **Fragment coverage [%]:** 0.18

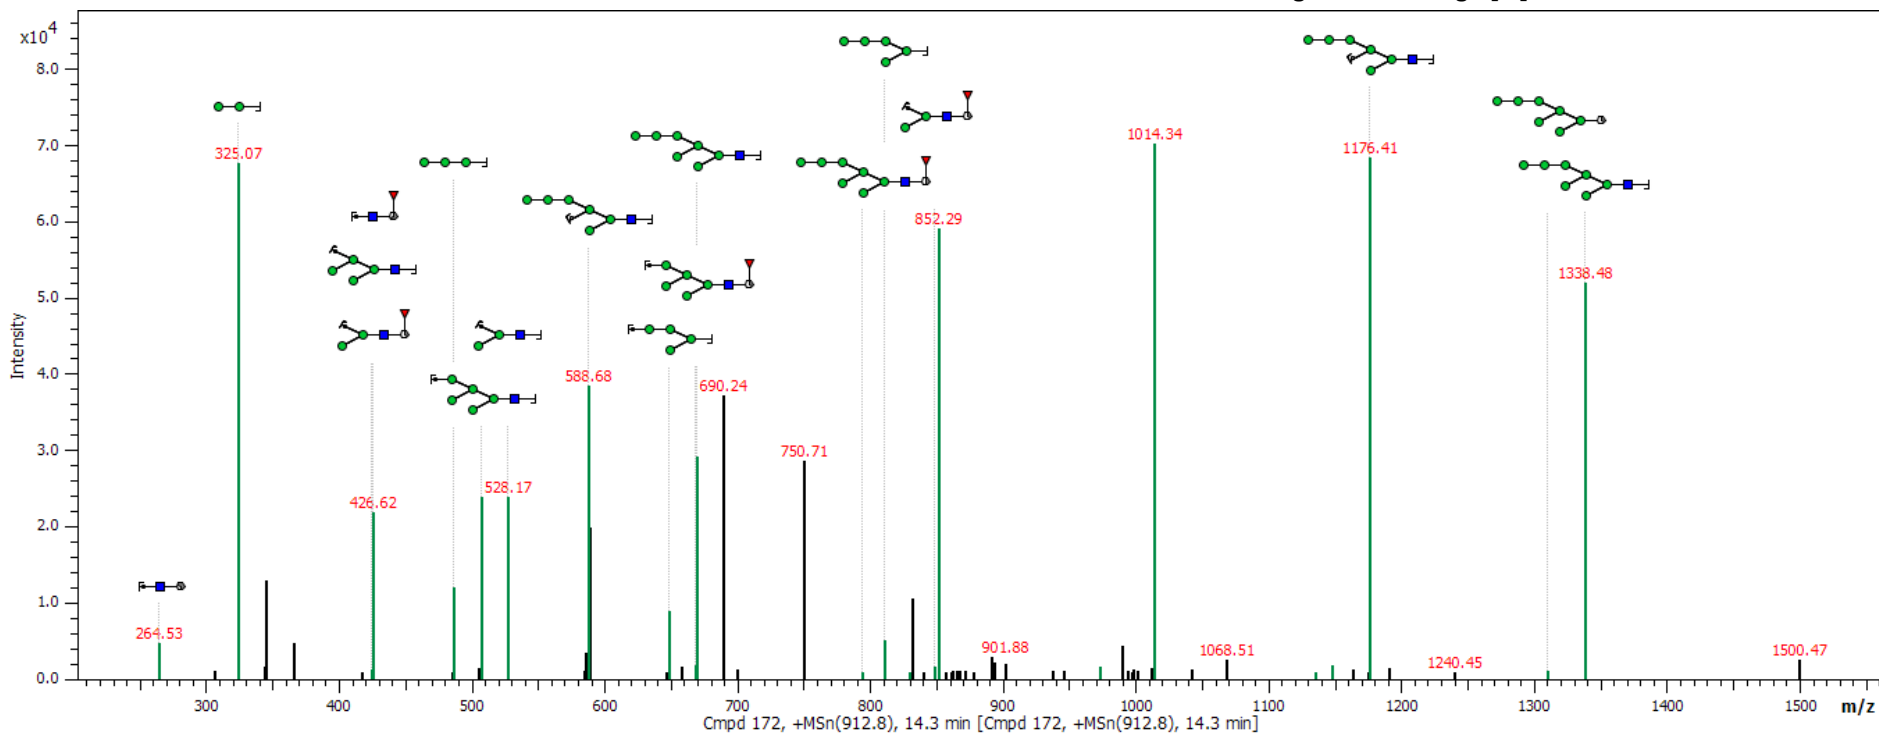



# Spectrum 59

## Glycan Search Report

Glycan: 2

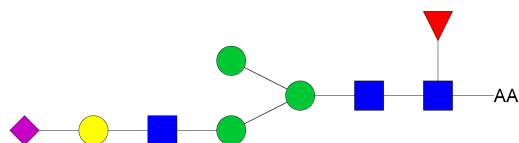

**Project path:** /N-glycans cancer/Lift spectra/CombinedLIFT  
**MS data:** c:/documents and settings/ciabalog/desktop/new folder/lift of 1832.6\_fraction58/0\_b23/1/1832.6000.lift/ 1sref/pdata/1/1r  
**Parent m/z:** 1832.6587 -1 **Score:** 67.269  
**Composition:** Hex4HexNAc3NeuAc1dHex1-AA **Intensity coverage [%]:** 0.81  
**Accession:** 36111 **Fragment coverage [%]:** 0.56

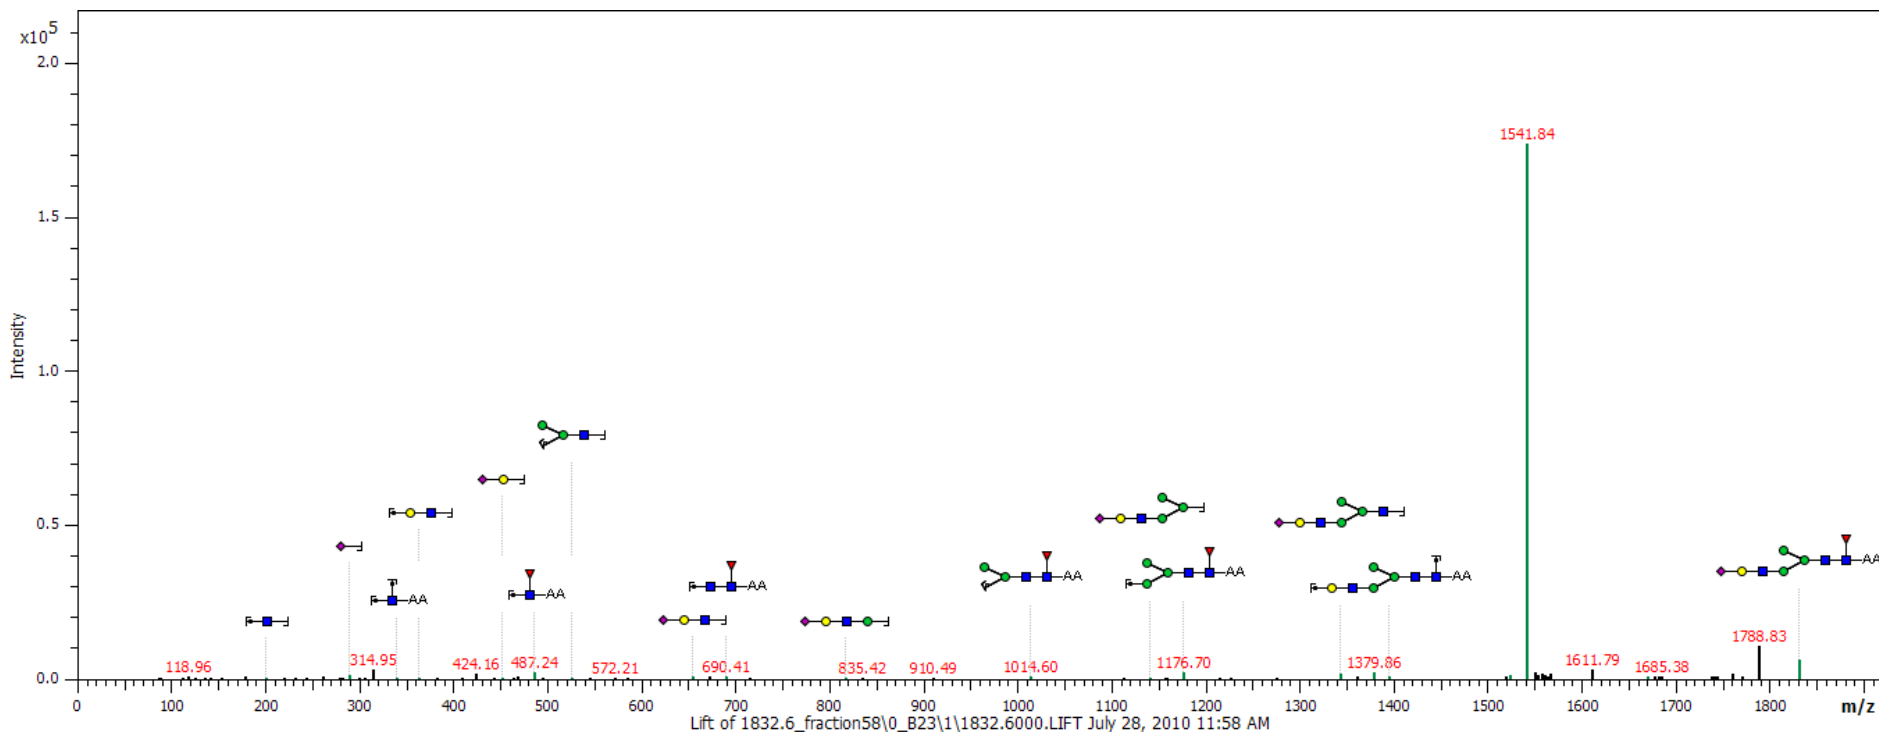



# Spectrum 60

# Glycan Search Report

Glycan: 4



**Project path:** /N-glycans cancer/25145/comp\_25145.mgf  
**MS data:** K:/Cancer-CCR/N-glycans raw data\_MS/LC-MS of the discriminators/25145\_02.d/comp\_25145.mgf  
**Parent m/z:** 917.8403 2+ **Score:** 81.672  
**Composition:** Hex4HexNAc3NeuAc1dHex1-AA **Intensity coverage [%]:** 0.91  
**Accession:** 36111 **Fragment coverage [%]:** 0.73

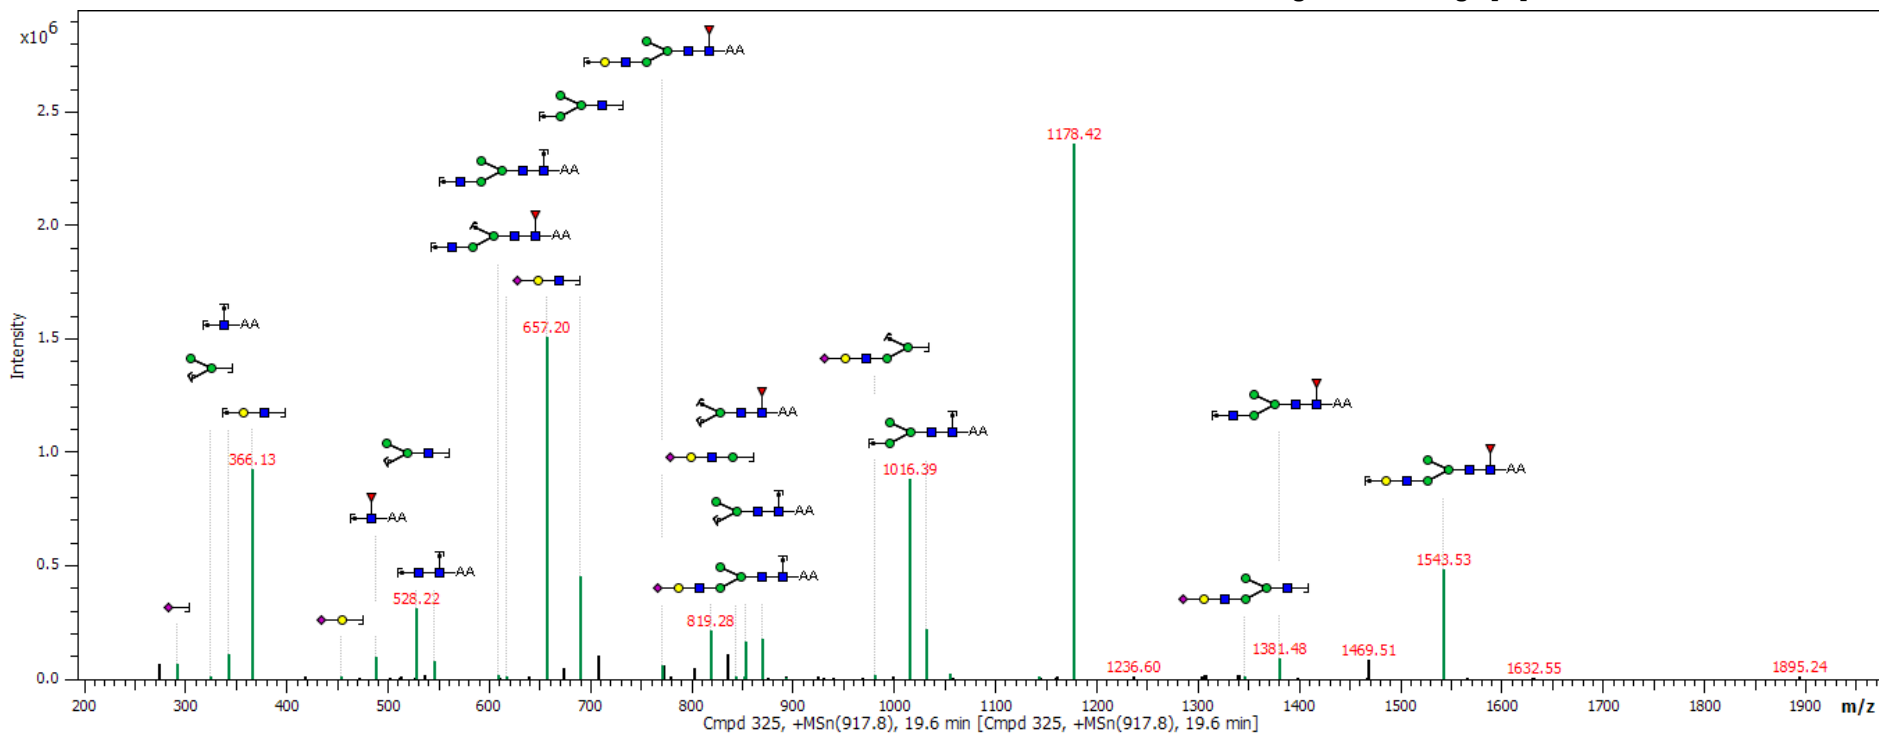



# Spectrum 61

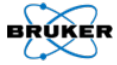

## Glycan Search Report

Glycan: 1

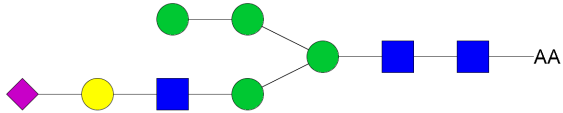

**Project path:** /N-glycans cancer/25143/comp\_25143\_01.mgf

**MS data:** K:/Cancer-CCR/N-glycans raw data\_MS/LC-MS of the discriminators/25143\_01.d/comp\_25143\_01.mgf

**Parent m/z:** 925.8377 2+

**Score:** 91.782

**Composition:** Hex5HexNAc3NeuAc1-AA

**Intensity coverage [%]:** 0.95

**Accession:** 36337

**Fragment coverage [%]:** 0.89

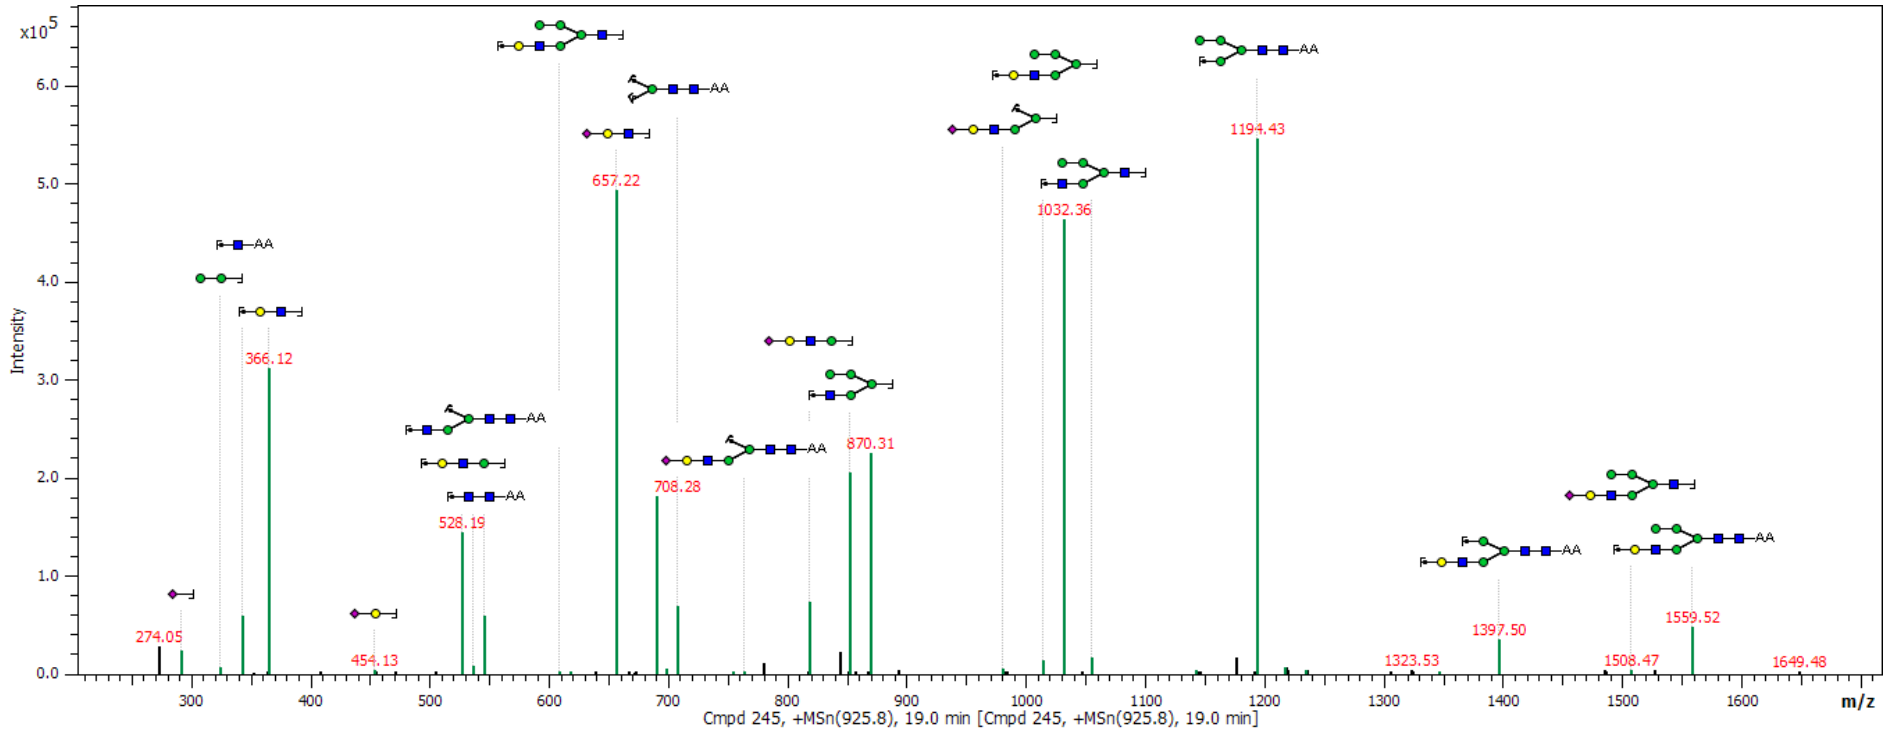

# Spectrum 62



## Glycan Search Report

Glycan: 8

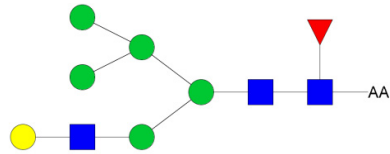

**Project path:** /N-glycans cancer/25147/comp\_25147.mgf

**MS data:** K:/Cancer-CCR/N-glycans raw data\_MS/LC-MS of the discriminators/25147\_02.d/comp\_25147.mgf

**Parent m/z:** 934.3454 2+

**Score:** 49.528

**Composition:** Hex6HexNAc3dHex1-AA

**Intensity coverage [%]:** 0.66

**Accession:** 36119

**Fragment coverage [%]:** 0.37

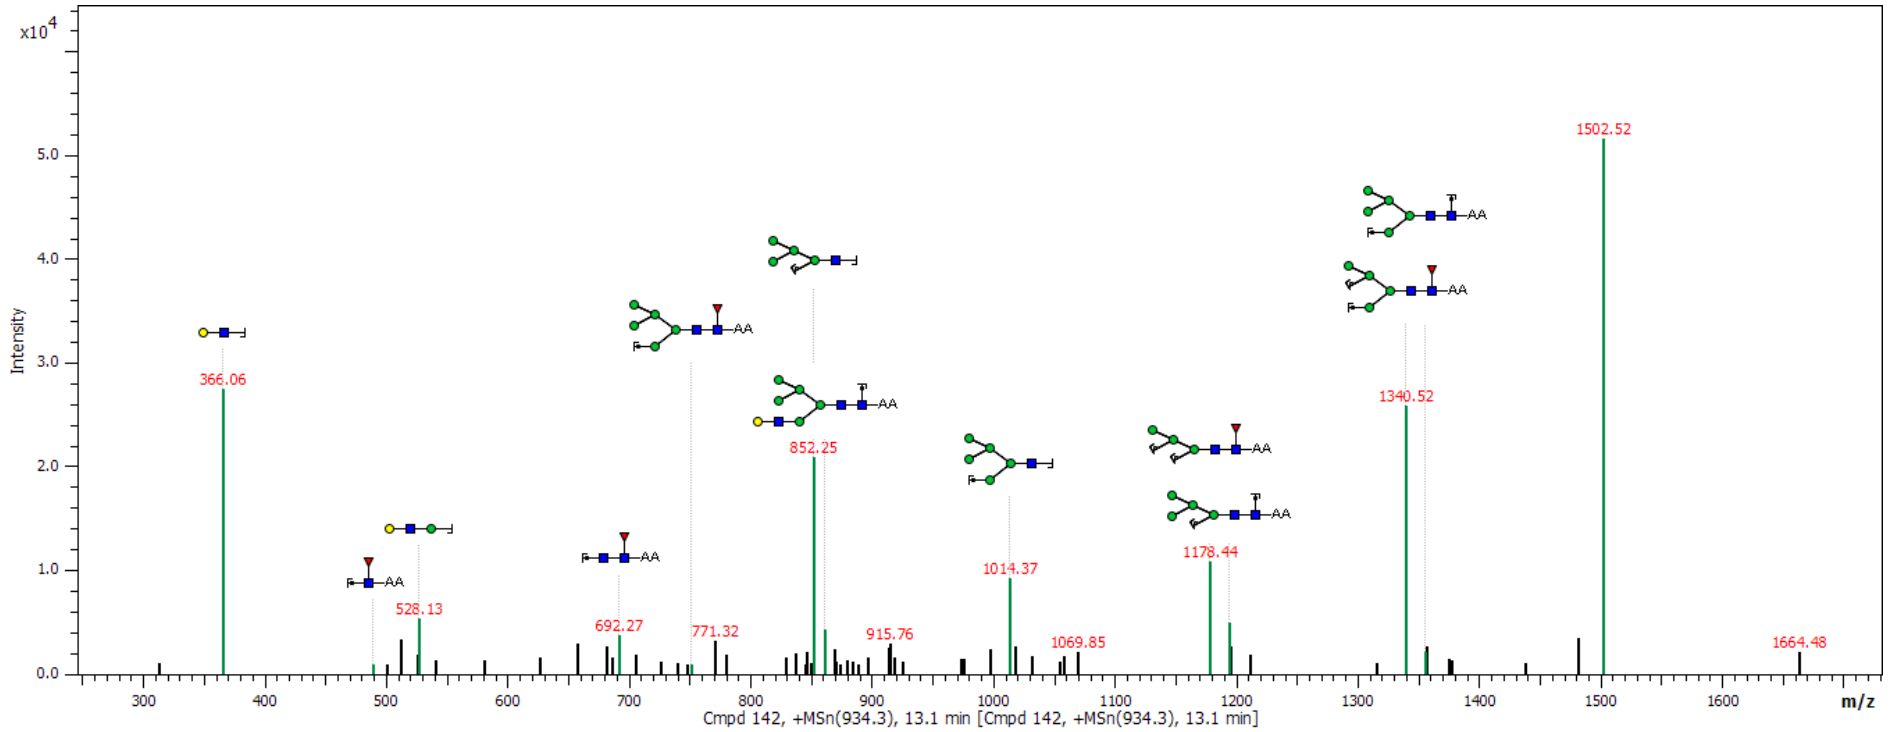

# Spectrum 63



## Glycan Search Report

Glycan: 1

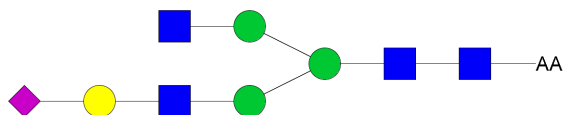

**Project path:** /N-glycans cancer/25145/comp\_25145.mgf  
**MS data:** K:/Cancer-CCR/N-glycans raw data\_MS/LC-MS of the discriminators/25145\_02.d/comp\_25145.mgf  
**Parent m/z:** 946.3510 2+ **Score:** 90.886  
**Composition:** Hex4HexNAc4NeuAc1-AA **Intensity coverage [%]:** 0.93  
**Accession:** 36345 **Fragment coverage [%]:** 0.88

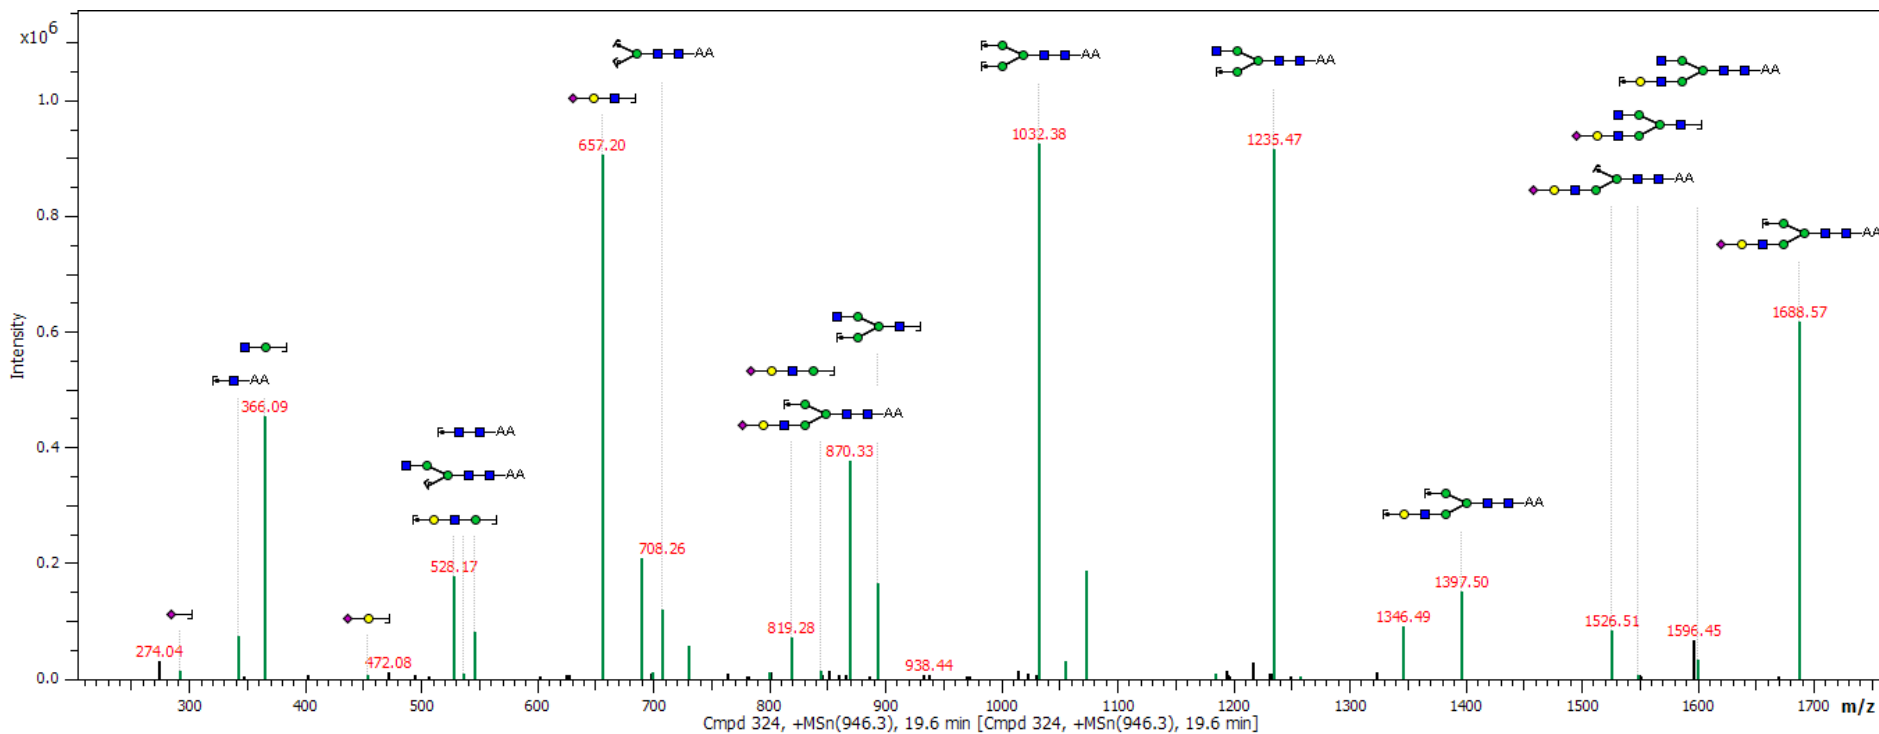

# Spectrum 64



## Glycan Search Report

Glycan: 4

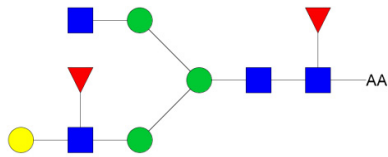

**Project path:** /N-glycans cancer/25143/comp\_25143\_01.mgf

**MS data:** K:/Cancer-CCR/N-glycans raw data\_MS/LC-MS of the discriminators/25143\_01.d/comp\_25143\_01.mgf

**Parent m/z:** 946.8612 2+

**Score:** 78.128

**Composition:** Hex4HexNAc4dHex2-AA

**Intensity coverage [%]:** 0.76

**Accession:** 36232

**Fragment coverage [%]:** 0.81

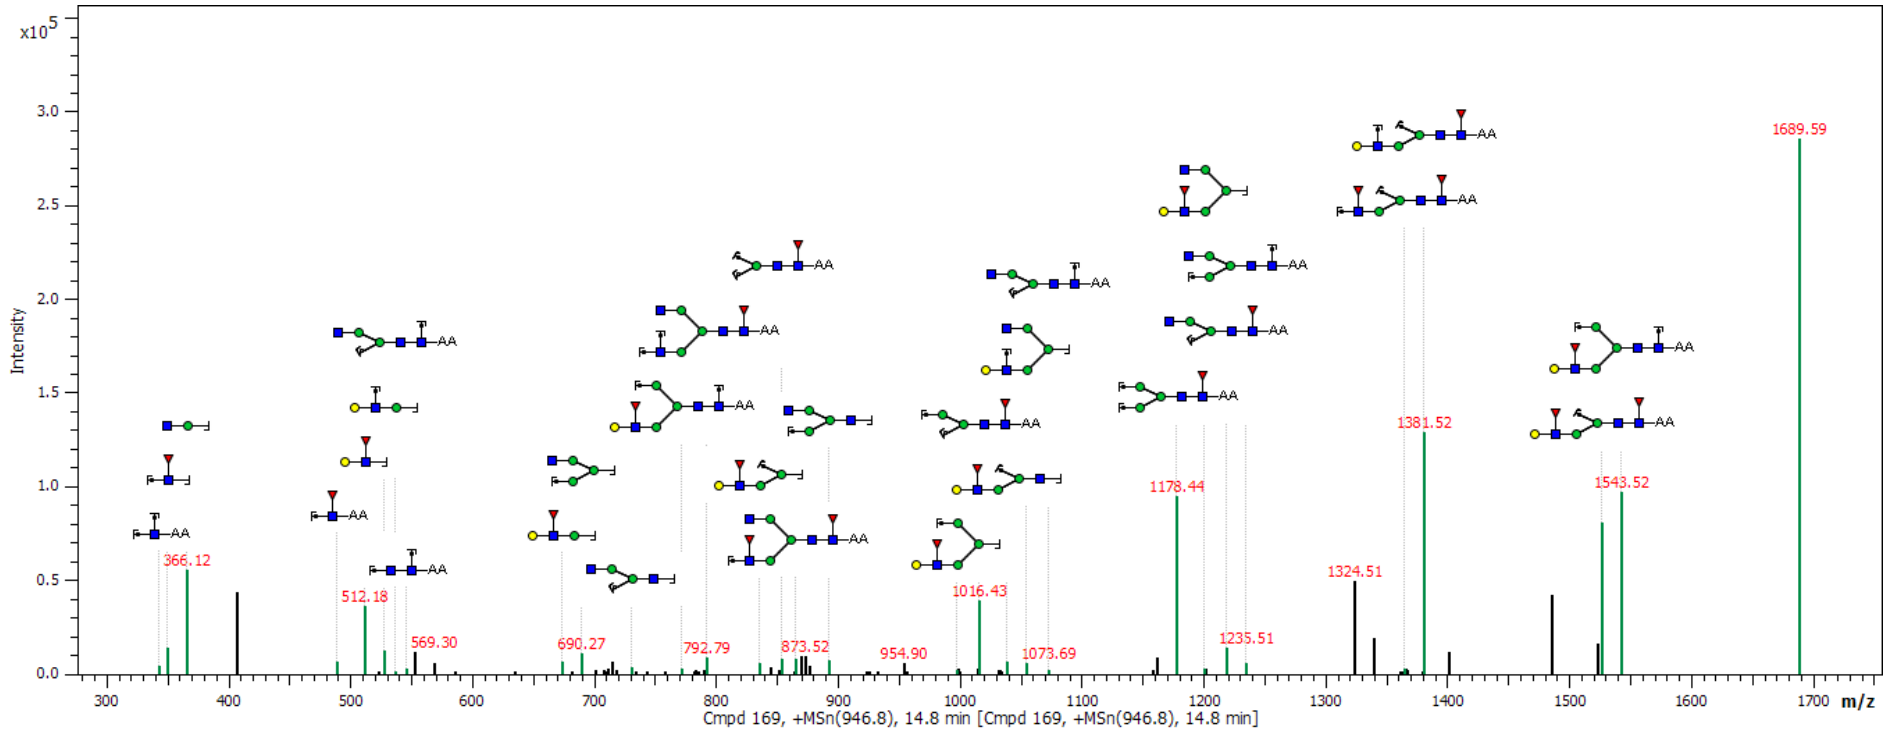

# Spectrum 65



## Glycan Search Report

Glycan: 8

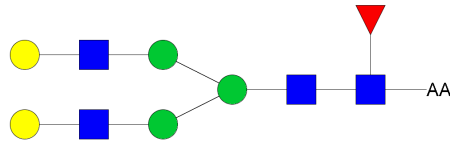

**Project path:** /N-glycans cancer/Lift spectra/CombinedLIFT  
**MS data:** c:/documents and settings/ciabalog/desktop/new folder/lift of 1906.7\_fraction59/0\_b24/1/1906.7000.lift/ 1sref/pdata/1/1r  
**Parent m/z:** 1906.6955 -1      **Score:** 48.617  
**Composition:** Hex5HexNAc4dHex1-AA      **Intensity coverage [%]:** 0.38  
**Accession:** 36269      **Fragment coverage [%]:** 0.63

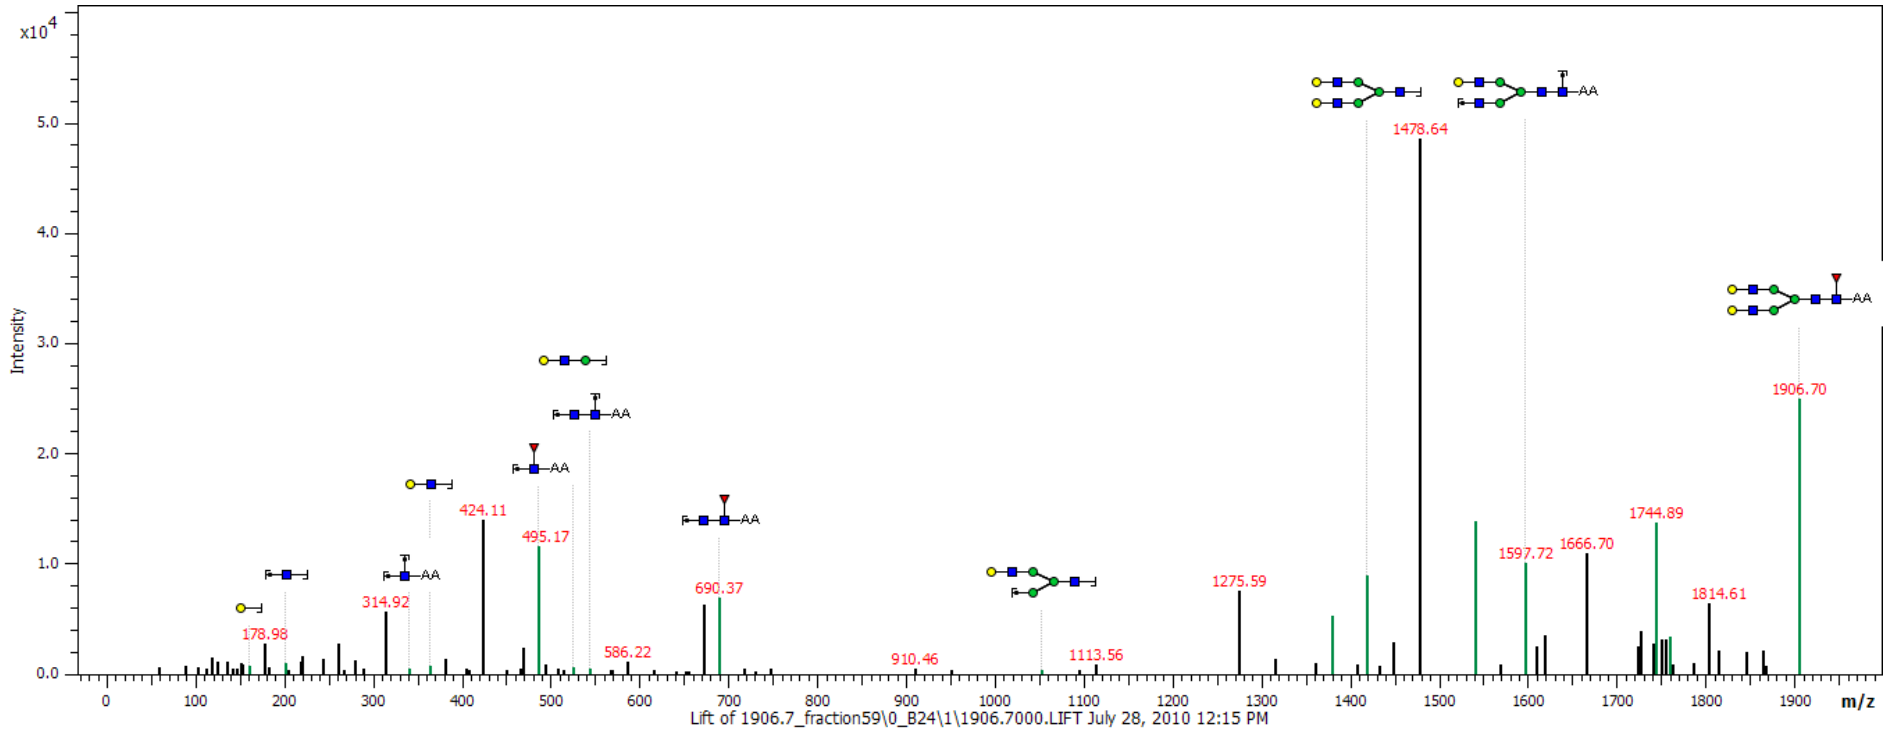

# Spectrum 66



## Glycan Search Report

Glycan: 2

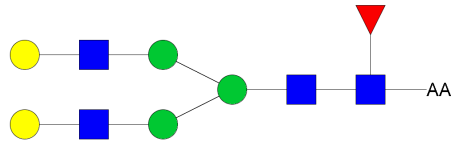

Project path: /N-glycans cancer/25143/comp\_25143\_01.mgf

MS data: K:/Cancer-CCR/N-glycans raw data\_MS/LC-MS of the discriminators/25143\_01.d/comp\_25143\_01.mgf

Parent m/z: 954.8587 2+

Score: 86.071

Composition: Hex5HexNAc4dHex1-AA

Intensity coverage [%]: 0.96

Accession: 36269

Fragment coverage [%]: 0.77

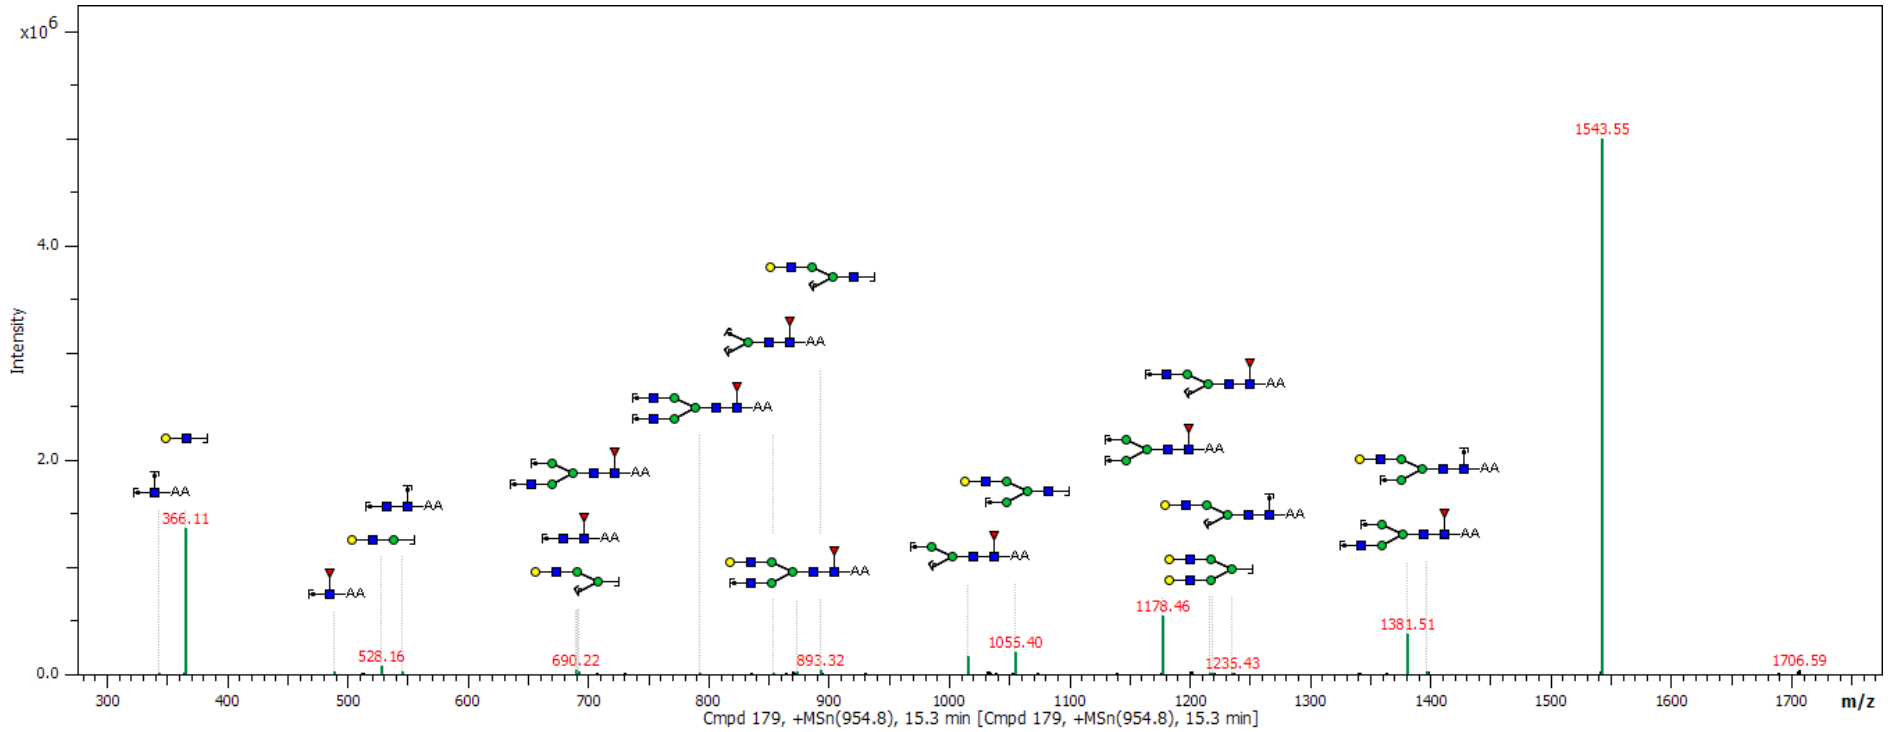

# Spectrum 67



## Glycan Search Report

Glycan: 13

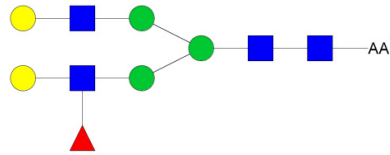

**Project path:** /N-glycans cancer/25147/comp\_25147.mgf

**MS data:** K:/Cancer-CCR/N-glycans raw data\_MS/LC-MS of the discriminators/25147\_02.d/comp\_25147.mgf

**Parent m/z:** 954.8587 2+

**Score:** 41.604

**Composition:** Hex5HexNAc4dHex1-AA

**Intensity coverage [%]:** 0.73

**Accession:** 10190

**Fragment coverage [%]:** 0.24

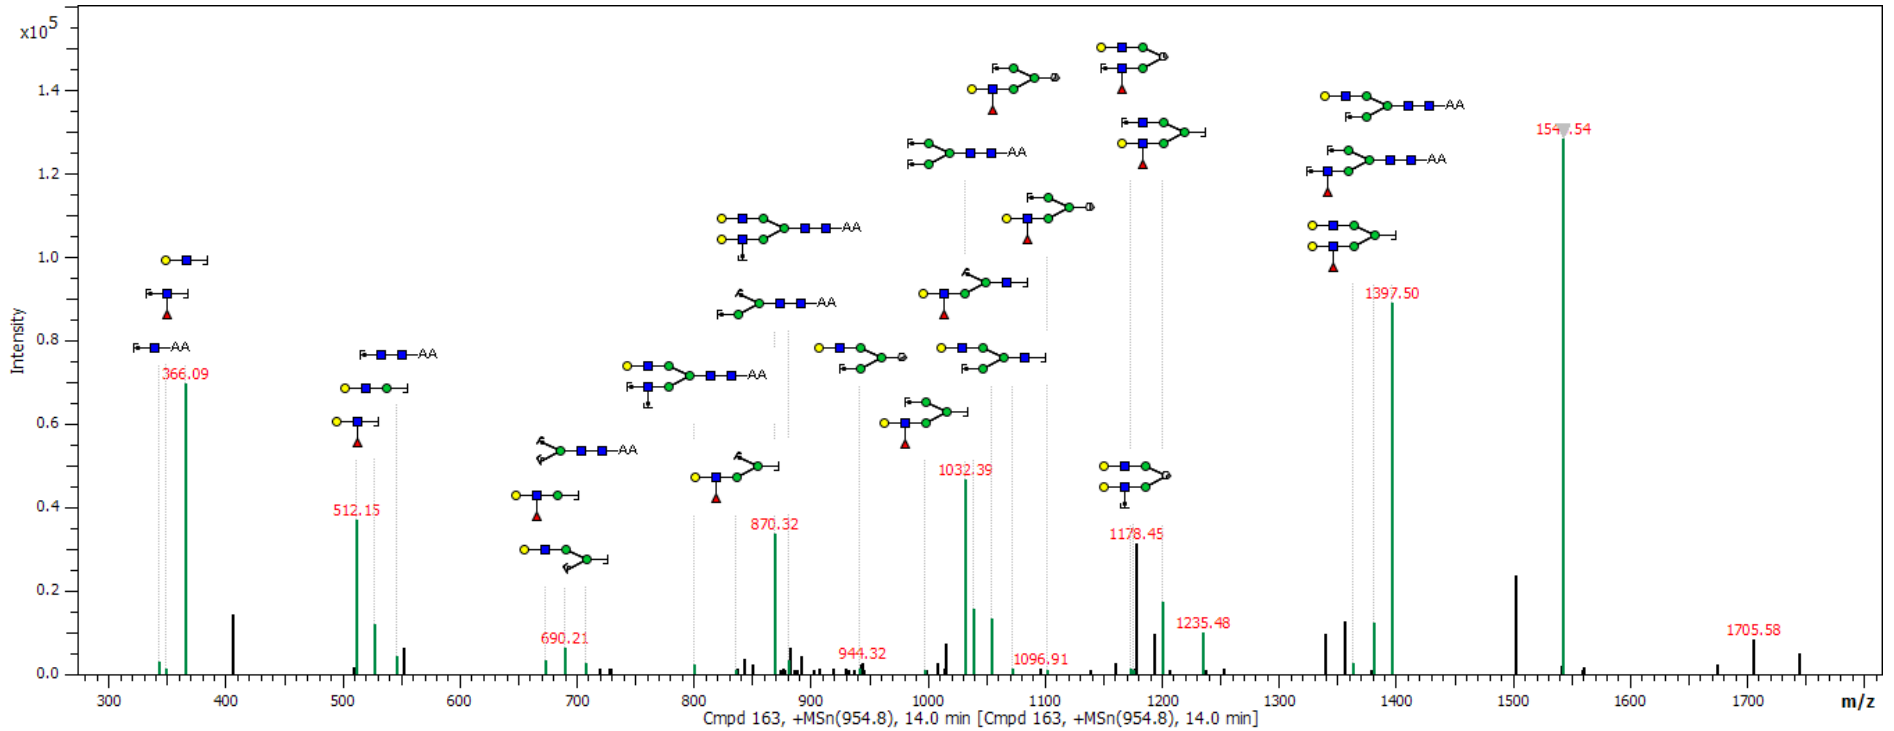

# Spectrum 68



## Glycan Search Report

Glycan: 18

Project path: /N-glycans cancer/25143/comp\_25143\_01.mgf

MS data: K:/Cancer-CCR/N-glycans raw data\_MS/LC-MS of the discriminators/25143\_01.d/comp\_25143\_01.mgf

Parent m/z: 962.8561 2+

Score: 34.897

Composition: Hex6HexNAc4-AA

Intensity coverage [%]: 0.28

Accession: 36353

Fragment coverage [%]: 0.44

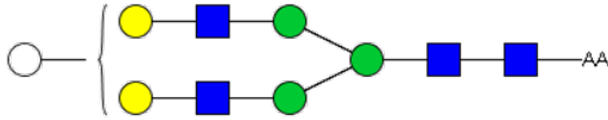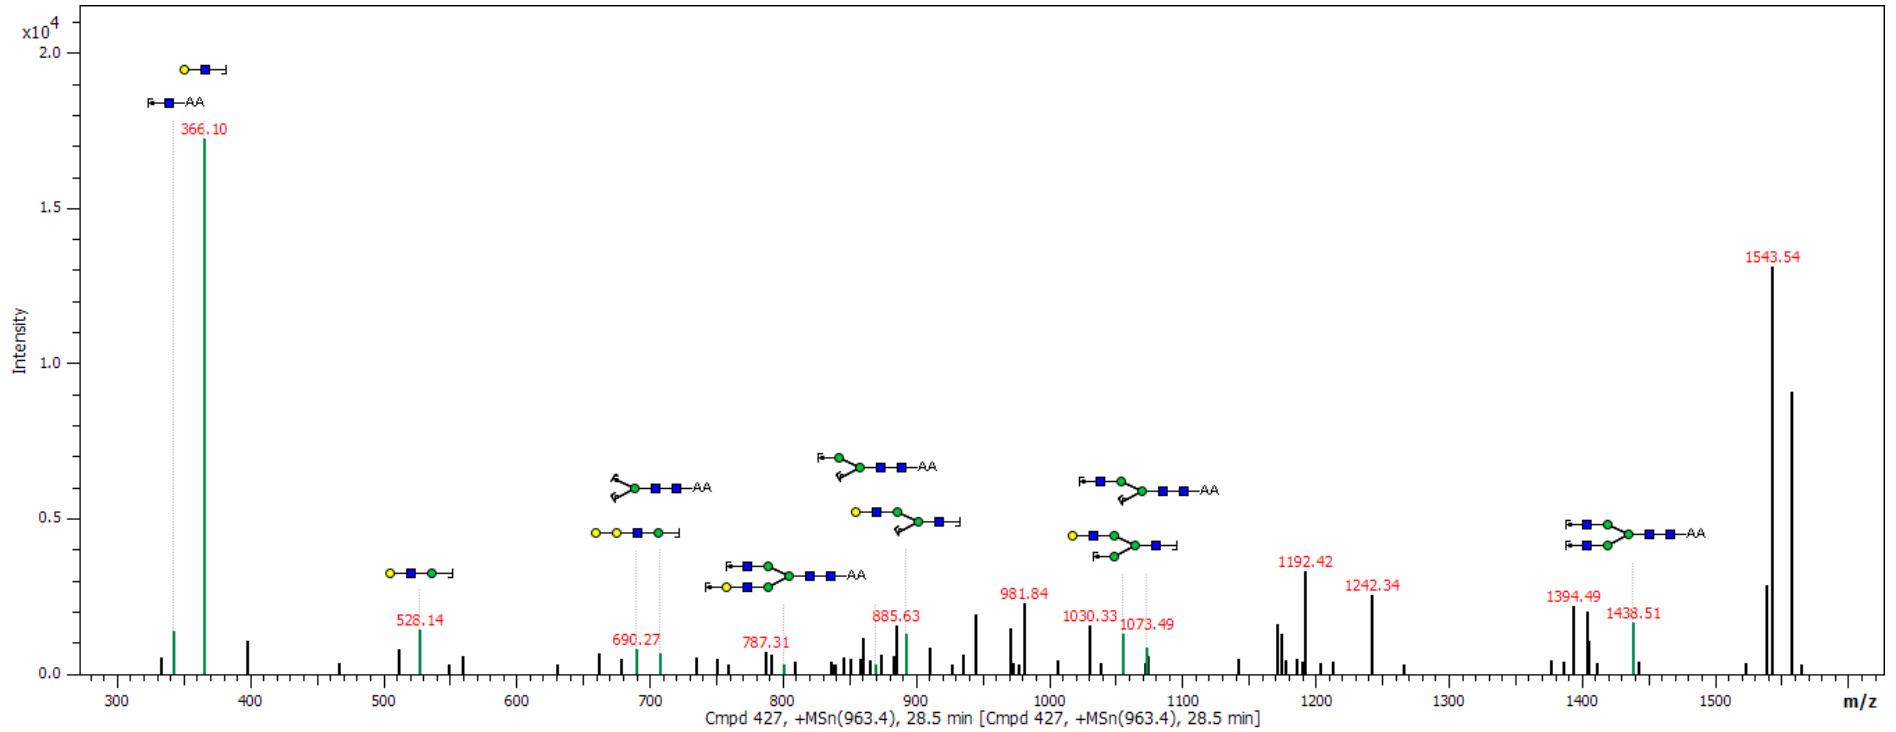



# Spectrum 69



## Glycan Search Report

Glycan: 8

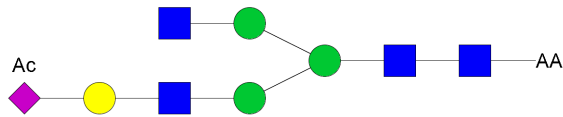

Project path: /N-glycans cancer/25142/comp\_25142\_01.mgf

MS data: K:/Cancer-CCR/N-glycans raw data\_MS/LC-MS of the discriminators/25142\_01.d/comp\_25142\_01.mgf

Parent m/z: 967.3563 2+

Score: 34.490

Composition: Ac1Hex4HexNAc4NeuAc1-AA

Intensity coverage [%]: 0.56

Accession: 7875

Fragment coverage [%]: 0.21

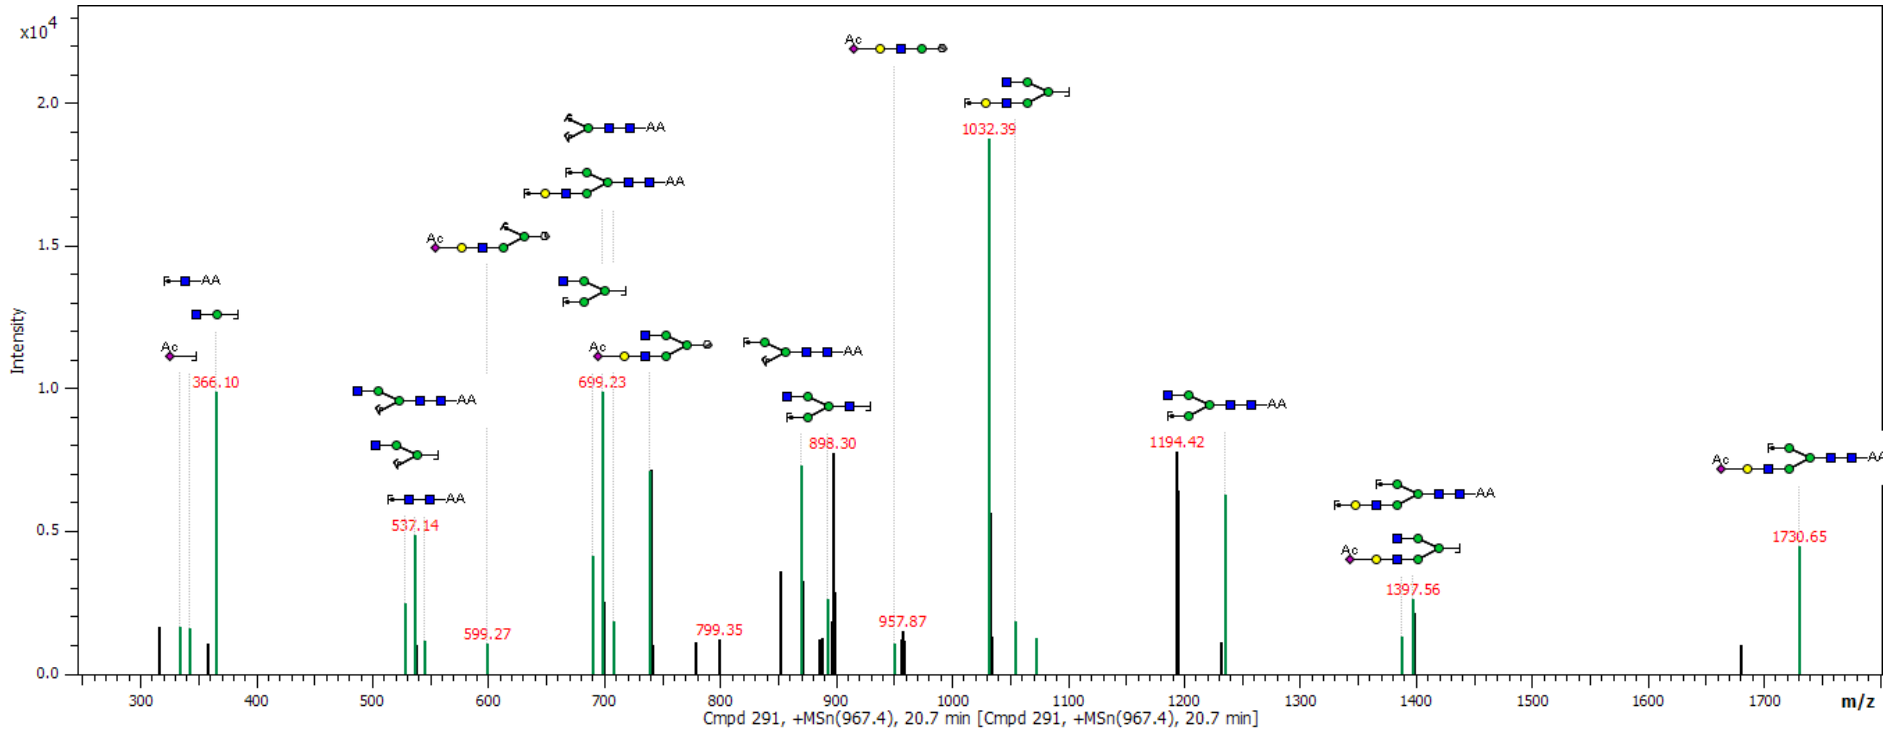

# Spectrum 70



## Glycan Search Report

Glycan: 12

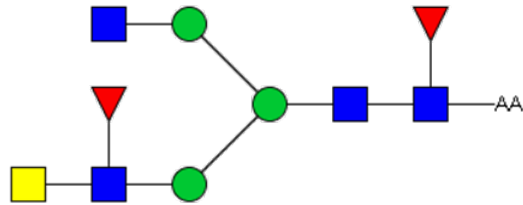

**Project path:** /N-glycans cancer/25145/comp\_25145.mgf

**MS data:** K:/Cancer-CCR/N-glycans raw data\_MS/LC-MS of the discriminators/25145\_02.d/comp\_25145.mgf

**Parent m/z:** 967.3745 2+

**Score:** 58.743

**Composition:** Hex3HexNAc5dHex2-AA

**Intensity coverage [%]:** 0.64

**Accession:** 36714

**Fragment coverage [%]:** 0.54

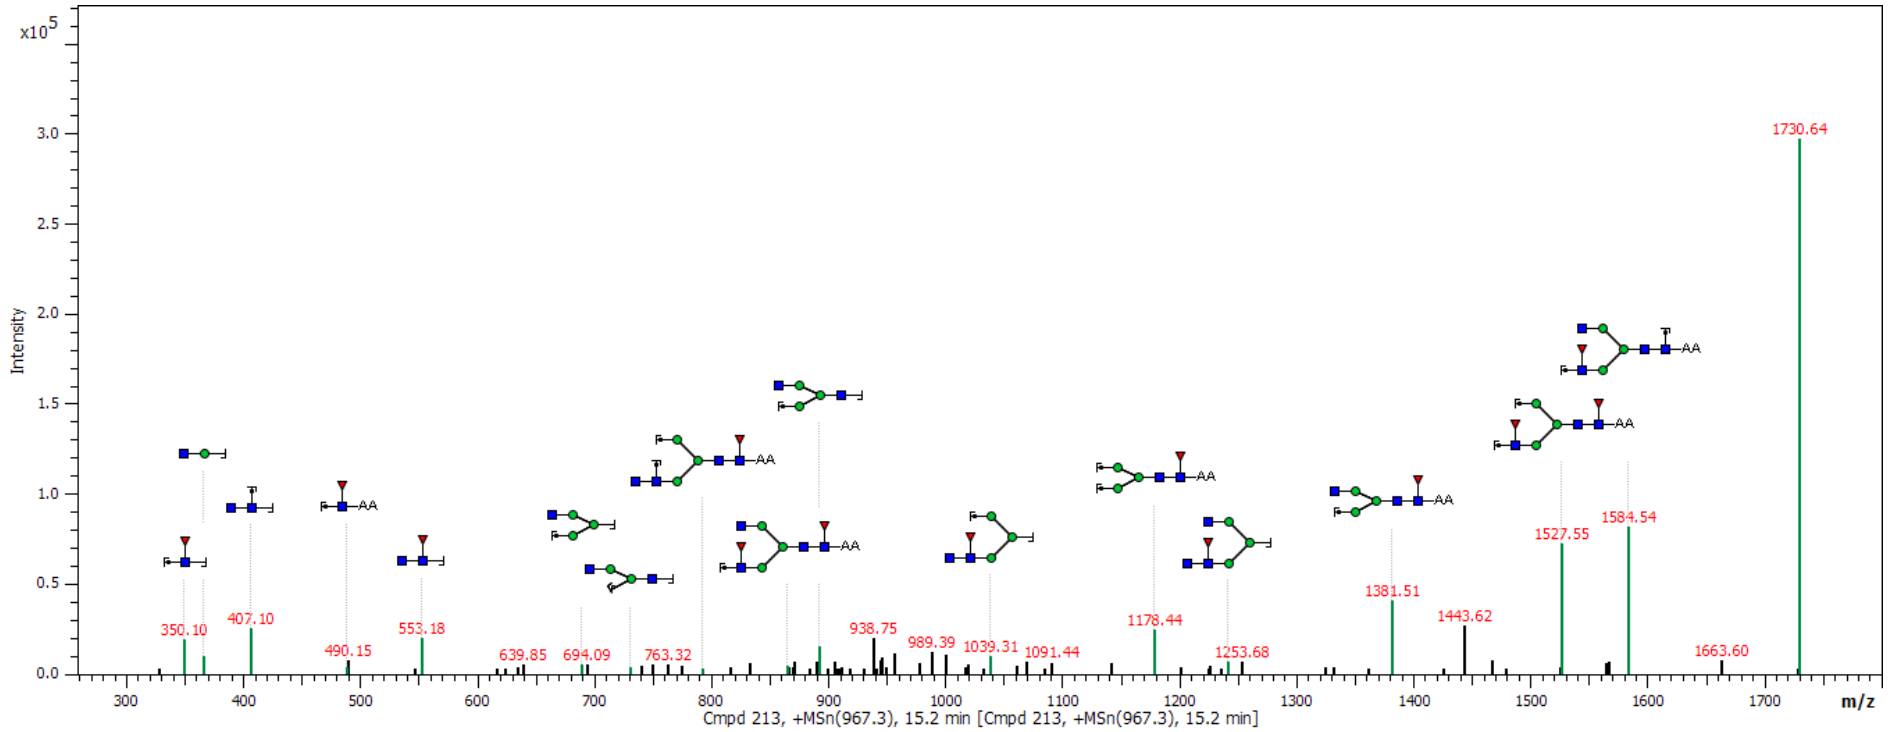

# Spectrum 71

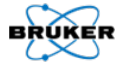

## Glycan Search Report

Glycan: 10

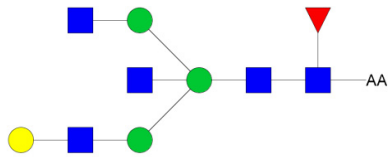

**Project path:** /N-glycans cancer/Lift spectra/CombinedLIFT  
**MS data:** c:/documents and settings/ciabalog/desktop/new folder/lift of 1947.7\_fraction55/0\_b20/1/1947.7000.lift/1sref/pdata/1/1r  
**Parent m/z:** 1947.7221 -1 **Score:** 46.581  
**Composition:** Hex4HexNAc5dHex1-AA **Intensity coverage [%]:** 0.40  
**Accession:** 36228 **Fragment coverage [%]:** 0.54

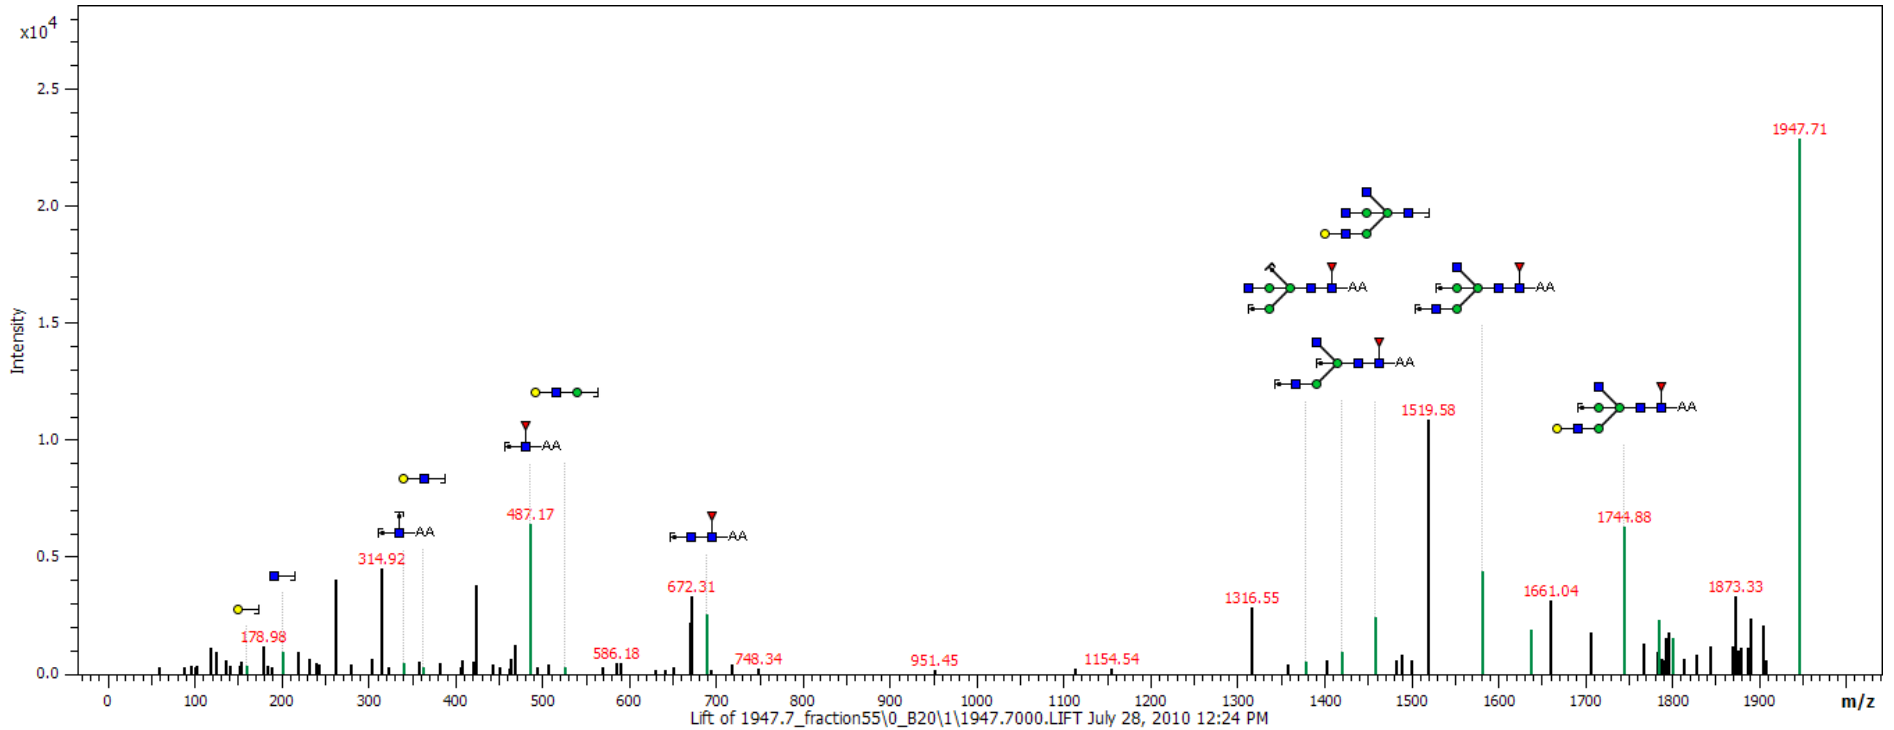

# Spectrum 72



## Glycan Search Report

Glycan: 5

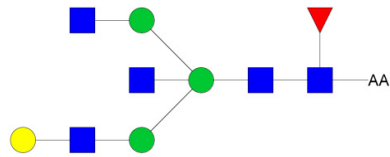

**Project path:** /N-glycans cancer/25145/comp\_25145.mgf  
**MS data:** K:/Cancer-CCR/N-glycans raw data\_MS/LC-MS of the discriminators/25145\_02.d/comp\_25145.mgf  
**Parent m/z:** 975.3720 2+ **Score:** 80.202  
**Composition:** Hex4HexNAc5dHex1-AA **Intensity coverage [%]:** 0.86  
**Accession:** 36228 **Fragment coverage [%]:** 0.75

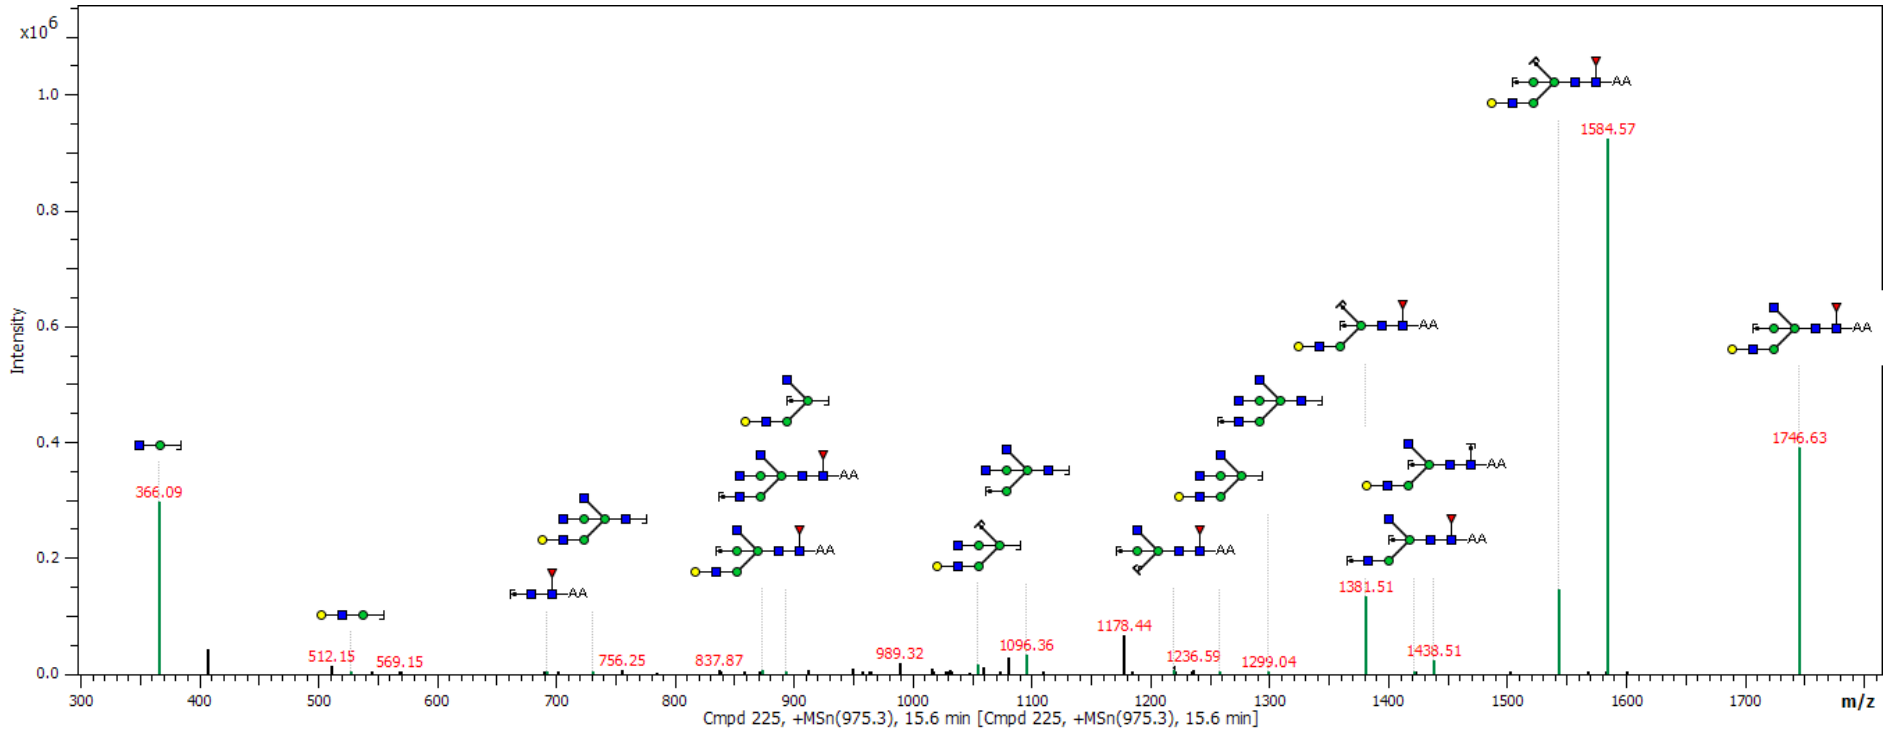

# Spectrum 73



## Glycan Search Report

Glycan: 8

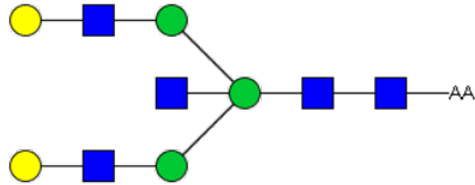

**Project path:** /N-glycans cancer/25145/comp\_25145.mgf

**MS data:** K:/Cancer-CCR/N-glycans raw data\_MS/LC-MS of the discriminators/25145\_02.d/comp\_25145.mgf

**Parent m/z:** 983.3694 2+

**Score:** 71.951

**Composition:** Hex5HexNAc5-AA

**Intensity coverage [%]:** 0.86

**Accession:** 36348

**Fragment coverage [%]:** 0.61

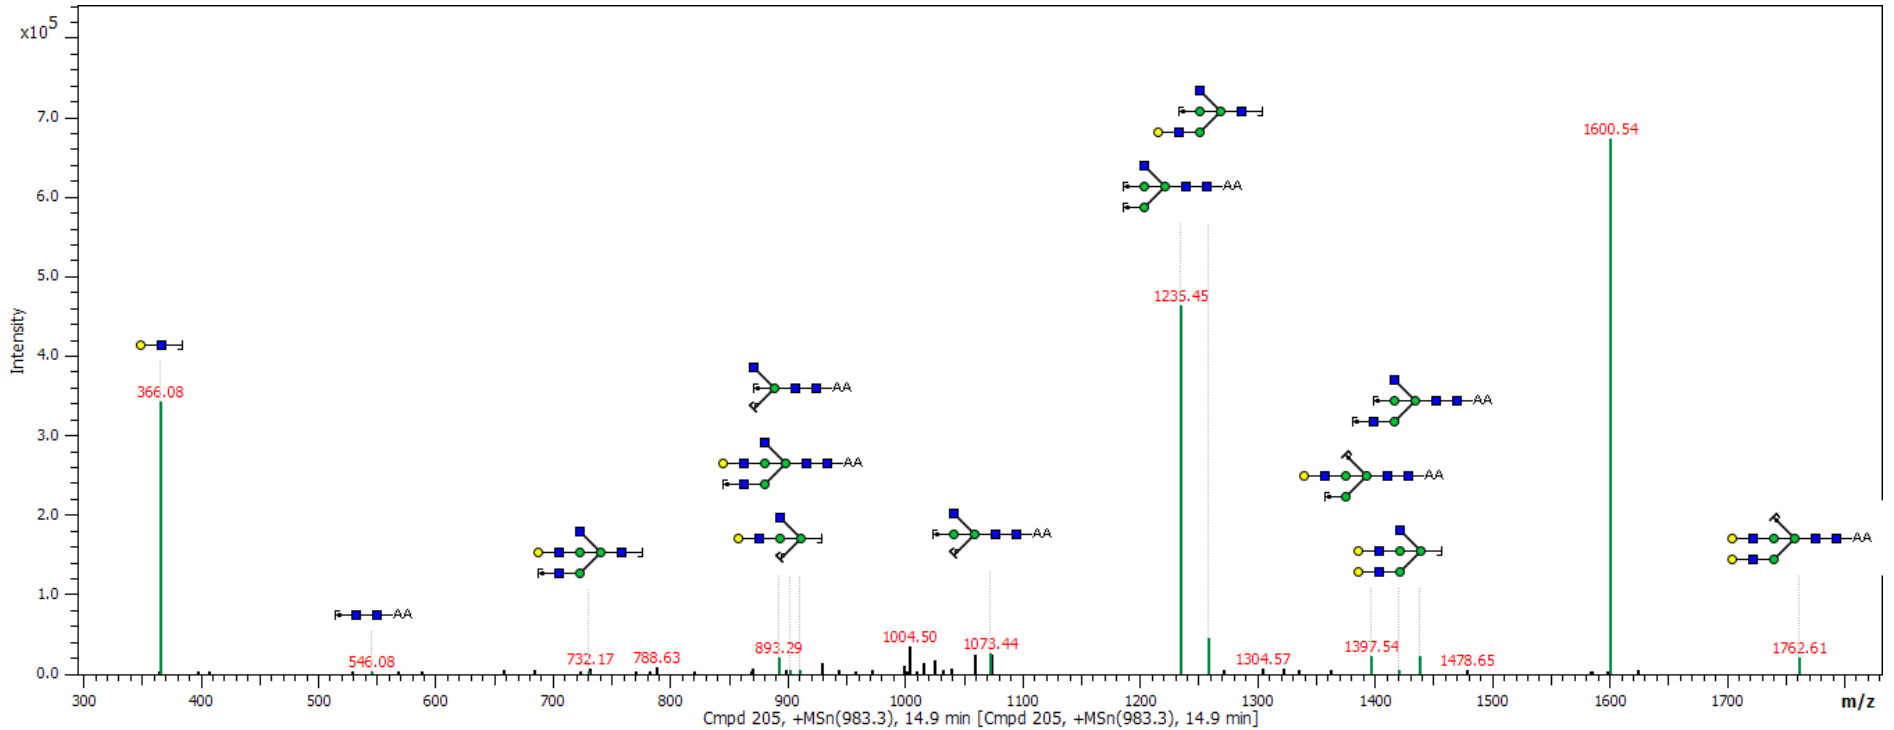

# Spectrum 74

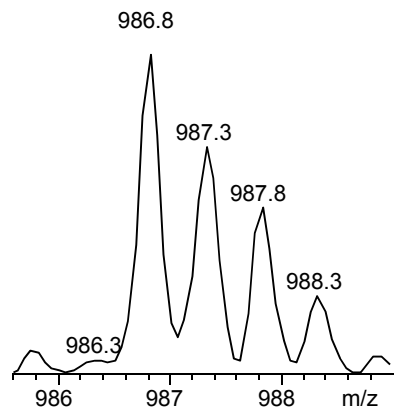

ESI MS/MS of  $[986.8+2H]^{2+}$

S1dHex2Hex4HexNAc4-AA

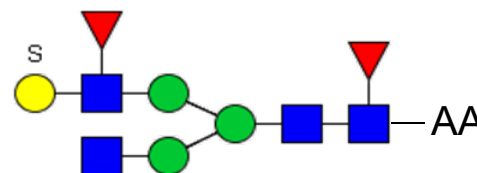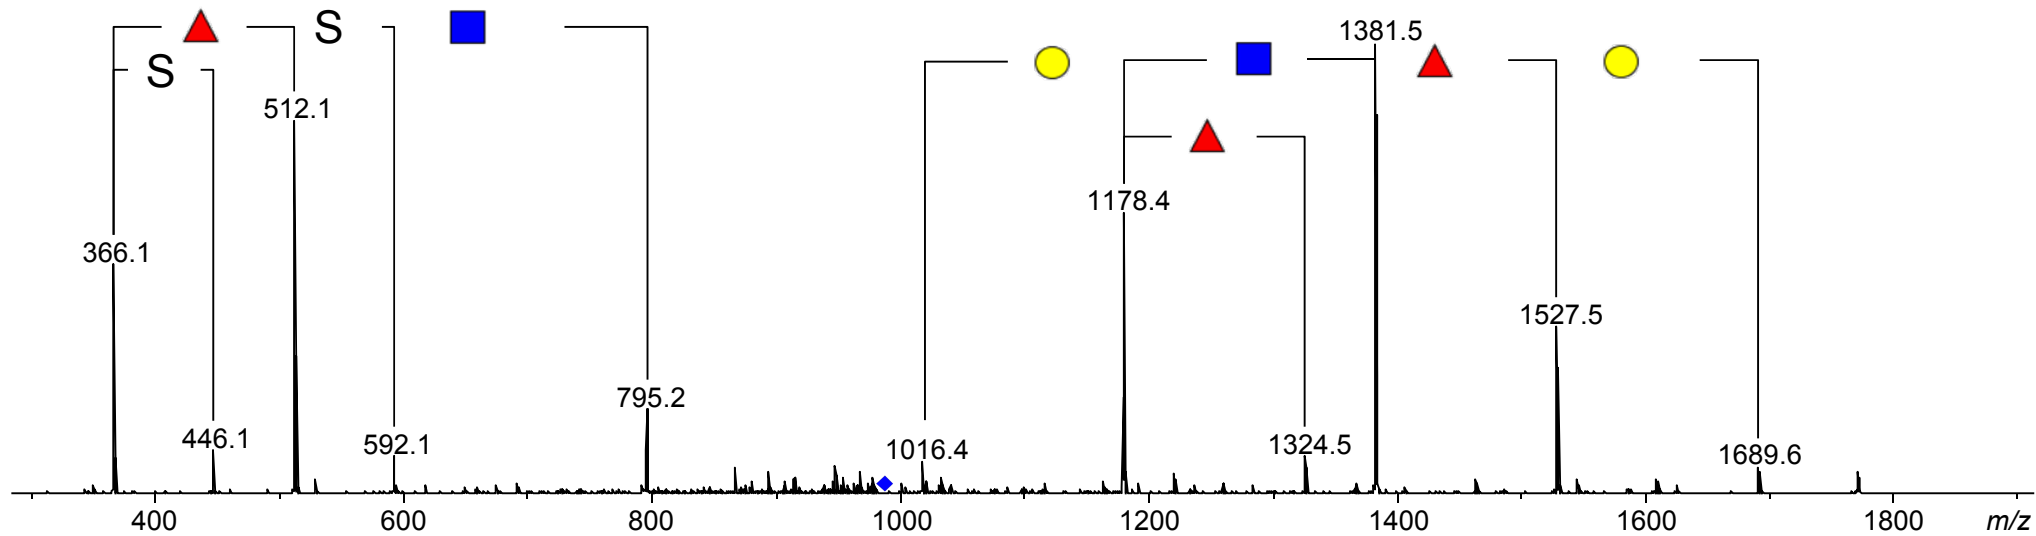

# Spectrum 75



## Glycan Search Report

Glycan: 19

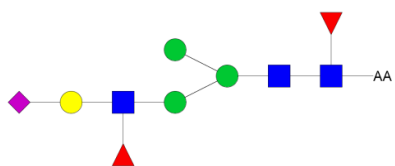

**Project path:** /N-glycans cancer/25143/comp\_25143\_01.mgf

**MS data:** K:/Cancer-CCR/N-glycans raw data\_MS/LC-MS of the discriminators/25143\_01.d/comp\_25143\_01.mgf

**Parent m/z:** 990.8692 2+

**Score:** 34.184

**Composition:** Hex4HexNAc3NeuAc1dHex2-AA

**Intensity coverage [%]:** 0.68

**Accession:** 29052

**Fragment coverage [%]:** 0.17

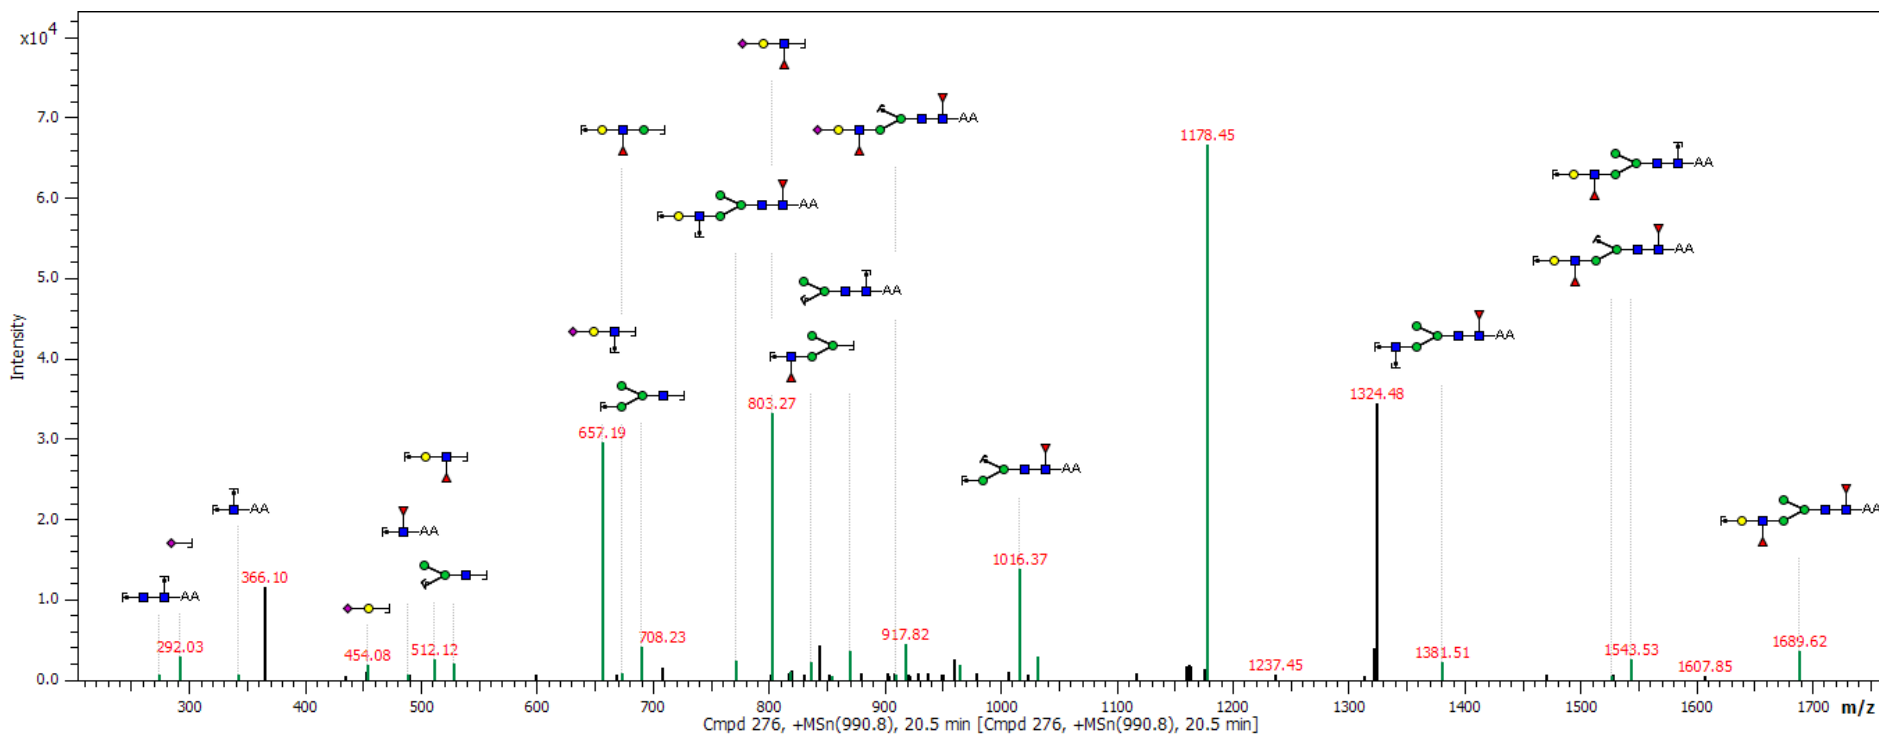

# Spectrum 76

Lift of 1986.7 [M-H]<sup>-</sup>  
S1dHex1Hex5HexNAc4-AA

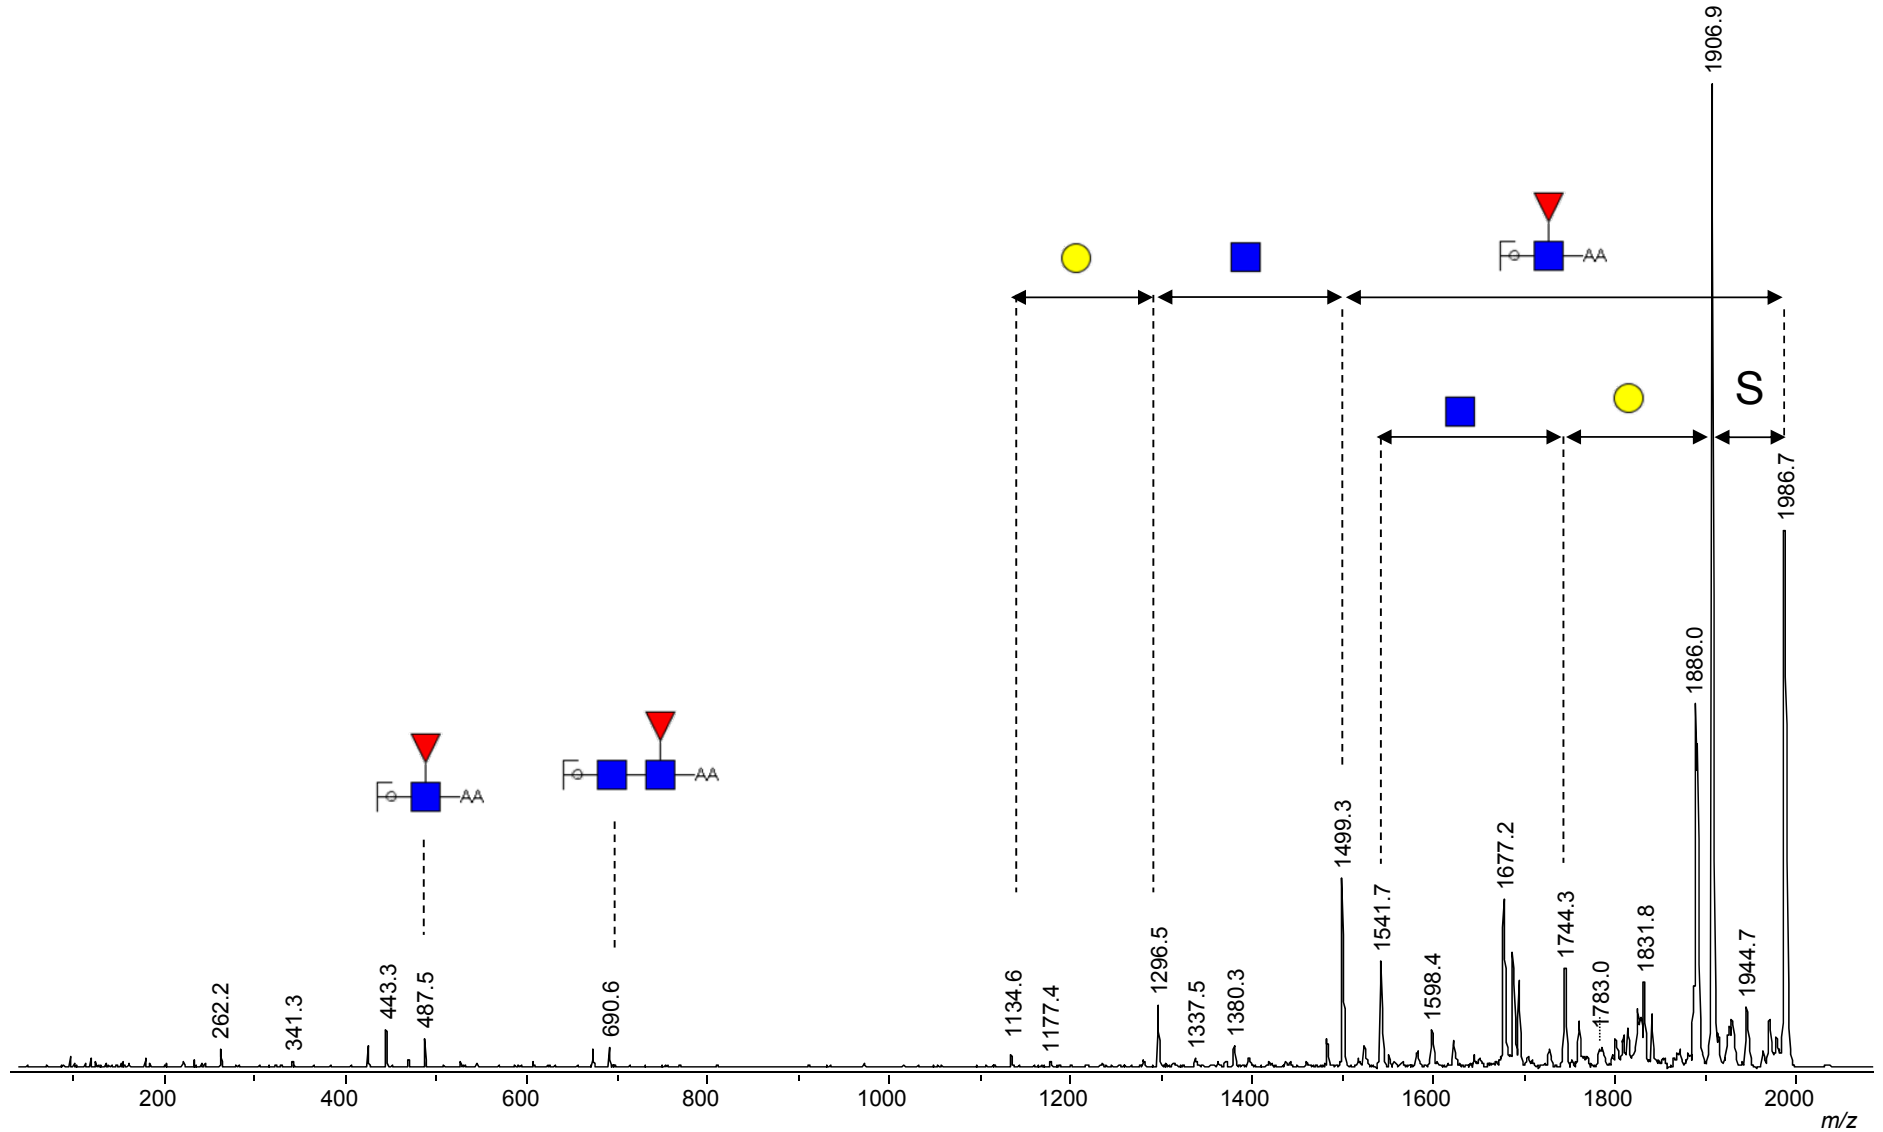



# Spectrum 77

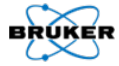

## Glycan Search Report

Glycan: 34

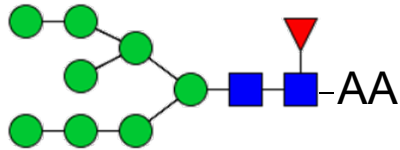

Project path: /N-glycans cancer/25148/comp\_25148.mgf

MS data: K:/Cancer-CCR/N-glycans raw data\_MS/LC-MS of the discriminators/25148\_02.d/comp\_25148.mgf

Parent m/z: 994.8585 2+

Score: 35.550

Composition: Hex8HexNAc2dHex1-AA

Intensity coverage [%]: 0.69

Accession: 29021

Fragment coverage [%]: 0.18

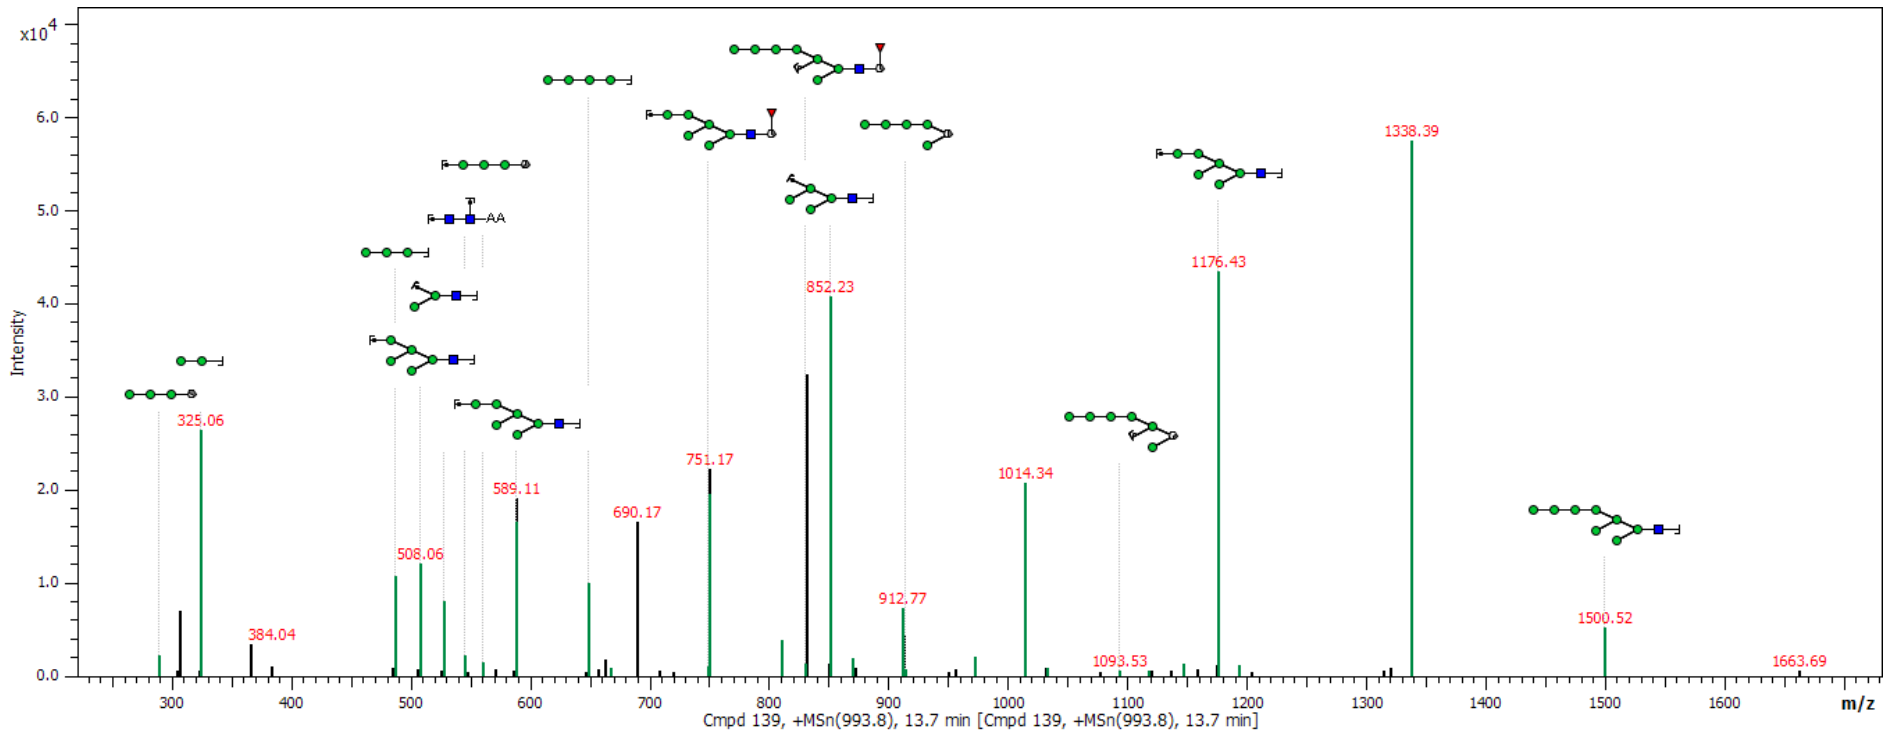

# Spectrum 78



## Glycan Search Report

Glycan: 22

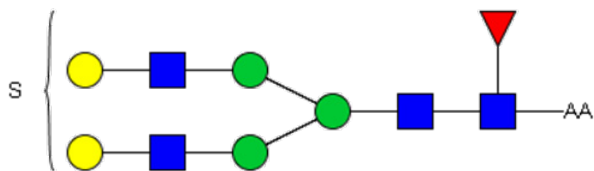

**Project path:** /N-glycans cancer/25145/comp\_25145.mgf

**MS data:** K:/Cancer-CCR/N-glycans raw data\_MS/LC-MS of the discriminators/25145\_02.d/comp\_25145.mgf

**Parent m/z:** 995.8853 2+

**Score:** 26.863

**Composition:** Hex3HexNAc6dHex1-AA

**Intensity coverage [%]:** 0.48

**Accession:** 1488

**Fragment coverage [%]:** 0.15

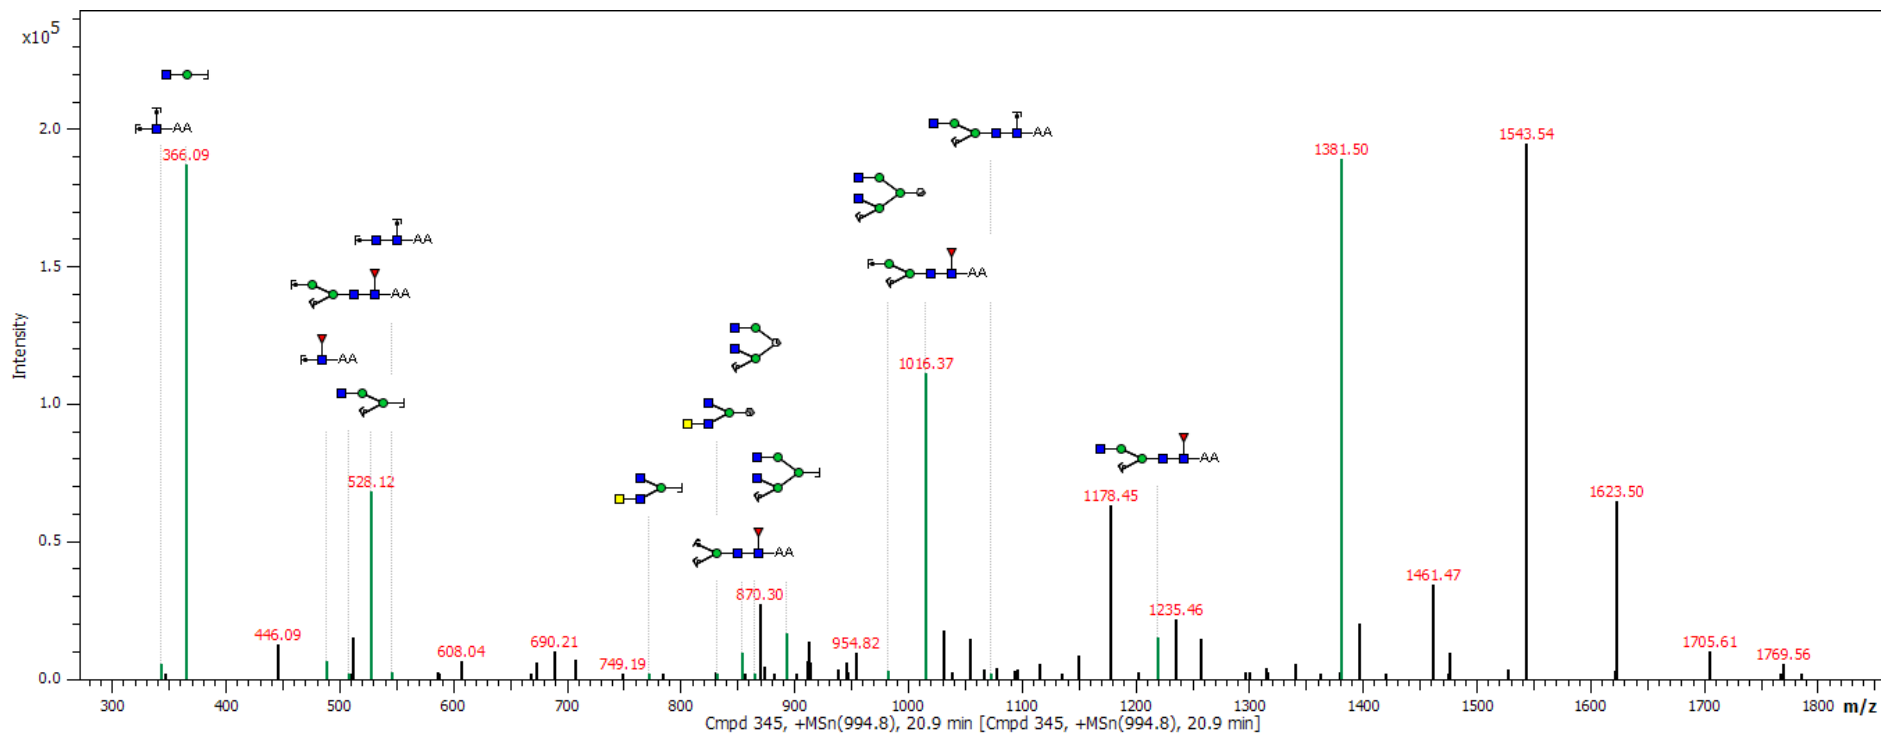

# Spectrum 79



## Glycan Search Report

Glycan: 10

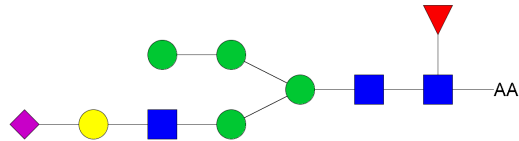

**Project path:** /N-glycans cancer/25147/comp\_25147.mgf

**MS data:** K:/Cancer-CCR/N-glycans raw data\_MS/LC-MS of the discriminators/25147\_02.d/comp\_25147.mgf

**Parent m/z:** 998.8667 2+

**Score:** 46.613

**Composition:** Hex5HexNAc3NeuAc1dHex1-AA

**Intensity coverage [%]:** 0.89

**Accession:** 36628

**Fragment coverage [%]:** 0.24

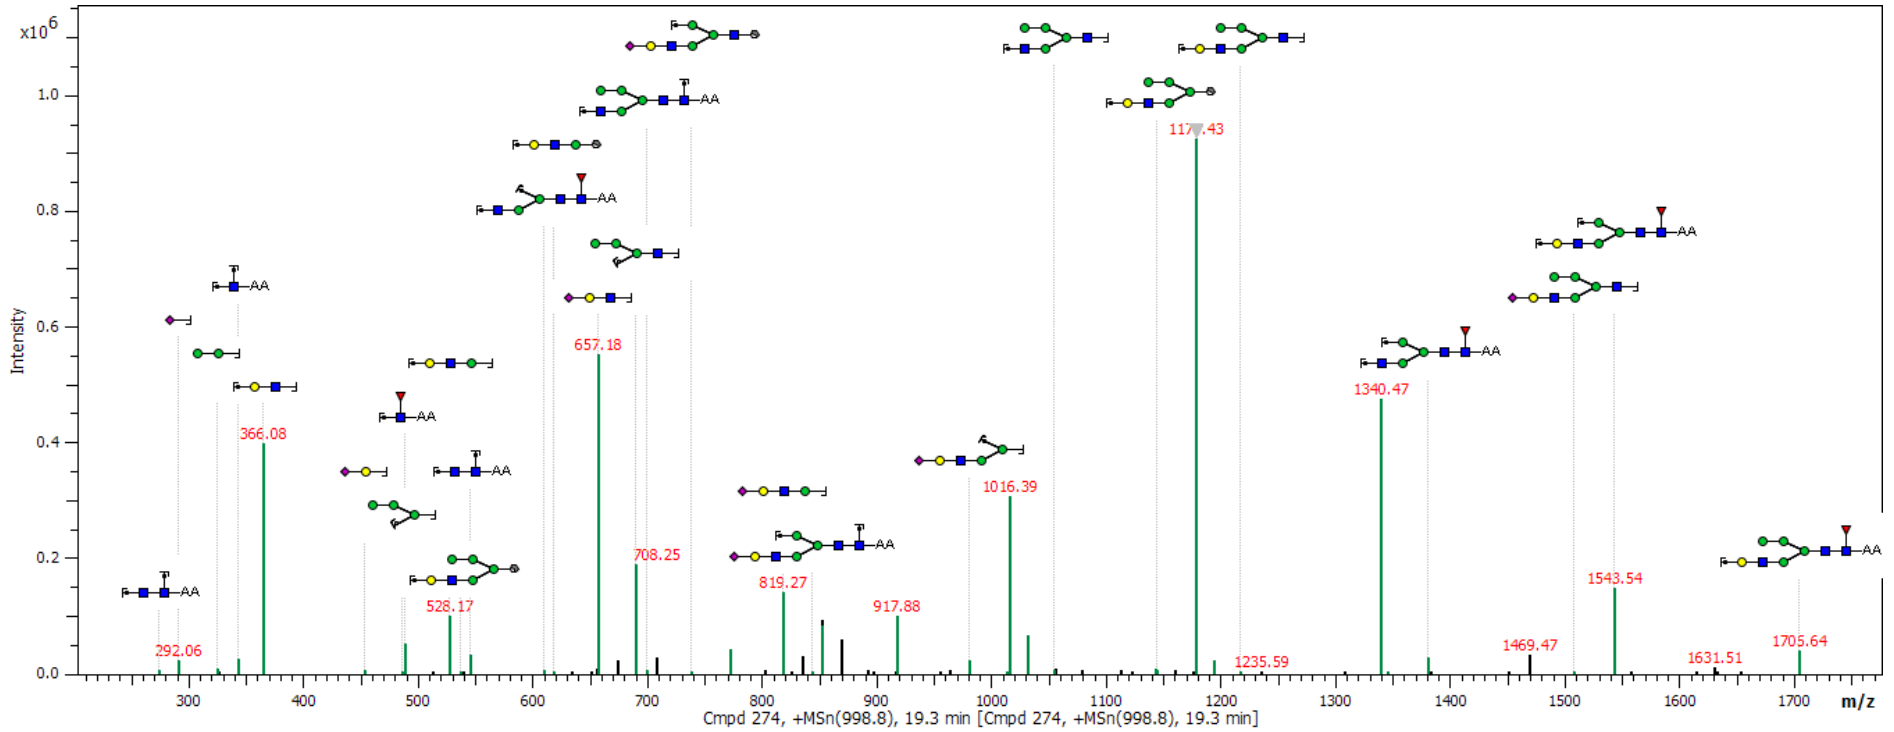

# Spectrum 80



## Glycan Search Report

Glycan: 1

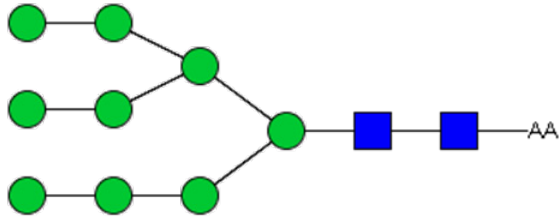

**Project path:** /N-glycans cancer/25148/comp\_25148.mgf  
**MS data:** K:/Cancer-CCR/N-glycans raw data\_MS/LC-MS of the discriminators/25148\_02.d/comp\_25148.mgf  
**Parent m/z:** 1002.8559 2+      **Score:** 93.455  
**Composition:** Hex9HexNAc2-AA      **Intensity coverage [%]:** 0.75  
**Accession:** 36321      **Fragment coverage [%]:** 1.16

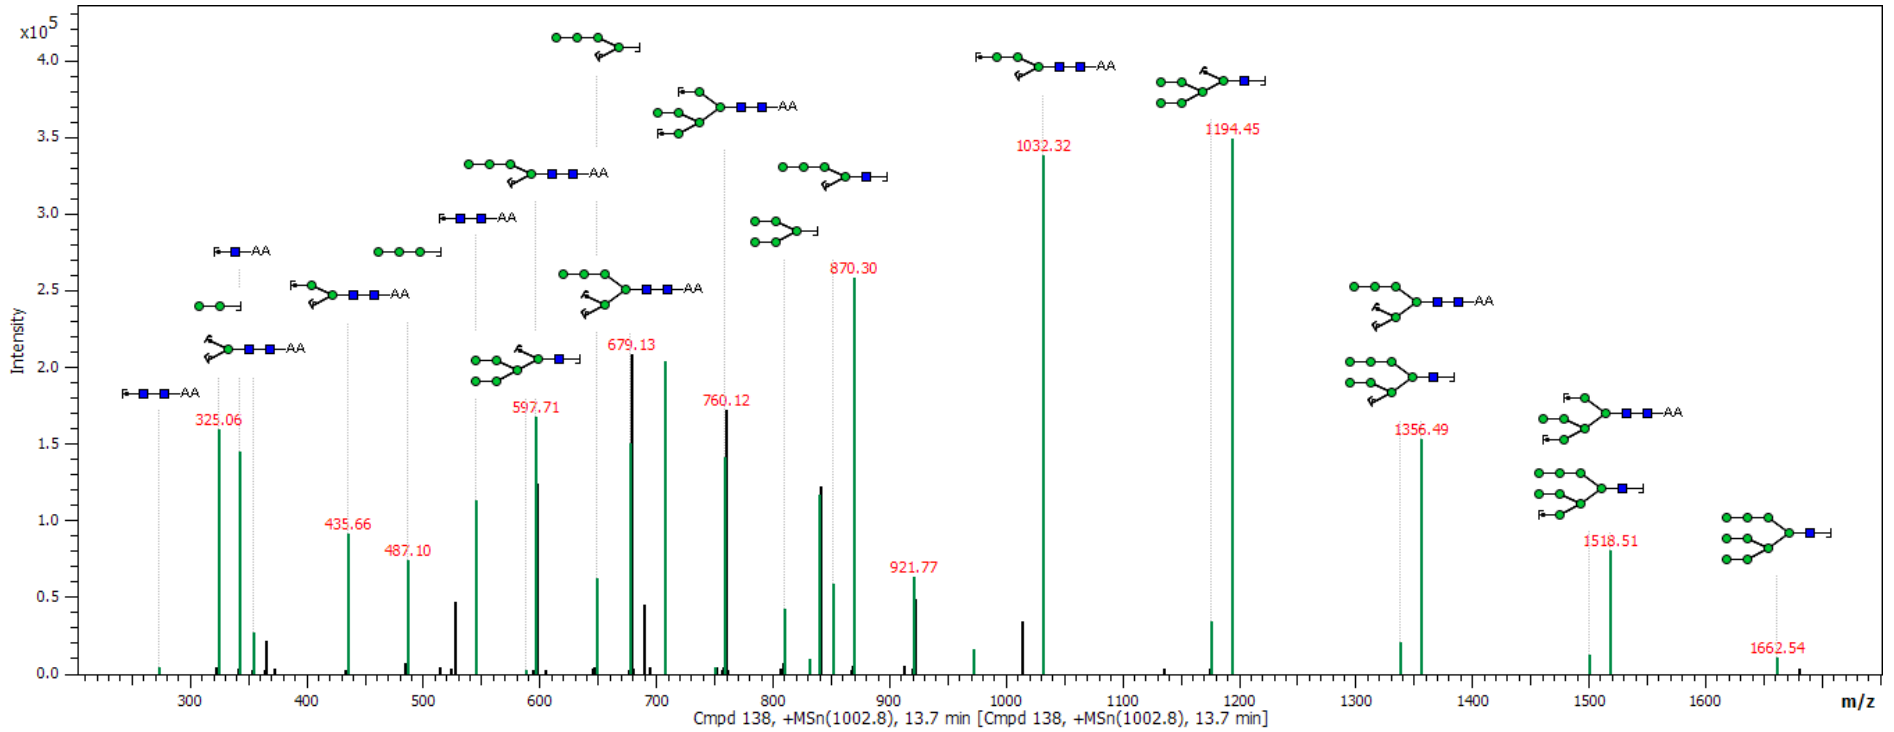

# Spectrum 81



## Glycan Search Report

Glycan: 11

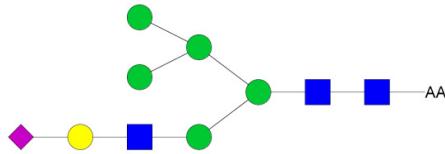

**Project path:** /N-glycans cancer/25147/comp\_25147.mgf  
**MS data:** K:/Cancer-CCR/N-glycans raw data\_MS/LC-MS of the discriminators/25147\_02.d/comp\_25147.mgf  
**Parent m/z:** 1006.8641 2+      **Score:** 45.360  
**Composition:** Hex6HexNAc3NeuAc1-AA      **Intensity coverage [%]:** 0.50  
**Accession:** 36319      **Fragment coverage [%]:** 0.41

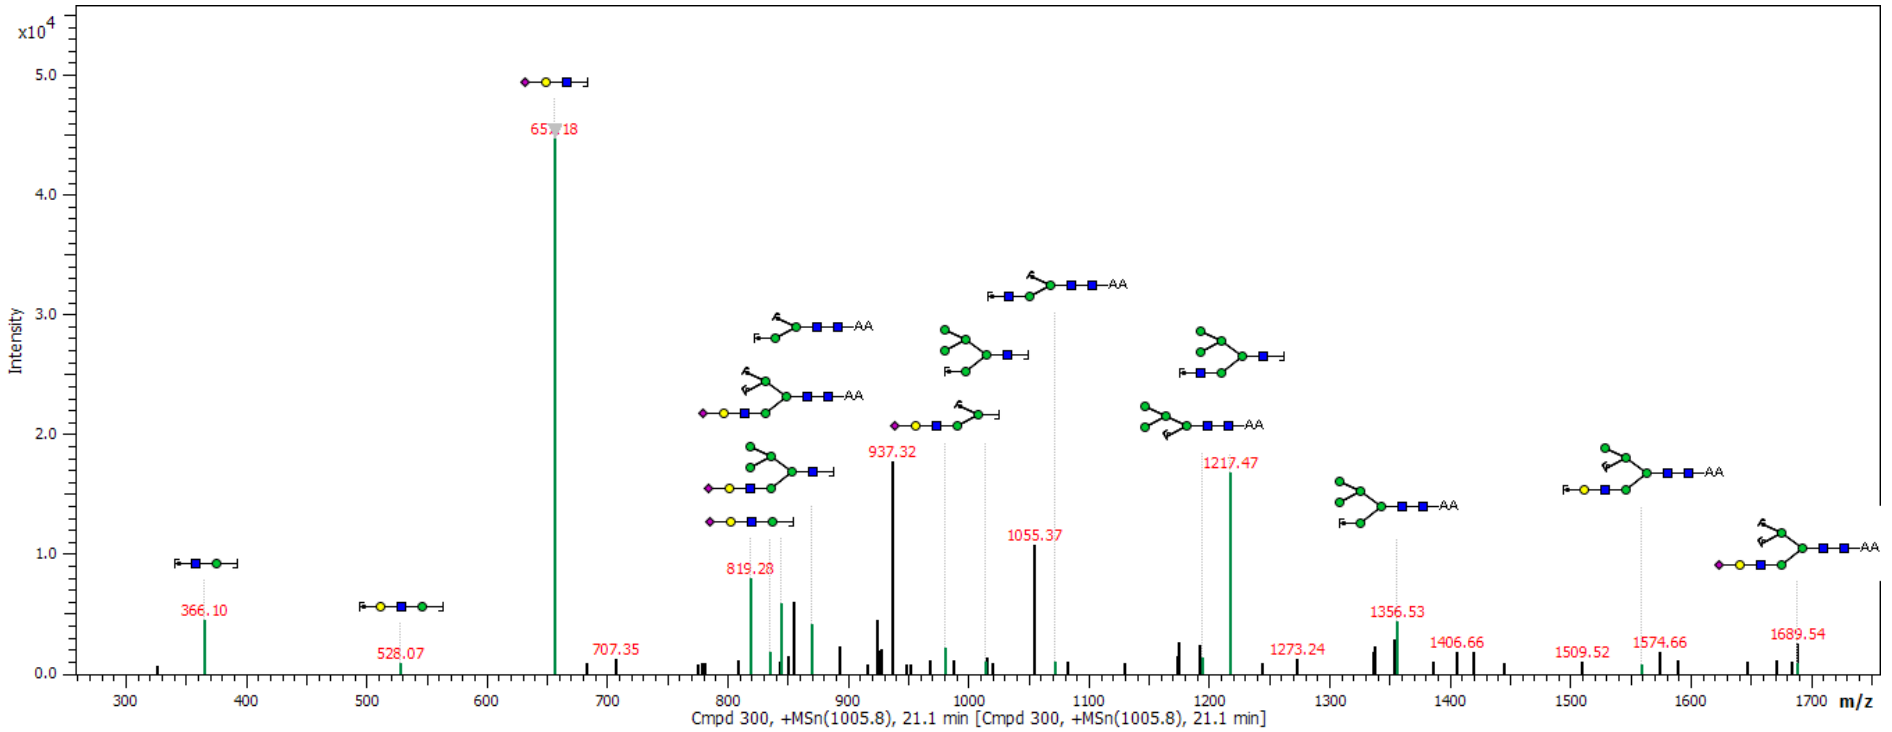

# Spectrum 82

Lift of 2027.7 [M-H]<sup>-</sup>  
S1dHex1Hex4HexNAc5-AA

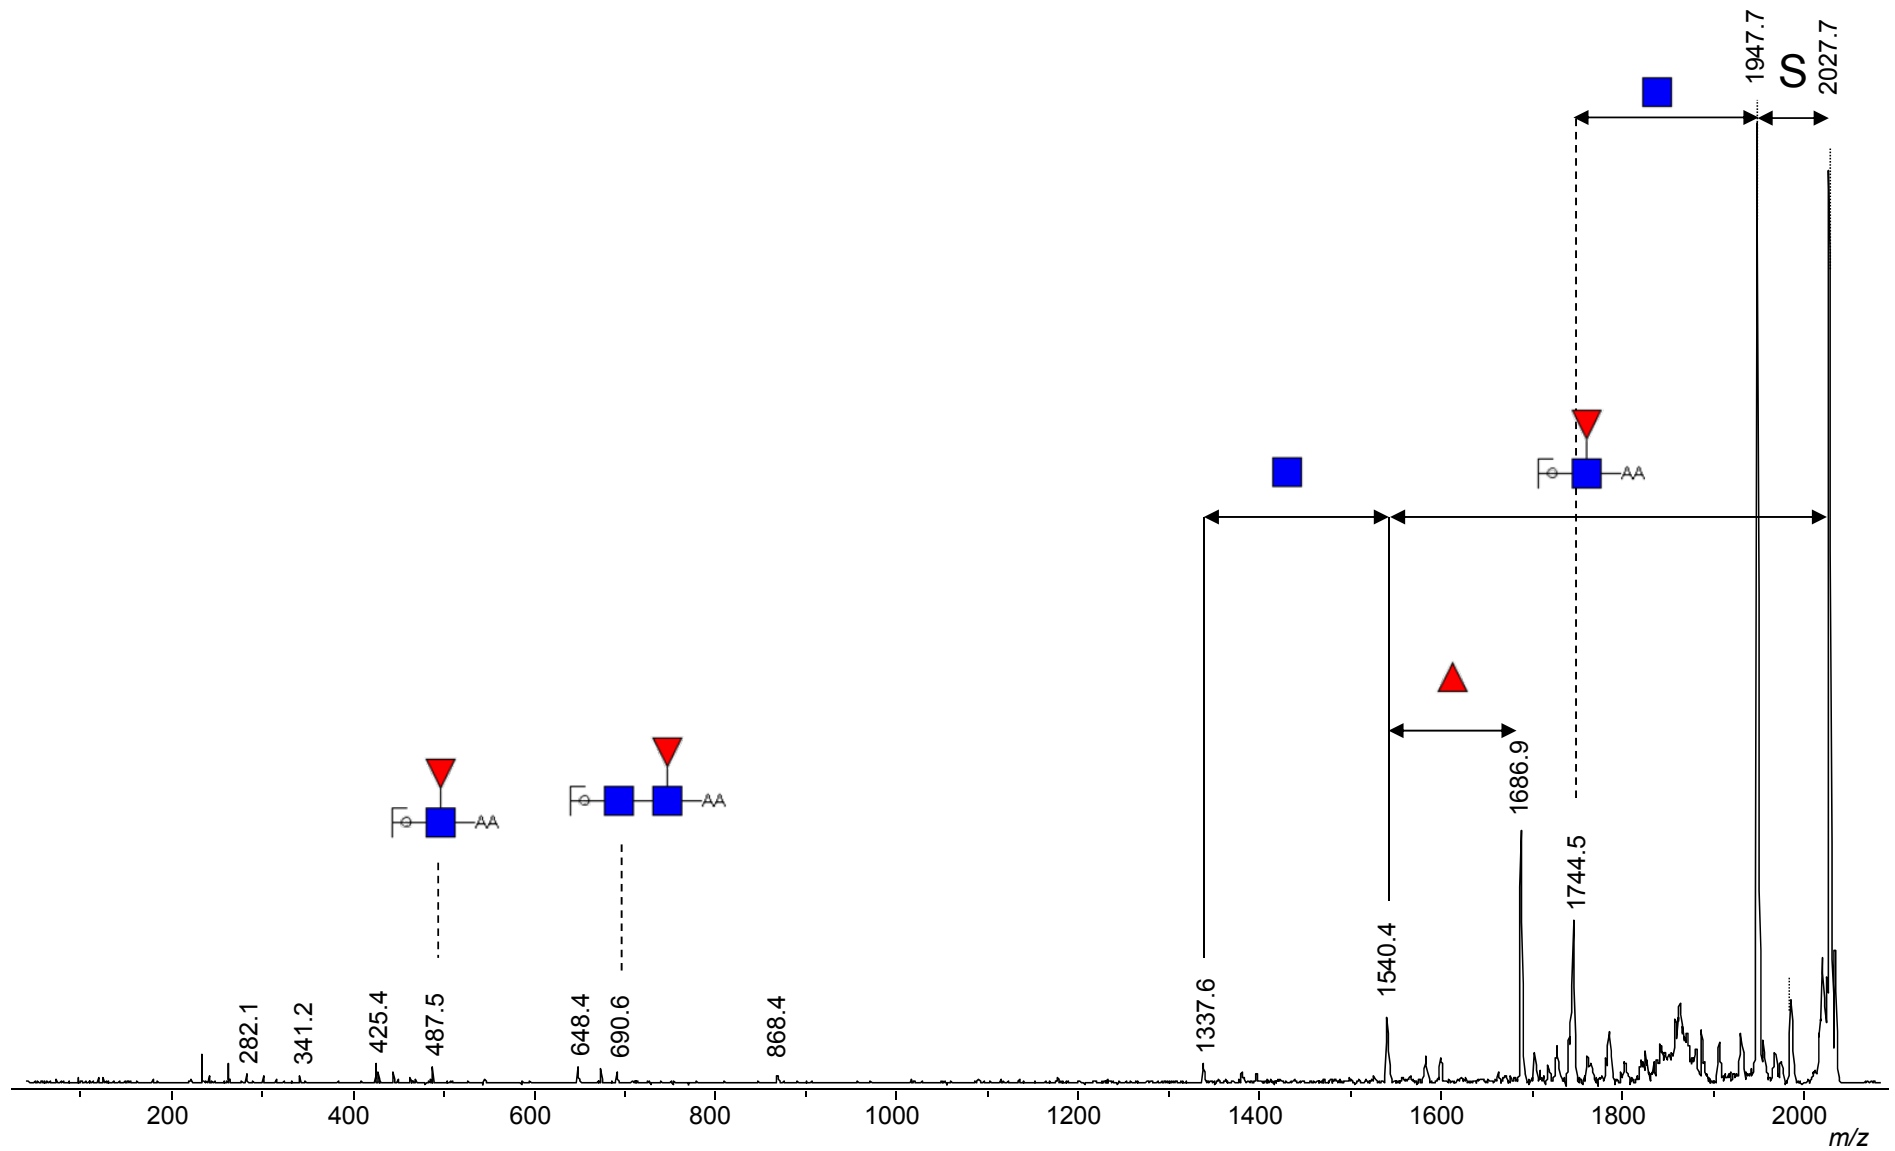

Glycan: 7

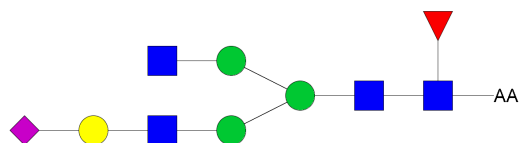

**Project path:** /N-glycans cancer/25145/comp\_25145.mgf  
**MS data:** K:/Cancer-CCR/N-glycans raw data\_MS/LC-MS of the discriminators/25145\_02.d/comp\_25145.mgf  
**Parent m/z:** 1019.3800 2+ **Score:** 72.761  
**Composition:** Hex4HexNAc4NeuAc1dHex1-AA **Intensity coverage [%]:** 0.94  
**Accession:** 36235 **Fragment coverage [%]:** 0.57

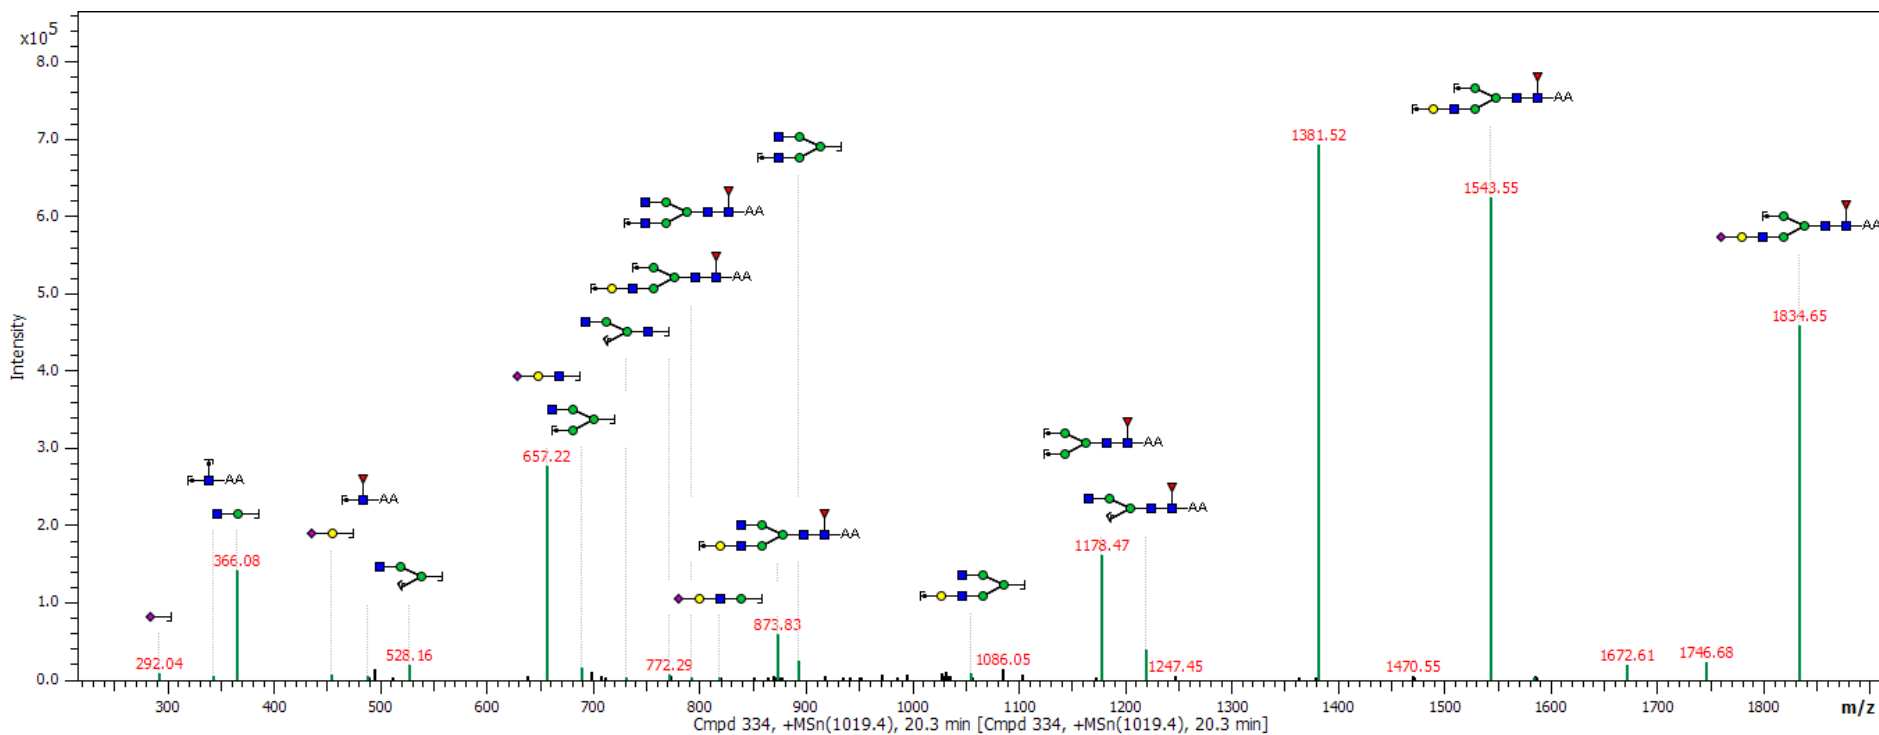

Glycan: 23

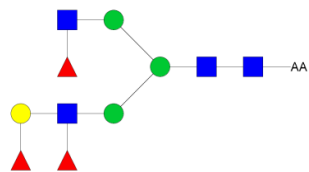

|                      |                                                                                           |                                |        |
|----------------------|-------------------------------------------------------------------------------------------|--------------------------------|--------|
| <b>Project path:</b> | /N-glycans cancer/25147/comp_25147.mgf                                                    |                                |        |
| <b>MS data:</b>      | K:/Cancer-CCR/N-glycans raw data_MS/LC-MS of the discriminators/25147_02.d/comp_25147.mgf |                                |        |
| <b>Parent m/z:</b>   | 1019.8902 2+                                                                              | <b>Score:</b>                  | 32.418 |
| <b>Composition:</b>  | Hex4HexNAc4dHex3-AA                                                                       | <b>Intensity coverage [%]:</b> | 0.57   |
| <b>Accession:</b>    | 29221                                                                                     | <b>Fragment coverage [%]:</b>  | 0.18   |

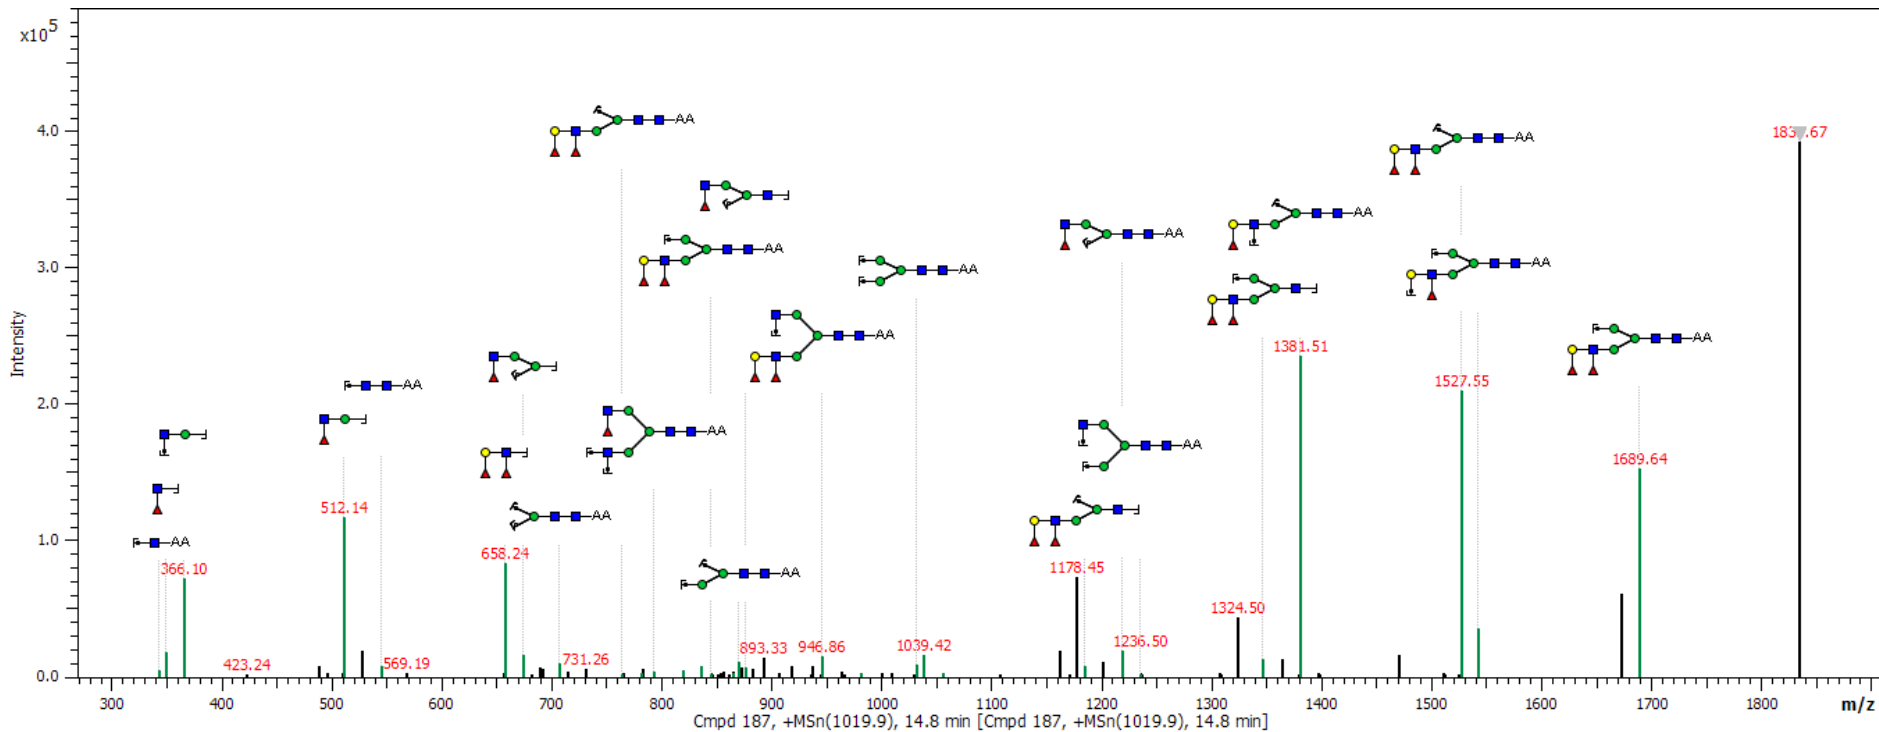





# Spectrum 85

## Glycan Search Report

Glycan: 1

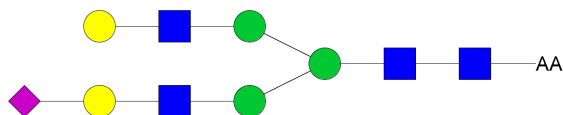

**Project path:** /N-glycans cancer/Lift spectra/CombinedLIFT  
**MS data:** c:/documents and settings/ciabalog/desktop/new folder/lift of 2051.7\_fraction67/0\_d8/1/2051.7000.lif/ 1sref/pdata/1/1r  
**Parent m/z:** 2051.7330 -1      **Score:** 68.847  
**Composition:** Hex5HexNAc4NeuAc1-AA      **Intensity coverage [%]:** 0.56  
**Accession:** 36355      **Fragment coverage [%]:** 0.84

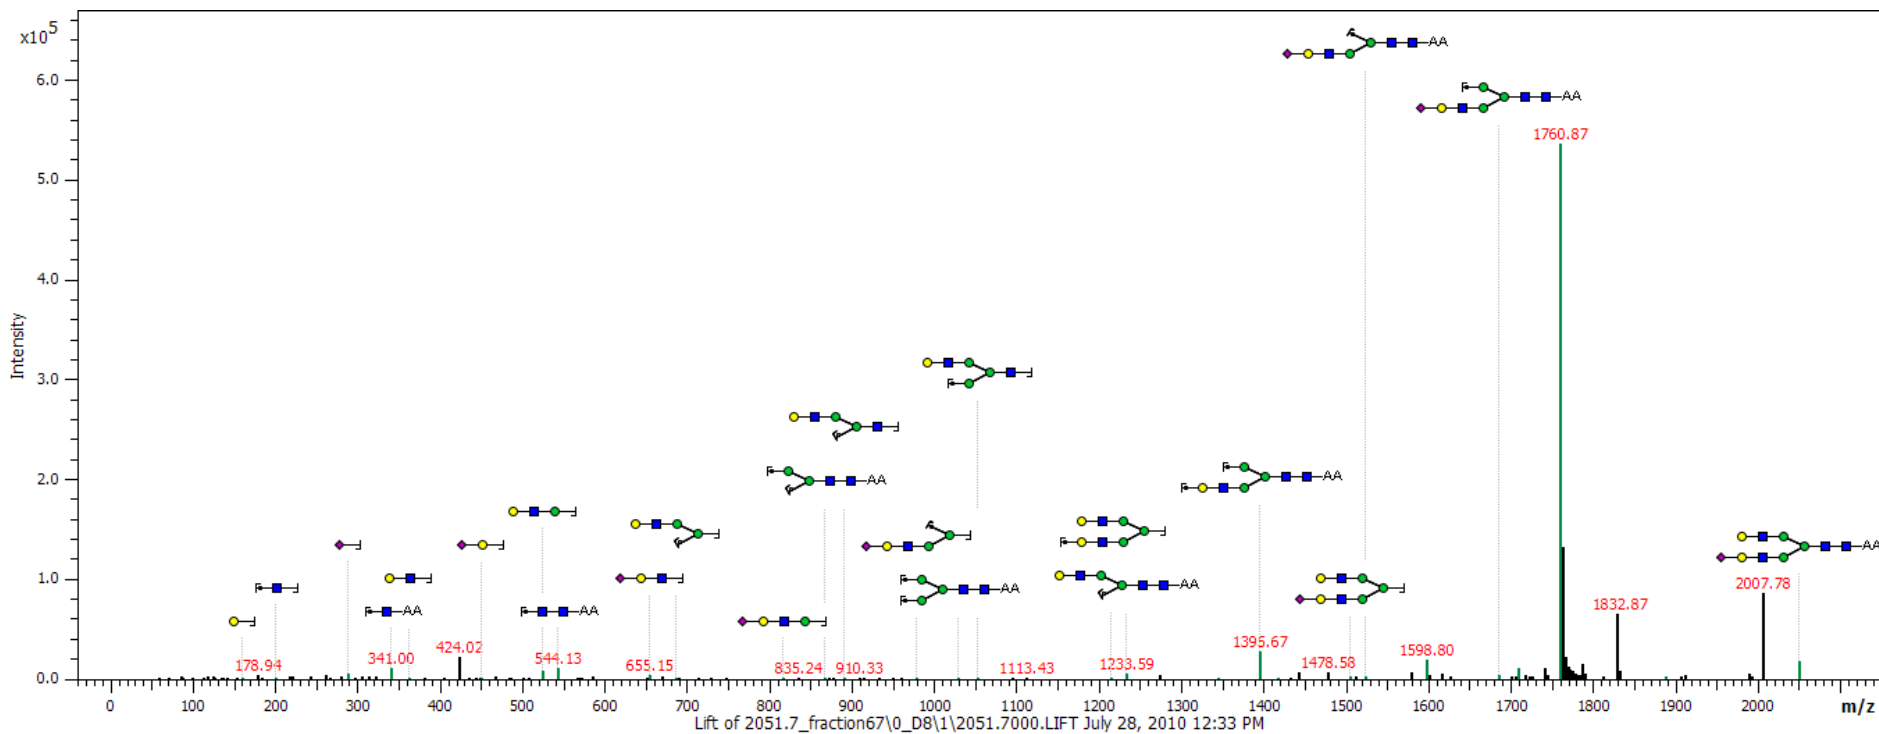



# Spectrum 86

## Glycan Search Report

Glycan: 1

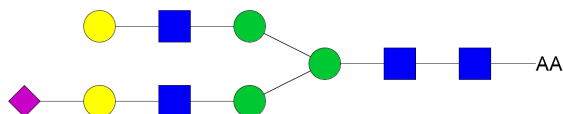

**Project path:** /N-glycans cancer/25147/comp\_25147.mgf  
**MS data:** K:/Cancer-CCR/N-glycans raw data\_MS/LC-MS of the discriminators/25147\_02.d/comp\_25147.mgf  
**Parent m/z:** 685.2540 3+ **Score:** 96.069  
**Composition:** Hex5HexNAc4NeuAc1-AA **Intensity coverage [%]:** 0.92  
**Accession:** 36355 **Fragment coverage [%]:** 1.00

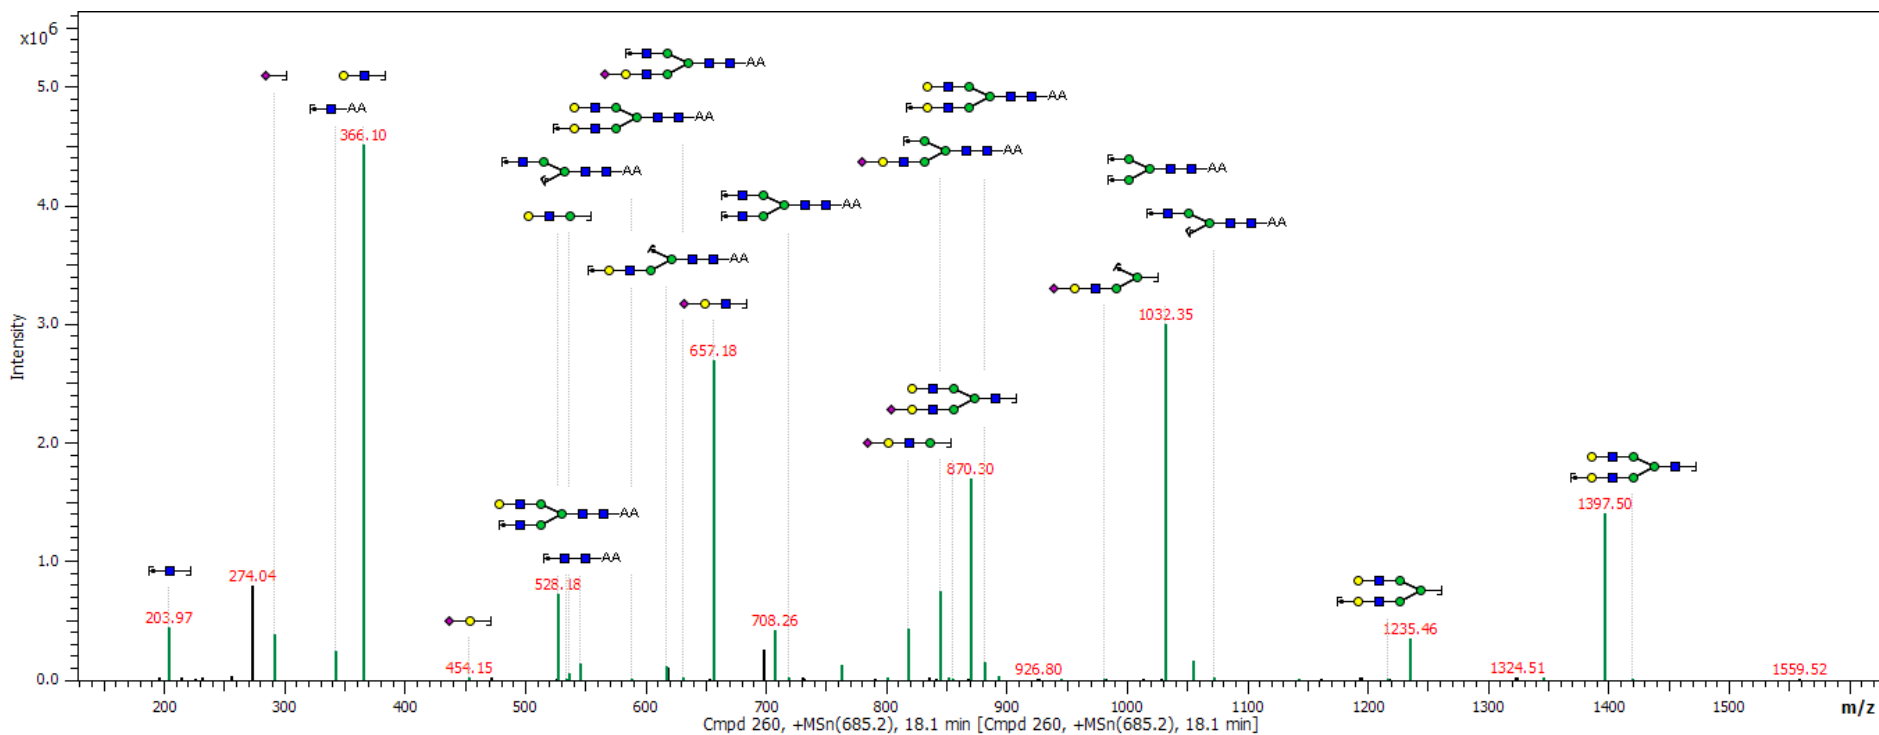

Glycan: 6



**Project path:** /N-glycans cancer/25143/comp\_25143\_01.mgf

**MS data:** K:/Cancer-CCR/N-glycans raw data\_MS/LC-MS of the discriminators/25143\_01.d/comp\_25143\_01.mgf

**Parent m/z:** 1027.3774 2+

**Score:** 67.794

**Composition:** Hex5HexNAc4NeuAc1-AA

**Intensity coverage [%]:** 0.77

**Accession:** 36355

**Fragment coverage [%]:** 0.60

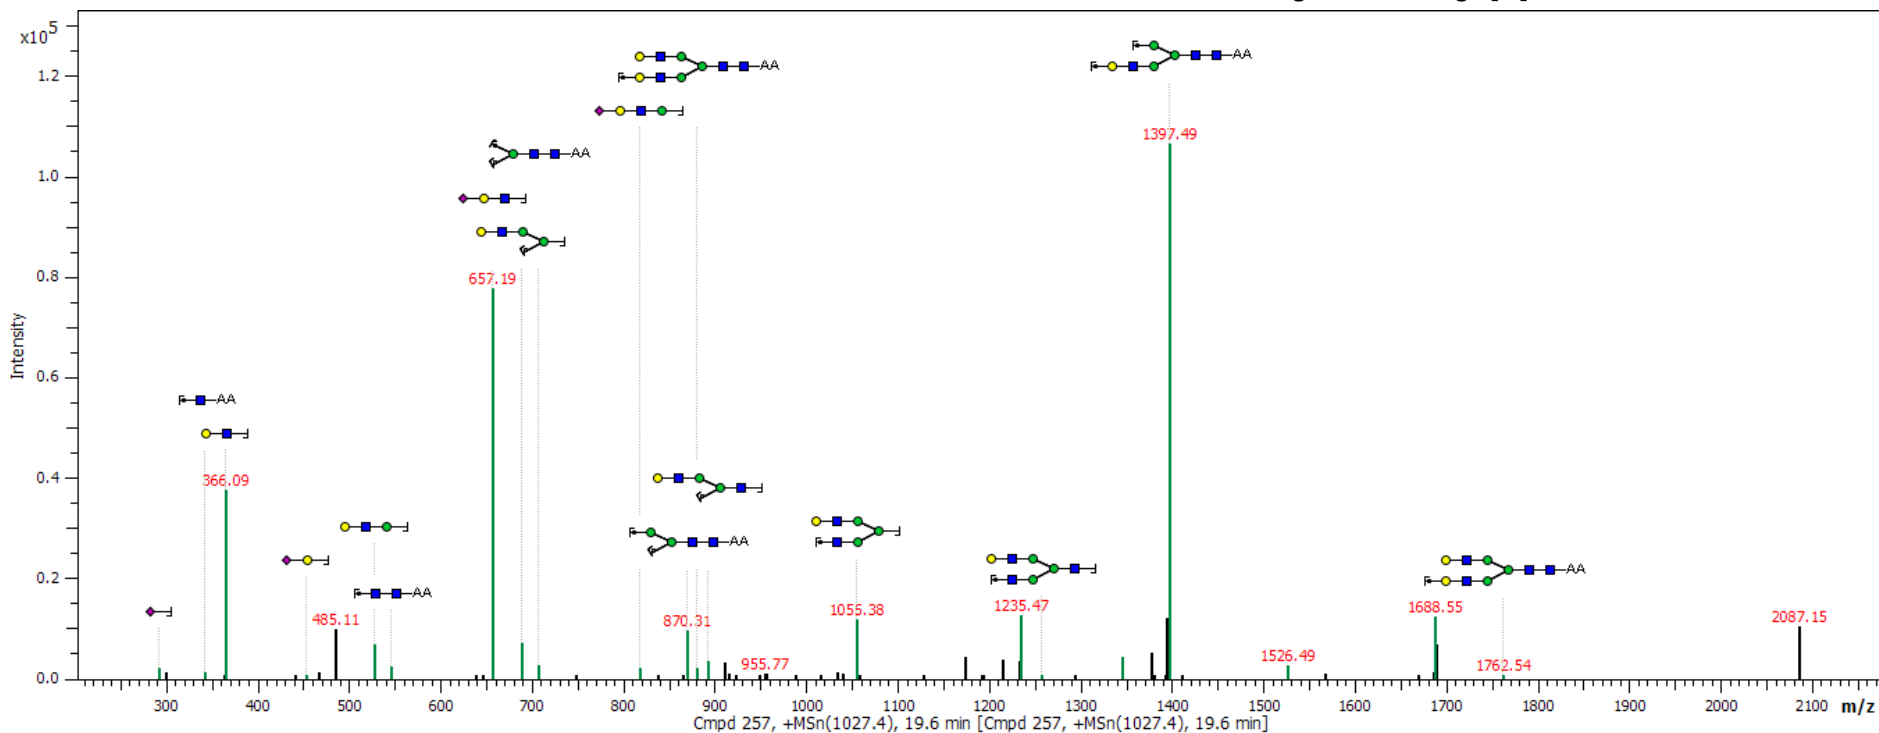

Glycan: 12

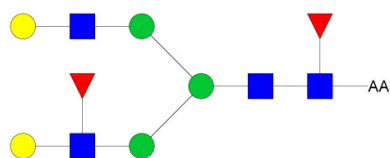

|                      |                                                                                                                        |                                |        |
|----------------------|------------------------------------------------------------------------------------------------------------------------|--------------------------------|--------|
| <b>Project path:</b> | /N-glycans cancer/Lift spectra/CombinedLIFT                                                                            |                                |        |
| <b>MS data:</b>      | c:/documents and settings/ciabalog/desktop/new folder/lift of 2052.7_fraction64/0_c5/1/2052.7000.lif/ 1sref/pdata/1/1r |                                |        |
| <b>Parent m/z:</b>   | 2052.7534 -1                                                                                                           | <b>Score:</b>                  | 35.486 |
| <b>Composition:</b>  | Hex5HexNAc4dHex2-AA                                                                                                    | <b>Intensity coverage [%]:</b> | 0.41   |
| <b>Accession:</b>    | 36267                                                                                                                  | <b>Fragment coverage [%]:</b>  | 0.31   |

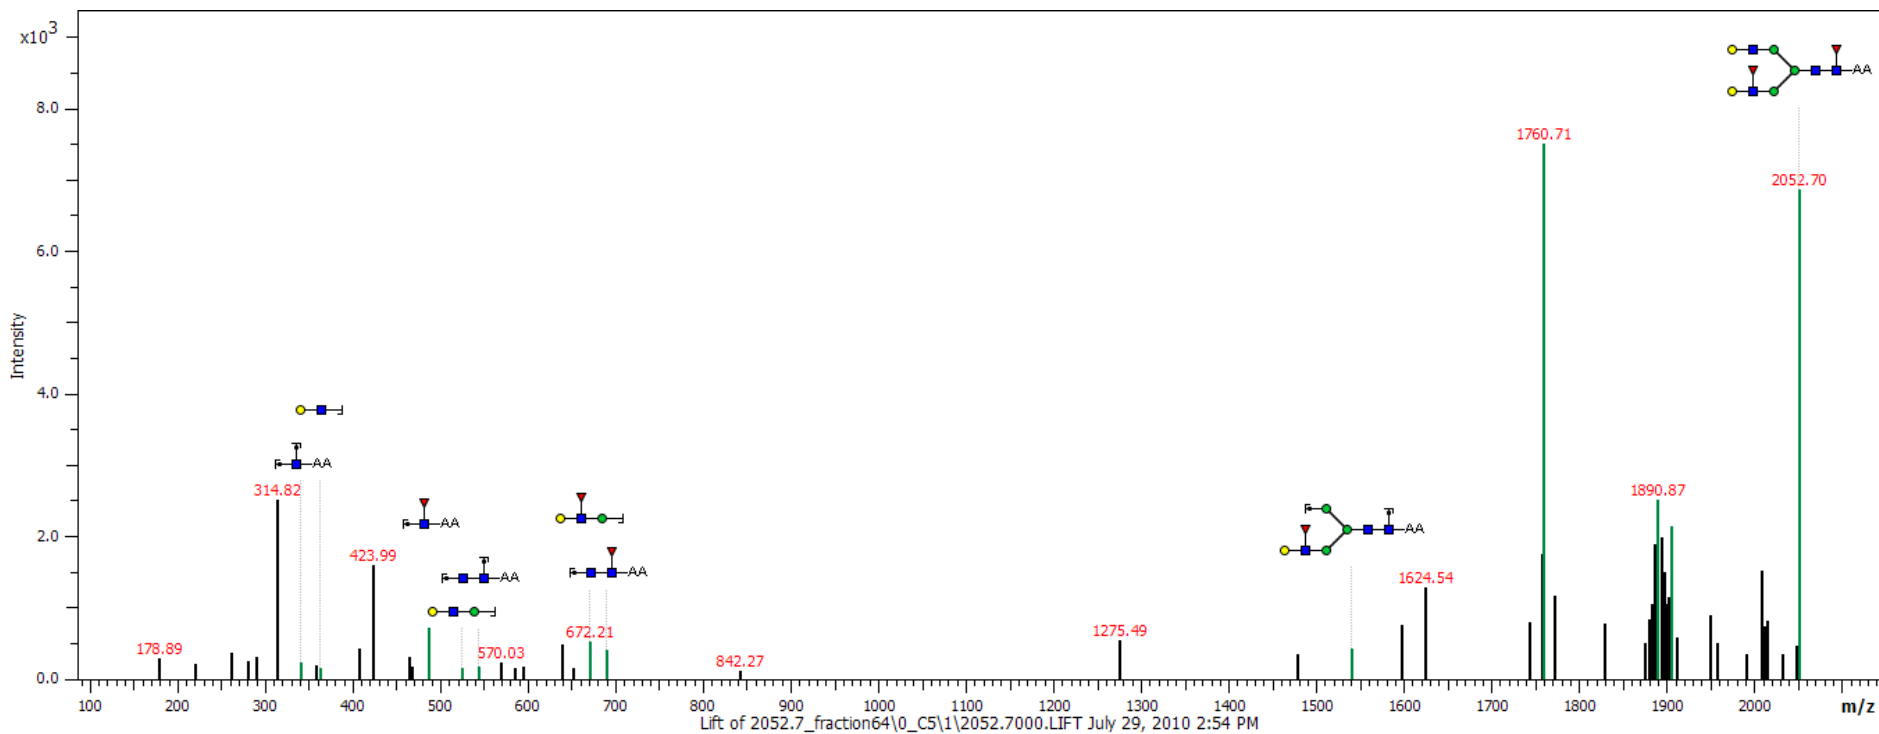

Glycan: 9

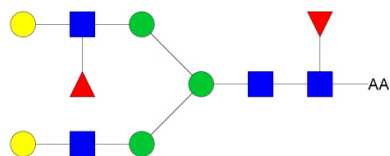

|                      |                                                                                              |    |                                     |
|----------------------|----------------------------------------------------------------------------------------------|----|-------------------------------------|
| <b>Project path:</b> | /N-glycans cancer/25142/comp_25142_01.mgf                                                    |    |                                     |
| <b>MS data:</b>      | K:/Cancer-CCR/N-glycans raw data_MS/LC-MS of the discriminators/25142_01.d/comp_25142_01.mgf |    |                                     |
| <b>Parent m/z:</b>   | 685.5942                                                                                     | 3+ | <b>Score:</b> 34.192                |
| <b>Composition:</b>  | Hex5HexNAc4dHex2-AA                                                                          |    | <b>Intensity coverage [%]:</b> 0.74 |
| <b>Accession:</b>    | 8659                                                                                         |    | <b>Fragment coverage [%]:</b> 0.16  |

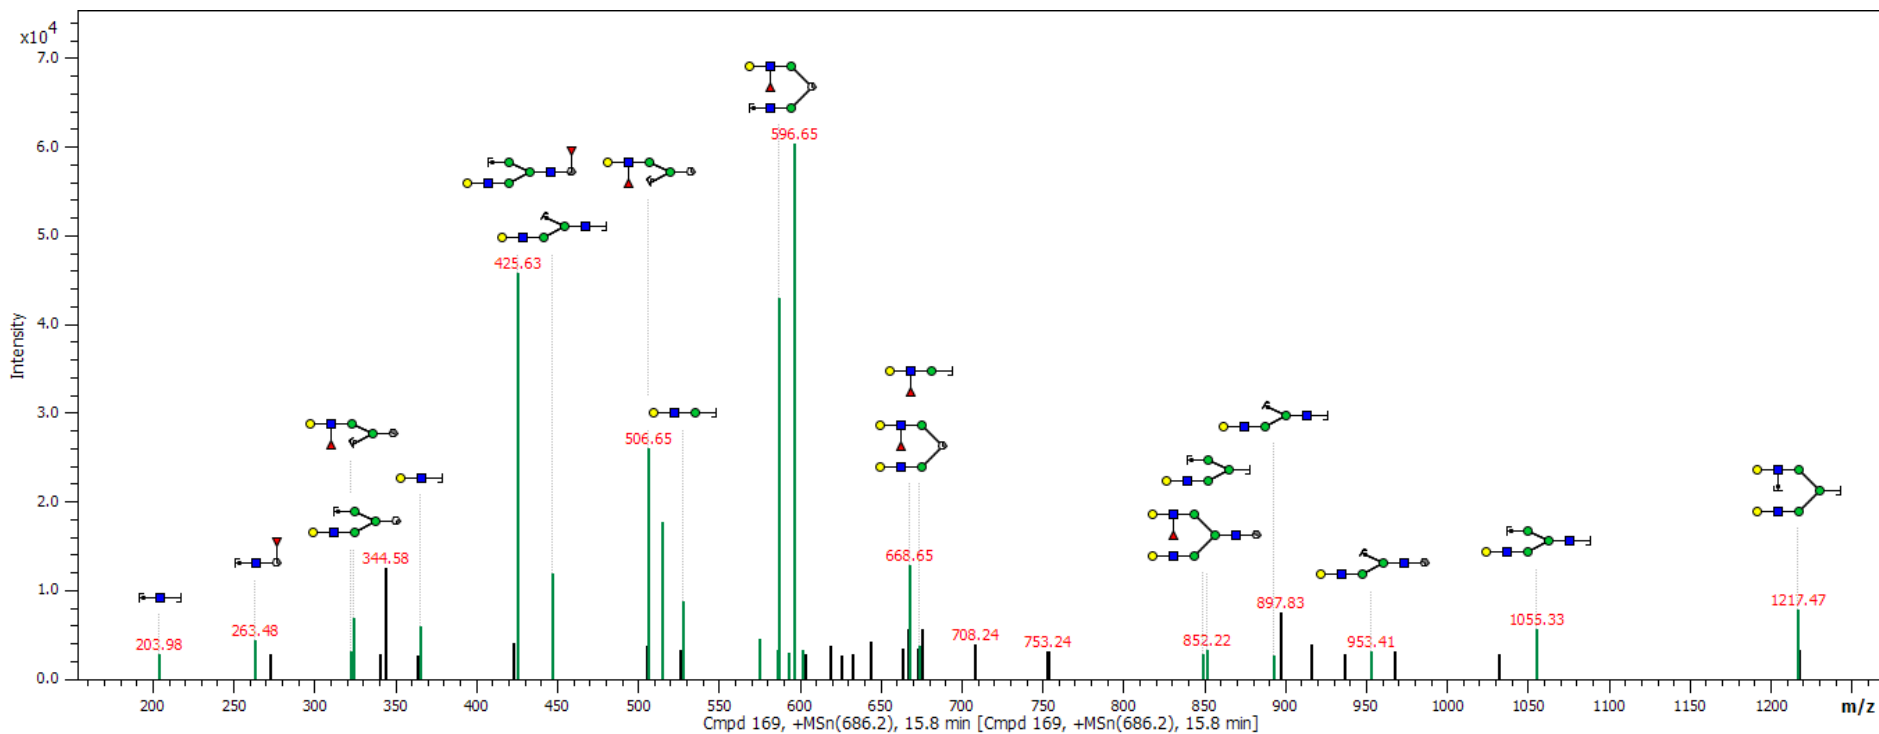

Glycan: 5

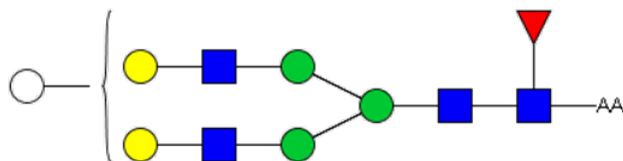

|                      |                                                                                           |                                |        |
|----------------------|-------------------------------------------------------------------------------------------|--------------------------------|--------|
| <b>Project path:</b> | /N-glycans cancer/25147/comp_25147.mgf                                                    | <b>Score:</b>                  | 56.983 |
| <b>MS data:</b>      | K:/Cancer-CCR/N-glycans raw data_MS/LC-MS of the discriminators/25147_02.d/comp_25147.mgf | <b>Intensity coverage [%]:</b> | 0.71   |
| <b>Parent m/z:</b>   | 1035.8851 2+                                                                              | <b>Fragment coverage [%]:</b>  | 0.46   |
| <b>Composition:</b>  | Hex6HexNAc4dHex1-AA                                                                       |                                |        |
| <b>Accession:</b>    | 36271                                                                                     |                                |        |

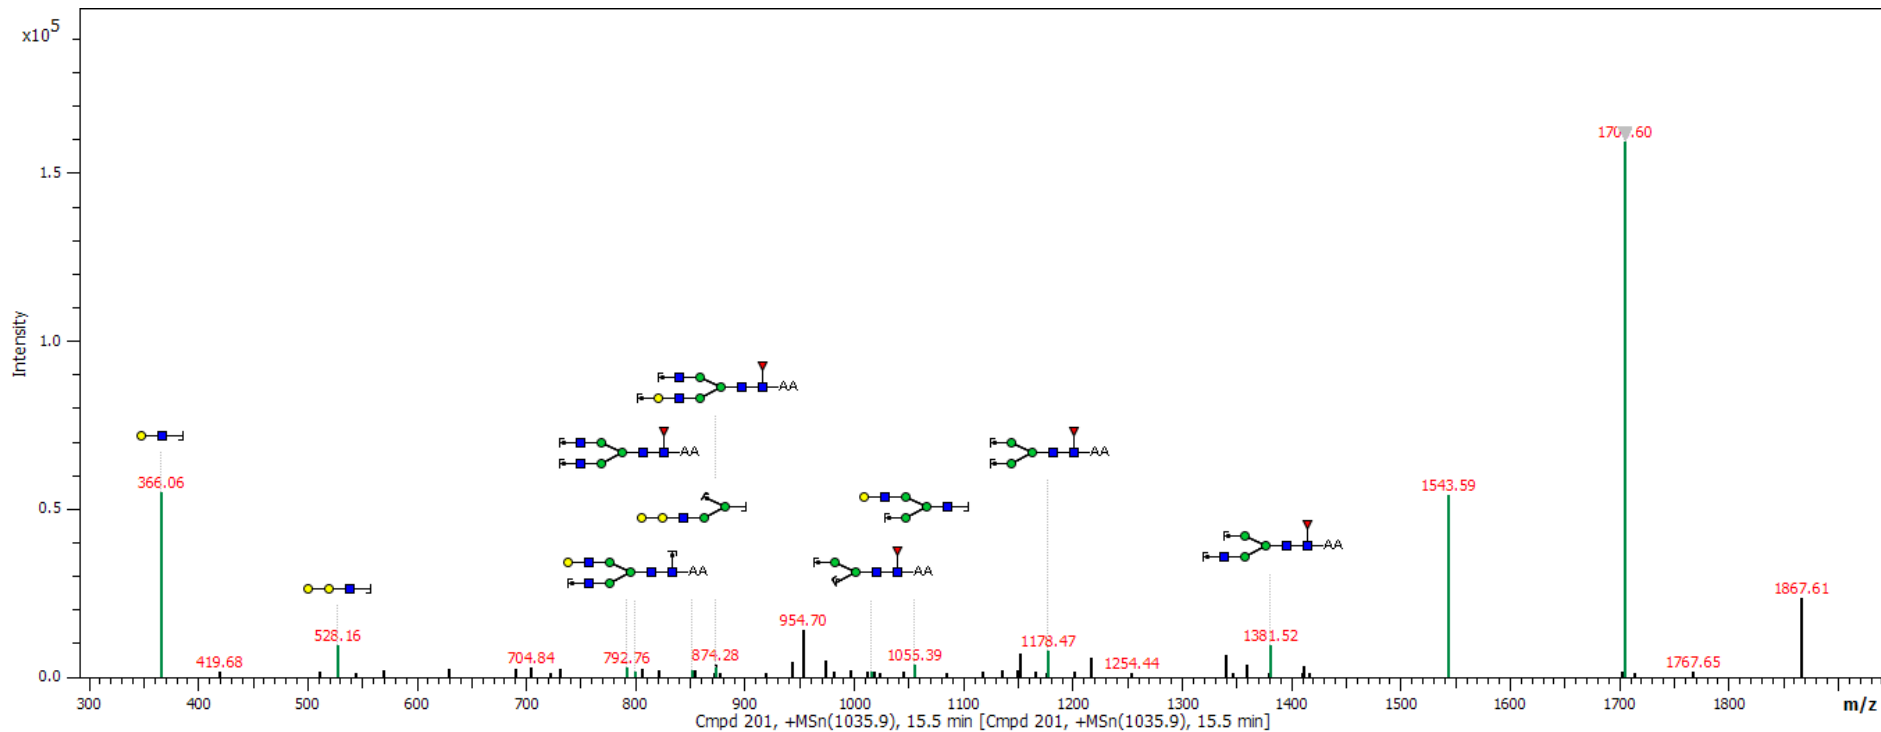

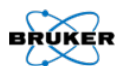

# Spectrum 90

## Glycan Search Report

Glycan: 3

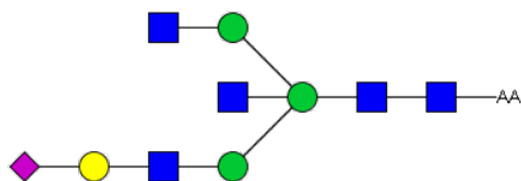

**Project path:** /N-glycans cancer/25143/comp\_25143\_01.mgf  
**MS data:** K:/Cancer-CCR/N-glycans raw data\_MS/LC-MS of the discriminators/25143\_01.d/comp\_25143\_01.mgf  
**Parent m/z:** 1047.8907 2+ **Score:** 86.017  
**Composition:** Hex4HexNAc5NeuAc1-AA **Intensity coverage [%]:** 0.89  
**Accession:** 36342 **Fragment coverage [%]:** 0.83

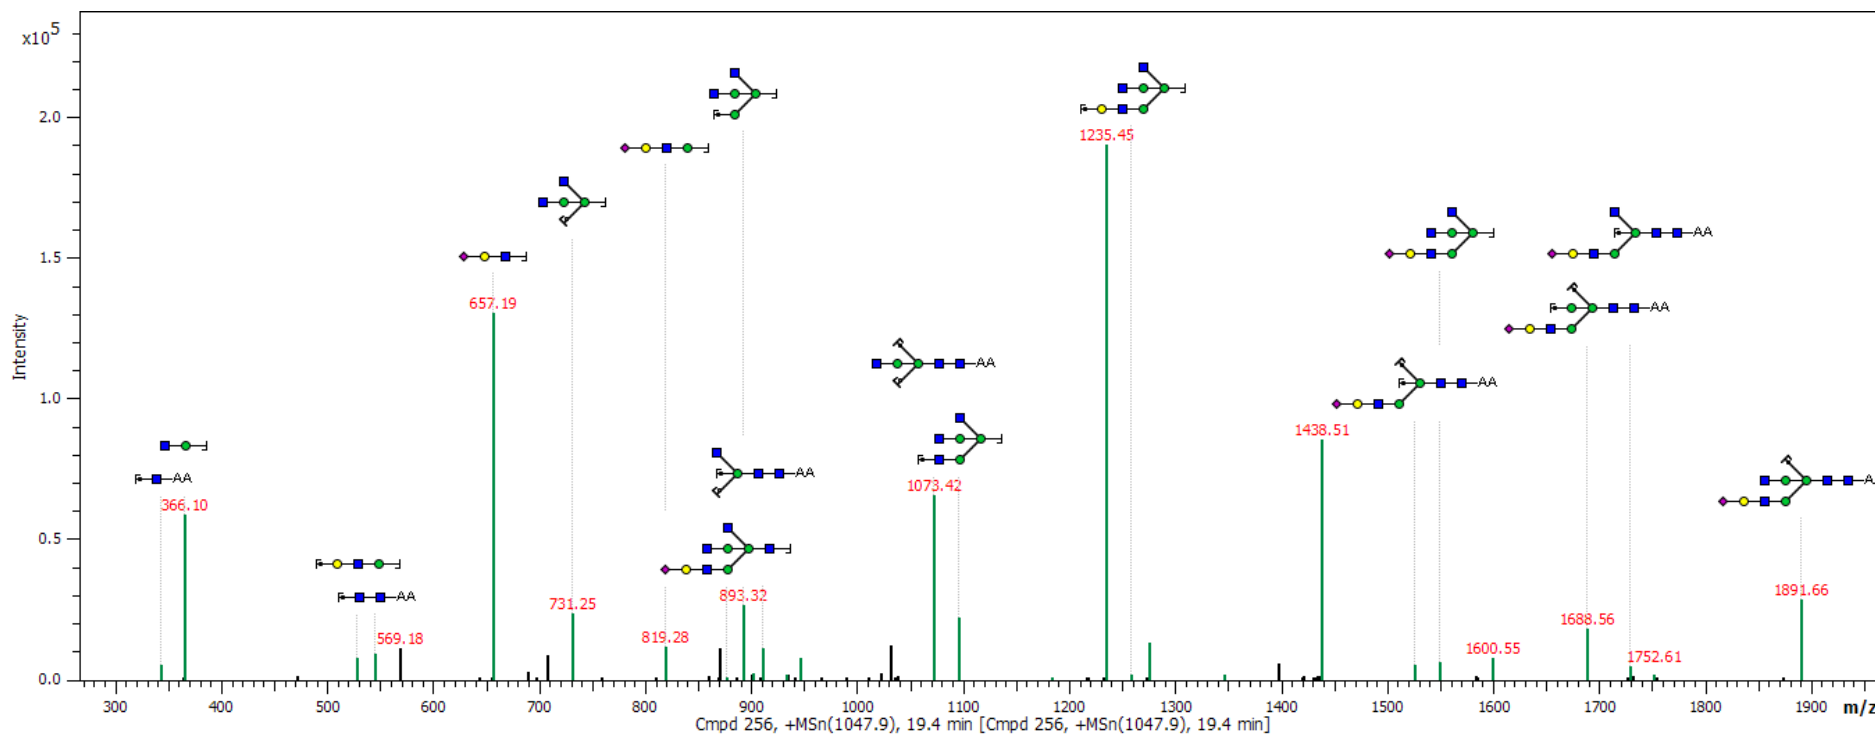



# Spectrum 91

## Glycan Search Report

Glycan: 9

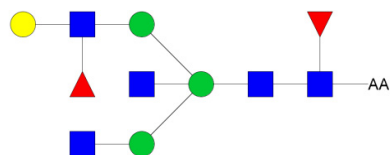

**Project path:** /N-glycans cancer/25147/comp\_25147.mgf  
**MS data:** K:/Cancer-CCR/N-glycans raw data\_MS/LC-MS of the discriminators/25147\_02.d/comp\_25147.mgf  
**Parent m/z:** 1048.4009 2+      **Score:** 48.304  
**Composition:** Hex4HexNAc5dHex2-AA      **Intensity coverage [%]:** 0.89  
**Accession:** 5779      **Fragment coverage [%]:** 0.26

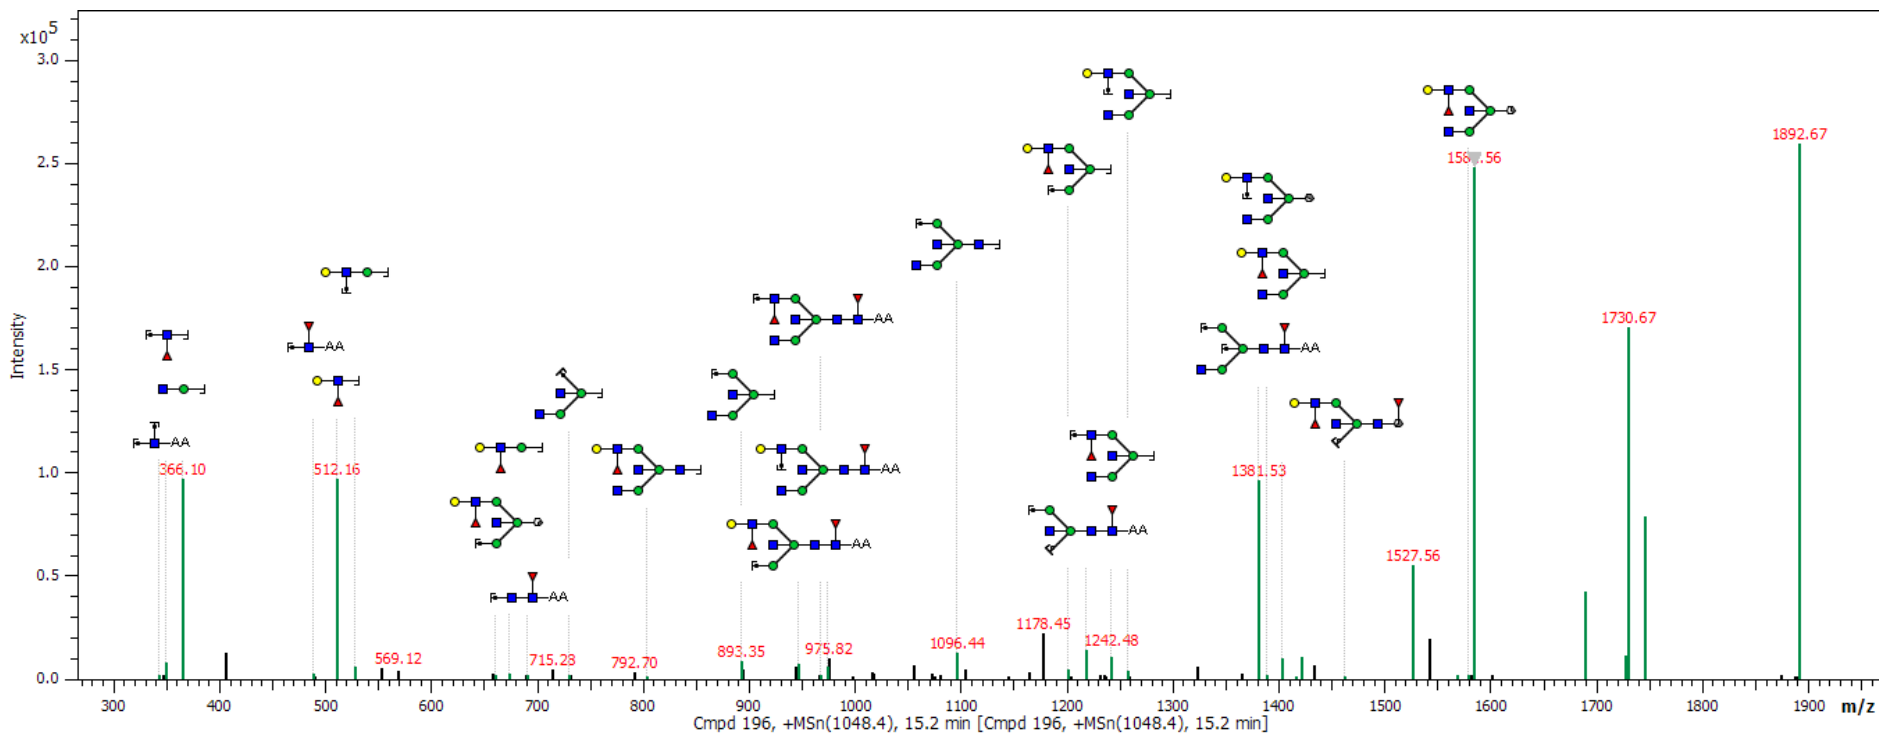





# Spectrum 92

## Glycan Search Report

Glycan: 10

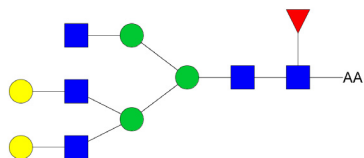

**Project path:** /N-glycans cancer/25143/comp\_25143\_01.mgf

**MS data:** K:/Cancer-CCR/N-glycans raw data\_MS/LC-MS of the discriminators/25143\_01.d/comp\_25143\_01.mgf

**Parent m/z:** 1056.3984 2+

**Score:** 54.093

**Composition:** Hex5HexNAc5dHex1-AA

**Intensity coverage [%]:** 0.97

**Accession:** 1043

**Fragment coverage [%]:** 0.30

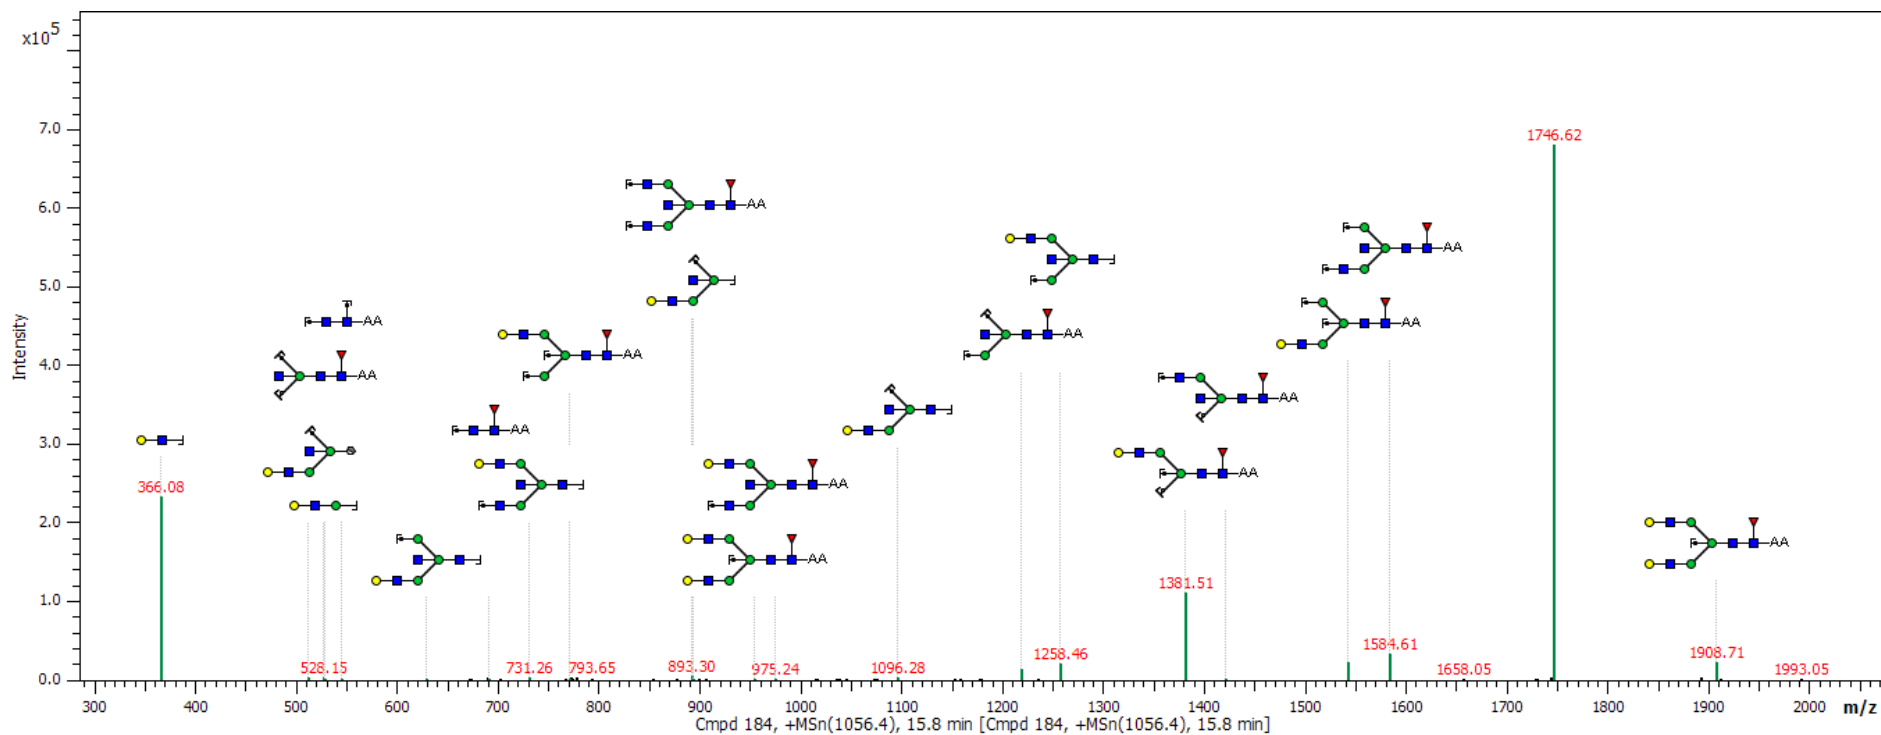



# Spectrum 93

## Glycan Search Report

Glycan: 4

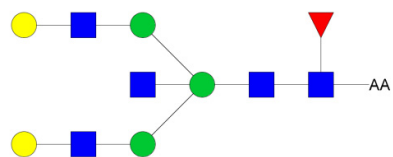

Project path: /N-glycans cancer/25147/comp\_25147.mgf

MS data: K:/Cancer-CCR/N-glycans raw data\_MS/LC-MS of the discriminators/25147\_02.d/comp\_25147.mgf

Parent m/z: 1056.3984 2+

Score: 70.399

Composition: Hex5HexNAc5dHex1-AA

Intensity coverage [%]: 0.82

Accession: 36372

Fragment coverage [%]: 0.60

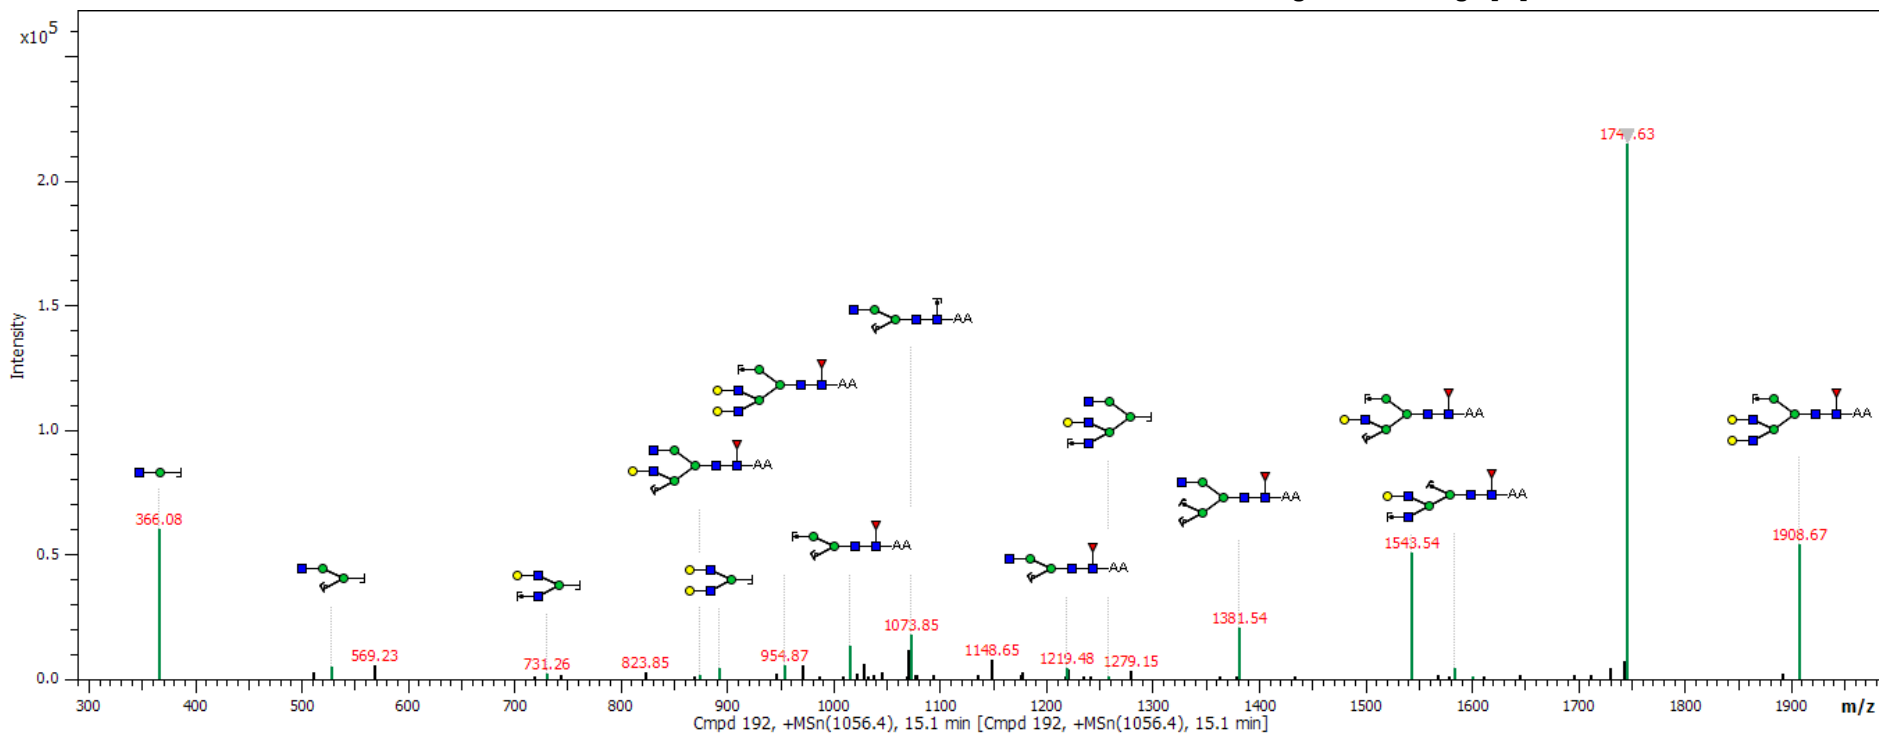

# Spectrum 94

ESI MS/MS of  $[1075.6 + 2H]^{2+}$

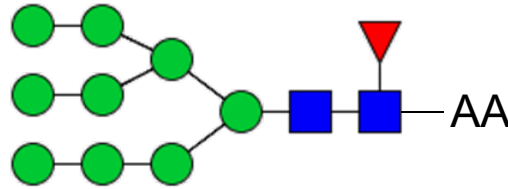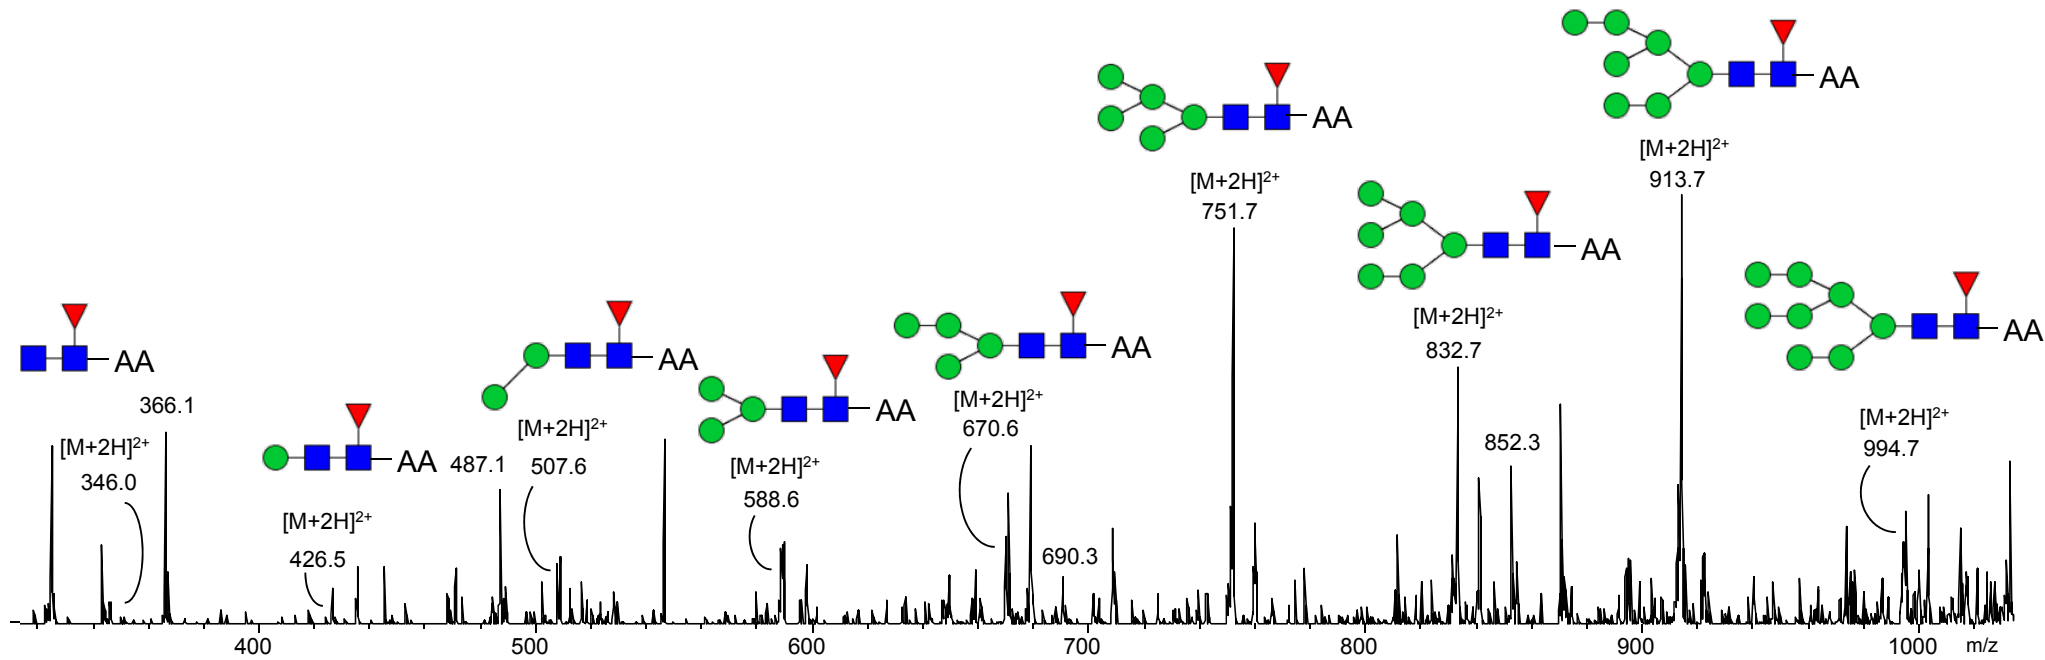



# Spectrum 95

## Glycan Search Report

Glycan: 20

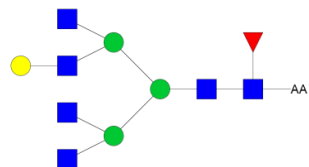

**Project path:** /N-glycans cancer/25145/comp\_25145.mgf  
**MS data:** K:/Cancer-CCR/N-glycans raw data\_MS/LC-MS of the discriminators/25145\_02.d/comp\_25145.mgf  
**Parent m/z:** 1076.9117 2+ **Score:** 31.327  
**Composition:** Hex4HexNAc6dHex1-AA **Intensity coverage [%]:** 0.57  
**Accession:** 566 **Fragment coverage [%]:** 0.17

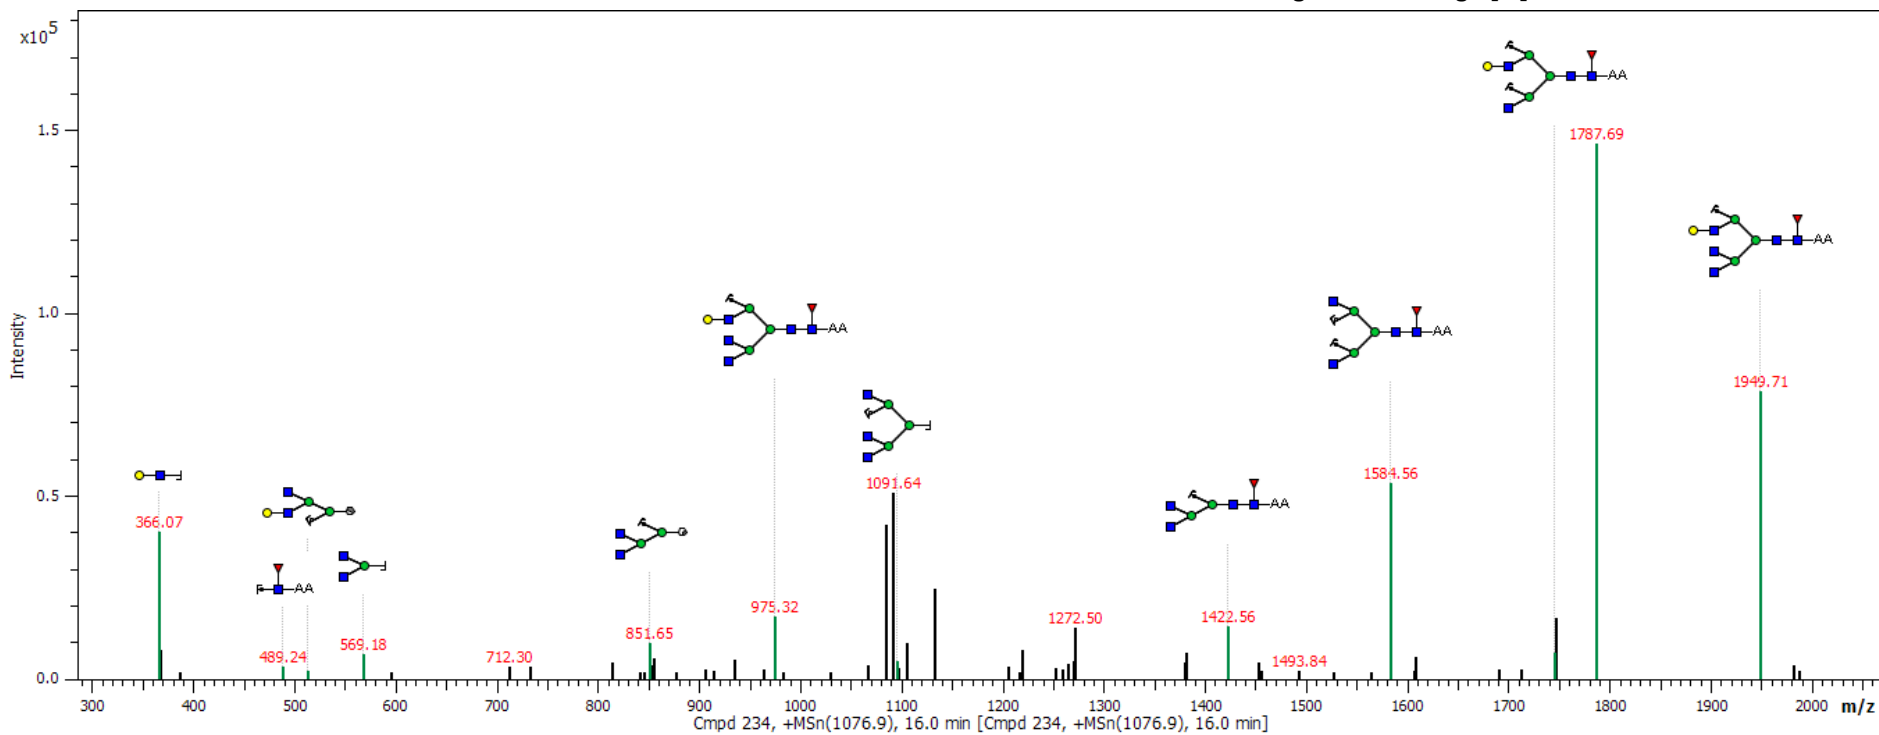

# Spectrum 96

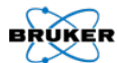

## Glycan Search Report

Glycan: 22

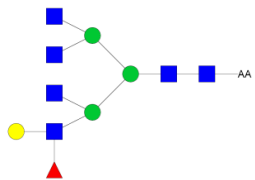

**Project path:** /N-glycans cancer/25147/comp\_25147.mgf  
**MS data:** K:/Cancer-CCR/N-glycans raw data\_MS/LC-MS of the discriminators/25147\_02.d/comp\_25147.mgf  
**Parent m/z:** 1076.9117 2+ **Score:** 34.428  
**Composition:** Hex4HexNAc6dHex1-AA **Intensity coverage [%]:** 0.79  
**Accession:** 30044 **Fragment coverage [%]:** 0.15

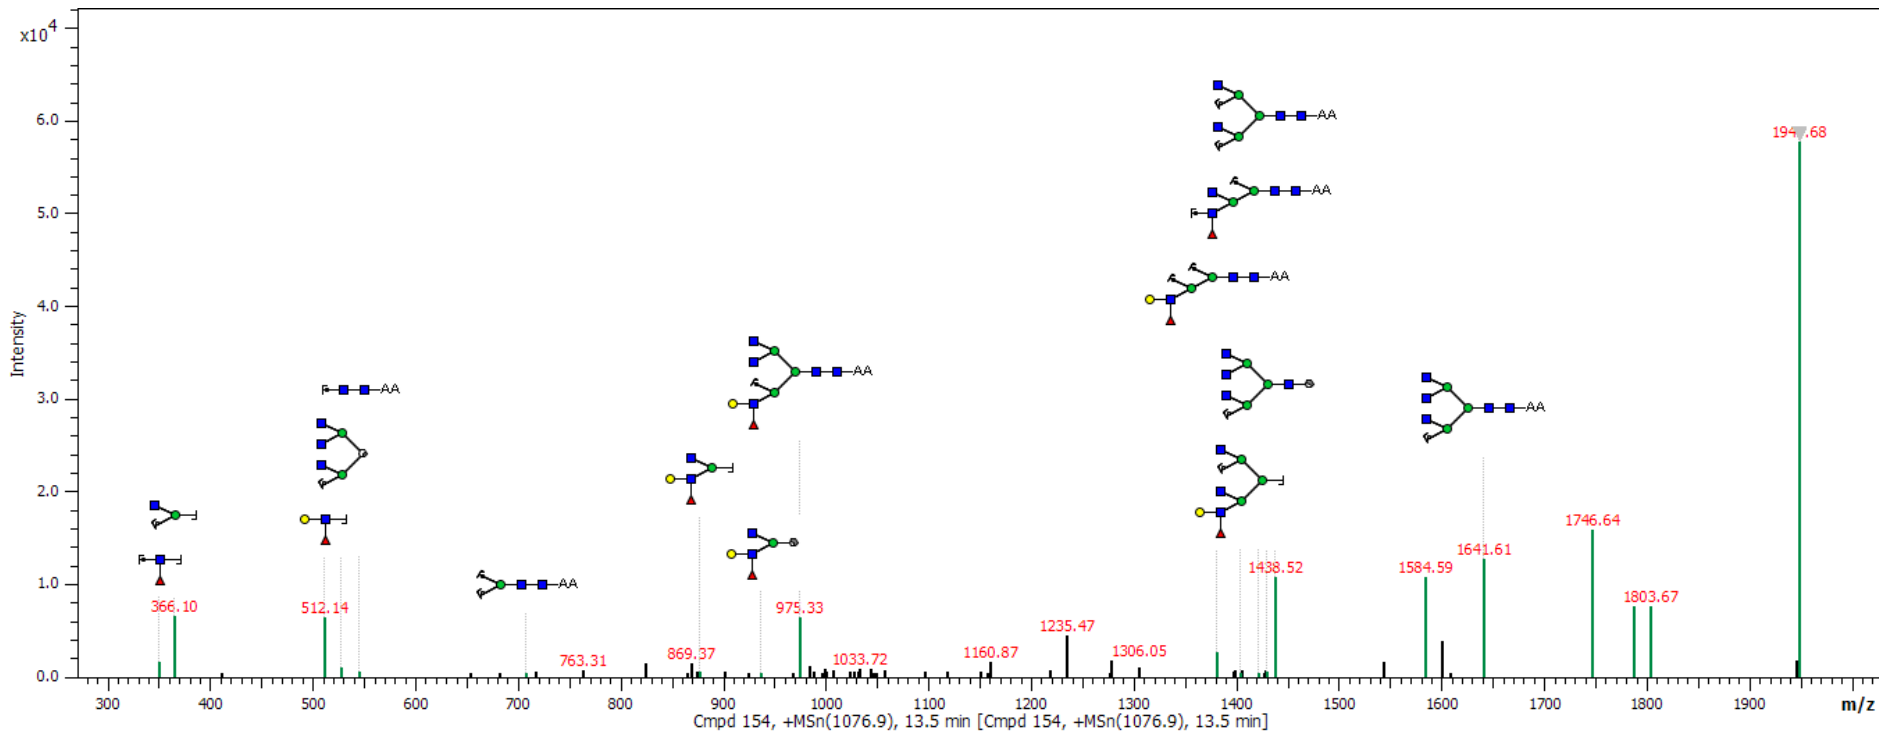

# Spectrum 97

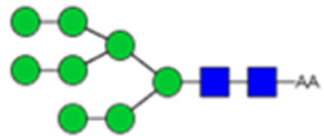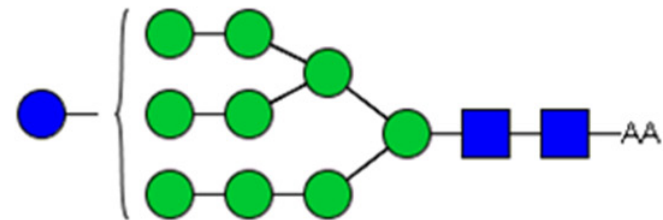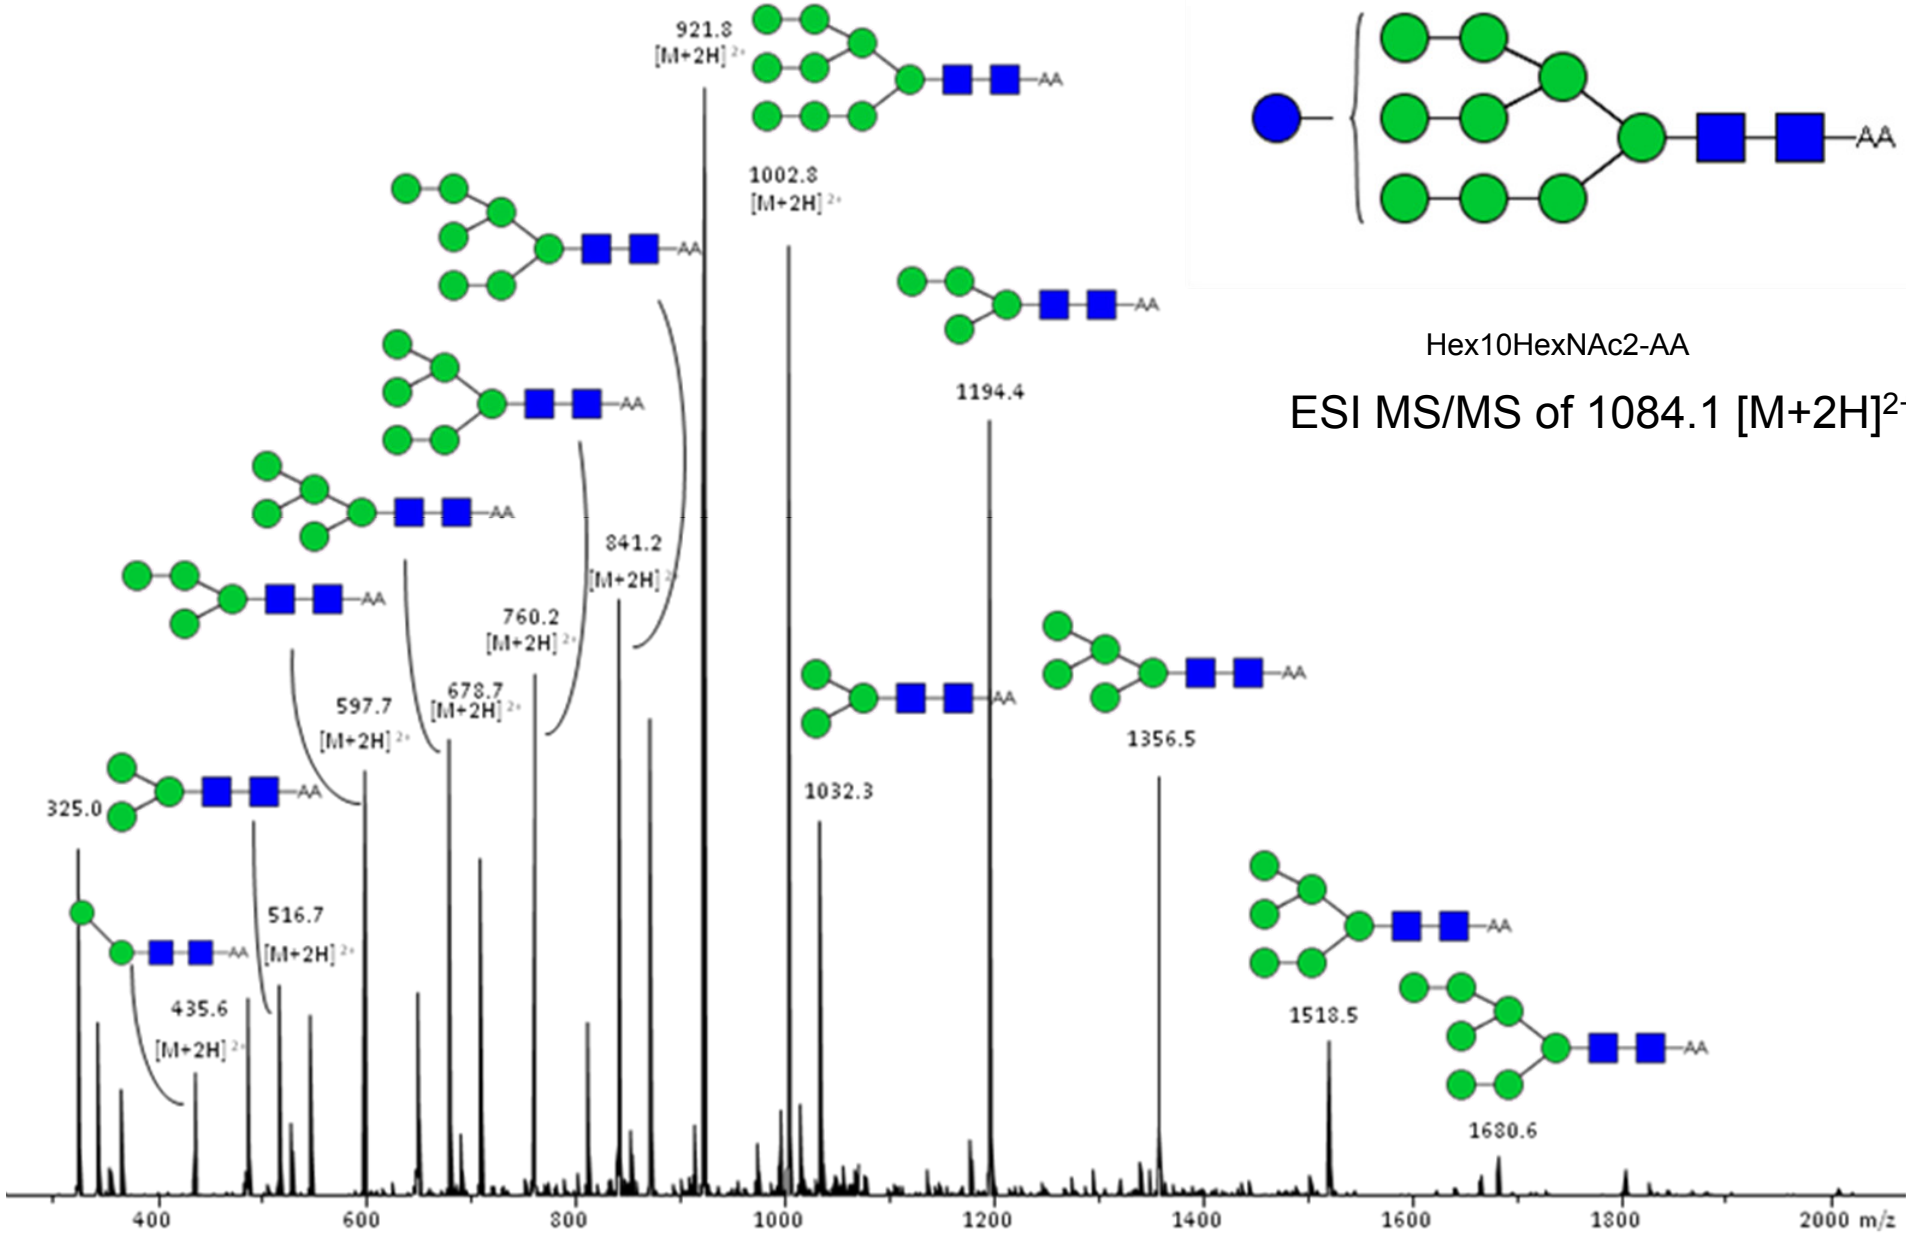

Hex10HexNAc2-AA

ESI MS/MS of 1084.1  $[M+2H]^{2+}$

# Spectrum 98

Lift of 2173.8 [M-H]<sup>-</sup>

S1dHex2Hex4HexNAc5-AA

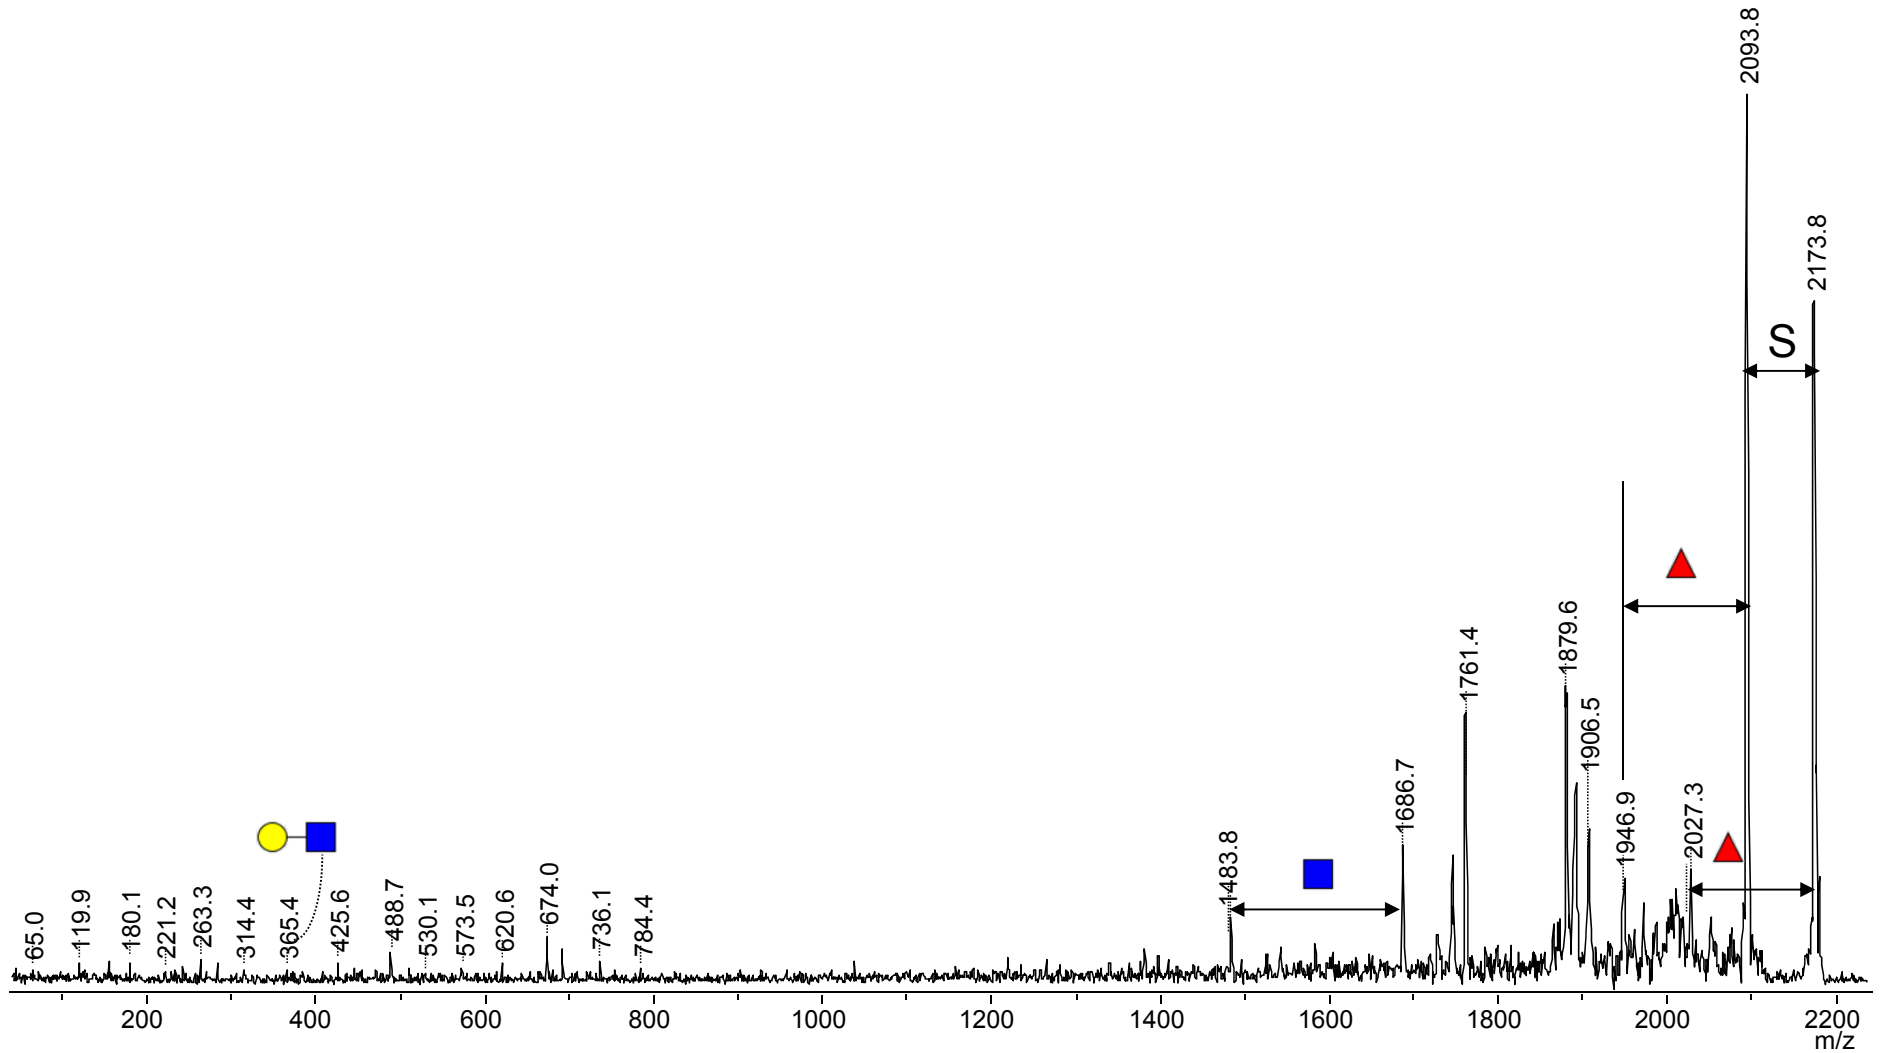

# Spectrum 99



## Glycan Search Report

Glycan: 22

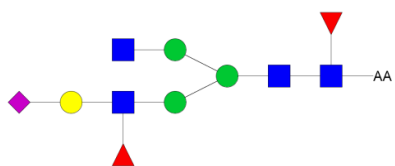

**Project path:** /N-glycans cancer/25143/comp\_25143\_01.mgf

**MS data:** K:/Cancer-CCR/N-glycans raw data\_MS/LC-MS of the discriminators/25143\_01.d/comp\_25143\_01.mgf

**Parent m/z:** 1092.4089 2+ **Score:** 32.026

**Composition:** Hex4HexNAc4NeuAc1dHex2-AA **Intensity coverage [%]:** 0.61

**Accession:** 29191 **Fragment coverage [%]:** 0.17

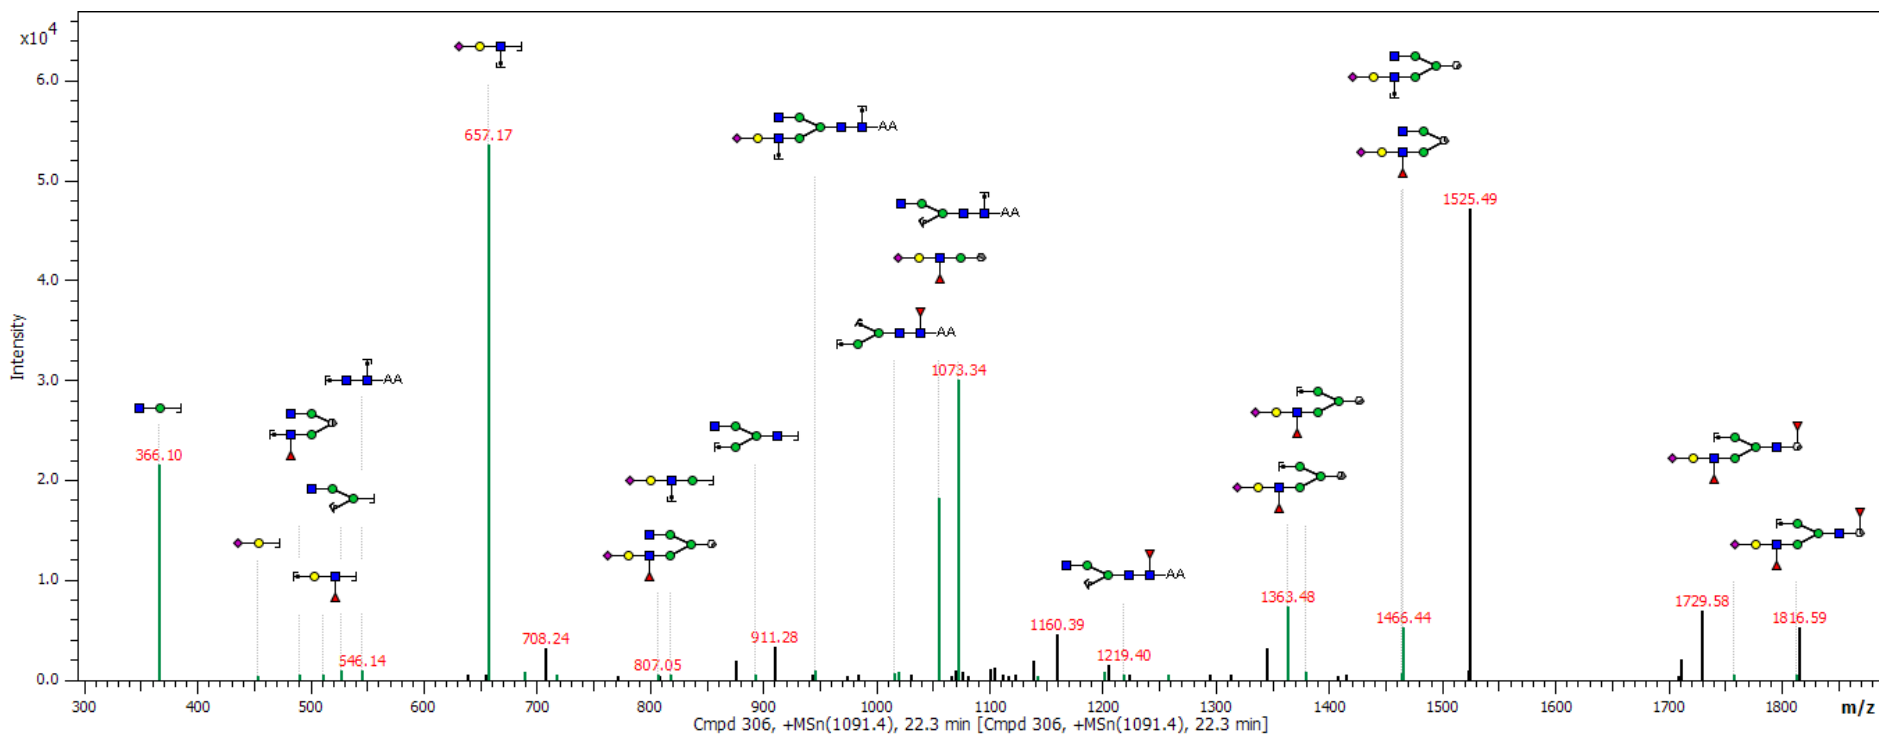



# Spectrum 100

Lift of 2189.8 [M-H]<sup>-</sup>  
S1dHex1Hex5HexNAc5-AA

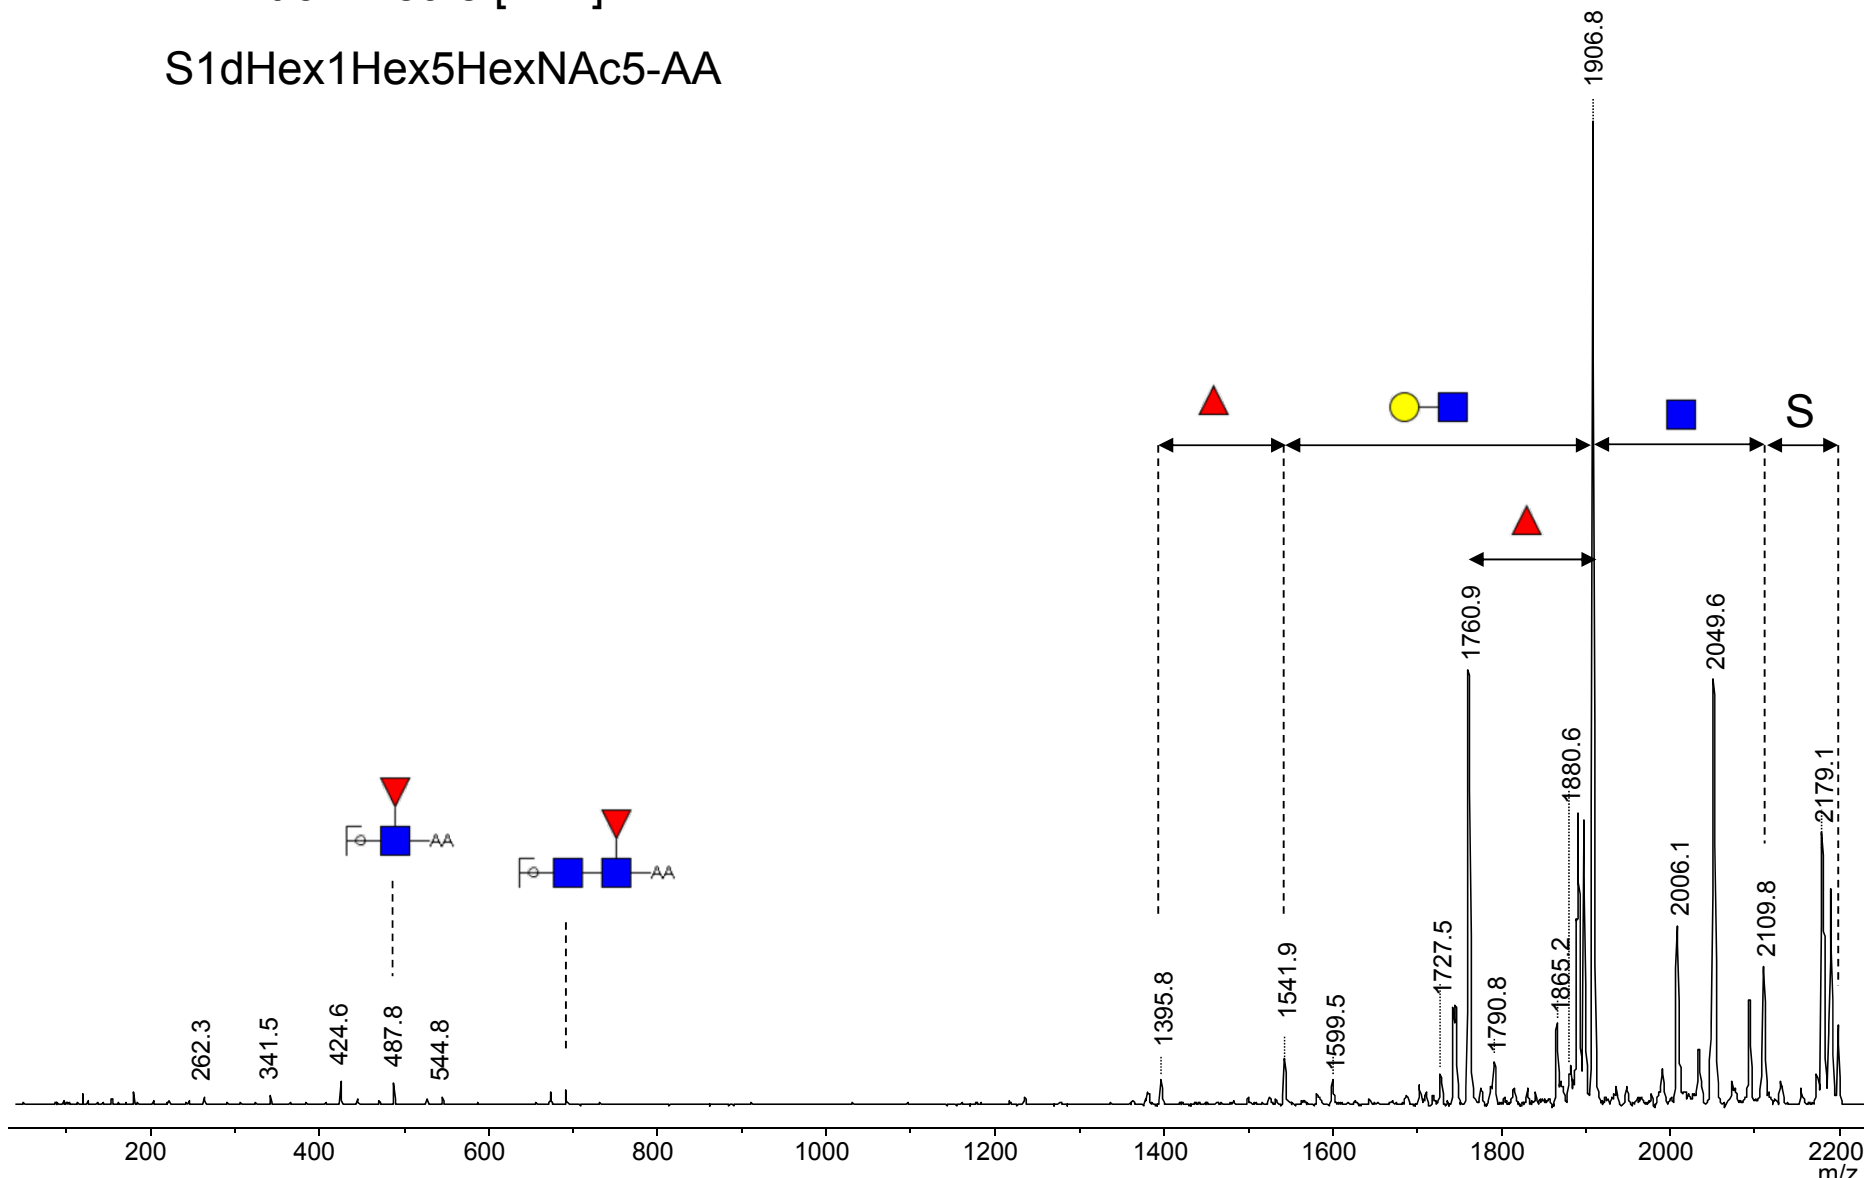



## Glycan Search Report

Glycan: 15

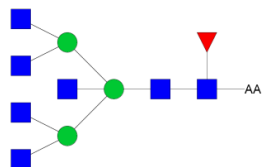

|                      |                                                                                           |                                |        |
|----------------------|-------------------------------------------------------------------------------------------|--------------------------------|--------|
| <b>Project path:</b> | /N-glycans cancer/25145/comp_25145.mgf                                                    |                                |        |
| <b>MS data:</b>      | K:/Cancer-CCR/N-glycans raw data_MS/LC-MS of the discriminators/25145_02.d/comp_25145.mgf |                                |        |
| <b>Parent m/z:</b>   | 1097.4250 2+                                                                              | <b>Score:</b>                  | 47.190 |
| <b>Composition:</b>  | Hex3HexNAc7dHex1-AA                                                                       | <b>Intensity coverage [%]:</b> | 0.74   |
| <b>Accession:</b>    | 3033                                                                                      | <b>Fragment coverage [%]:</b>  | 0.30   |

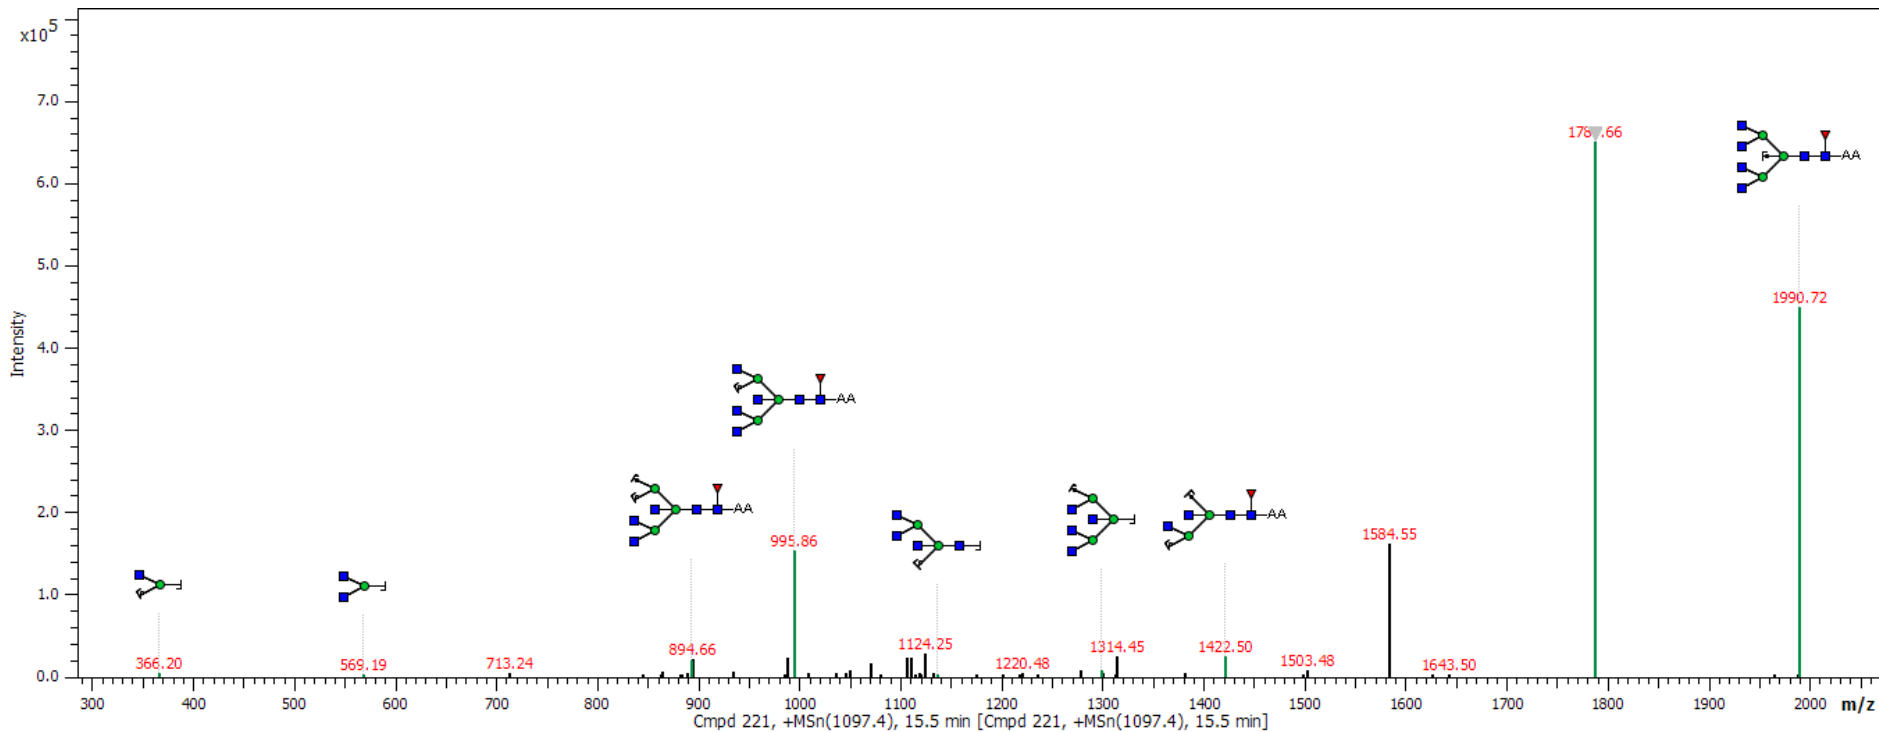

# Spectrum 102



## Glycan Search Report

Glycan: 18

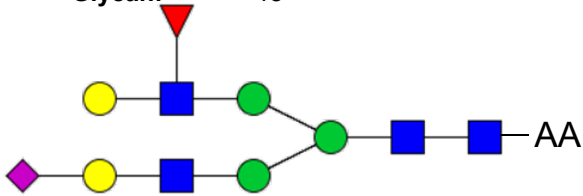

**Project path:** /N-glycans cancer/25148/comp\_25148.mgf  
**MS data:** K:/Cancer-CCR/N-glycans raw data\_MS/LC-MS of the discriminators/25148\_02.d/comp\_25148.mgf  
**Parent m/z:** 1100.4064 2+ **Score:** 57.543  
**Composition:** Hex5HexNAc4NeuAc1dHex1-AA **Intensity coverage [%]:** 0.75  
**Accession:** **Fragment coverage [%]:** 0.44

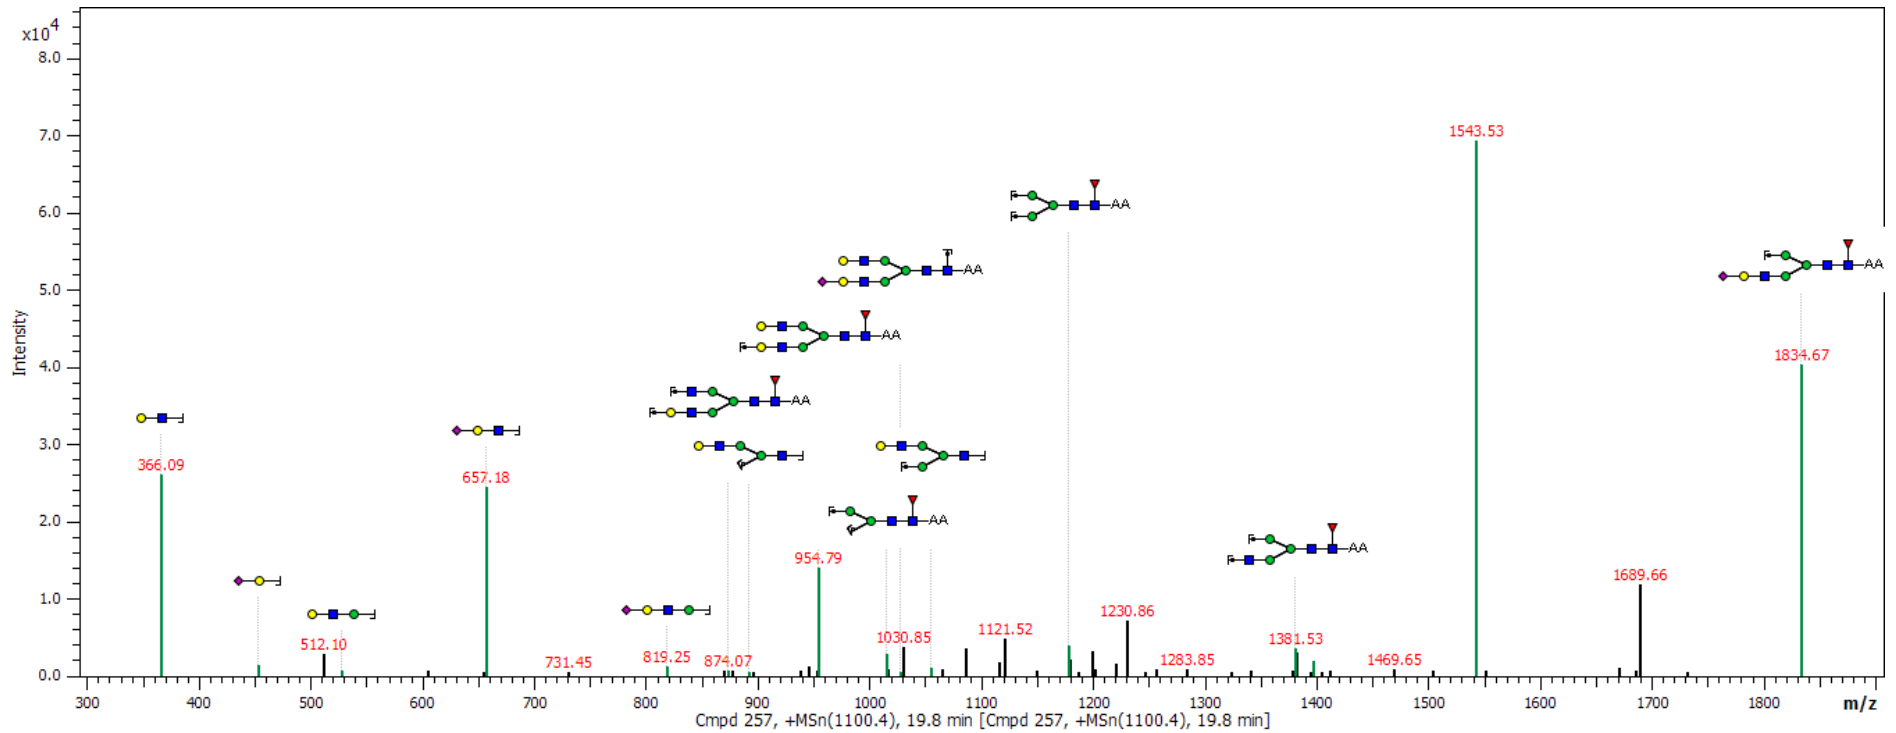



# Spectrum 103

## Glycan Search Report

Glycan: 3

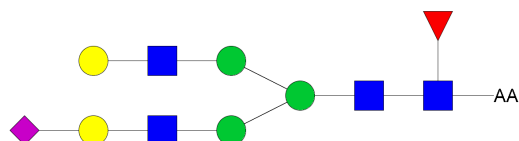

**Project path:** /N-glycans cancer/Lift spectra/CombinedLIFT  
**MS data:** c:/documents and settings/ciabalog/desktop/new folder/lift of 2197.7\_fraction64/0\_c5/1/2197.6000.lift/ 1sref/pdata/1/1r  
**Parent m/z:** 2197.7909 -1      **Score:** 63.053  
**Composition:** Hex5HexNAc4NeuAc1dHex1-AA      **Intensity coverage [%]:** 0.78  
**Accession:** 36273      **Fragment coverage [%]:** 0.51

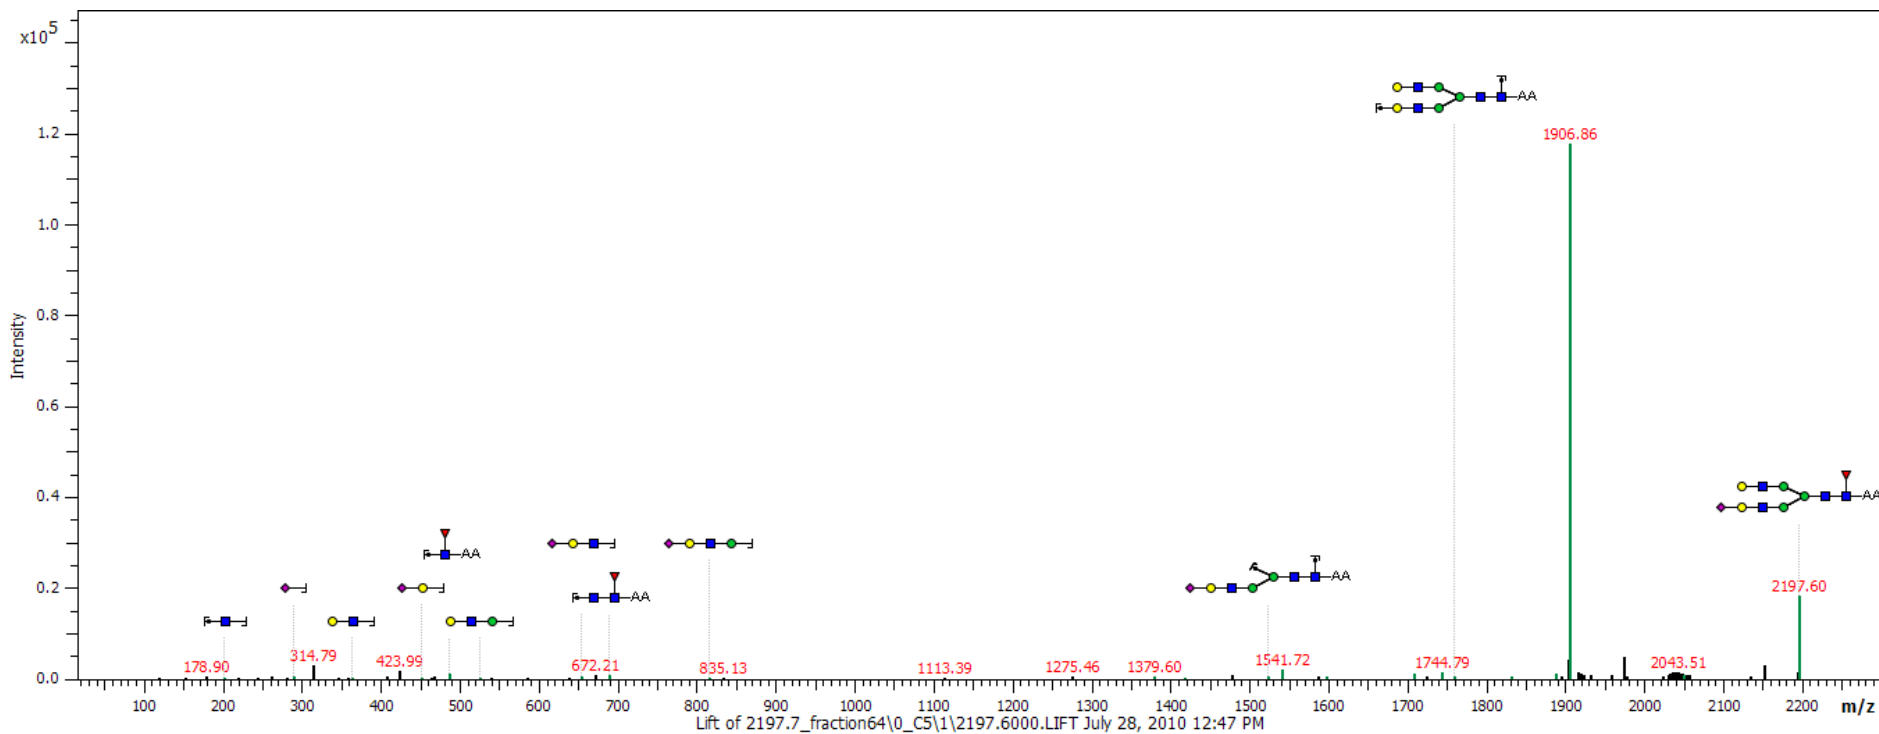

# Spectrum 104



## Glycan Search Report

Glycan: 2



**Project path:** /N-glycans cancer/25147/comp\_25147.mgf  
**MS data:** K:/Cancer-CCR/N-glycans raw data\_MS/LC-MS of the discriminators/25147\_02.d/comp\_25147.mgf  
**Parent m/z:** 1100.4064 2+ **Score:** 76.225  
**Composition:** Hex5HexNAc4NeuAc1dHex1-AA **Intensity coverage [%]:** 0.96  
**Accession:** 36273 **Fragment coverage [%]:** 0.61

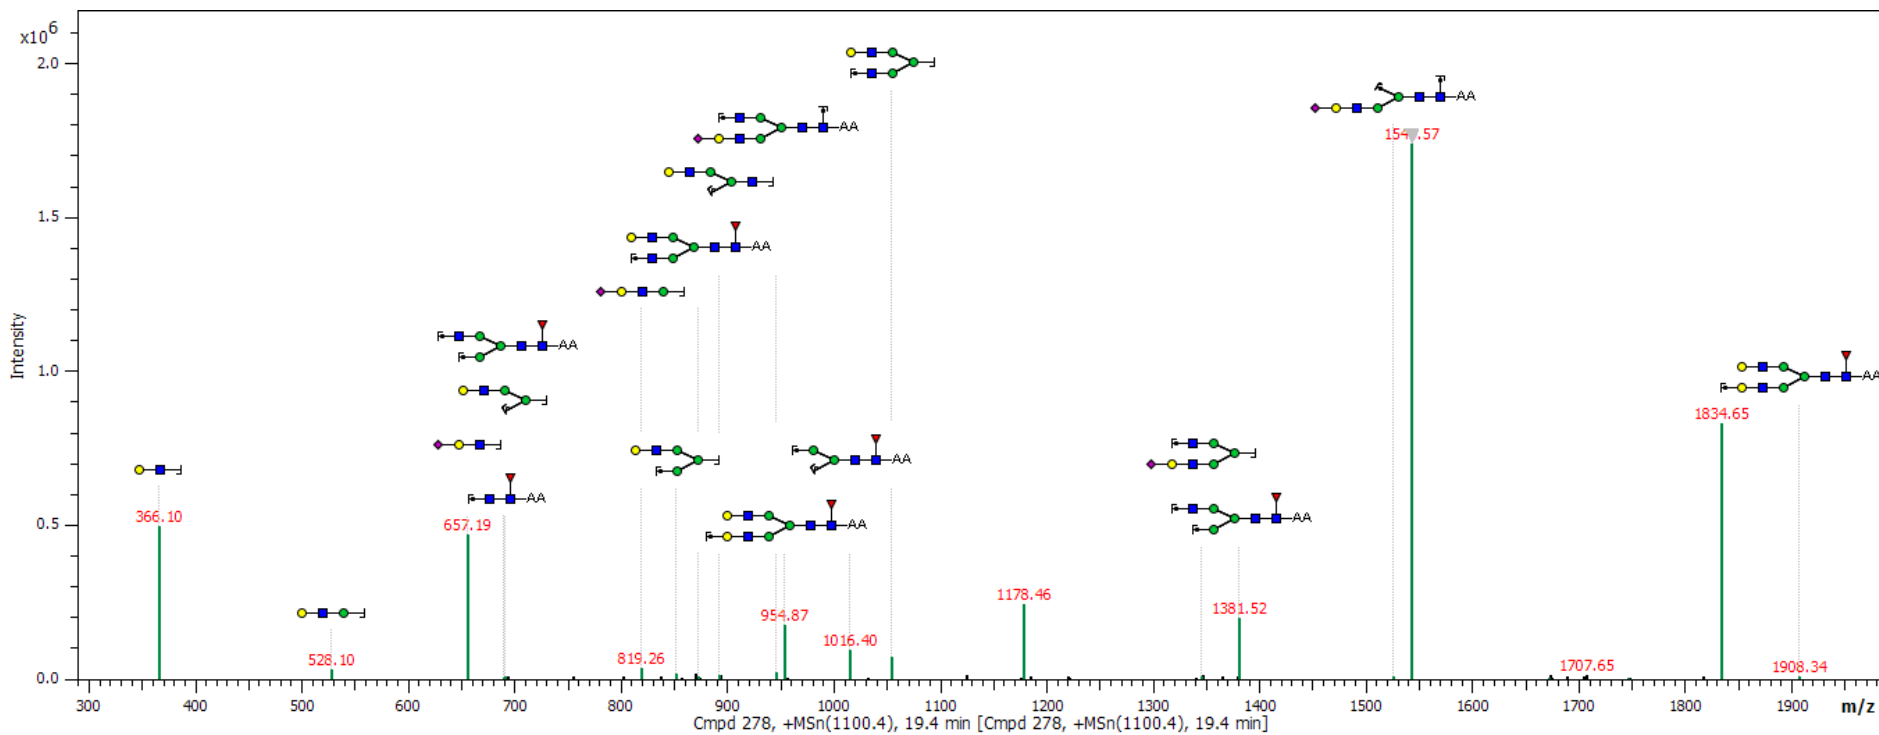

# Spectrum 105



## Glycan Search Report

Glycan: 5

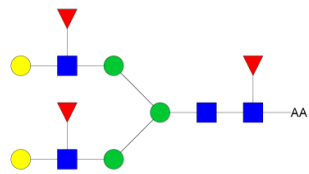

**Project path:** /N-glycans cancer/Lift spectra/CombinedLIFT

**MS data:** c:/documents and settings/ciabalog/desktop/new folder/lift of 2198.7\_fraction68/0\_c9/1/2198.7000.lift/1sref/pdata/1/1r

**Parent m/z:** 2198.8113 -1

**Score:** 60.225

**Composition:** Hex5HexNAc4dHex3-AA

**Intensity coverage [%]:** 0.63

**Accession:** 36245

**Fragment coverage [%]:** 0.58

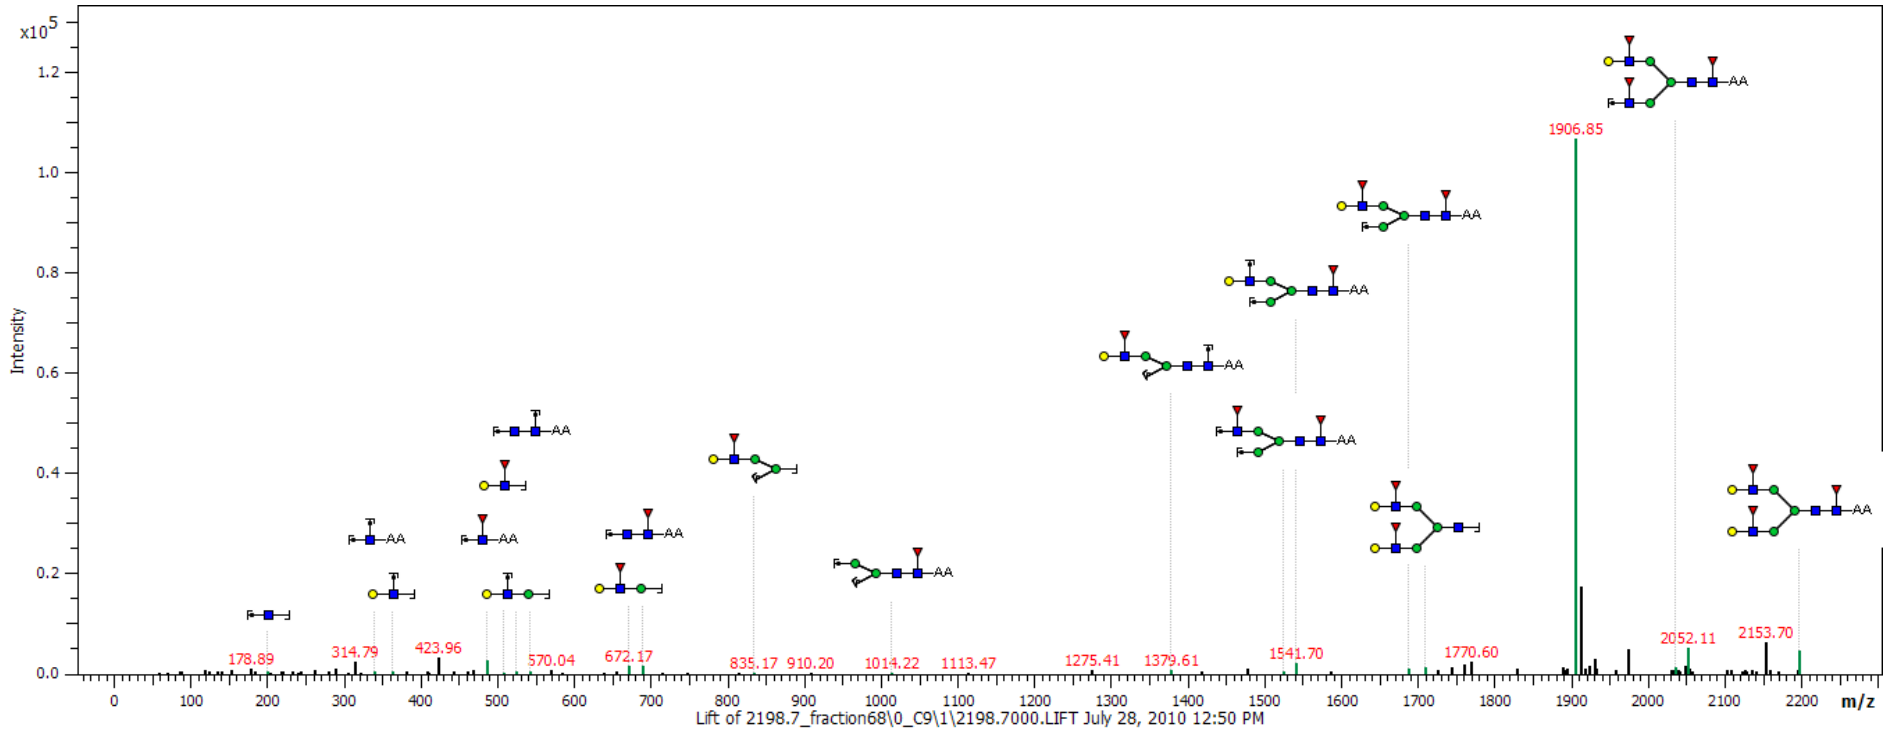

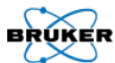

## Glycan Search Report

Glycan: 12

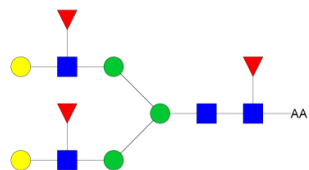

**Project path:** /N-glycans cancer/25148/comp\_25148.mgf  
**MS data:** K:/Cancer-CCR/N-glycans raw data\_MS/LC-MS of the discriminators/25148\_02.d/comp\_25148.mgf  
**Parent m/z:** 1100.9166 2+ **Score:** 69.786  
**Composition:** Hex5HexNAc4dHex3-AA **Intensity coverage [%]:** 0.68  
**Accession:** 36245 **Fragment coverage [%]:** 0.71

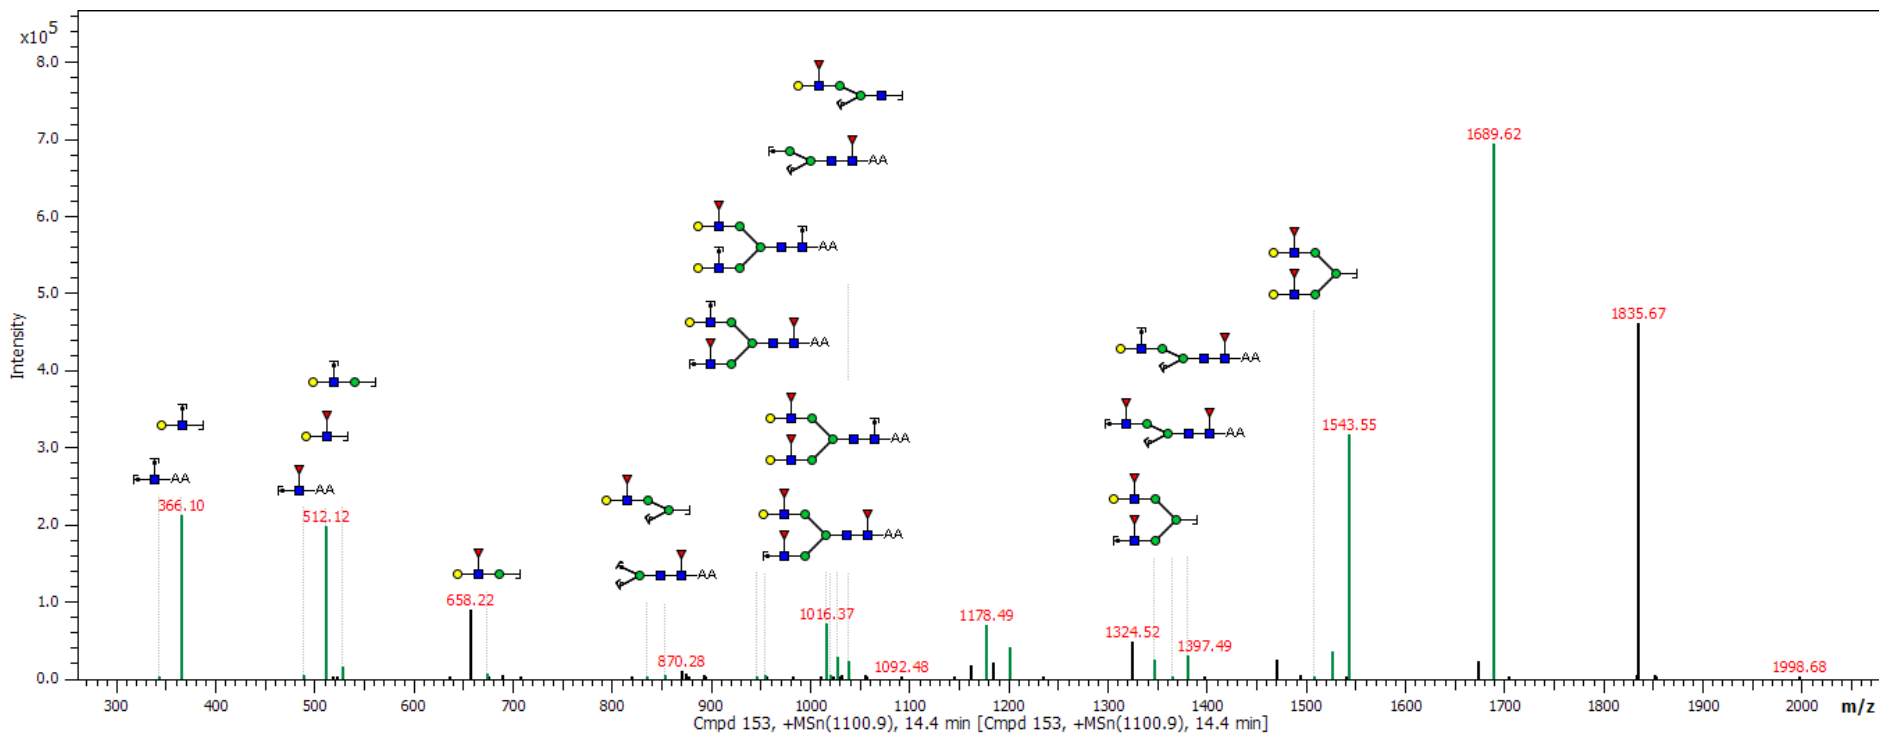

Spectrum 104

MS/MS 1100.4 [M+2H]<sup>2+</sup>

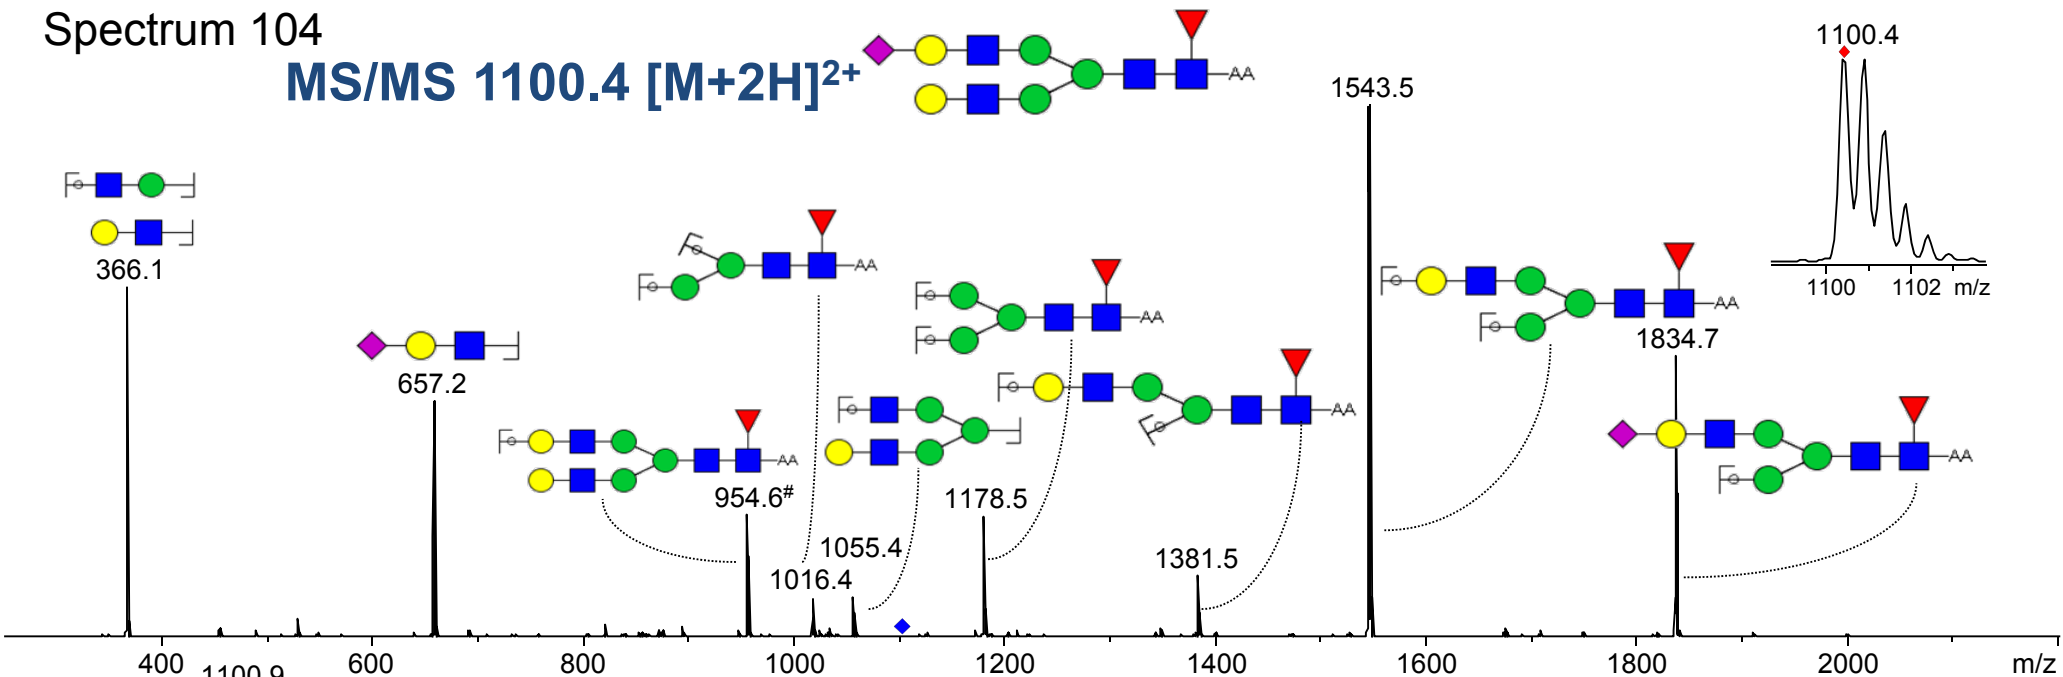

MS/MS 1100.9 [M+2H]<sup>2+</sup>

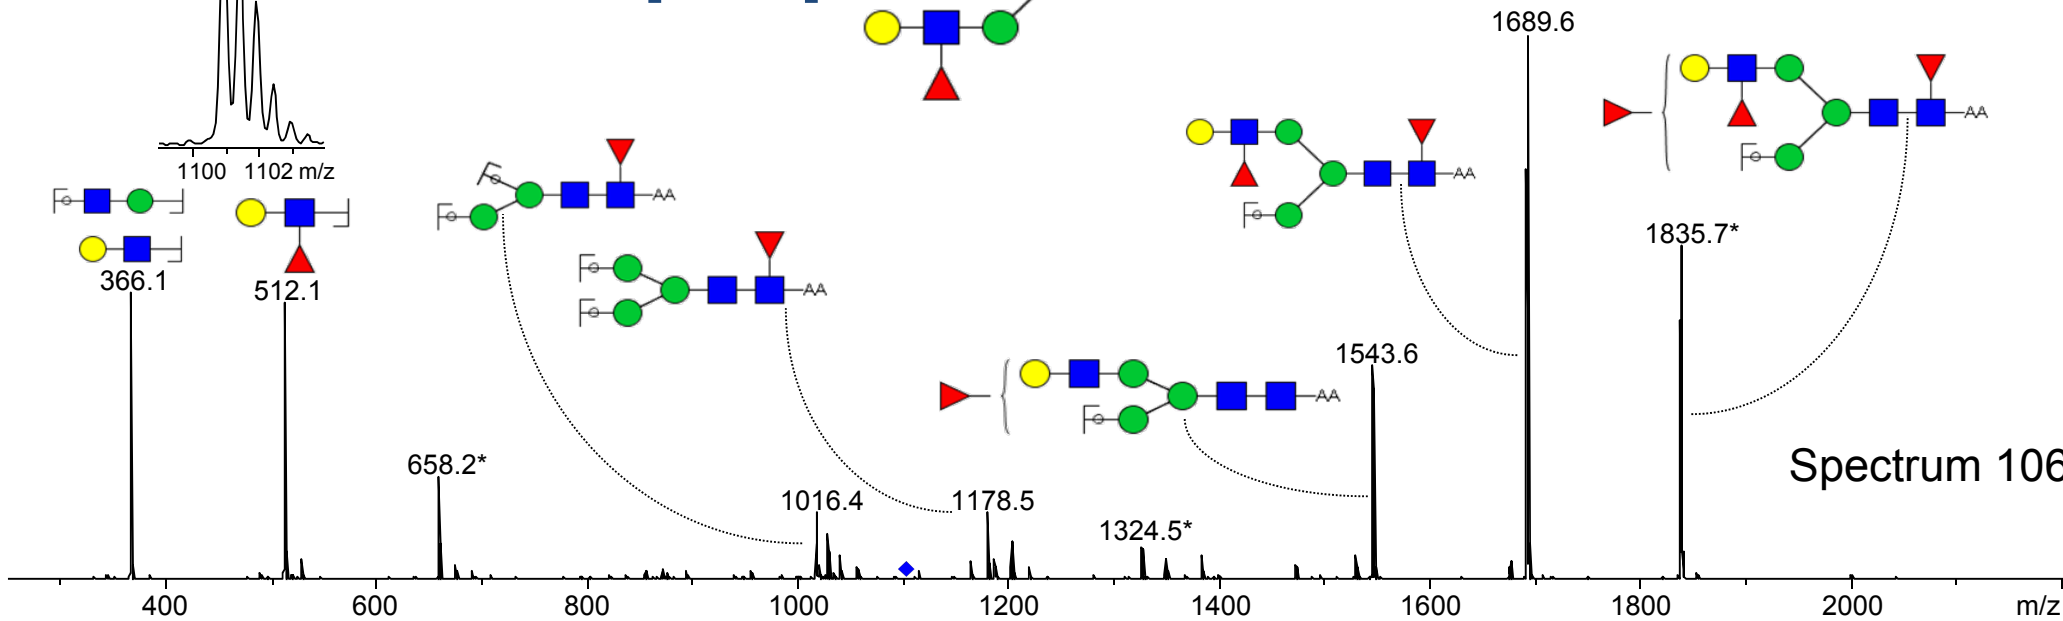

Spectrum 106





# Spectrum 107

## Glycan Search Report

Glycan: 3

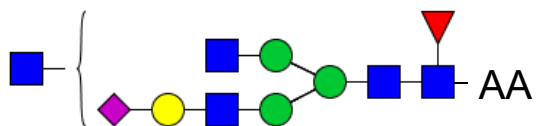

**Project path:** /N-glycans cancer/25147/comp\_25147.mgf  
**MS data:** K:/Cancer-CCR/N-glycans raw data\_MS/LC-MS of the discriminators/25147\_02.d/comp\_25147.mgf  
**Parent m/z:** 1120.9197 2+ **Score:** 71.202  
**Composition:** Hex4HexNAc5NeuAc1dHex1-AA **Intensity coverage [%]:** 0.74  
**Accession:** 36229 **Fragment coverage [%]:** 0.68

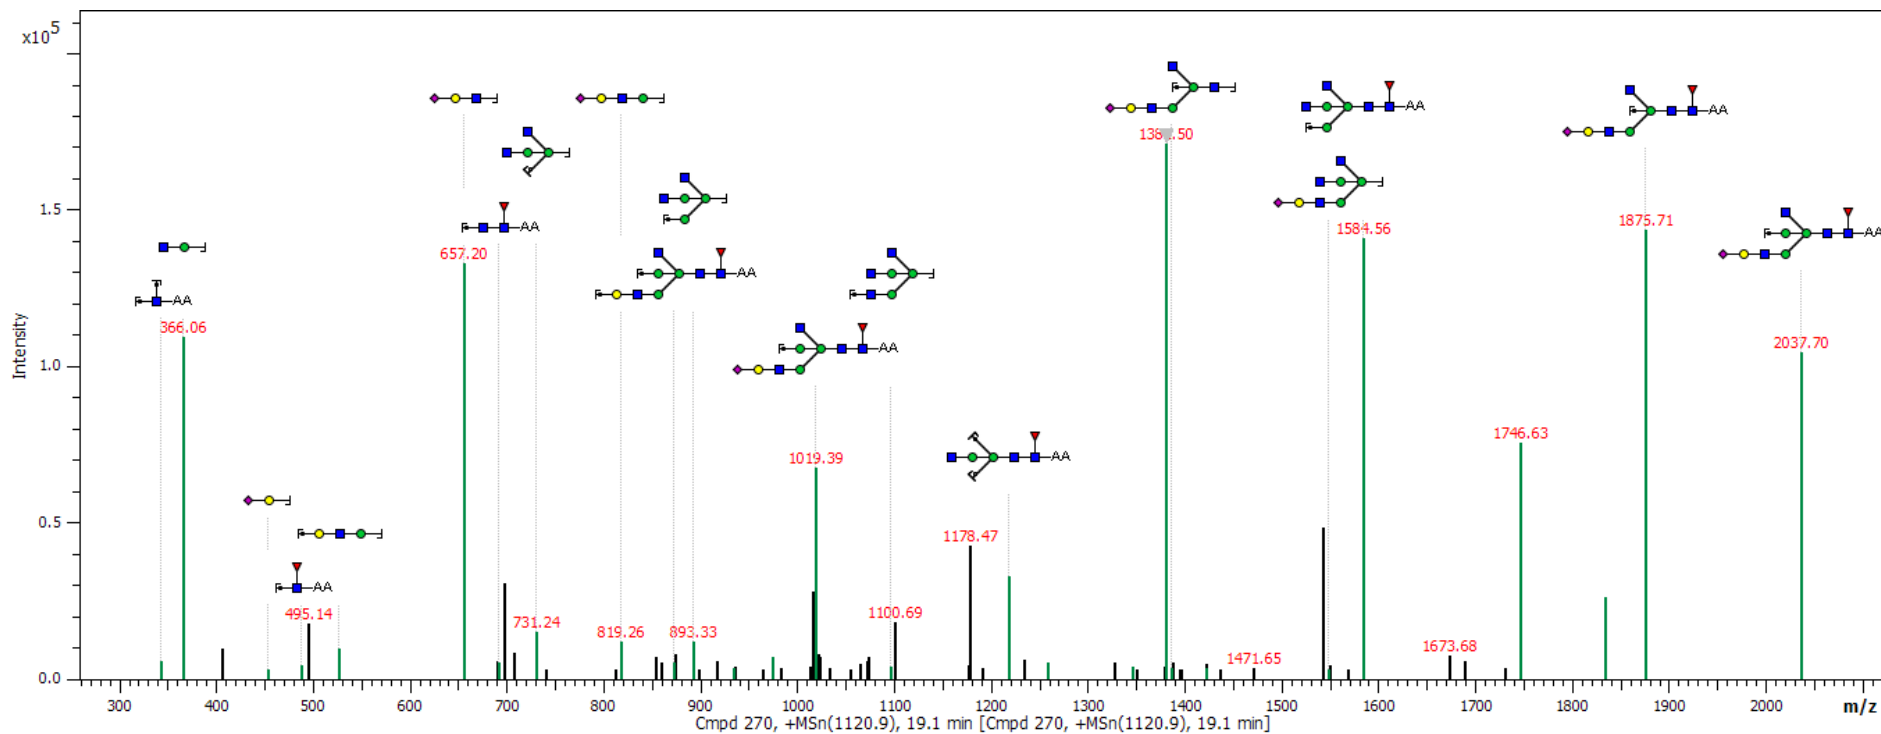

Glycan: 39

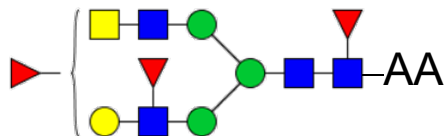

**Project path:** /N-glycans cancer/25148/comp\_25148.mgf  
**MS data:** K:/Cancer-CCR/N-glycans raw data\_MS/LC-MS of the discriminators/25148\_02.d/comp\_25148.mgf  
**Parent m/z:** 1121.4299 2+ **Score:** 33.906  
**Composition:** Hex4HexNAc5dHex3-AA **Intensity coverage [%]:** 0.57  
**Accession:** 35814 **Fragment coverage [%]:** 0.20

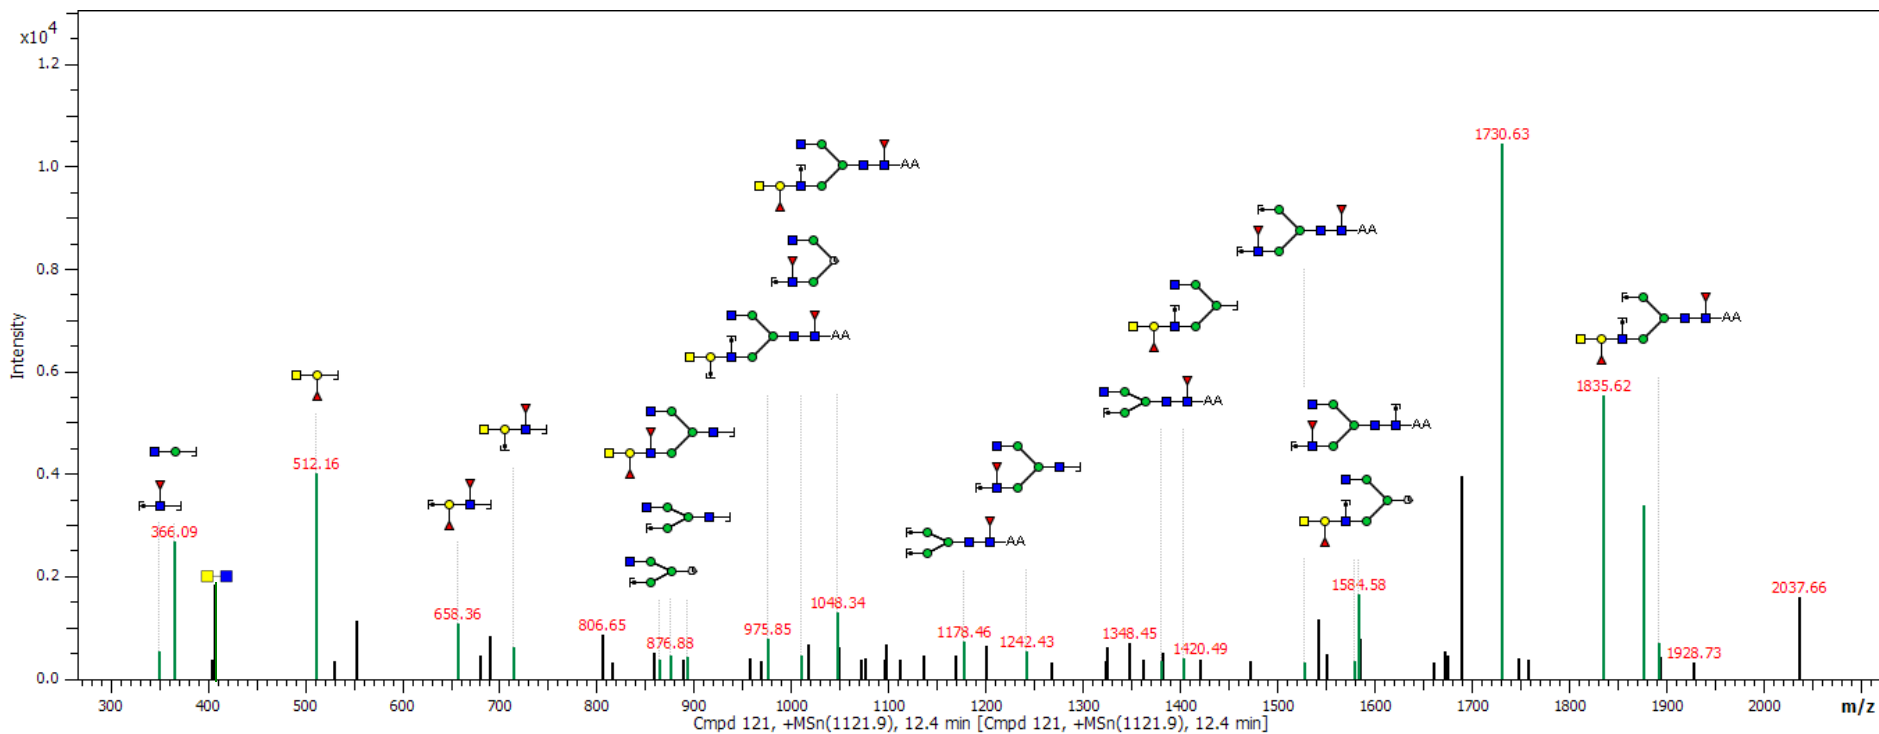



# Spectrum 109

## Glycan Search Report

Glycan: 25

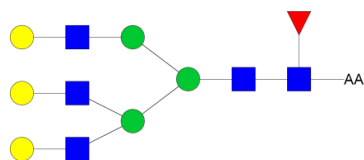

**Project path:** /N-glycans cancer/25148/comp\_25148.mgf  
**MS data:** K:/Cancer-CCR/N-glycans raw data\_MS/LC-MS of the discriminators/25148\_02.d/comp\_25148.mgf  
**Parent m/z:** 758.6189 3+ **Score:** 52.446  
**Composition:** Hex6HexNAc5dHex1-AA **Intensity coverage [%]:** 0.76  
**Accession:** 36108 **Fragment coverage [%]:** 0.36

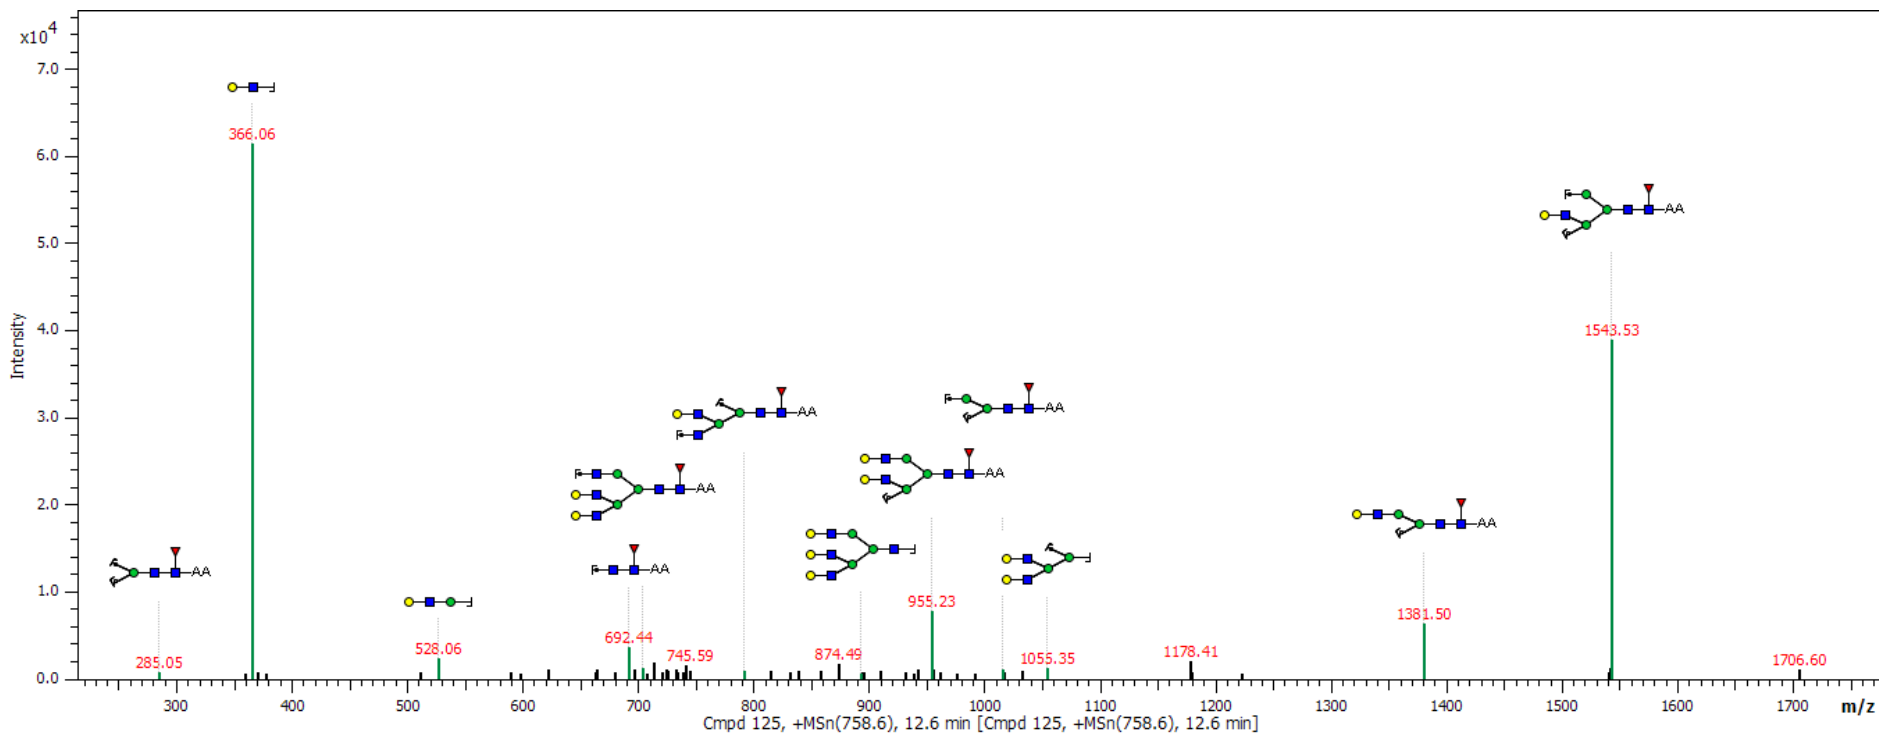

Spectrum 110

Lift of 2335.6 [M-H]<sup>-</sup>  
SdHex2Hex5HexNAc5-AA

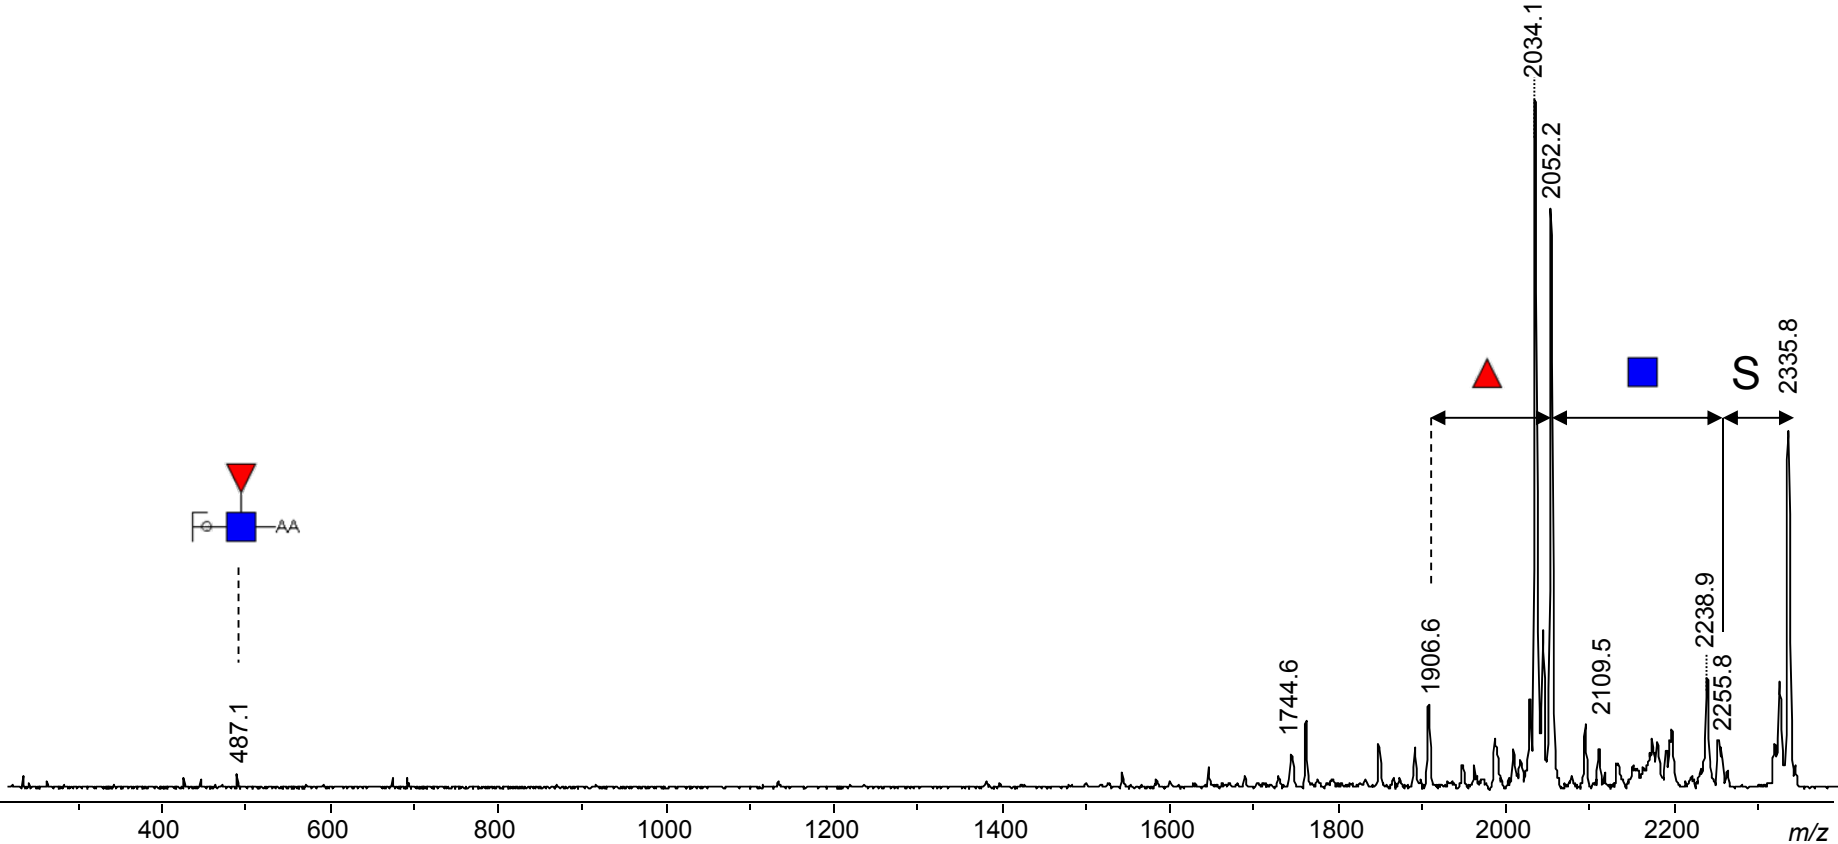



# Spectrum 111

## Glycan Search Report

Glycan: 2

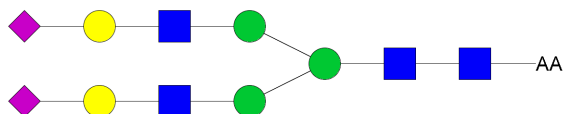

Project path: /N-glycans cancer/25148/comp\_25148.mgf

MS data: K:/Cancer-CCR/N-glycans raw data\_MS/LC-MS of the discriminators/25148\_02.d/comp\_25148.mgf

Parent m/z: 782.2858 3+

Score: 79.524

Composition: Hex5HexNAc4NeuAc2-AA

Intensity coverage [%]: 0.80

Accession: 32146

Fragment coverage [%]: 0.79

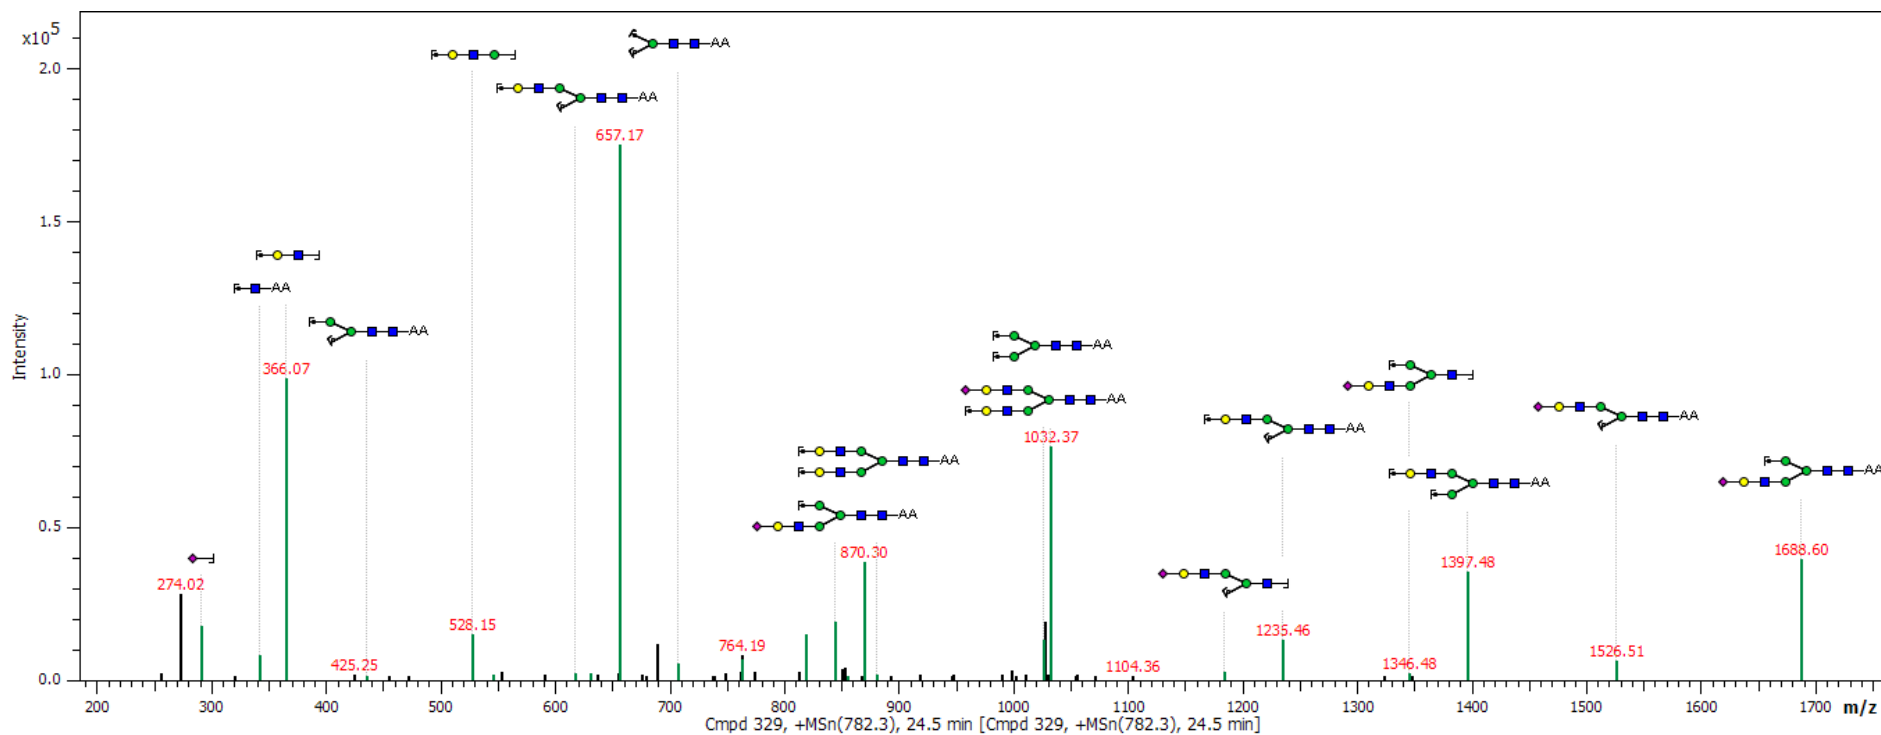

# Spectrum 112



## Glycan Search Report

Glycan: 5

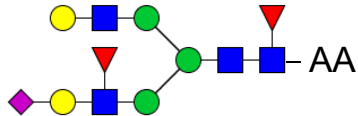

**Project path:** /N-glycans cancer/25148/comp\_25148.mgf  
**MS data:** K:/Cancer-CCR/N-glycans raw data\_MS/LC-MS of the discriminators/25148\_02.d/comp\_25148.mgf  
**Parent m/z:** 782.6260 3+ **Score:** 75.526  
**Composition:** Hex5HexNAc4NeuAc1dHex2-AA **Intensity coverage [%]:** 0.78  
**Accession:** **Fragment coverage [%]:** 0.73

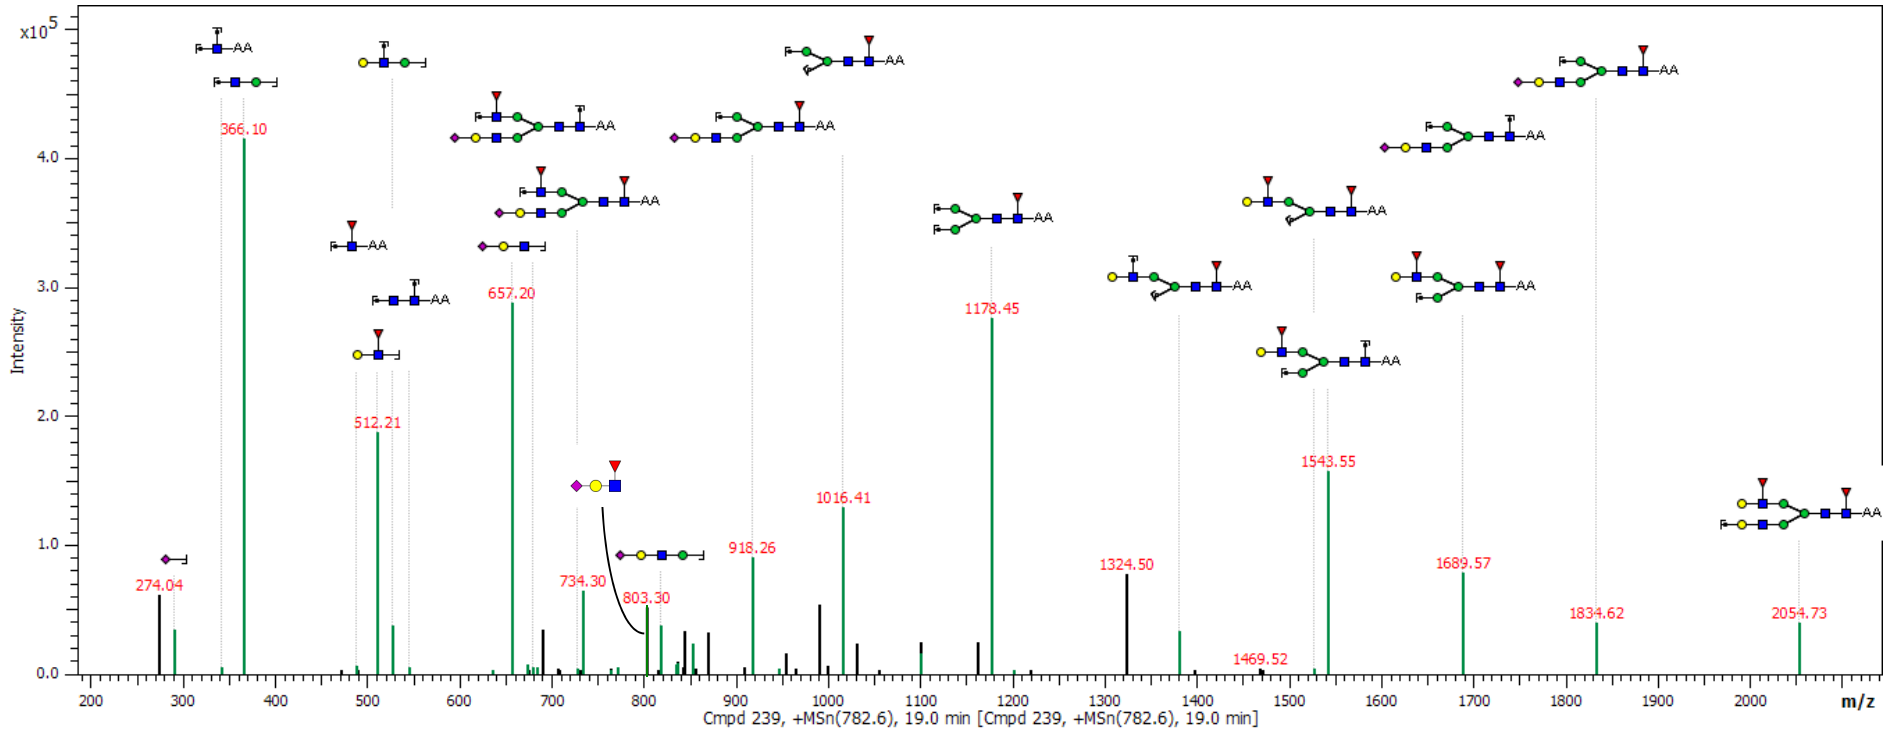

# Spectrum 113



## Glycan Search Report

Glycan: 27

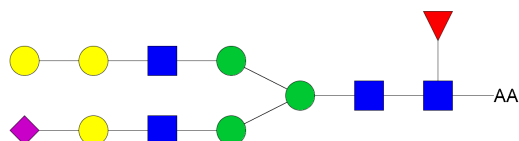

**Project path:** /N-glycans cancer/25148/comp\_25148.mgf  
**MS data:** K:/Cancer-CCR/N-glycans raw data\_MS/LC-MS of the discriminators/25148\_02.d/comp\_25148.mgf  
**Parent m/z:** 1181.4328 2+ **Score:** 49.693  
**Composition:** Hex6HexNAc4NeuAc1dHex1-AA **Intensity coverage [%]:** 0.56  
**Accession:** 36289 **Fragment coverage [%]:** 0.44

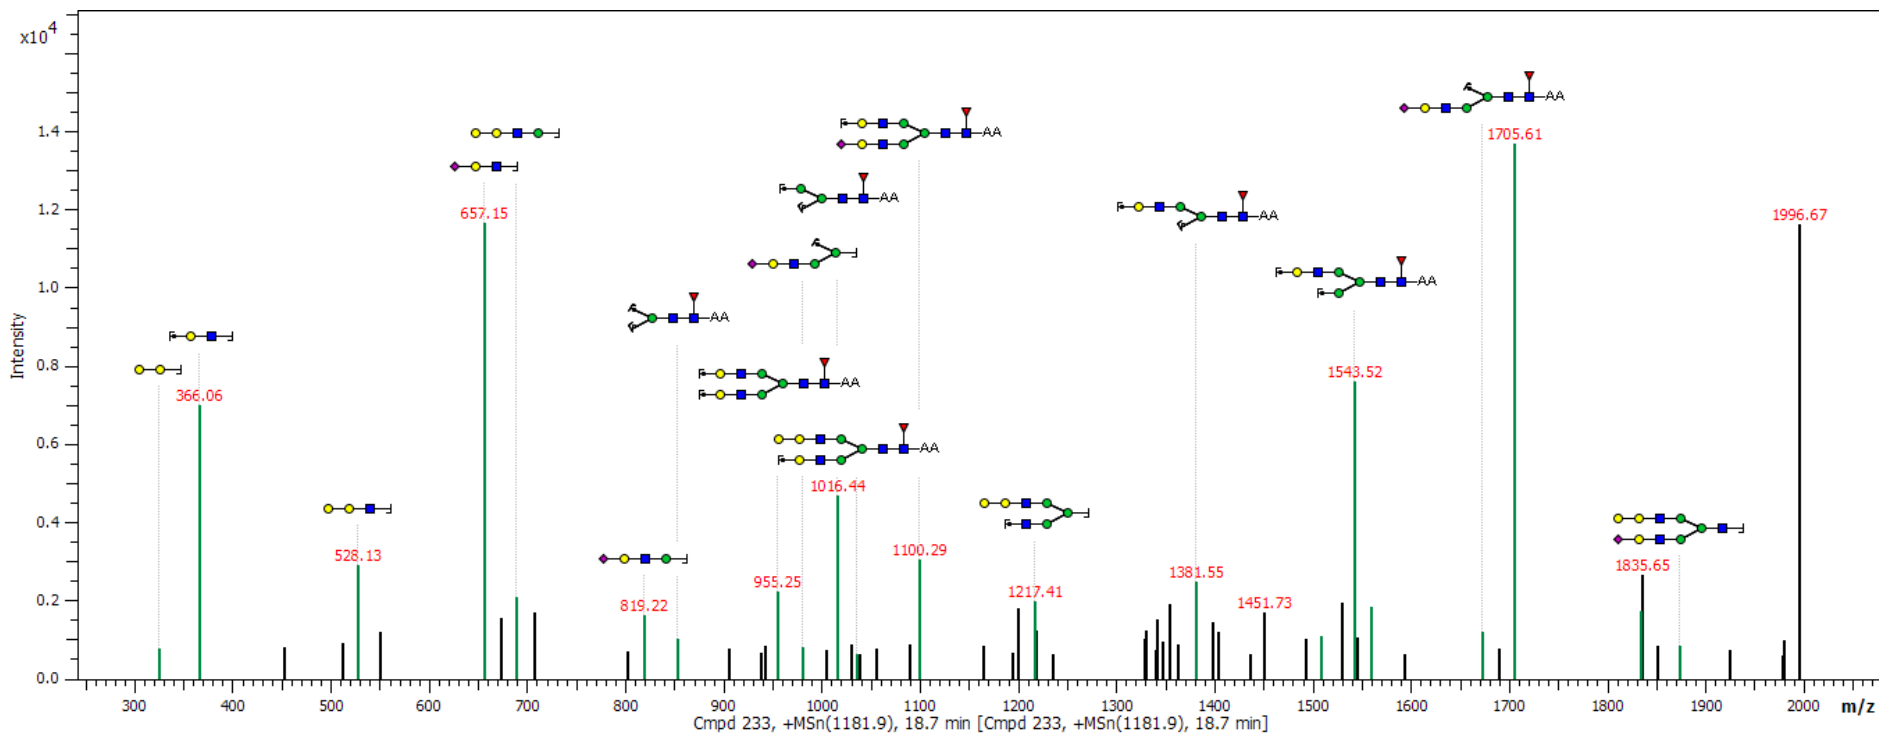

# Spectrum 114

LIFT of 2360.9  
dHex3Hex6HexNAc4-AA

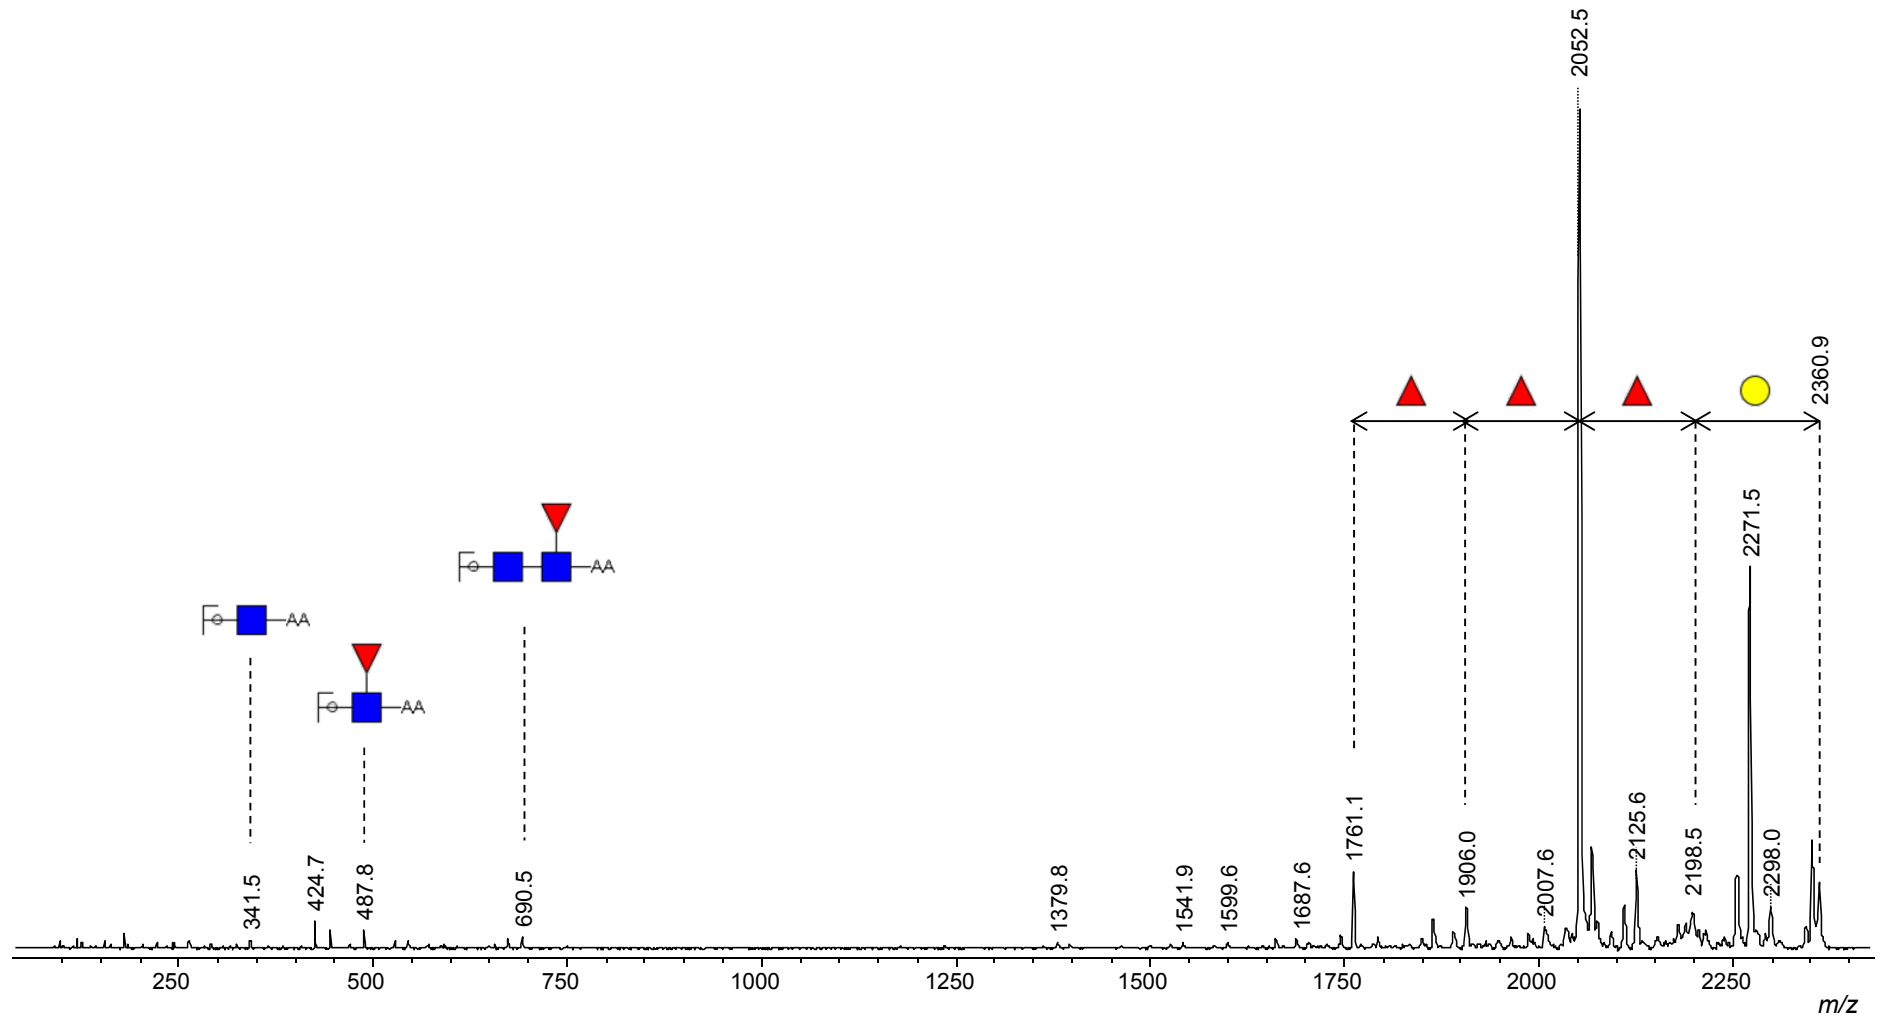



# Spectrum 115

LIFT of 2392.95

S1dHex1Hex5HexNAc6-AA

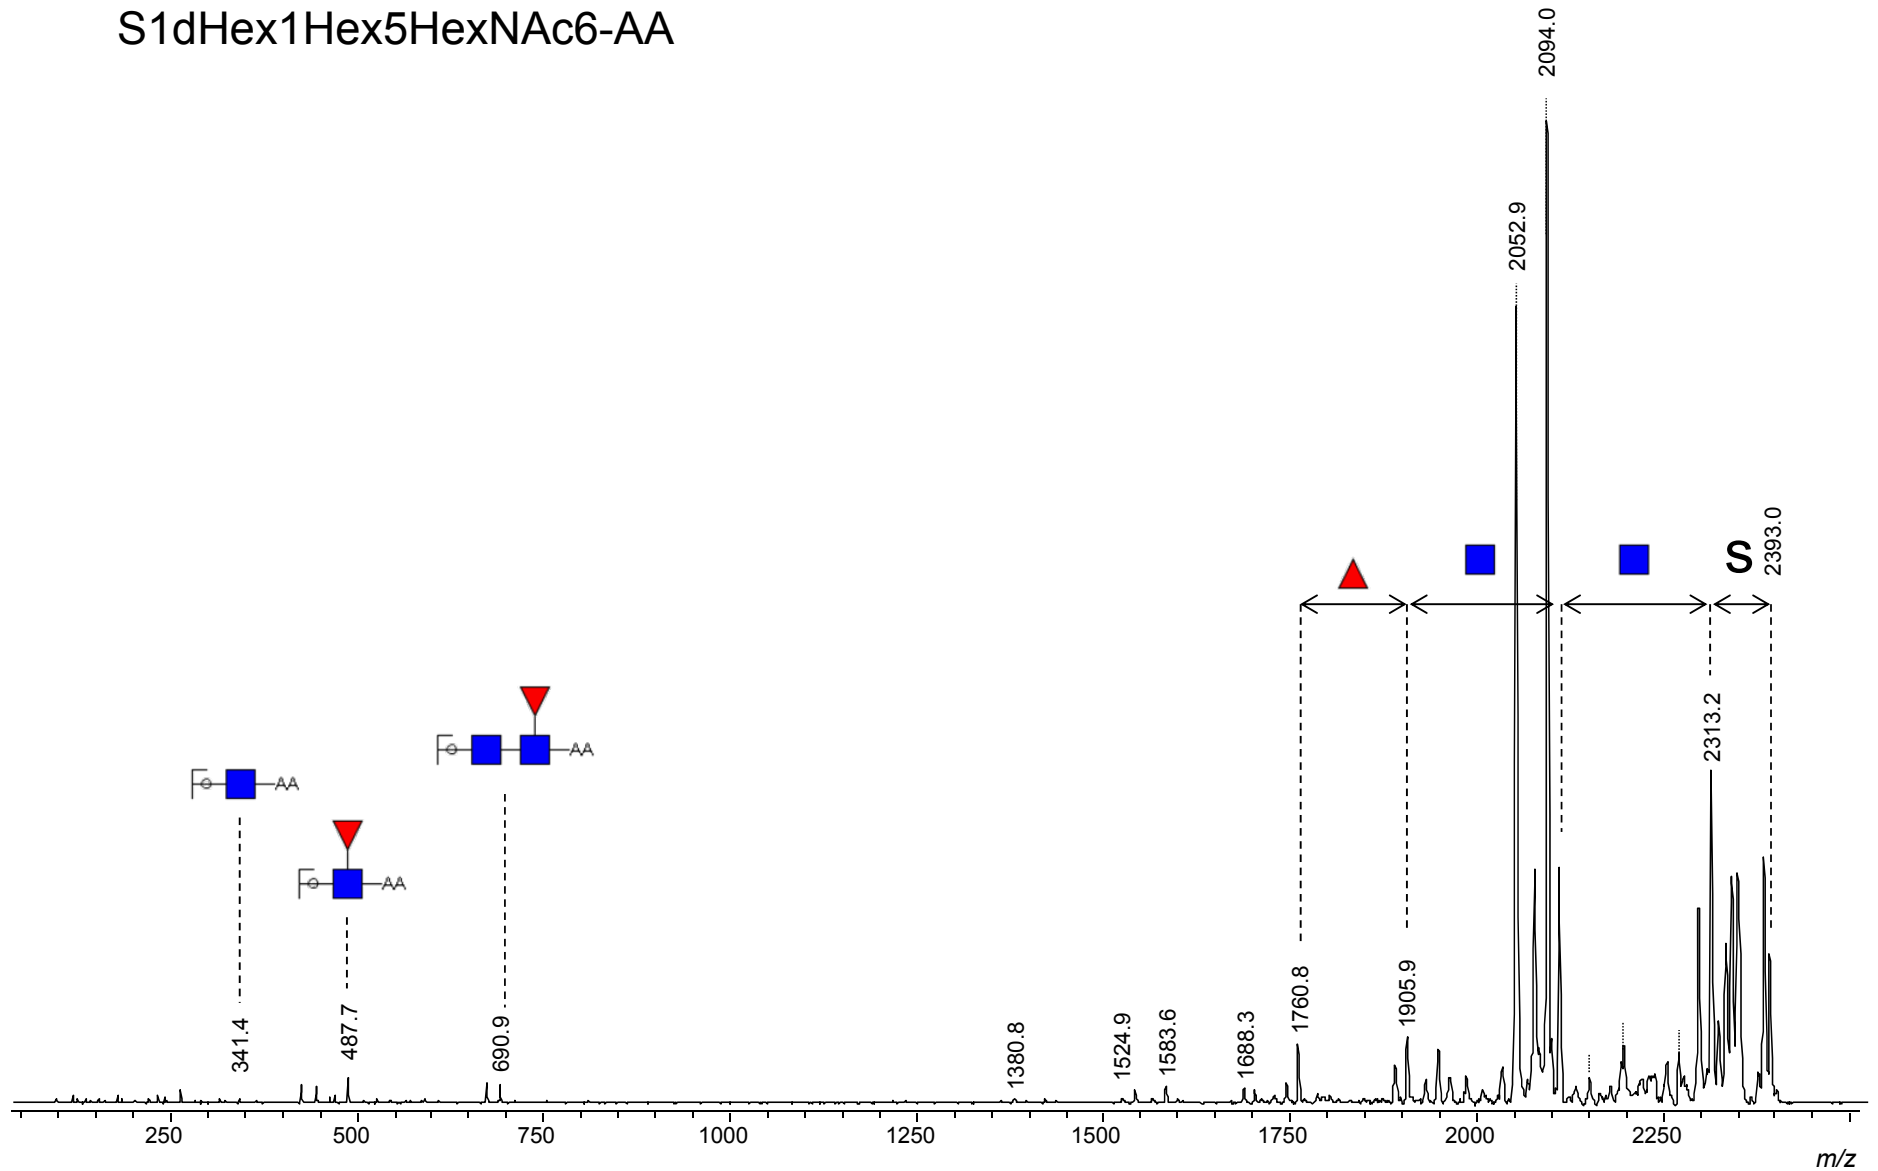

# Spectrum 116



## Glycan Search Report

Glycan: 31

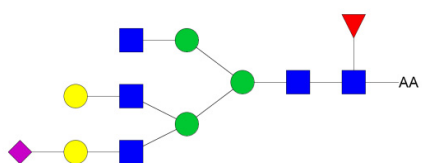

**Project path:** /N-glycans cancer/25148/comp\_25148.mgf  
**MS data:** K:/Cancer-CCR/N-glycans raw data\_MS/LC-MS of the discriminators/25148\_02.d/comp\_25148.mgf  
**Parent m/z:** 801.6331 3+ **Score:** 40.173  
**Composition:** Hex5HexNAc5NeuAc1dHex1-AA **Intensity coverage [%]:** 0.49  
**Accession:** 36415 **Fragment coverage [%]:** 0.33

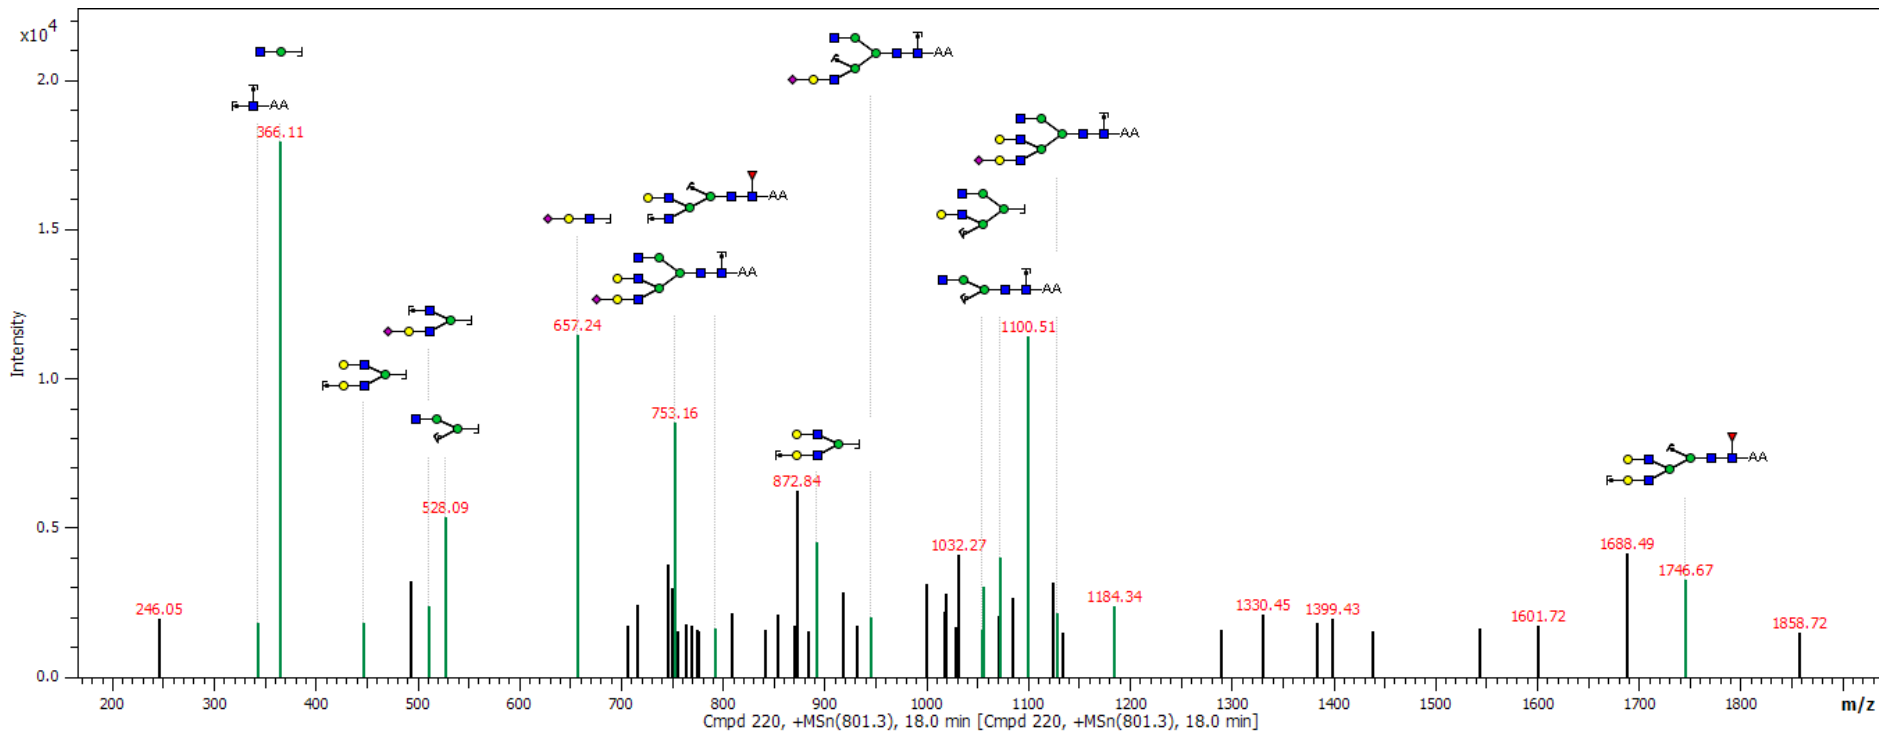

# Spectrum 117



## Glycan Search Report

Glycan: 7

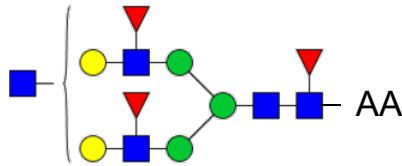

**Project path:** /N-glycans cancer/25148/comp\_25148.mgf

**MS data:** K:/Cancer-CCR/N-glycans raw data\_MS/LC-MS of the discriminators/25148\_02.d/comp\_25148.mgf

**Parent m/z:** 1202.4563 2+

**Score:** 74.572

**Composition:** Hex5HexNAc5dHex3-AA

**Intensity coverage [%]:** 0.79

**Accession:** 36239

**Fragment coverage [%]:** 0.70

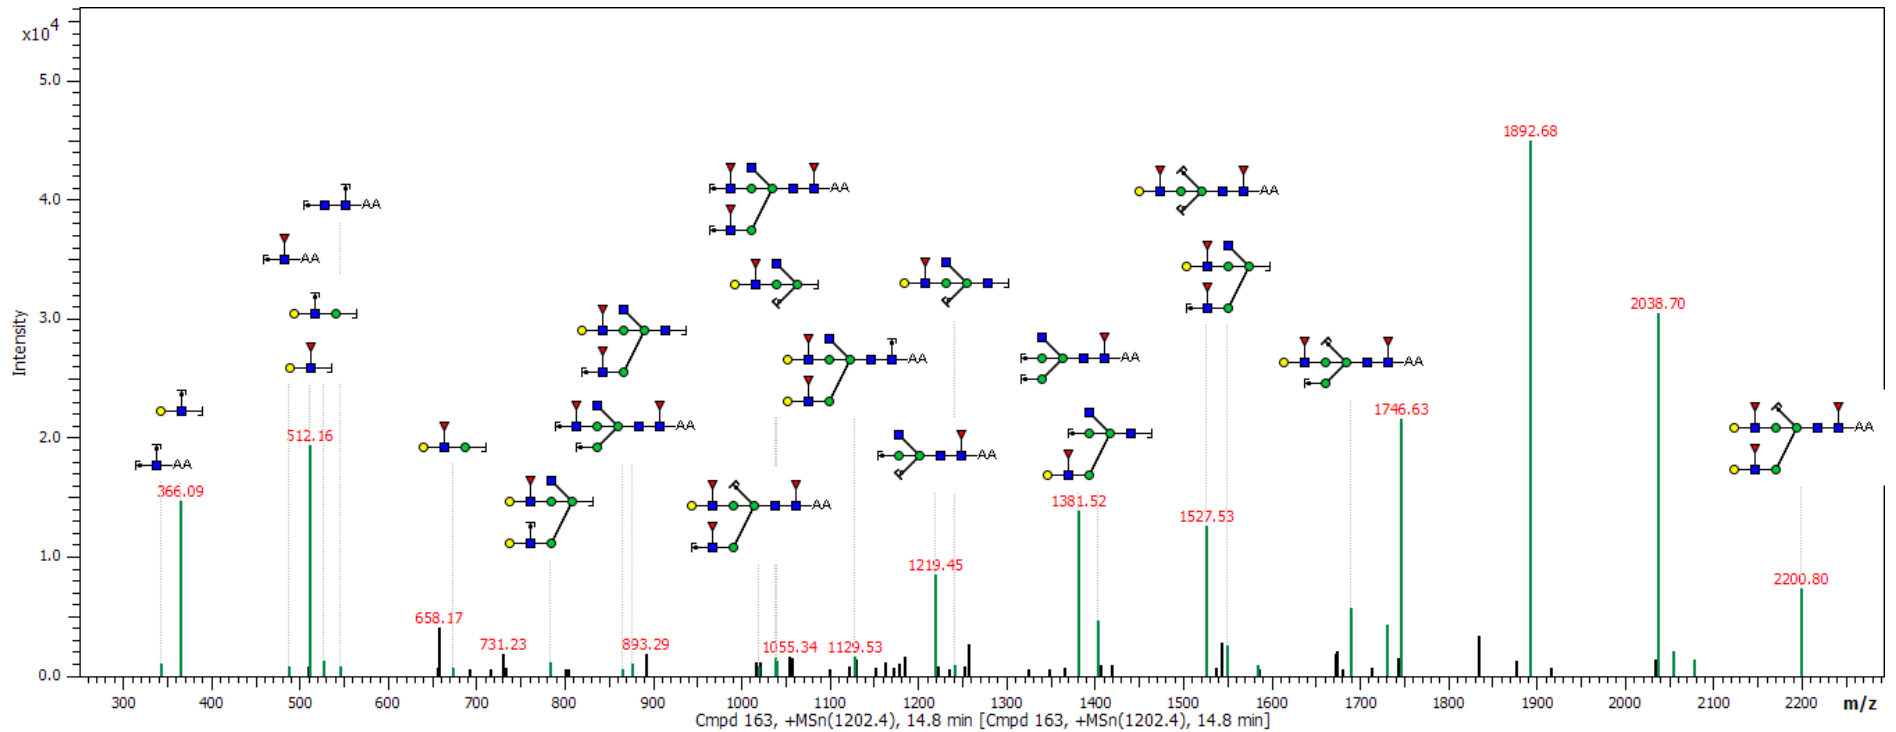

# Spectrum 118



## Glycan Search Report

Glycan: 10

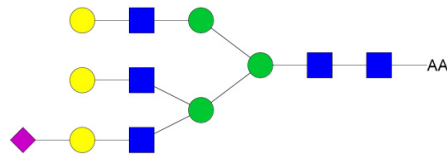

**Project path:** /N-glycans cancer/25148/comp\_25148.mgf  
**MS data:** K:/Cancer-CCR/N-glycans raw data\_MS/LC-MS of the discriminators/25148\_02.d/comp\_25148.mgf  
**Parent m/z:** 1209.9435 2+ **Score:** 72.998  
**Composition:** Hex6HexNAc5NeuAc1-AA **Intensity coverage [%]:** 0.79  
**Accession:** 36350 **Fragment coverage [%]:** 0.67

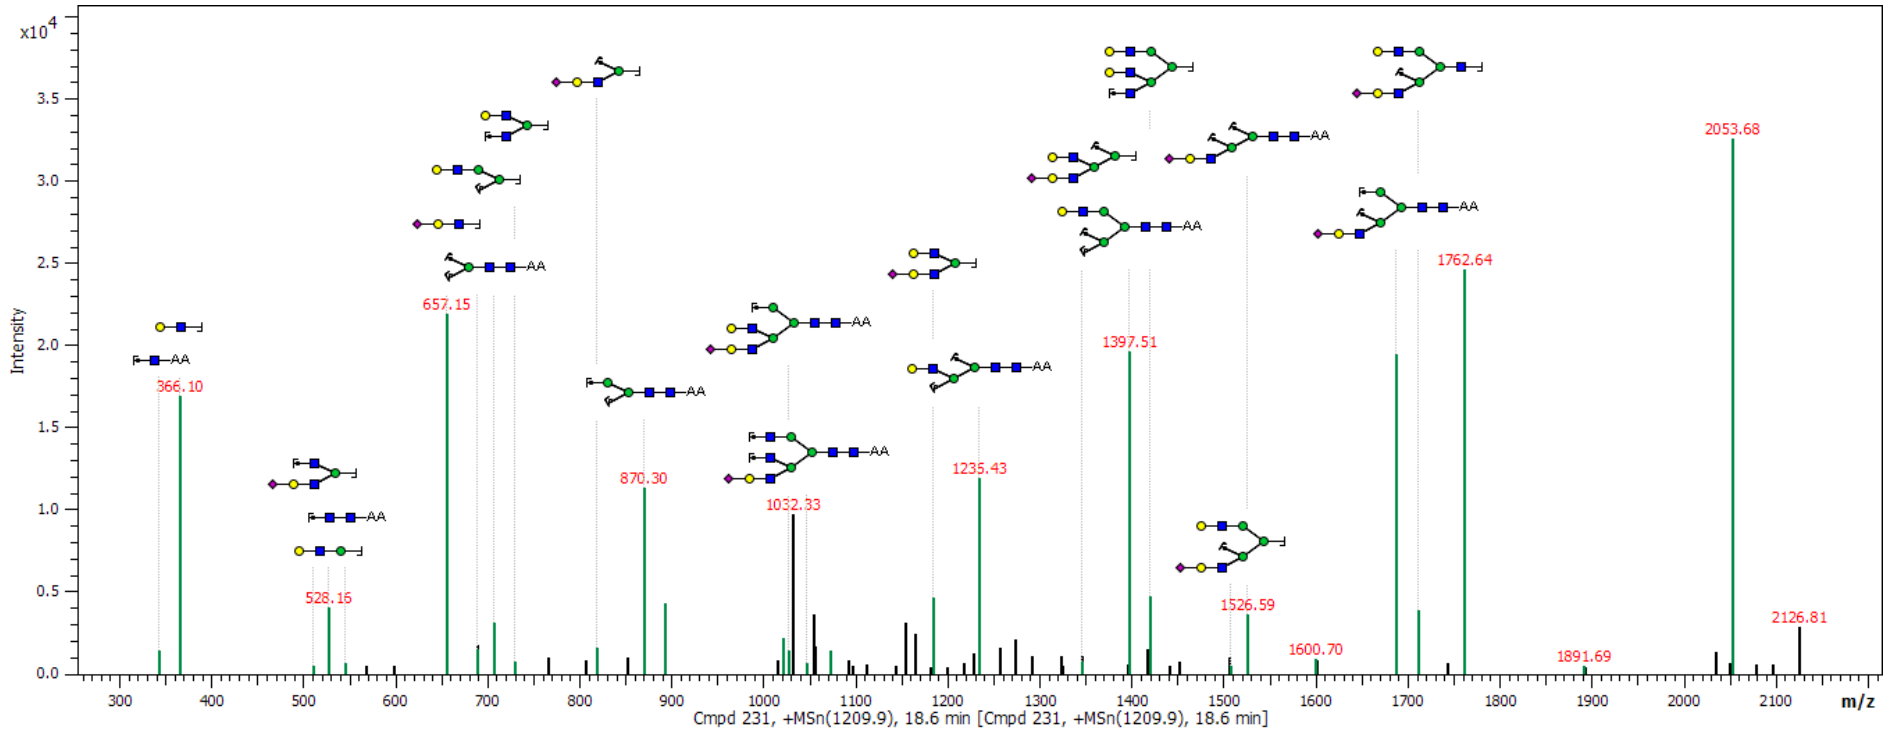

# Spectrum 119



## Glycan Search Report

Glycan: 24

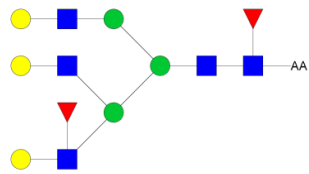

**Project path:** /N-glycans cancer/25148/comp\_25148.mgf  
**MS data:** K:/Cancer-CCR/N-glycans raw data\_MS/LC-MS of the discriminators/25148\_02.d/comp\_25148.mgf  
**Parent m/z:** 1210.4537 2+ **Score:** 53.280  
**Composition:** Hex6HexNAc5dHex2-AA **Intensity coverage [%]:** 0.63  
**Accession:** 36260 **Fragment coverage [%]:** 0.45

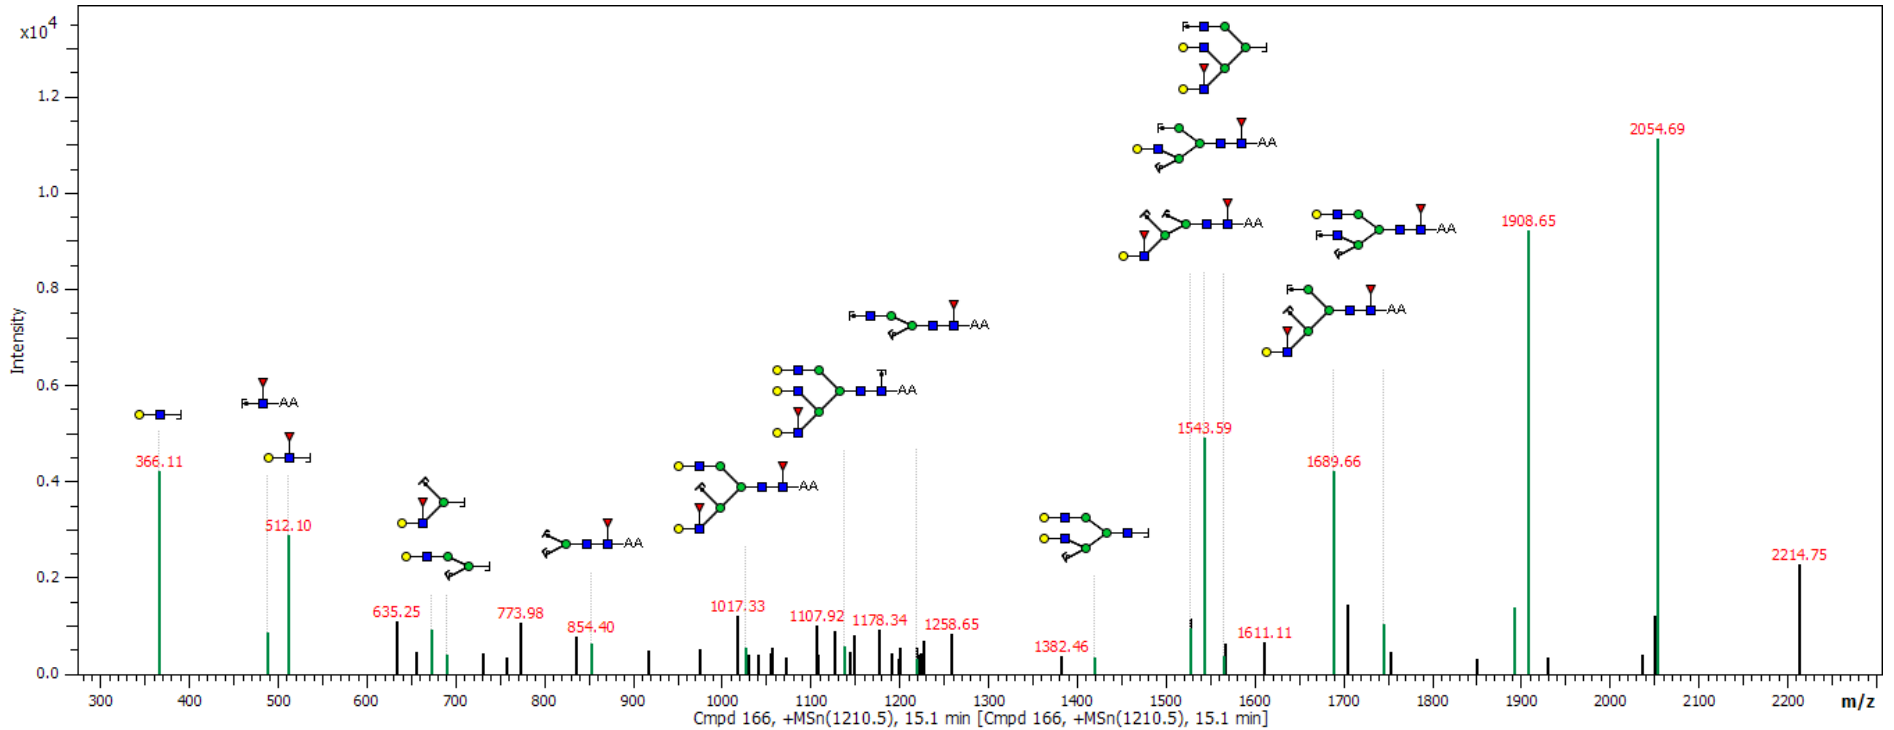

# Spectrum 120



## Glycan Search Report

Glycan: 41

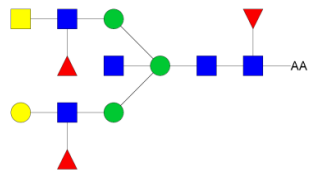

**Project path:** /N-glycans cancer/25148/comp\_25148.mgf  
**MS data:** K:/Cancer-CCR/N-glycans raw data\_MS/LC-MS of the discriminators/25148\_02.d/comp\_25148.mgf  
**Parent m/z:** 1222.9696 2+ **Score:** 30.005  
**Composition:** Hex4HexNAc6dHex3-AA **Intensity coverage [%]:** 0.66  
**Accession:** 29530 **Fragment coverage [%]:** 0.14

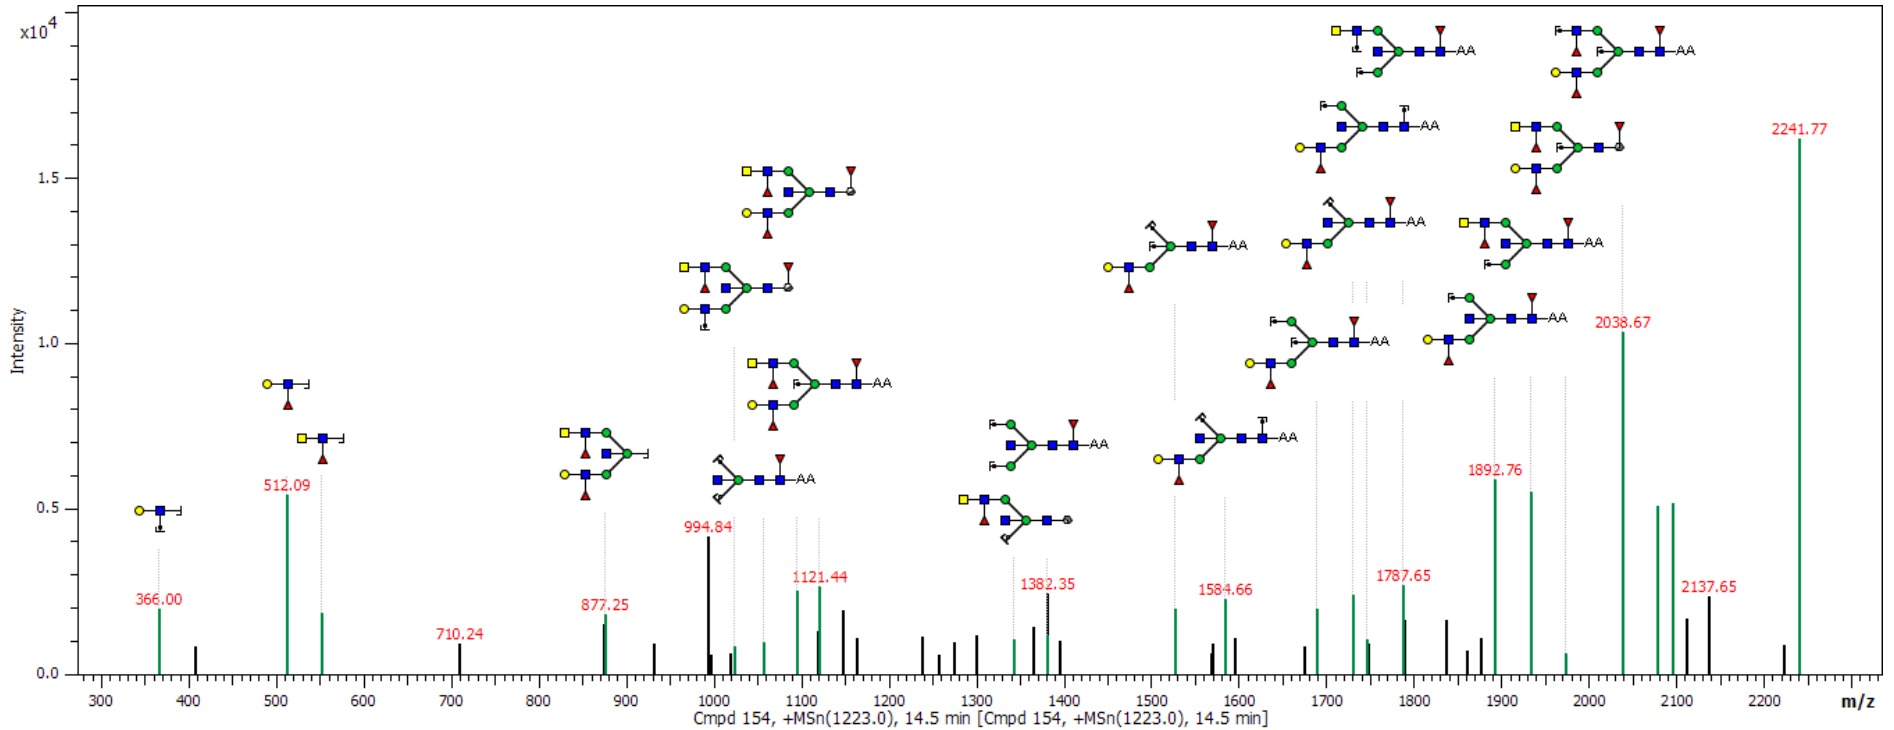

# Spectrum 121



## Glycan Search Report

Glycan: 20

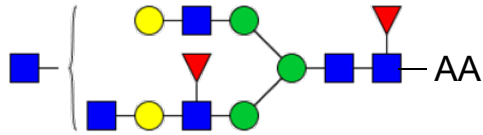

**Project path:** /N-glycans cancer/25148/comp\_25148.mgf

**MS data:** K:/Cancer-CCR/N-glycans raw data\_MS/LC-MS of the discriminators/25148\_02.d/comp\_25148.mgf

**Parent m/z:** 820.9804 3+

**Score:** 56.989

**Composition:** Hex5HexNAc6dHex2-AA

**Intensity coverage [%]:** 0.61

**Accession:** 36376

**Fragment coverage [%]:** 0.53

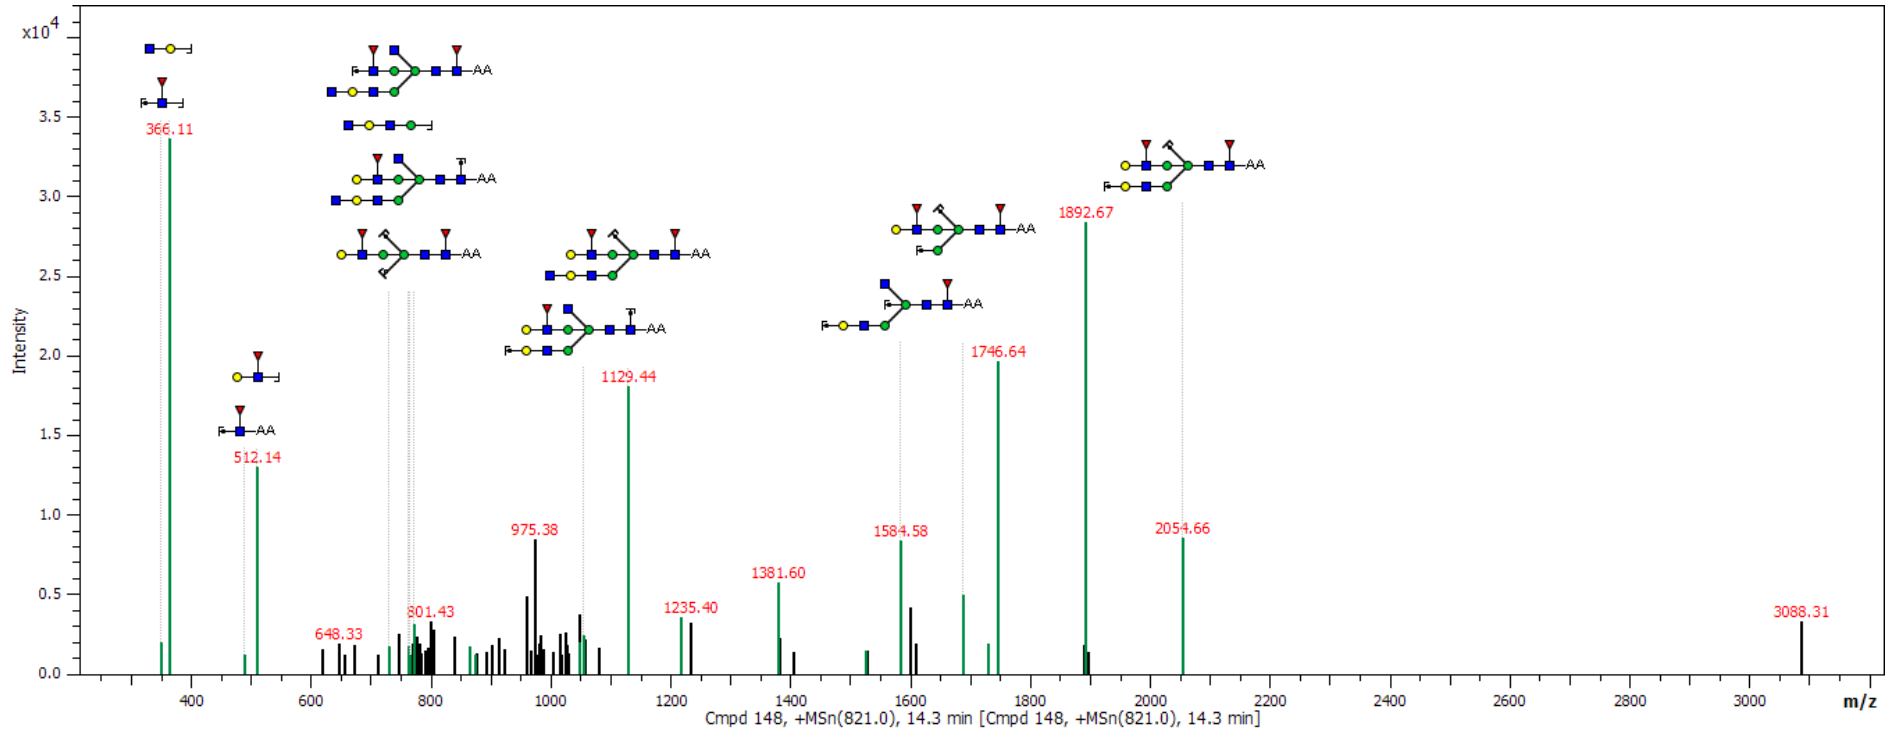



# Spectrum 122

## Glycan Search Report

Glycan: 3

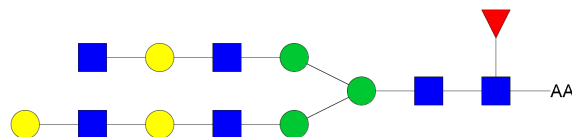

**Project path:** /N-glycans cancer/25148/comp\_25148.mgf  
**MS data:** K:/Cancer-CCR/N-glycans raw data\_MS/LC-MS of the discriminators/25148\_02.d/comp\_25148.mgf  
**Parent m/z:** 826.3121 3+ **Score:** 78.983  
**Composition:** Hex6HexNAc6dHex1-AA **Intensity coverage [%]:** 0.88  
**Accession:** 36298 **Fragment coverage [%]:** 0.71

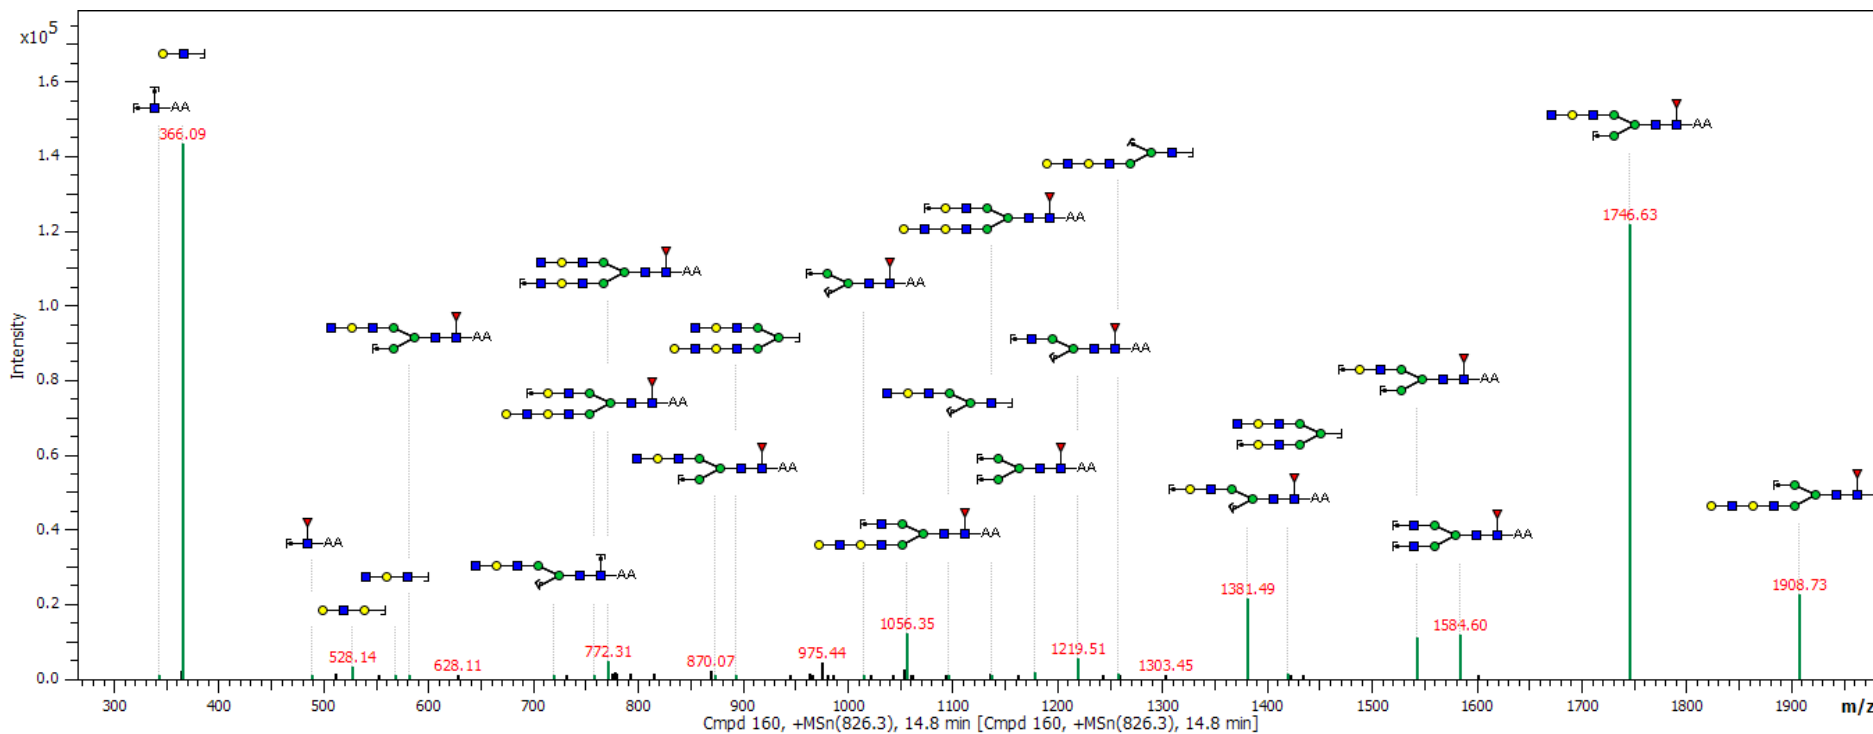



# Spectrum 123

Lift of 2488.8 [M-H]<sup>-</sup>  
 dHex1Hex5HexNAc4Neu5Ac2-AA

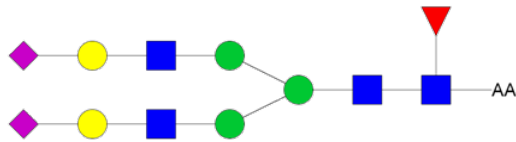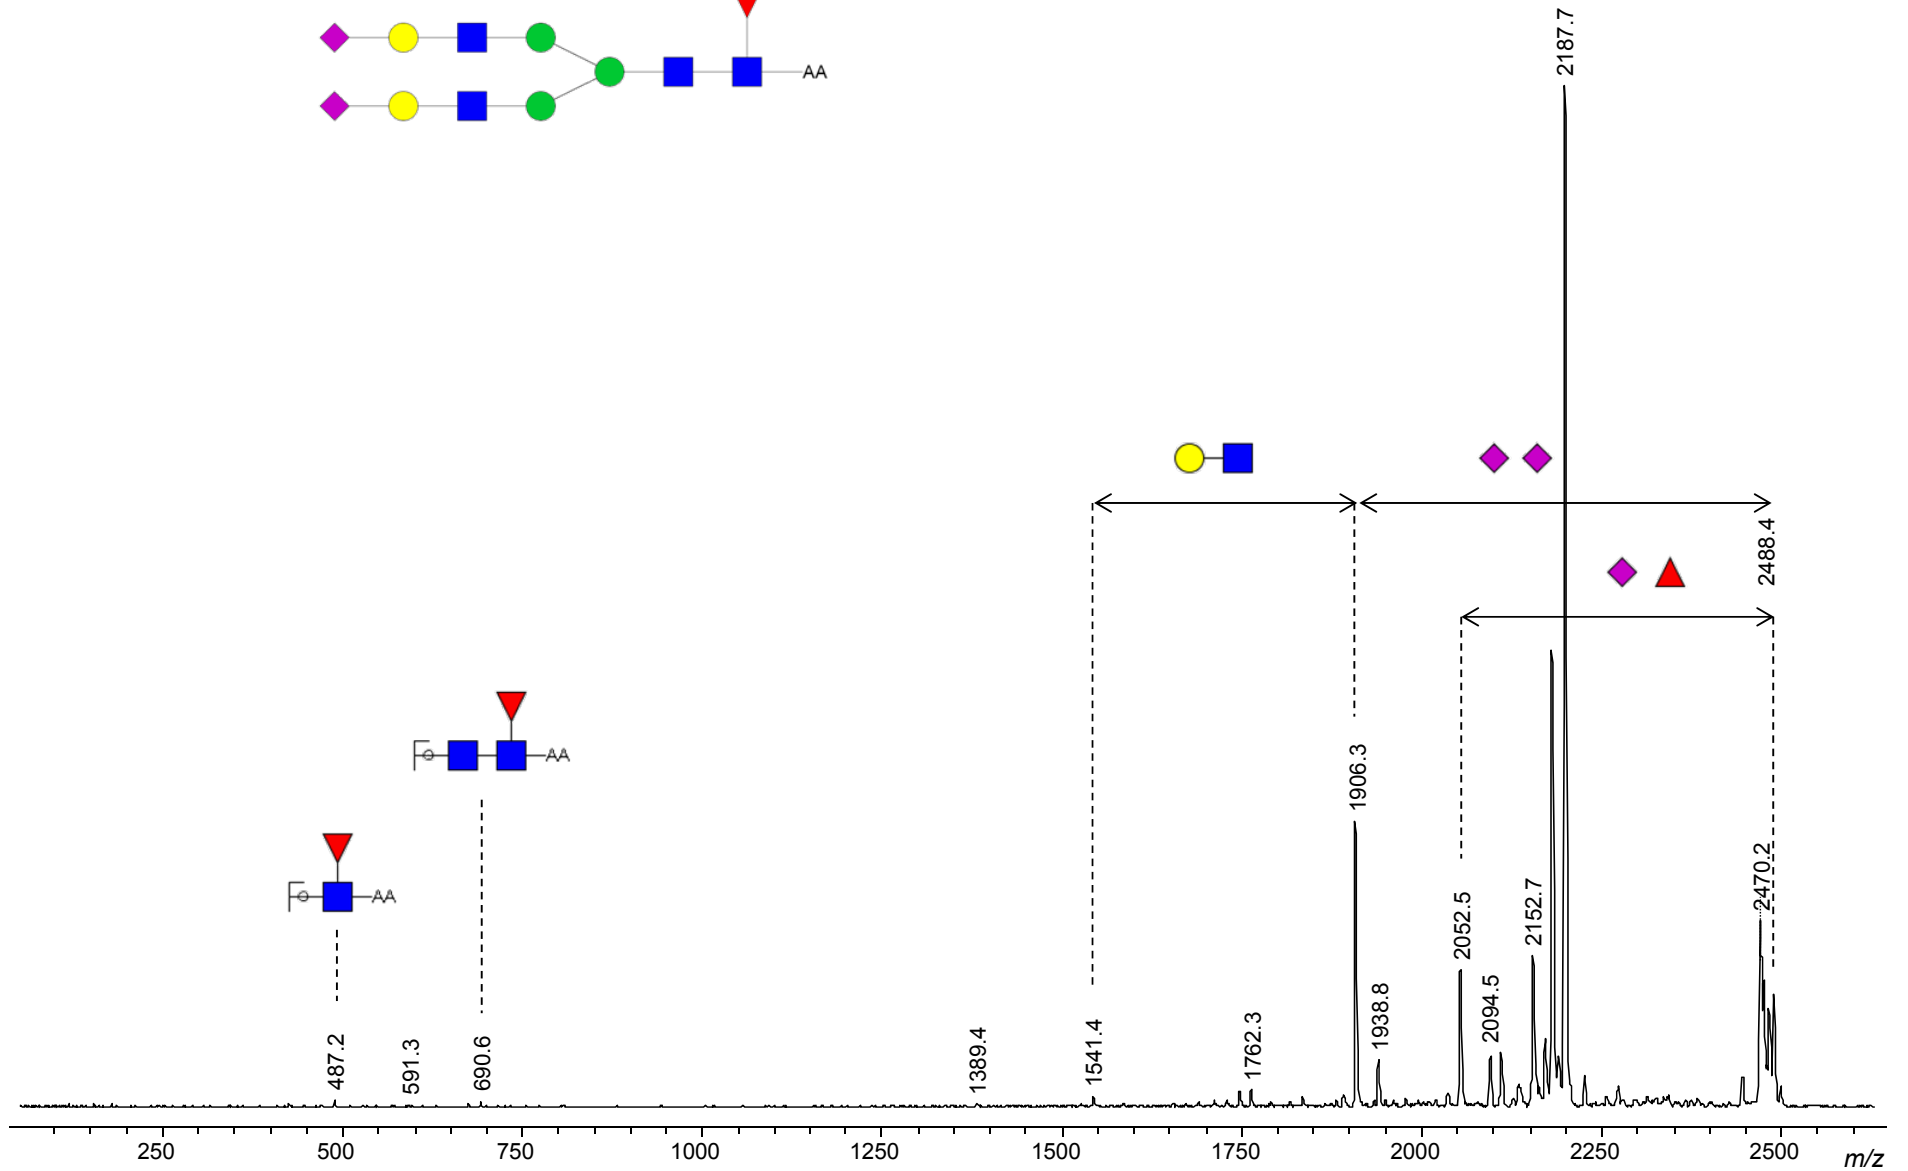



# Spectrum 124

## Glycan Search Report

Glycan: 13

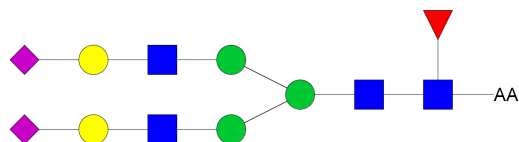

**Project path:** /N-glycans cancer/25148/comp\_25148.mgf  
**MS data:** K:/Cancer-CCR/N-glycans raw data\_MS/LC-MS of the discriminators/25148\_02.d/comp\_25148.mgf  
**Parent m/z:** 1245.9541 2+ **Score:** 68.289  
**Composition:** Hex5HexNAc4NeuAc2dHex1-AA **Intensity coverage [%]:** 0.77  
**Accession:** 36307 **Fragment coverage [%]:** 0.61

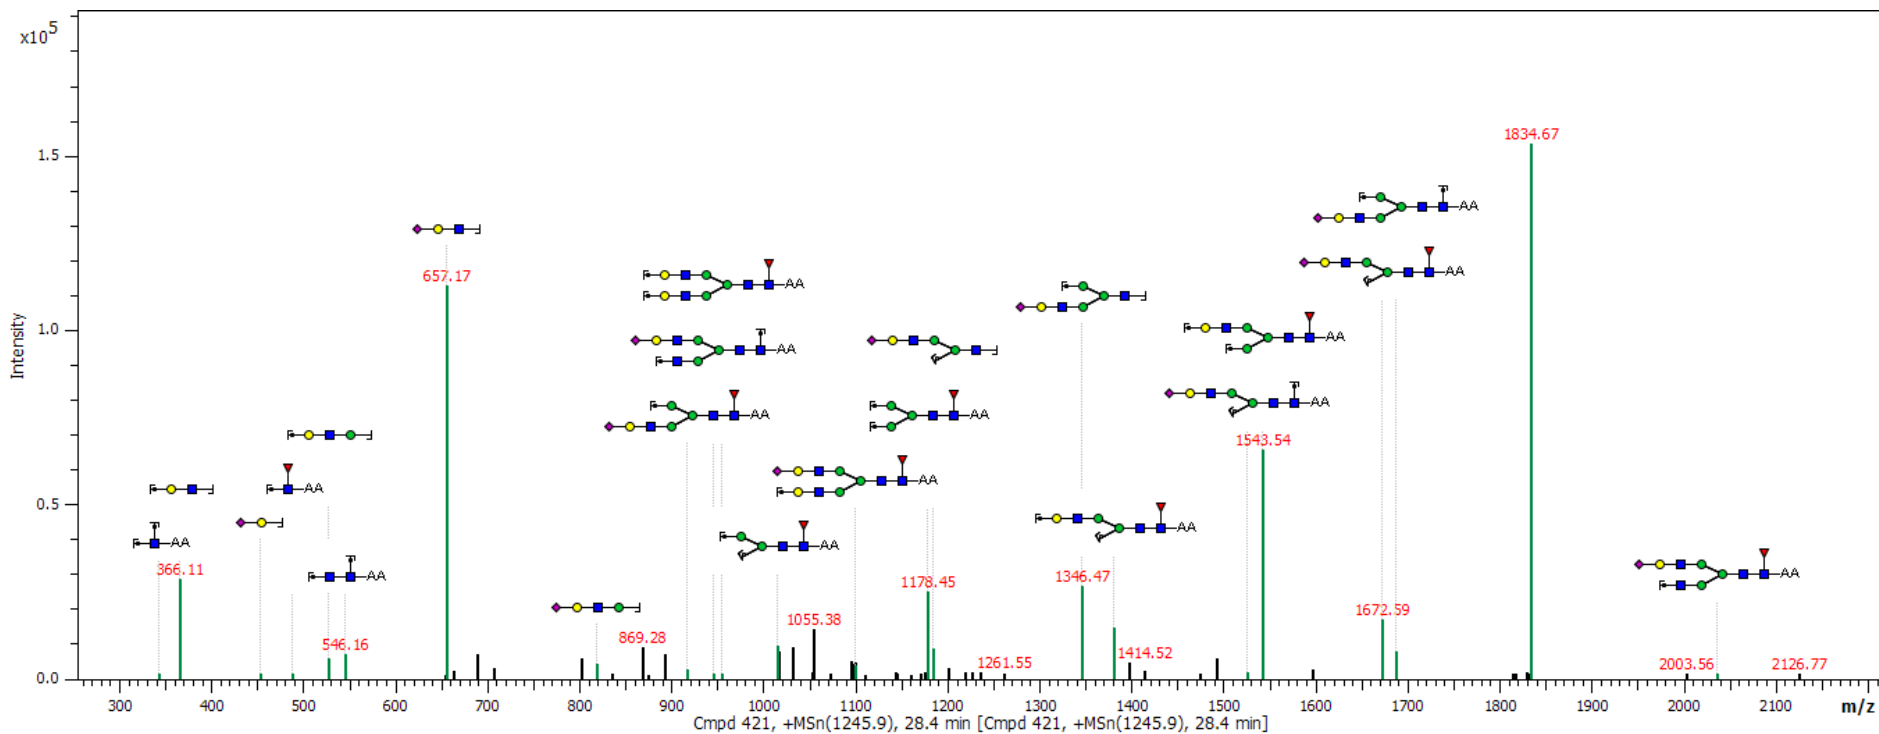



# Spectrum 125

## Glycan Search Report

Glycan: 15

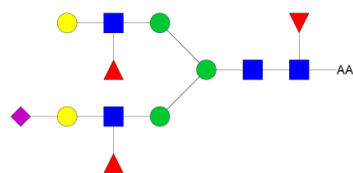

**Project path:** /N-glycans cancer/25142/comp\_25142\_01.mgf  
**MS data:** K:/Cancer-CCR/N-glycans raw data\_MS/LC-MS of the discriminators/25142\_01.d/comp\_25142\_01.mgf  
**Parent m/z:** 831.3119 3+ **Score:** 26.917  
**Composition:** Hex5HexNAc4NeuAc1dHex3-AA **Intensity coverage [%]:** 0.58  
**Accession:** 14007 **Fragment coverage [%]:** 0.13

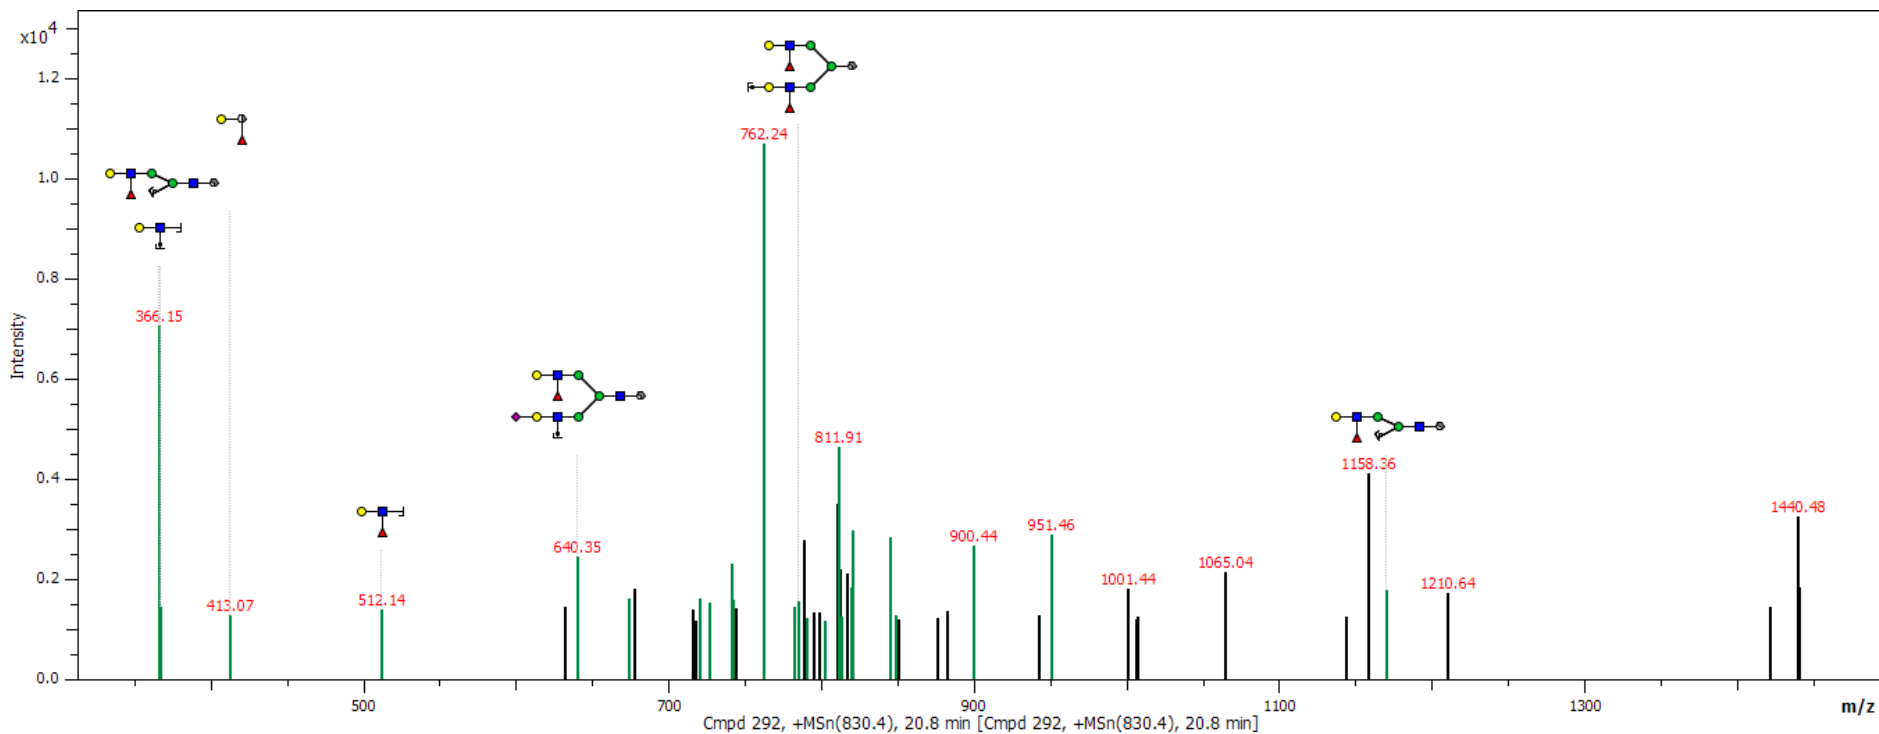

Spectrum 126

Lift of 2538.6[M-H]<sup>-</sup>

S1dHex2Hex5HexNAc6-AA

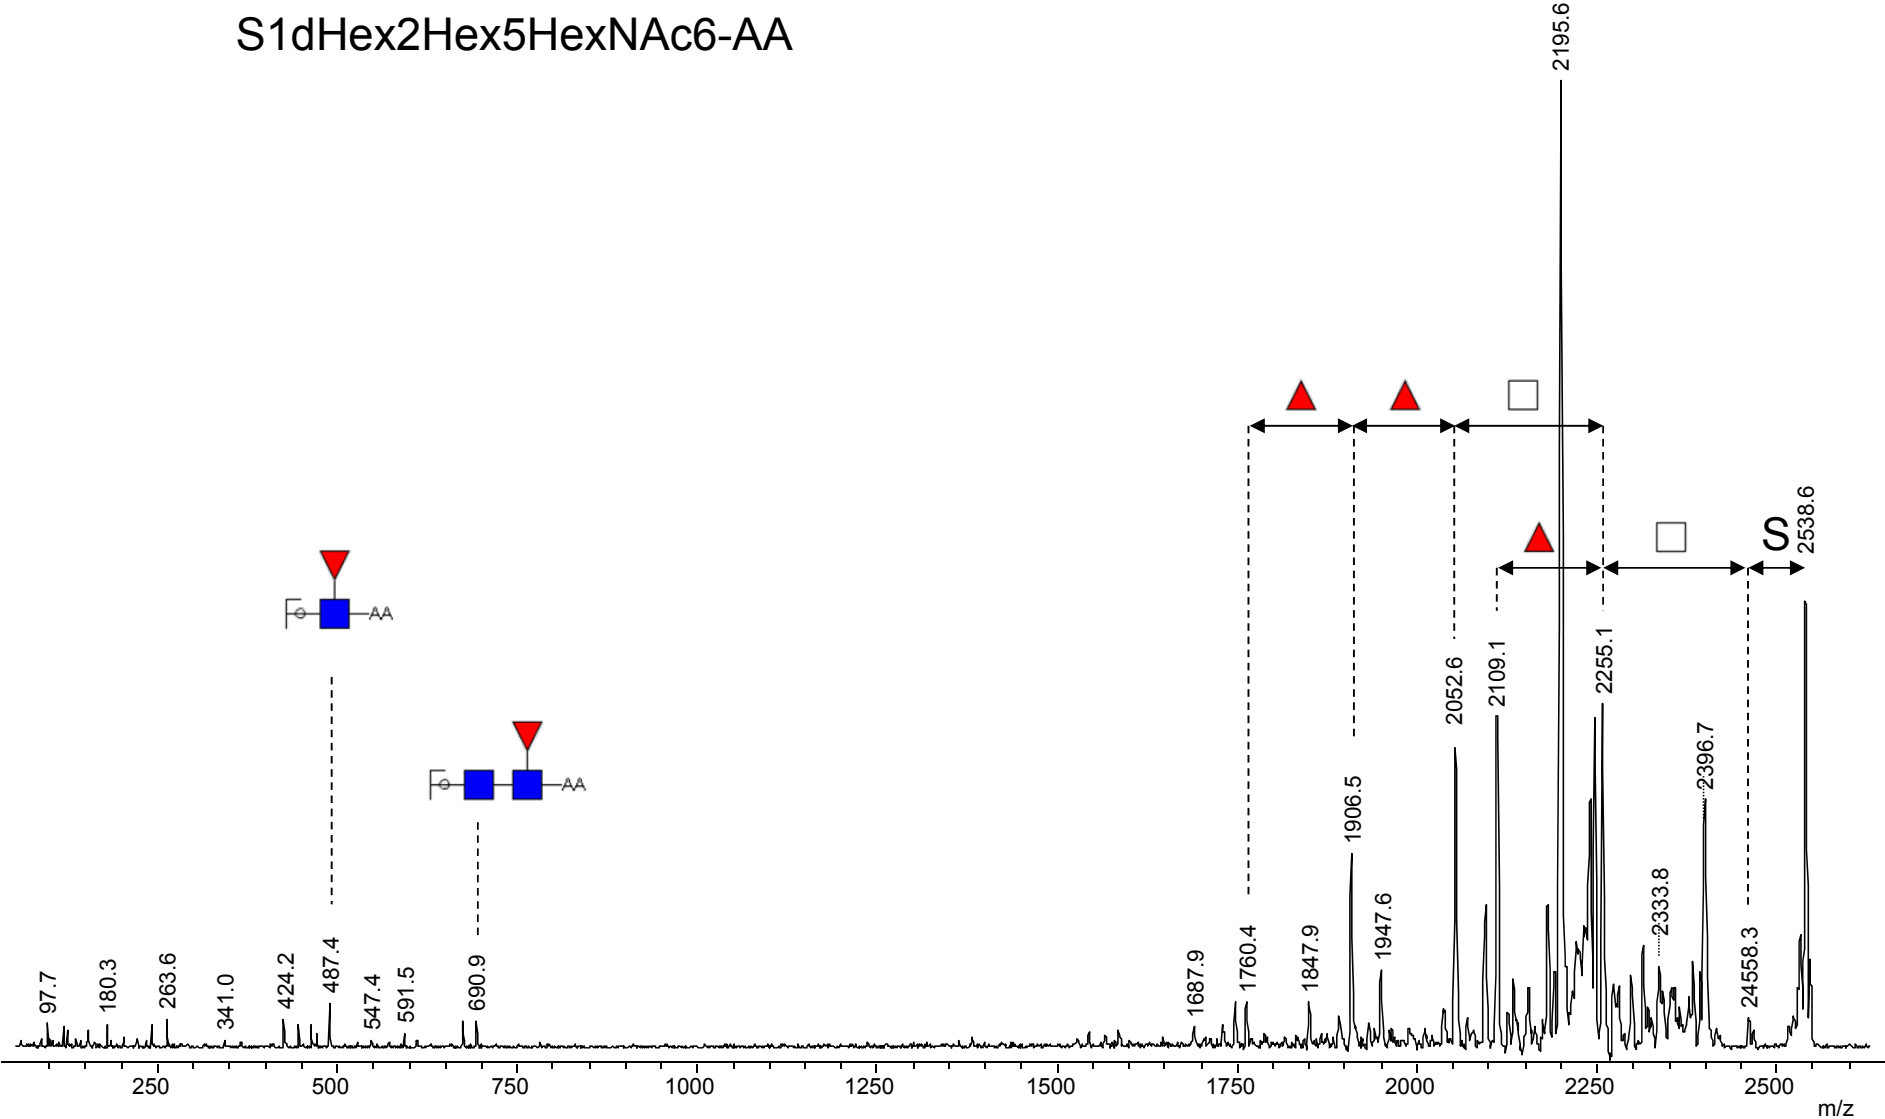



# Spectrum 127

## Glycan Search Report

Glycan: 26

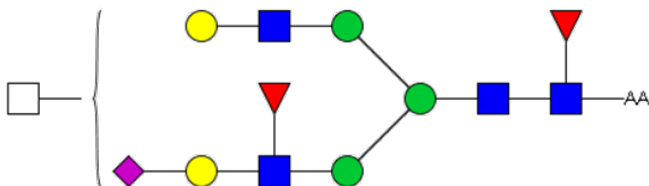

**Project path:** /N-glycans cancer/25148/comp\_25148.mgf

**MS data:** K:/Cancer-CCR/N-glycans raw data\_MS/LC-MS of the discriminators/25148\_02.d/comp\_25148.mgf

**Parent m/z:** 850.3191 3+

**Score:** 52.119

**Composition:** Hex5HexNAc5NeuAc1dHex2-AA

**Intensity coverage [%]:** 0.66

**Accession:**

**Fragment coverage [%]:** 0.41

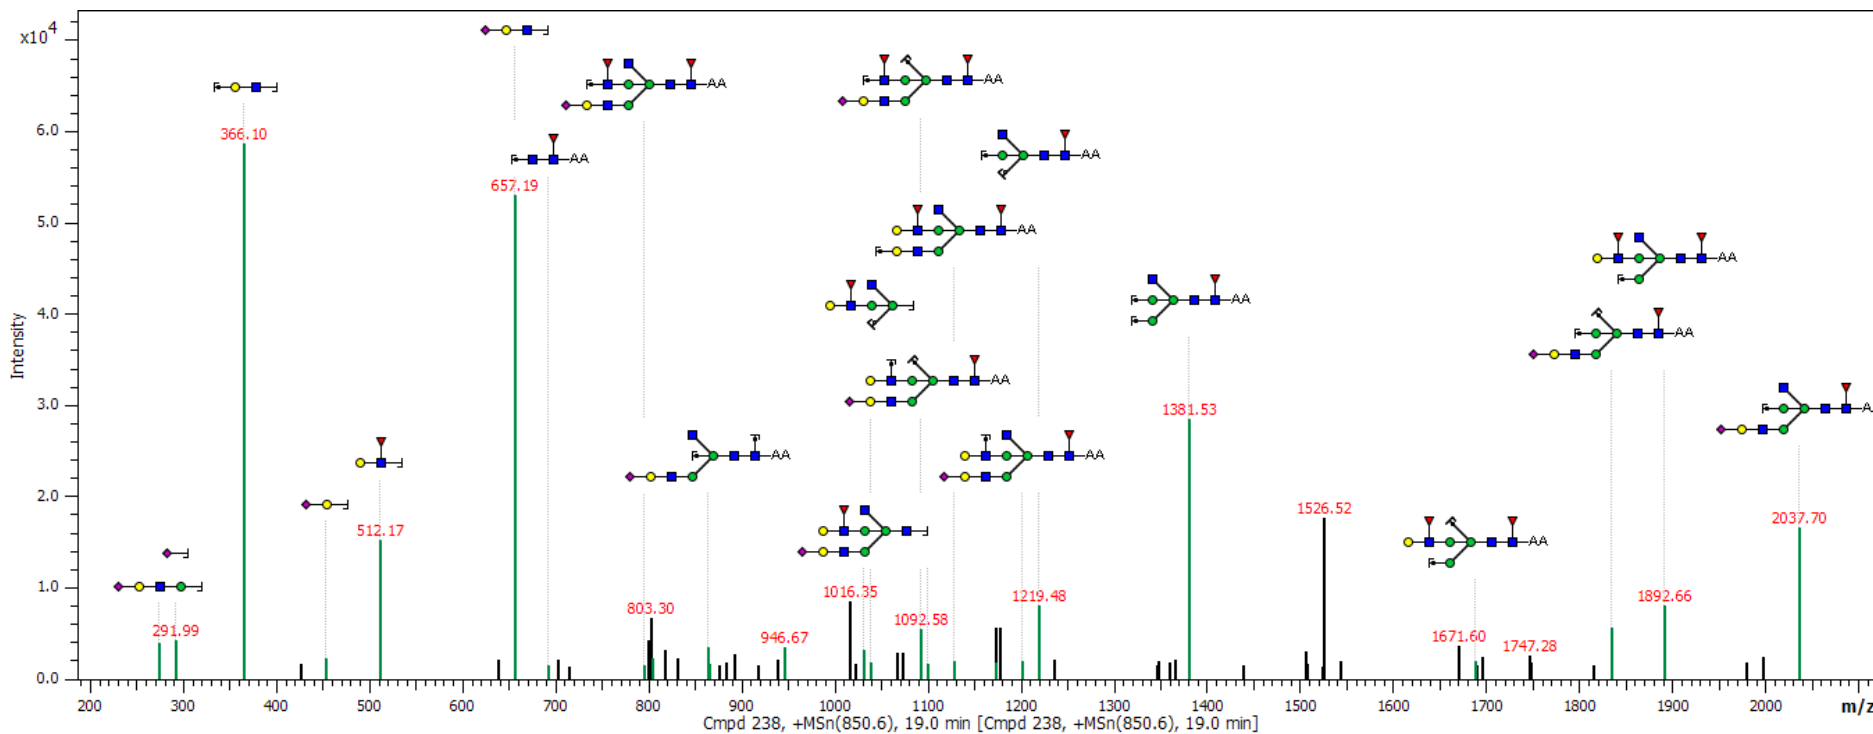



# Spectrum 128

## Glycan Search Report

Glycan: 14

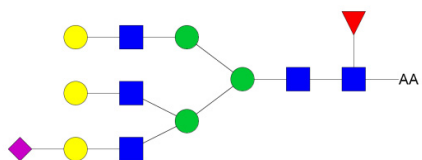

**Project path:** /N-glycans cancer/25148/comp\_25148.mgf  
**MS data:** K:/Cancer-CCR/N-glycans raw data\_MS/LC-MS of the discriminators/25148\_02.d/comp\_25148.mgf  
**Parent m/z:** 1282.9725 2+ **Score:** 66.069  
**Composition:** Hex6HexNAc5NeuAc1dHex1-AA **Intensity coverage [%]:** 0.82  
**Accession:** 36262 **Fragment coverage [%]:** 0.53

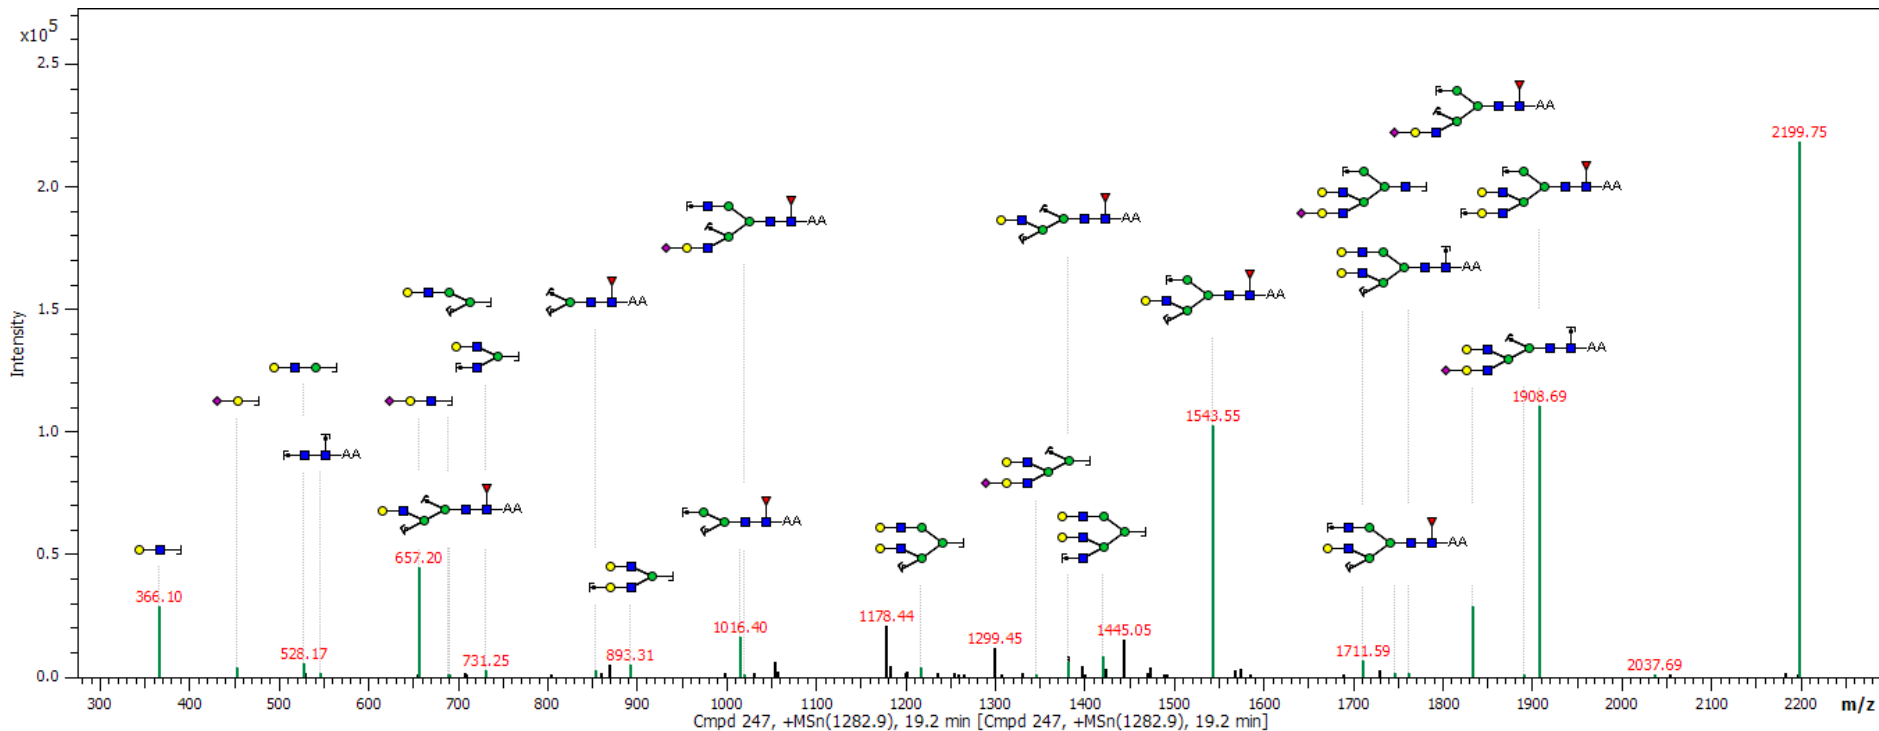

# Spectrum 129

## ESI MS/MS of [864.0 +3H]<sup>3+</sup>

### dHex2Hex4HexNAc6Neu5Ac1-AA

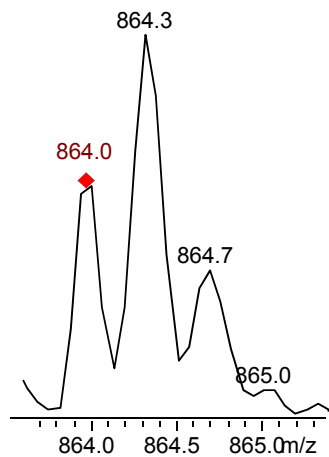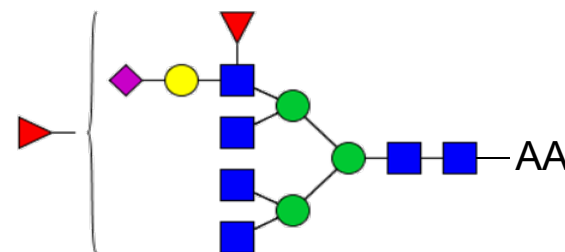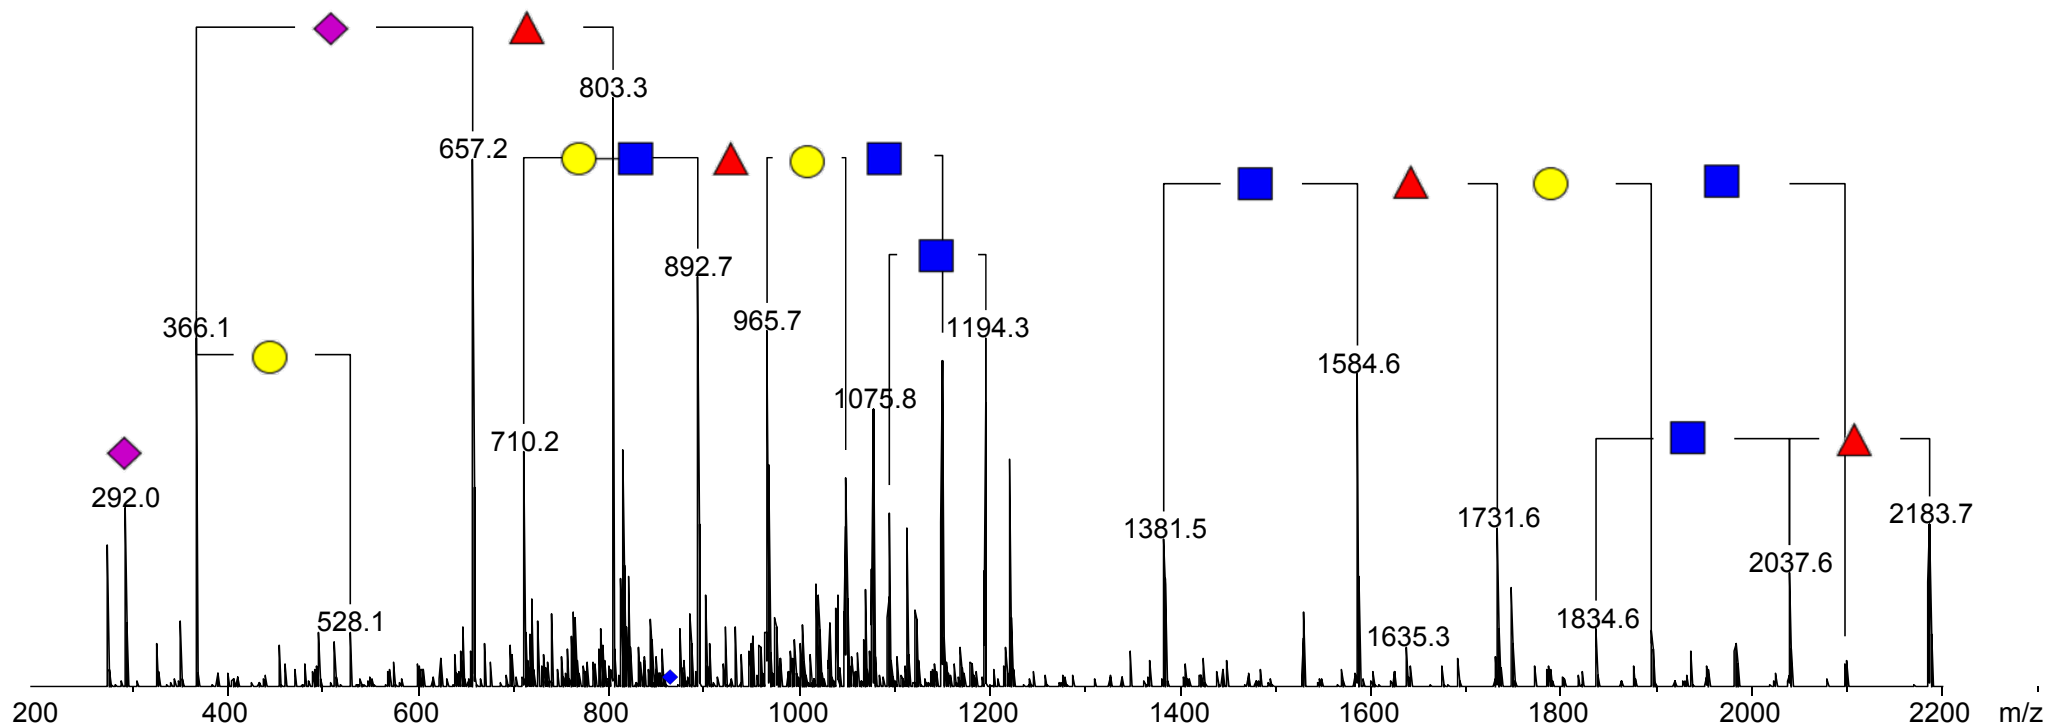

# Spectrum 130

Lift of 2596.0 [M-H]<sup>-</sup>  
S1dHex1Hex5HexNAc7-AA

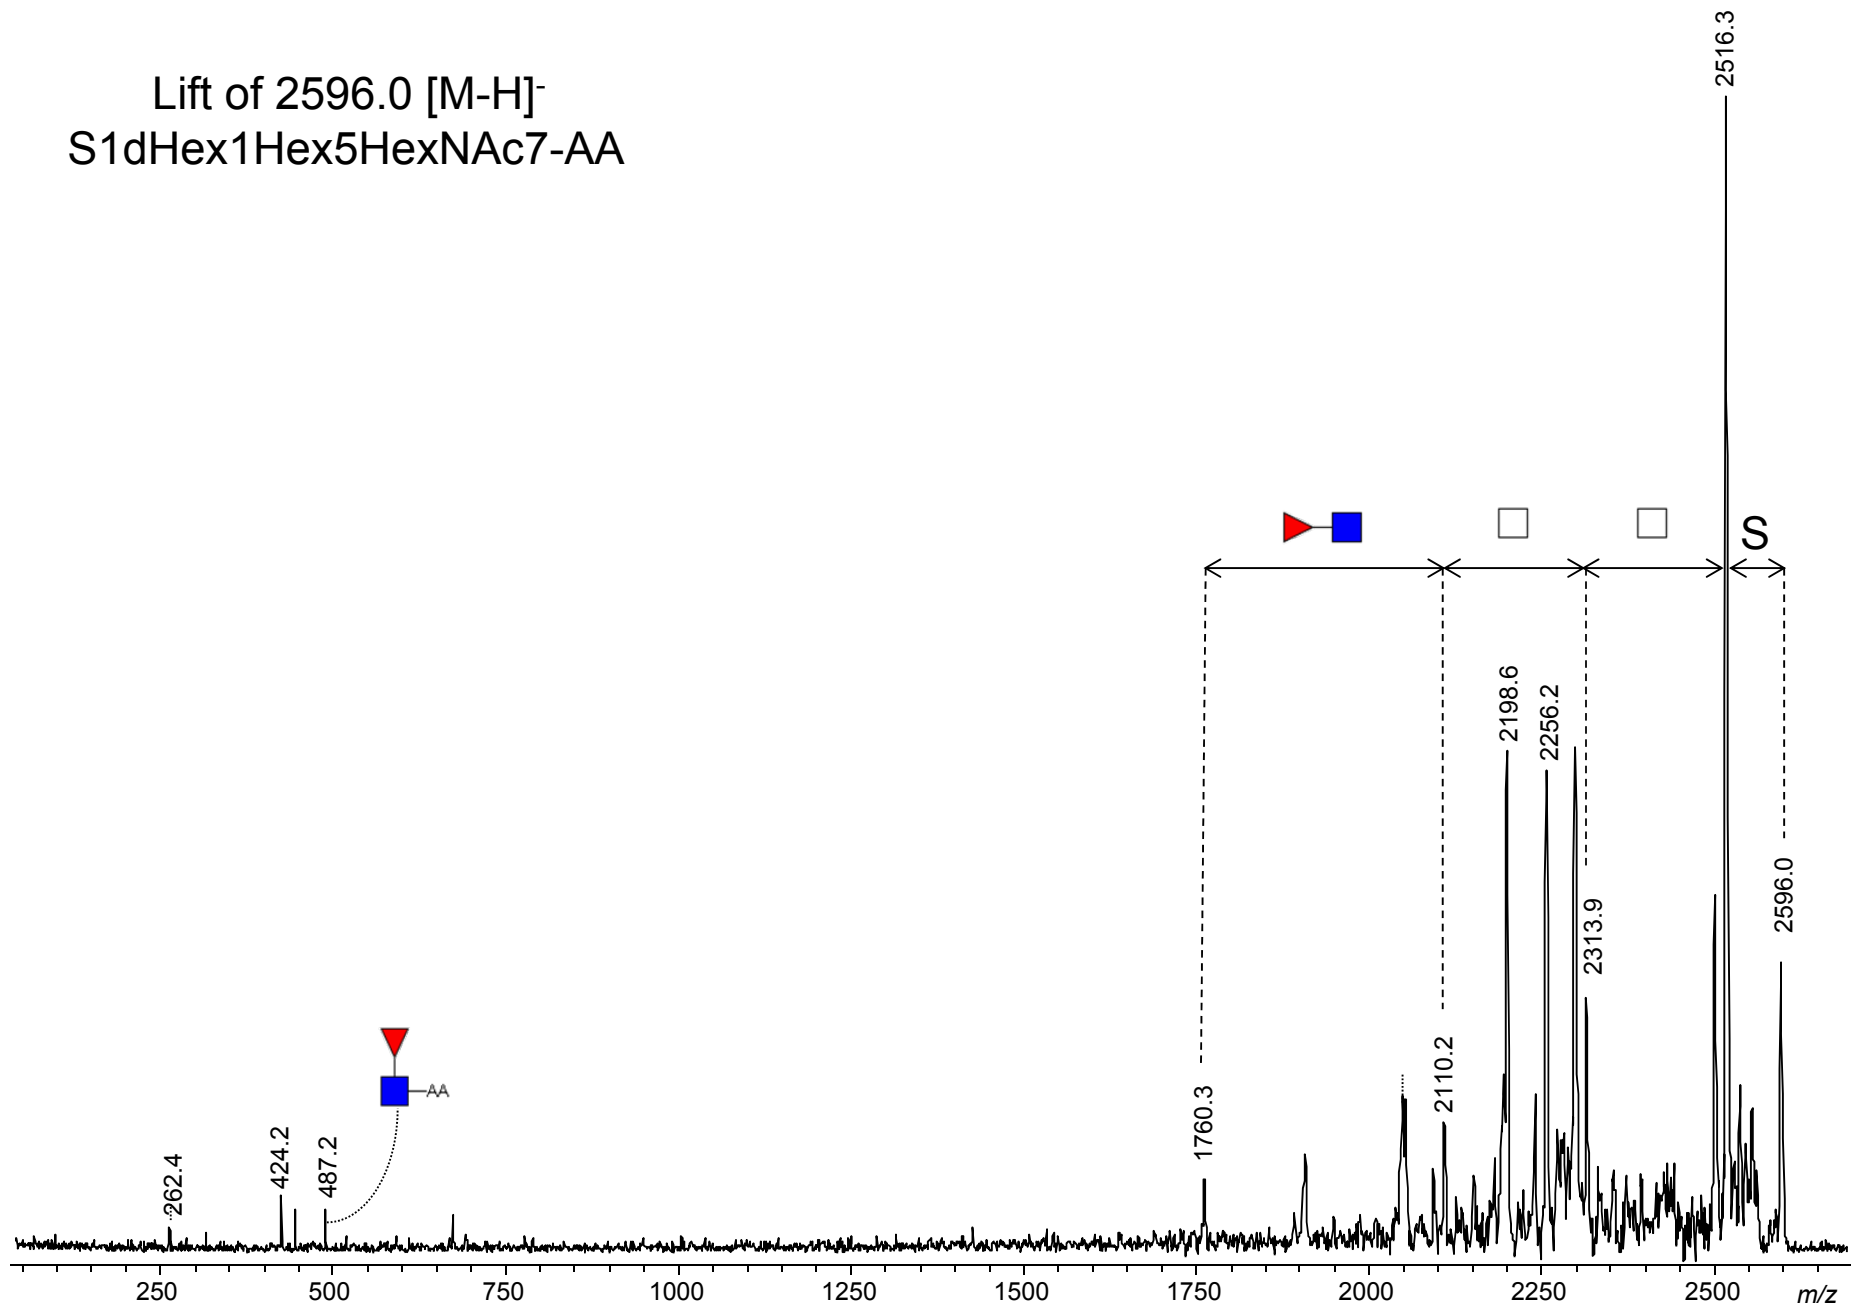





# Spectrum 131

## Glycan Search Report

Glycan: 21

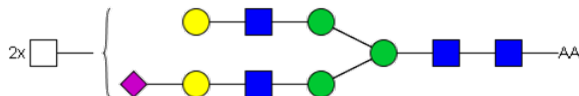

**Project path:** /N-glycans cancer/25148/comp\_25148.mgf

**MS data:** K:/Cancer-CCR/N-glycans raw data\_MS/LC-MS of the discriminators/25148\_02.d/comp\_25148.mgf

**Parent m/z:** 869.3263 3+

**Score:** 55.577

**Composition:** Hex5HexNAc6NeuAc1dHex1-AA

**Intensity coverage [%]:** 0.68

**Accession:** 36128

**Fragment coverage [%]:** 0.45

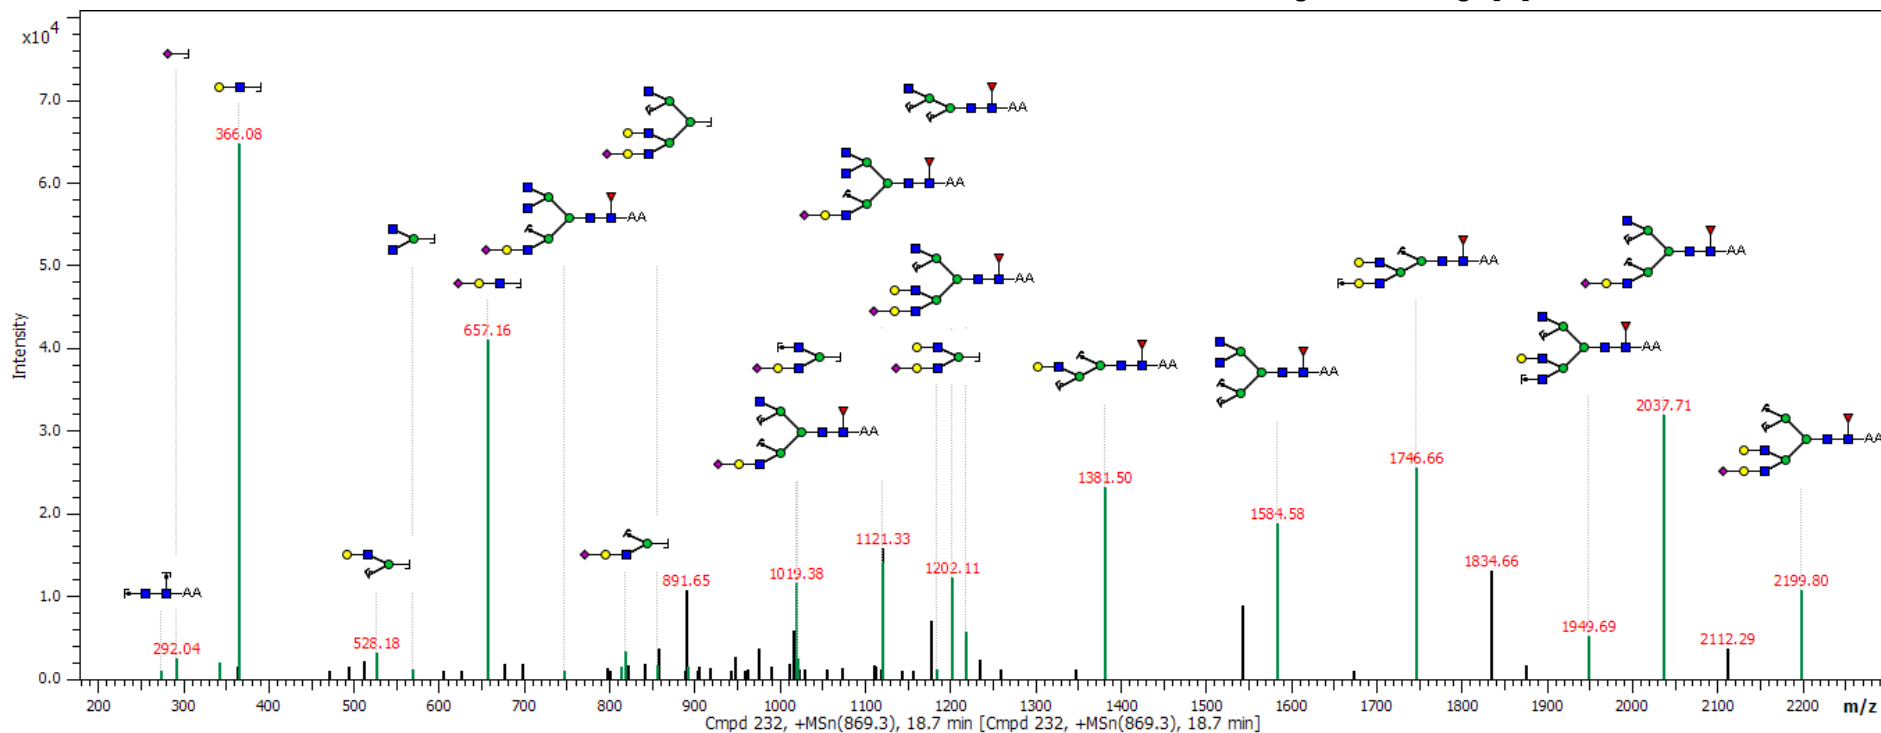



# Spectrum 132

## Glycan Search Report

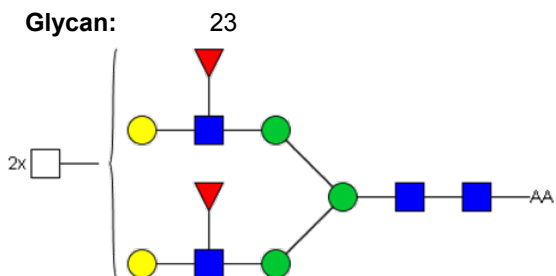

**Project path:** /N-glycans cancer/25148/comp\_25148.mgf  
**MS data:** K:/Cancer-CCR/N-glycans raw data\_MS/LC-MS of the discriminators/25148\_02.d/comp\_25148.mgf  
**Parent m/z:** 1303.9960 2+      **Score:** 54.112  
**Composition:** Hex5HexNAc6dHex3-AA      **Intensity coverage [%]:** 0.59  
**Accession:** 36219      **Fragment coverage [%]:** 0.50

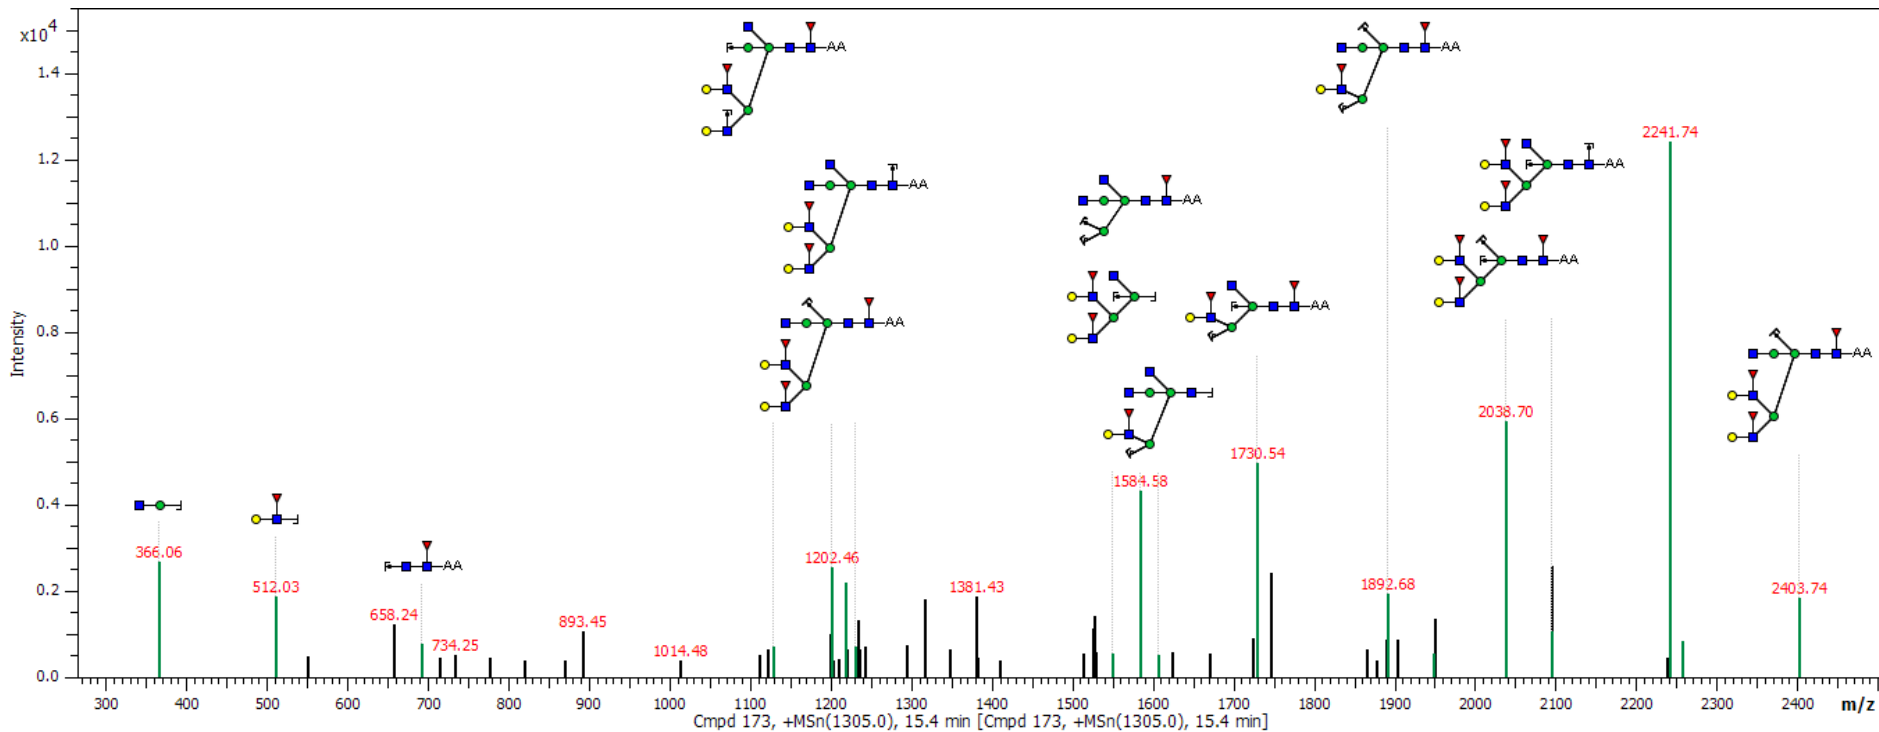

# Spectrum 133

ESI MS/MS of  $[888.7 + 3H]^{3+}$   
dHex2Hex5HexNAc7-AA

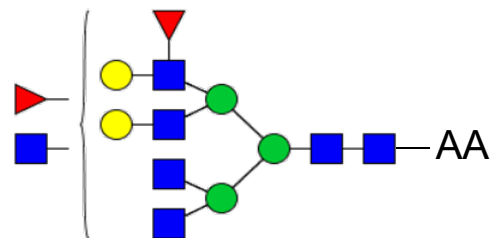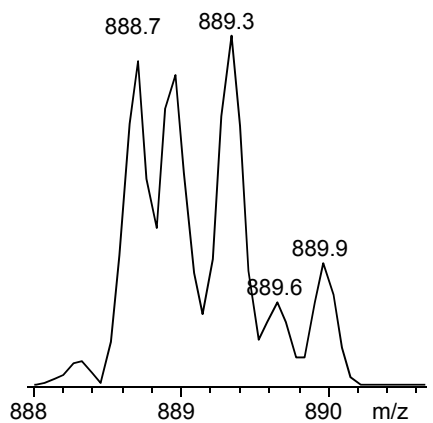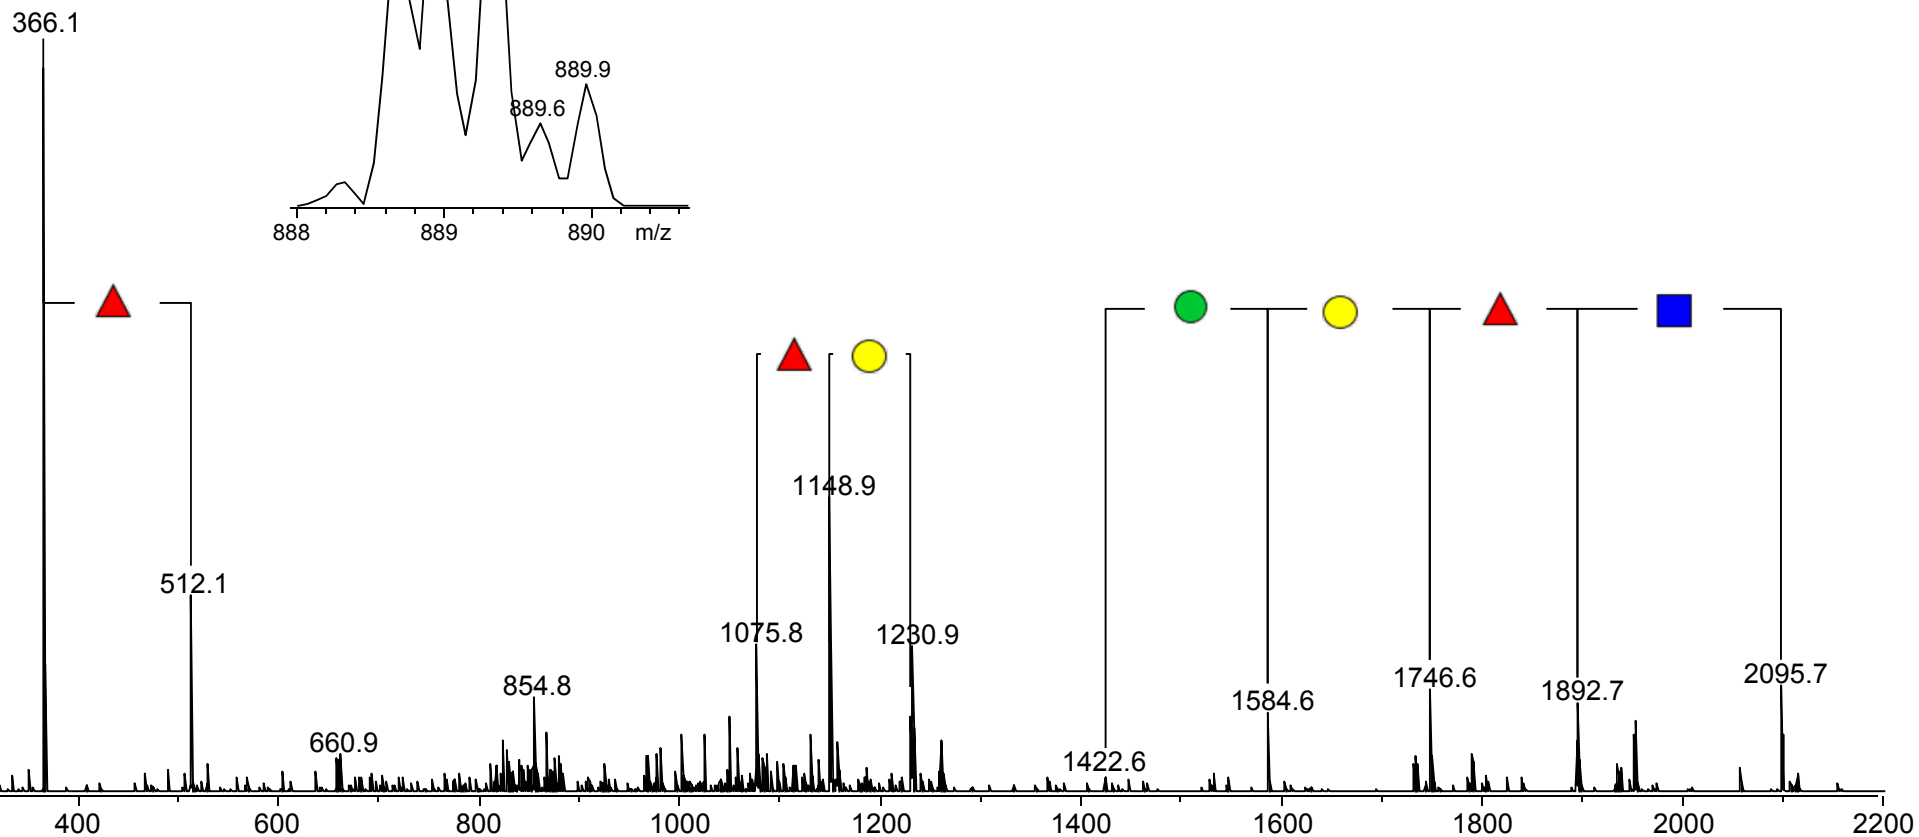

# Spectrum 134

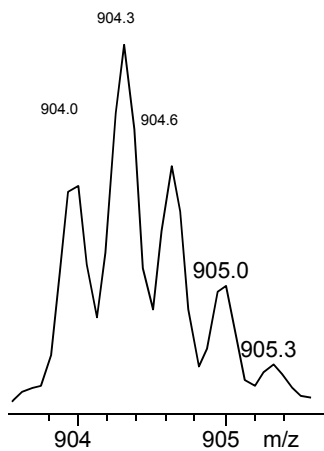

ESI MS/MS of [904.0 + 3H]<sup>3+</sup>

Hex6HexNAc5Neu5Ac2-AA

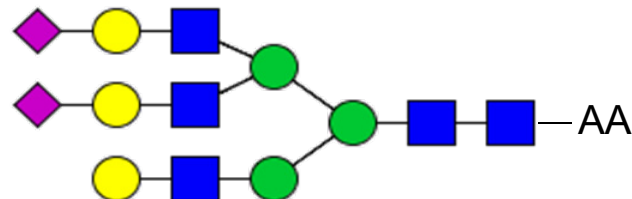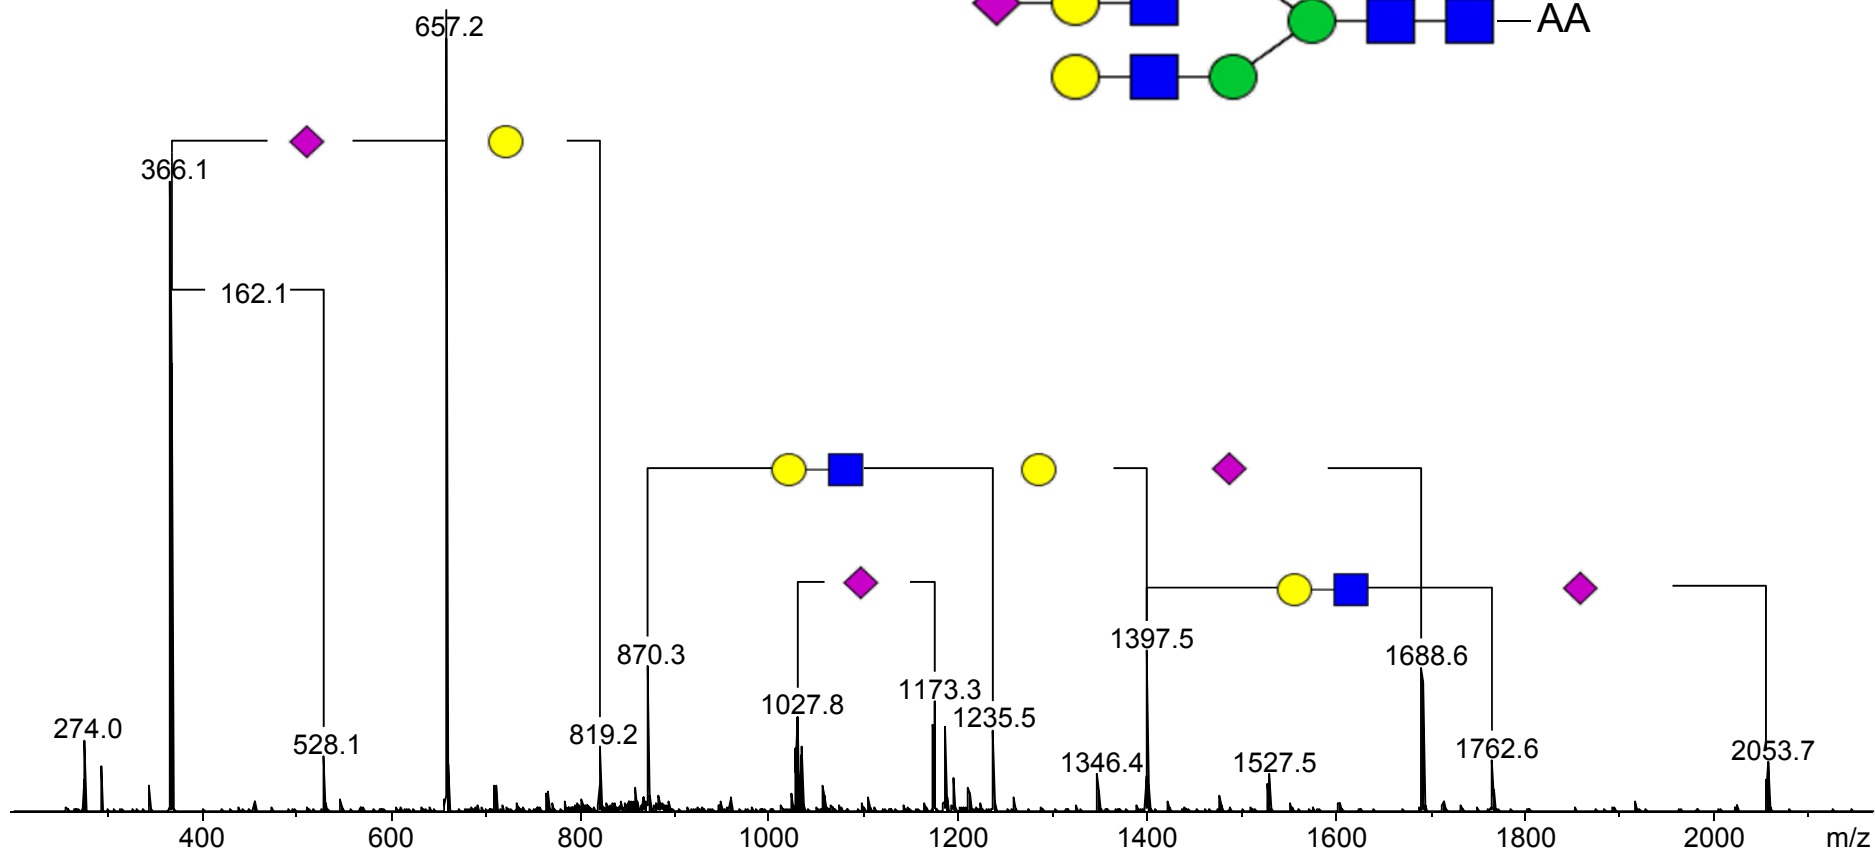

# Spectrum 135

ESI MS/MS of  $[904.3 + 3H]^{3+}$

dHex2Hex6HexNAc5Neu5Ac1-AA

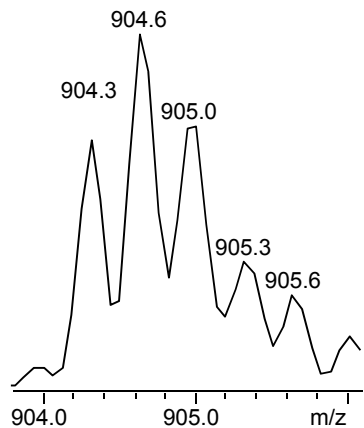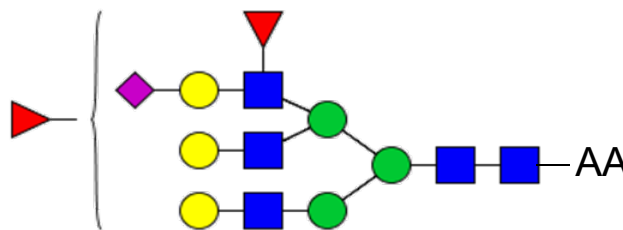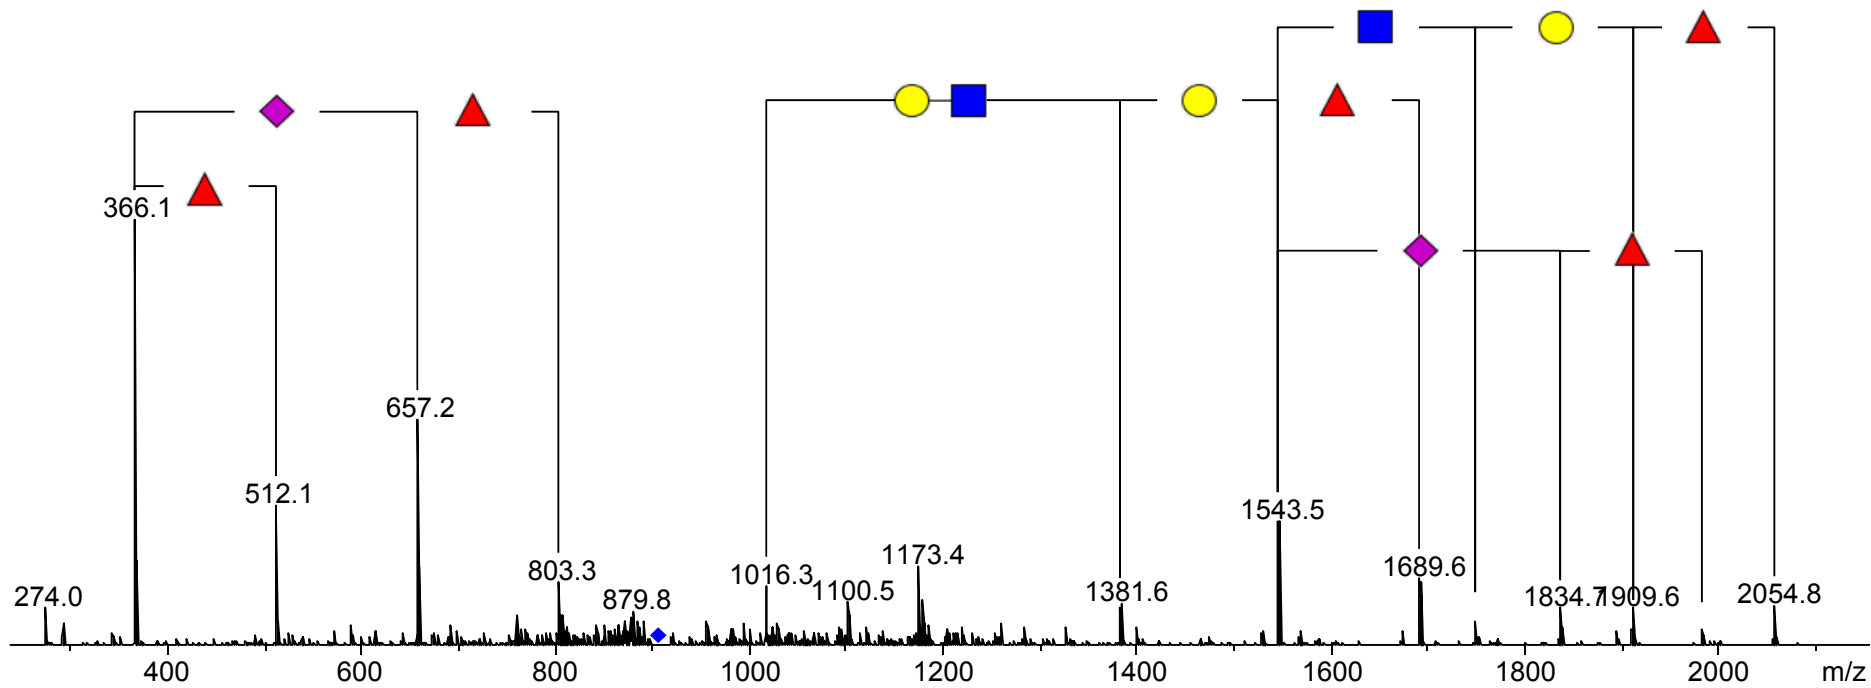

# Spectrum 136

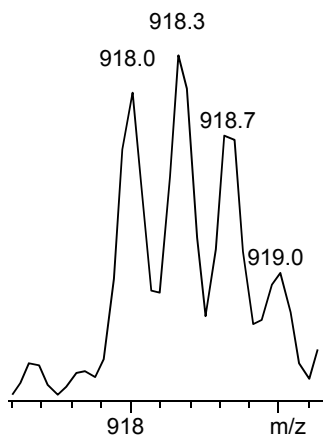

ESI MS/MS of  $[918.0 + 3H]^{3+}$

dHex2Hex5HexNAc6Neu5Ac1-AA

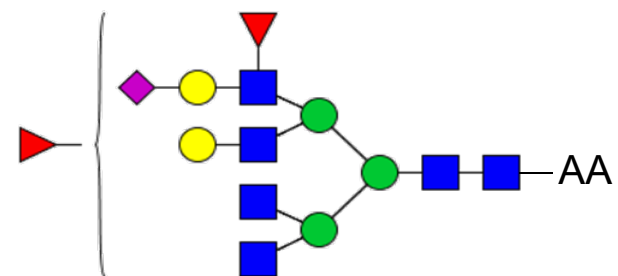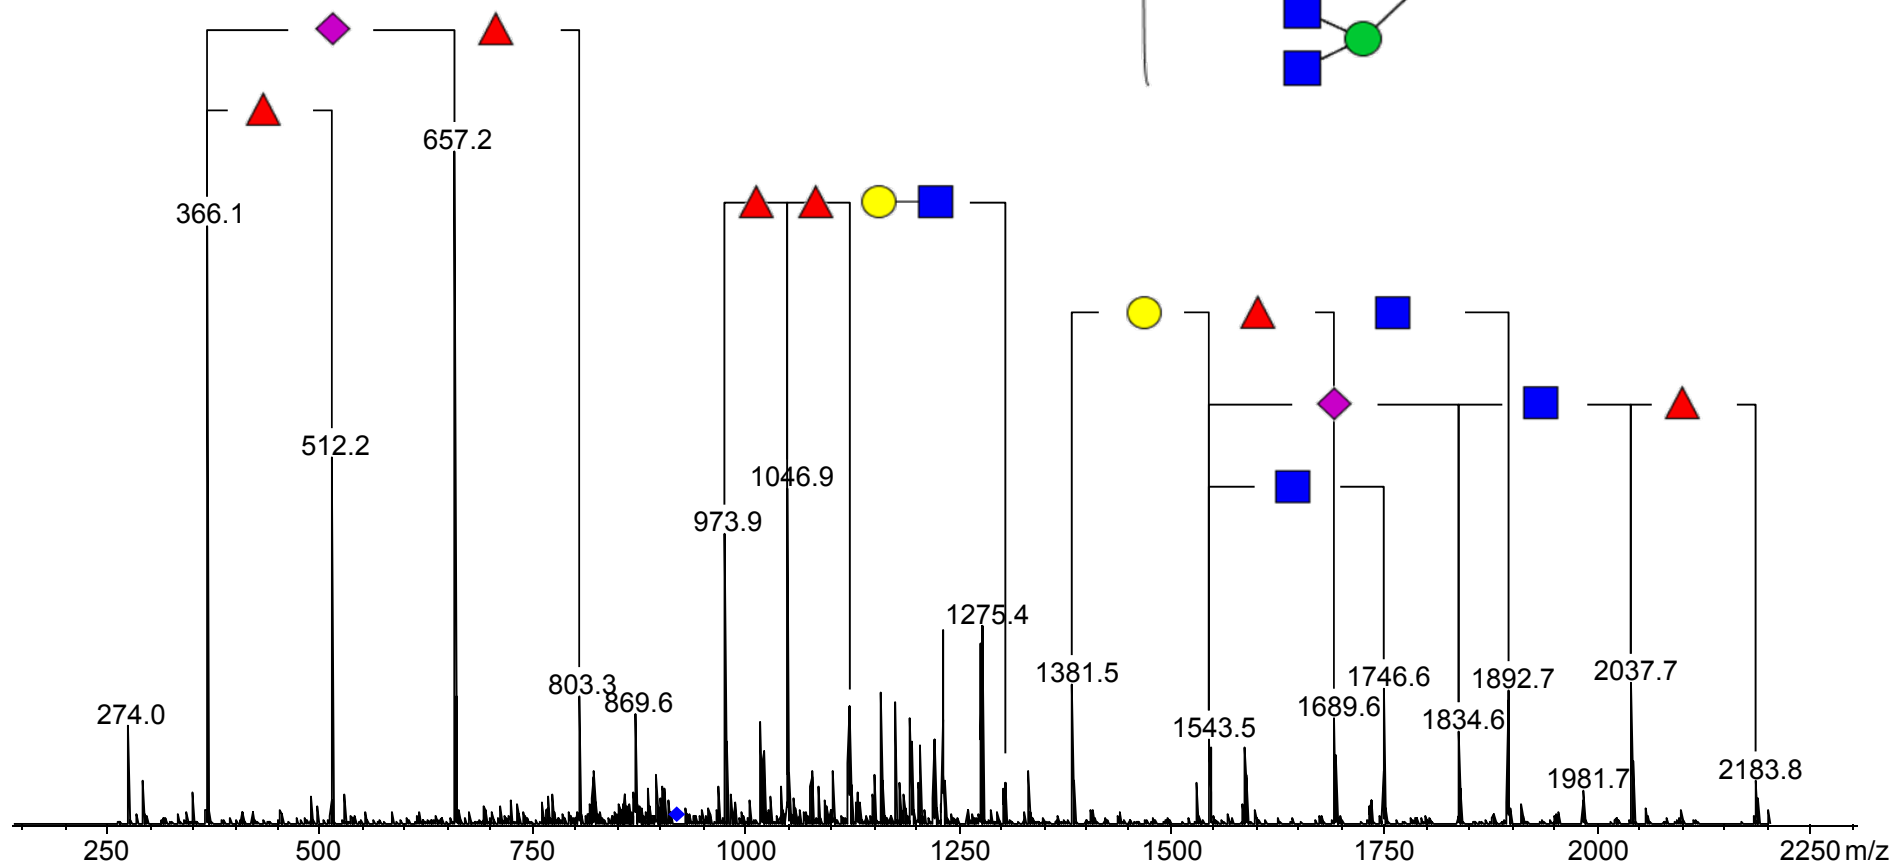

# Spectrum 137

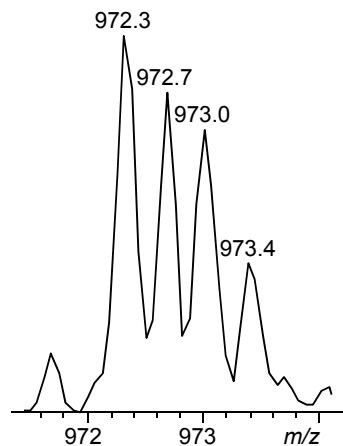

ESI MS/MS of  $[972.3+3H]^{3+}$   
dHex2Hex6HexNAc6Neu5Ac1-AA

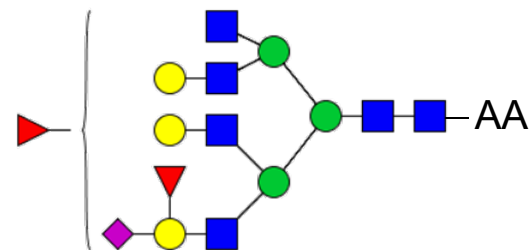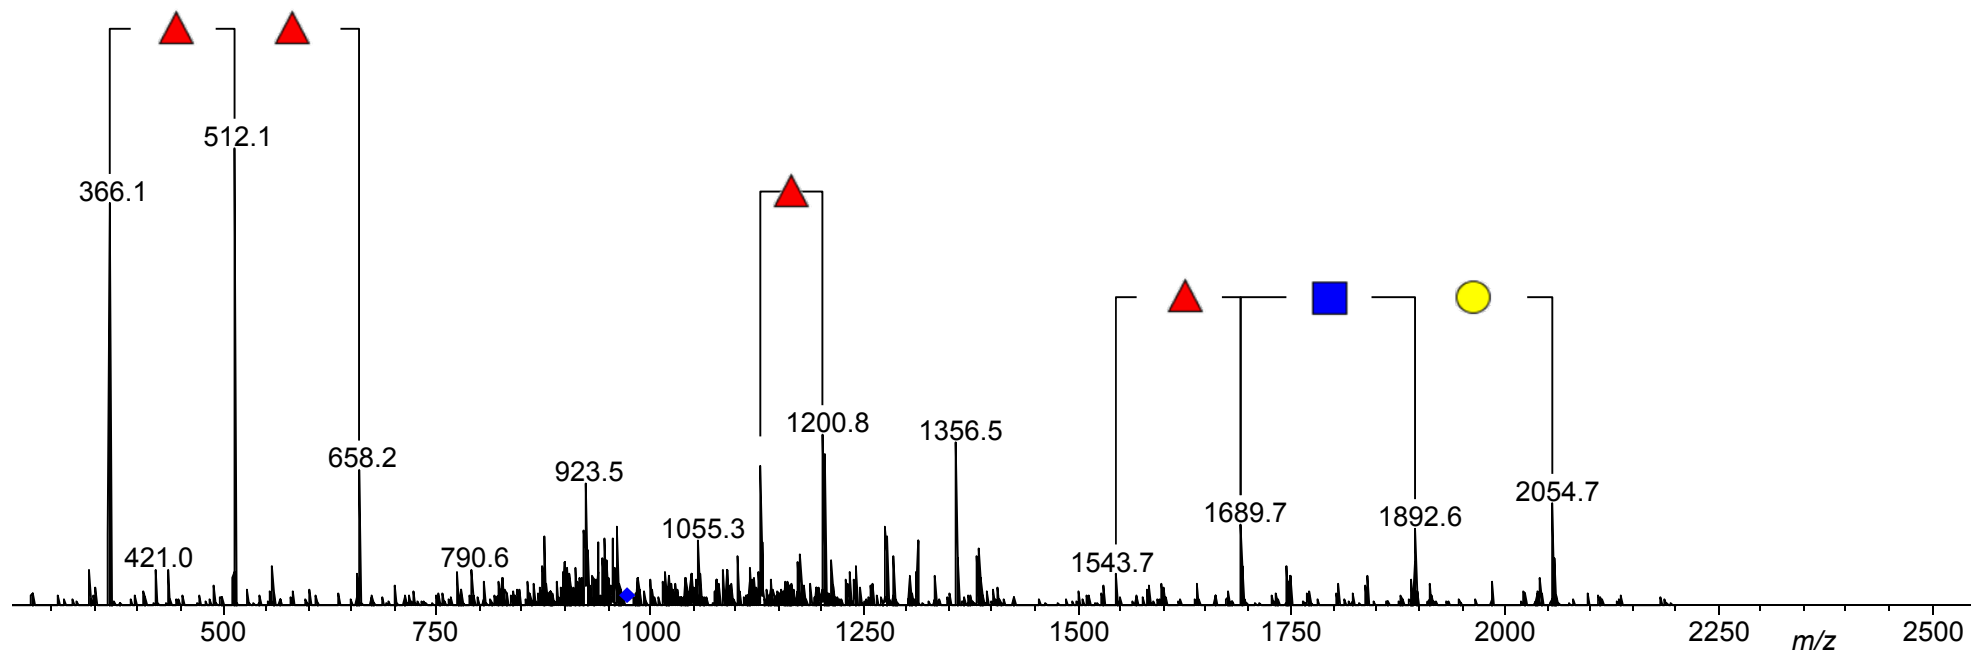

# Spectrum 138

Lift of 3059.1 [M-H]<sup>-</sup>  
dHex5Hex6HexNAc6-AA

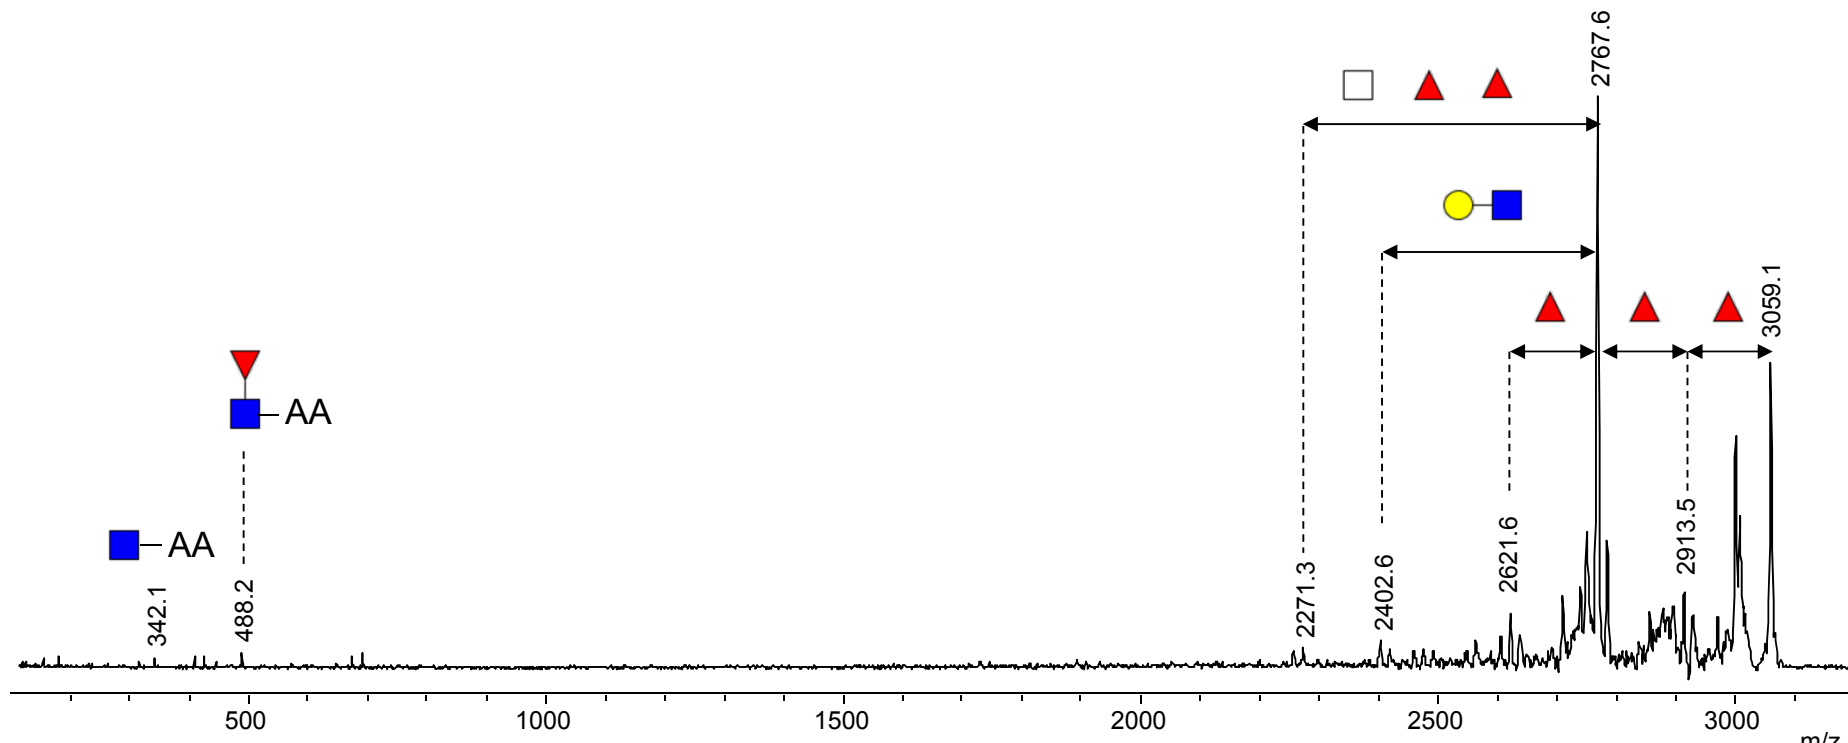



# Spectrum 139

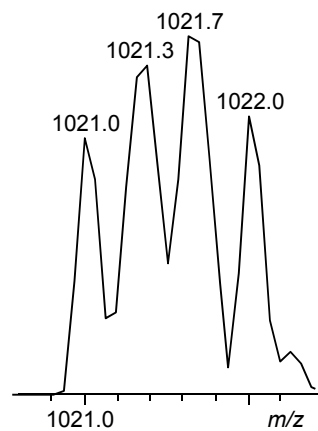

## ESI MS/MS of $[1021.0 + 3H]^{3+}$

dHex5Hex6HexNAc6-AA

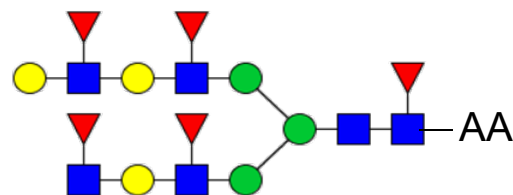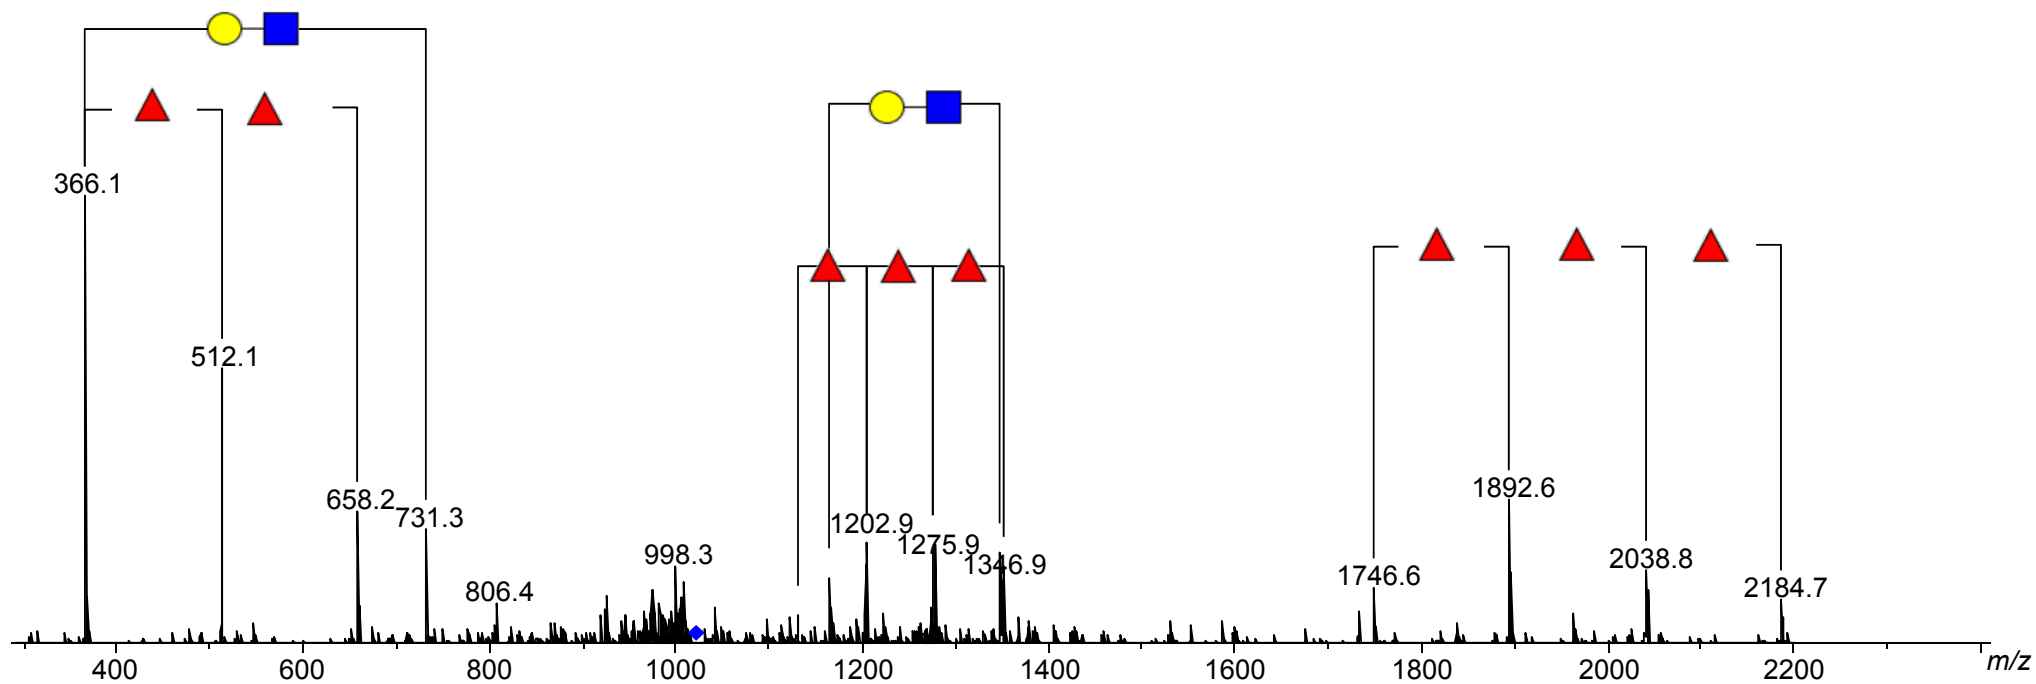

# Spectrum 140

## ESI MS/MS of [1026.1 +3H]<sup>3+</sup>

dHex2Hex7HexNAc6Neu5Ac1-AA

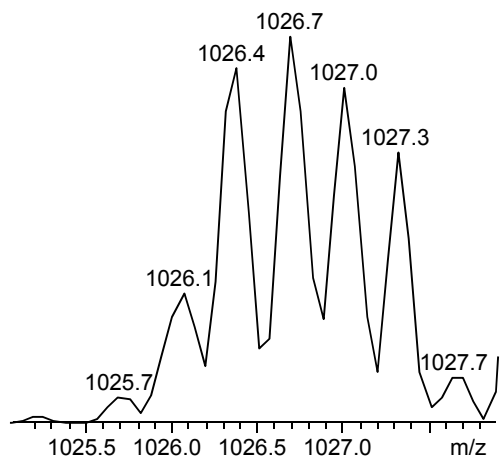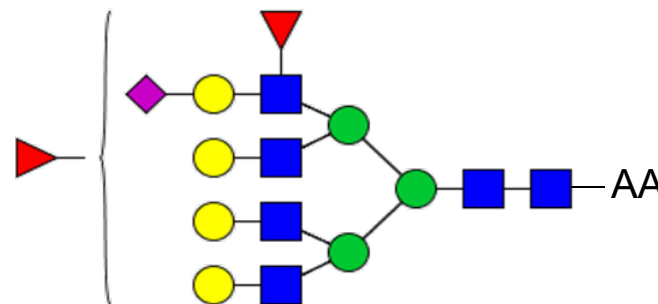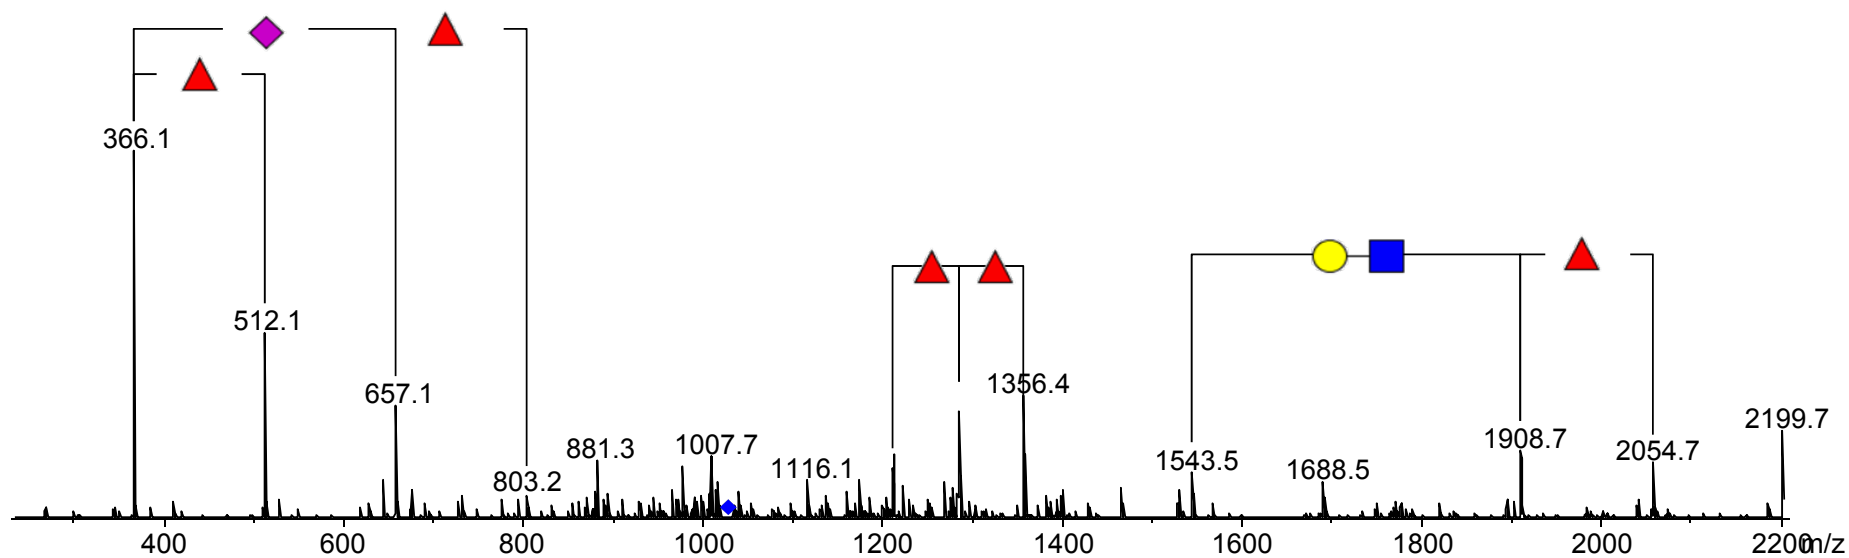

# Spectrum 141

Lift of 3221.2 [M-H]<sup>-</sup>  
dHex5Hex7HexNAc6-AA

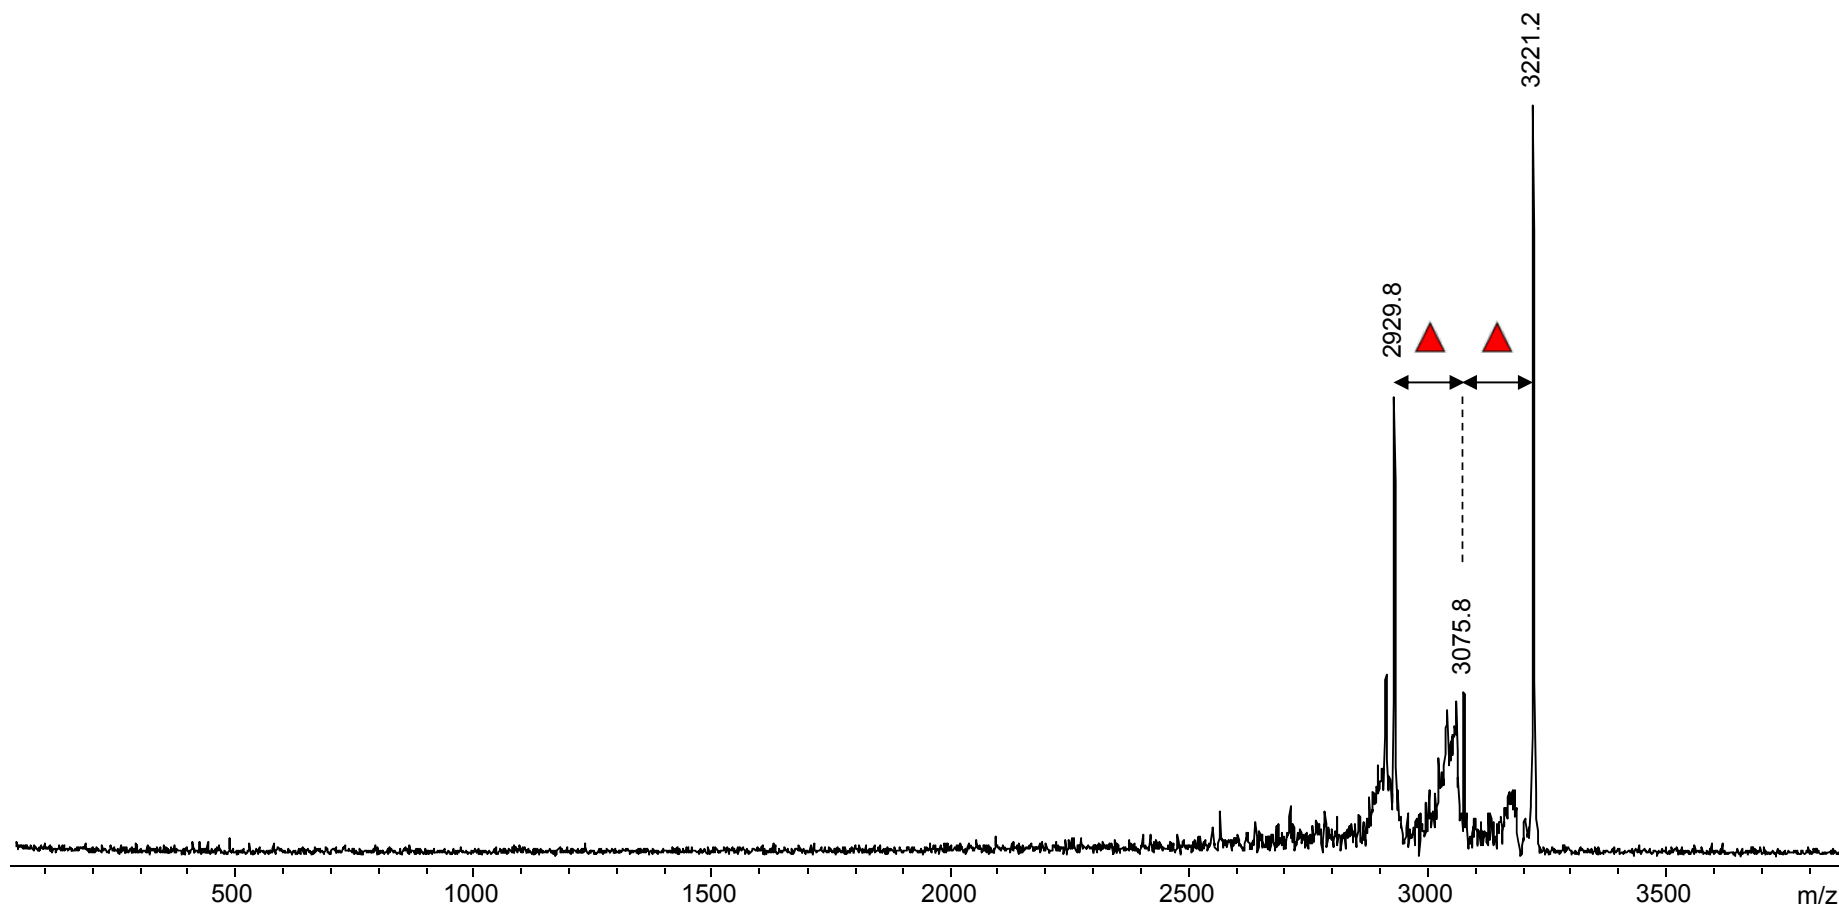

# Spectrum 142

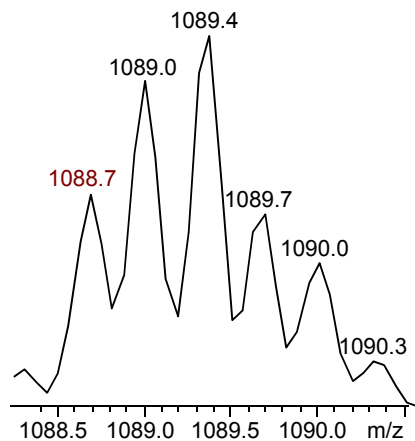

## ESI MS/MS of [1088.7 + 3H]<sup>3+</sup>

dHex5Hex6HexNAc7-AA

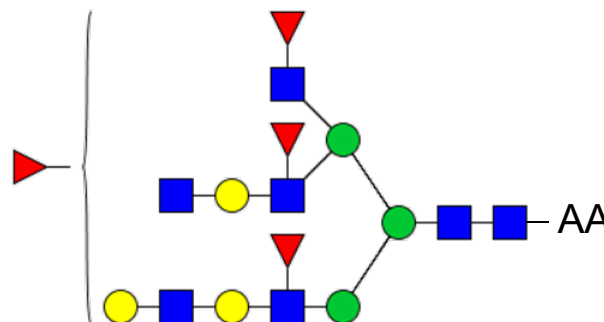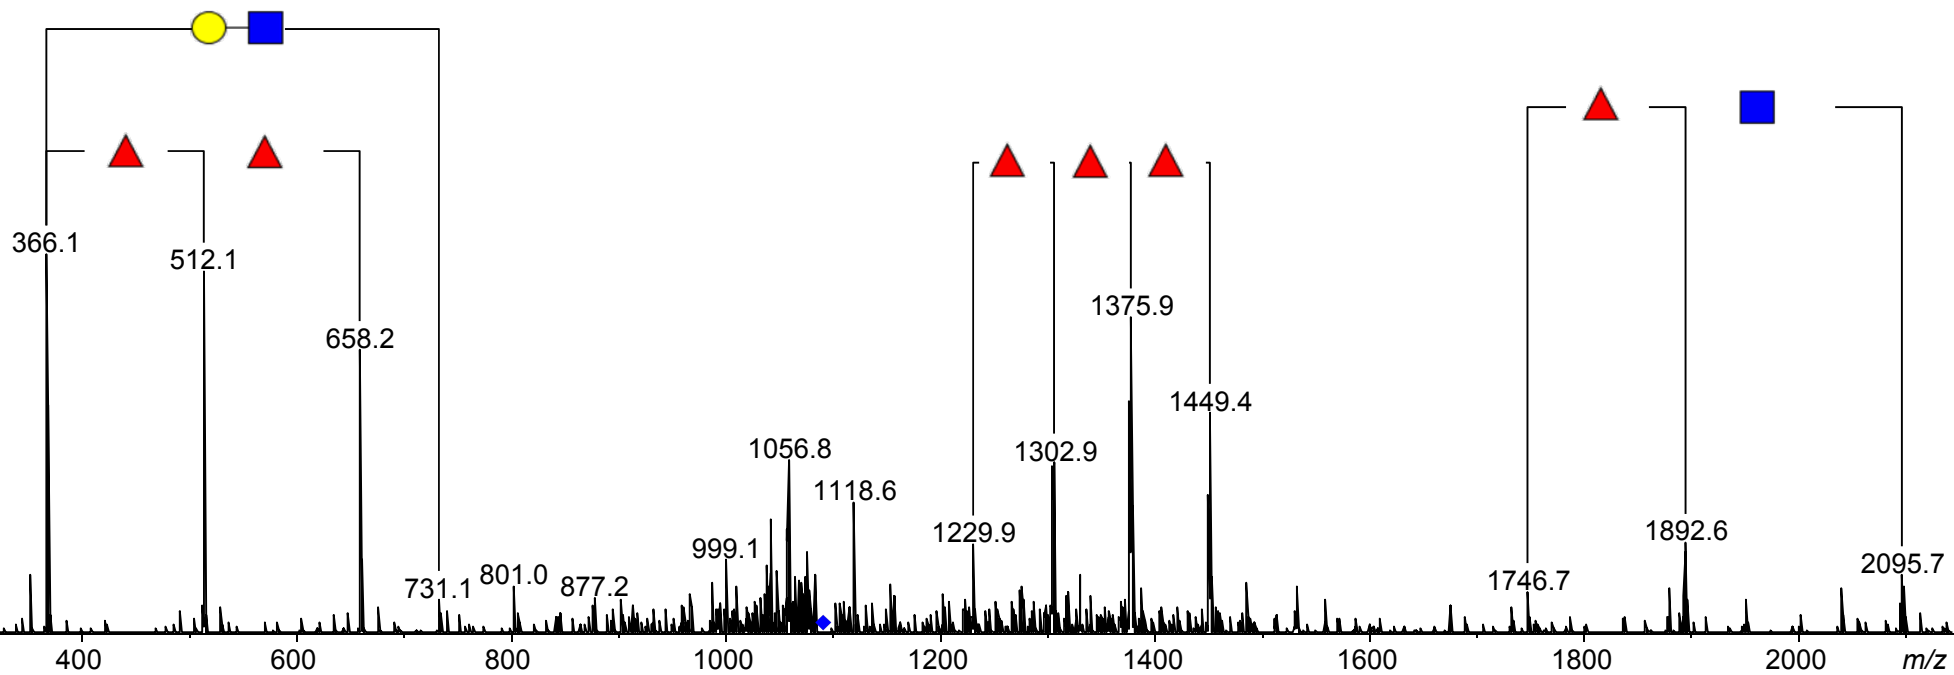

# Spectrum 143

Lift of 3408.3 [M-H]<sup>-</sup>  
Ac1dHex4Hex7HexNAc6Neu5Ac1-AA

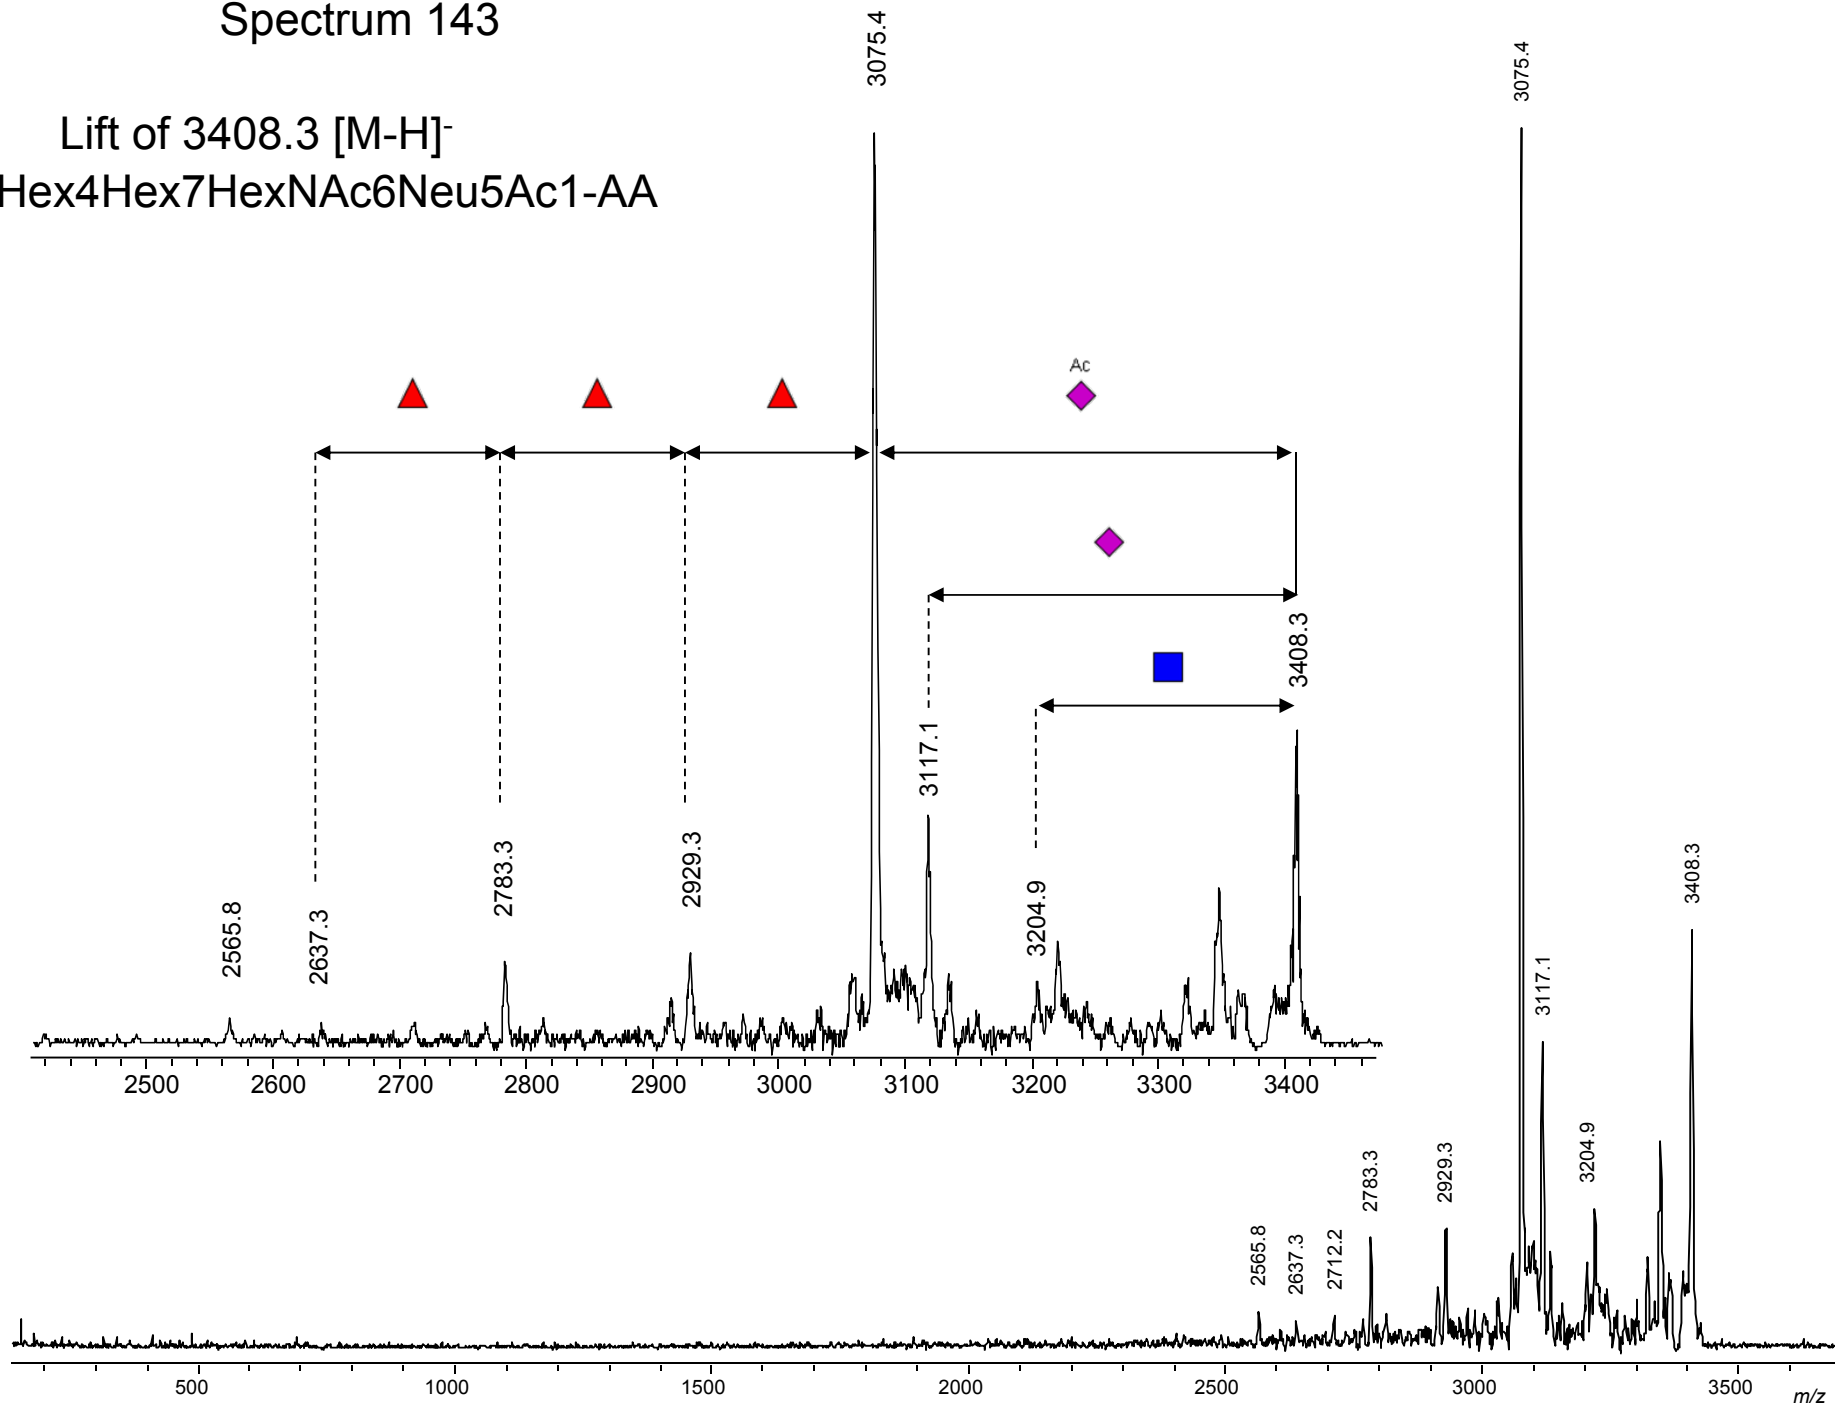

# Spectrum 144

Lift of 3512.2 [M-H]<sup>-</sup>  
dHex5Hex7HexNAc6Neu5Ac1-AA

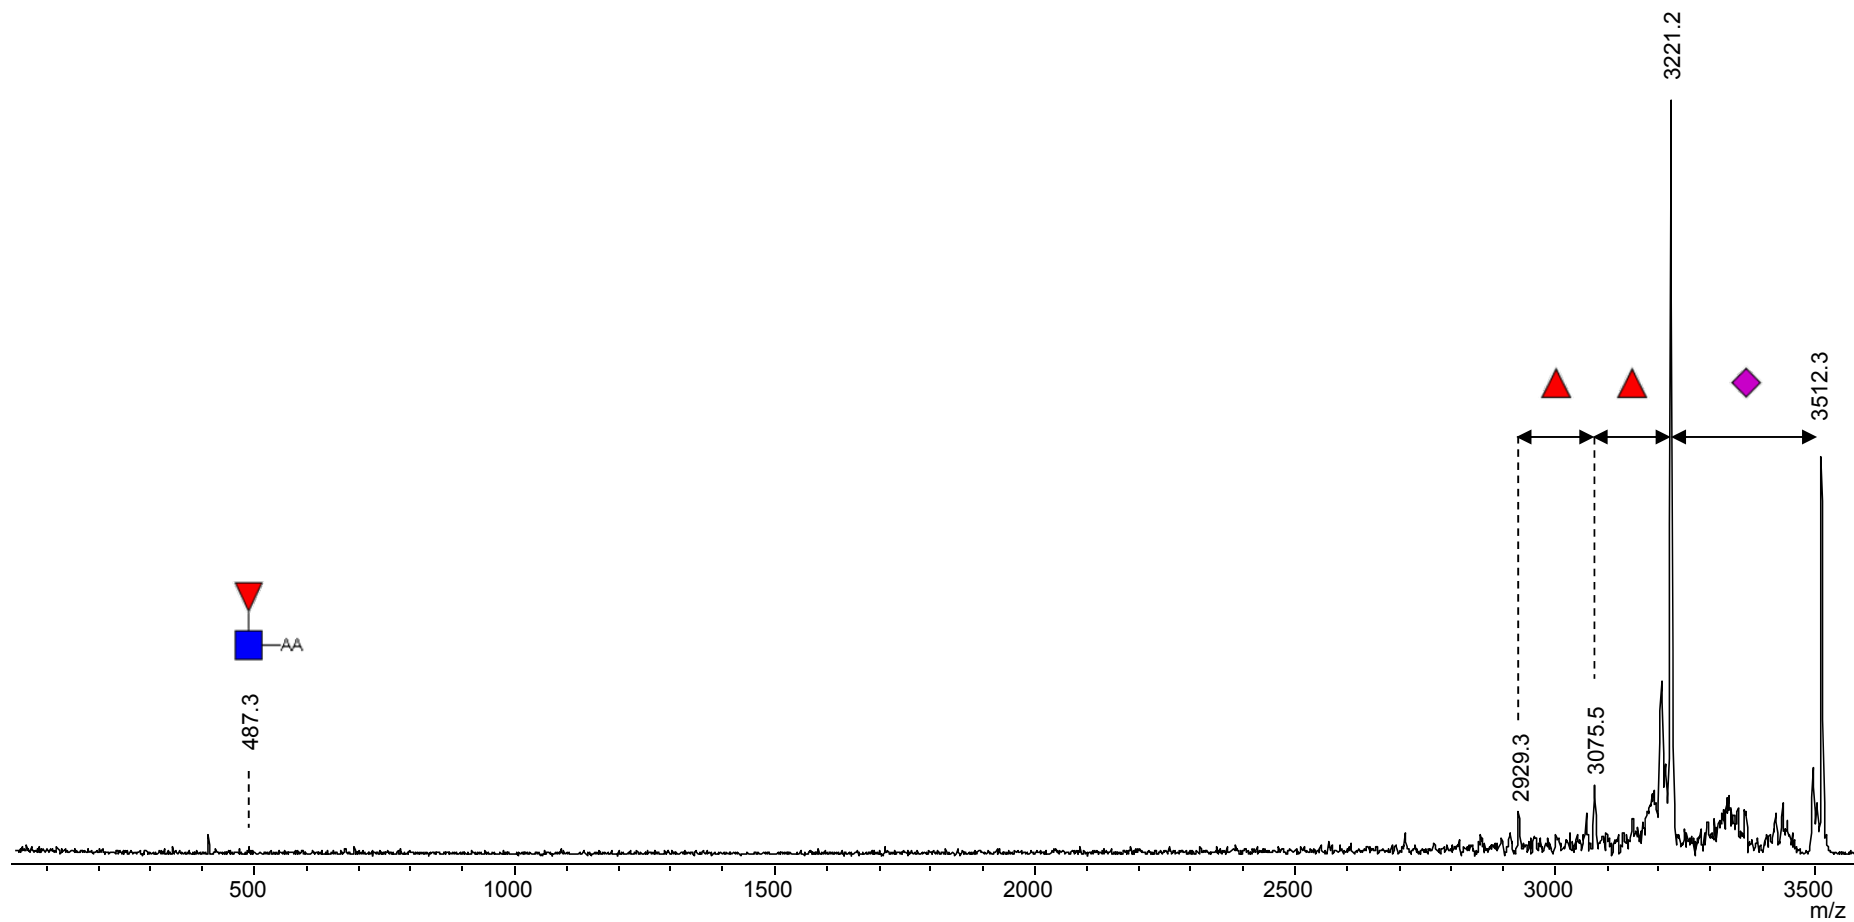

# Spectrum 145

Lift of 3715.6 [M-H]<sup>-</sup>  
dHex5Hex7HexNAc7Neu5Ac1-AA

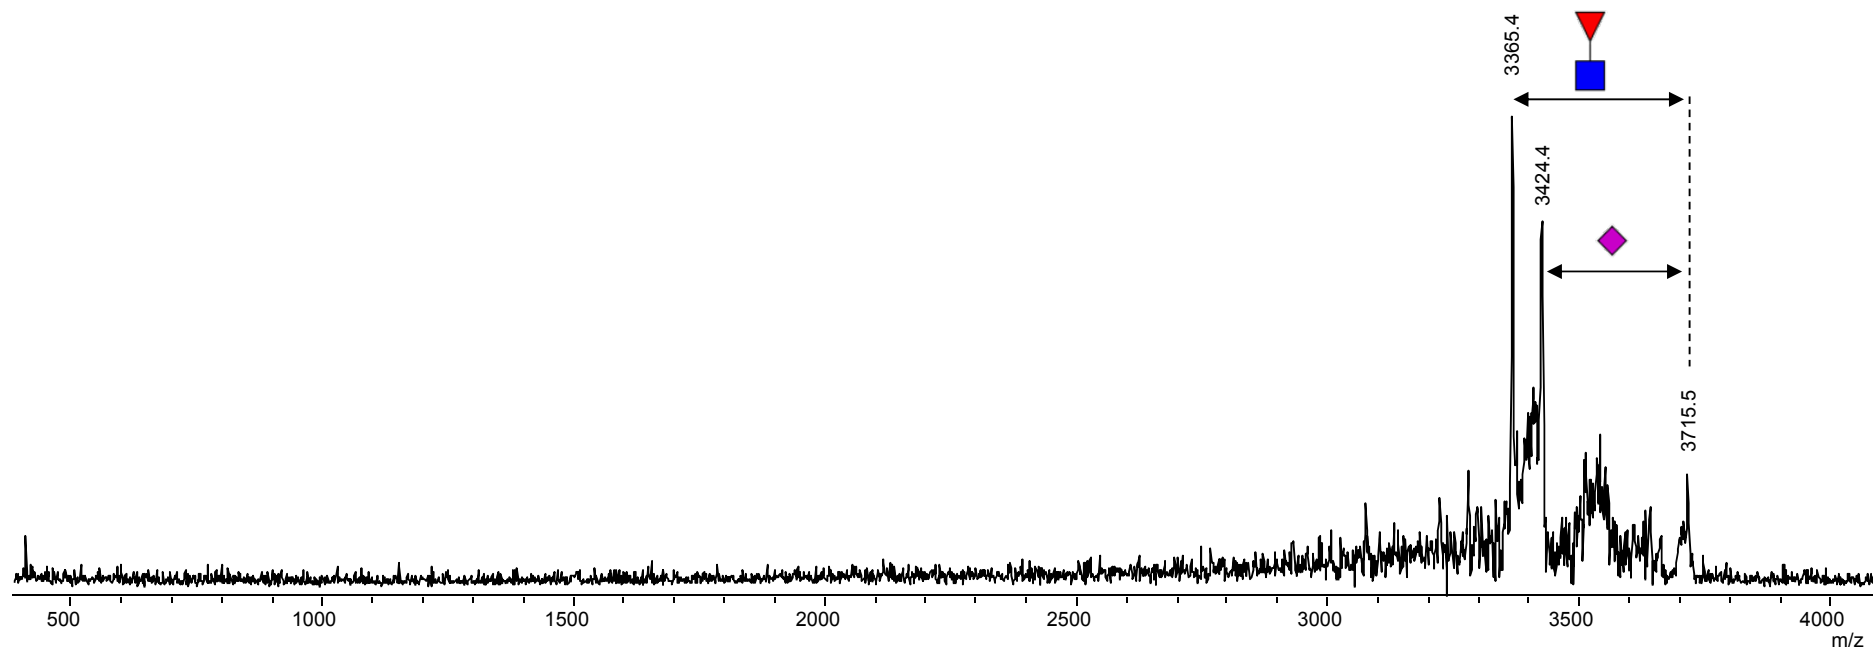

Supplement: supp_M111.011601_mcp.M111.011601-1.pdf [file supp_M111.011601_mcp.M111.011601-1.pdf]
